# Supplementary material for: How do electron donating substituents affect the electronic structure, molecular topology, vibrational properties and intra- and intermolecular interactions of polyhalogenated pyridines?
Source: Royal Society of Chemistry journal article supplement (doi:10.1039/d1cp05956d), 2022-01-01
Supplement: d1cp05956d1.pdf [file d1cp05956d1.pdf]

Supporting Information

# How Do Electron Donating Substituents Affect the Electronic Structure, Molecular Topology, Vibrational Properties and Intra-/Intermolecular Interactions of Polyhalogenated Pyridines?

Enrico Benassi,<sup>1\*</sup> Tamara Vaganova,<sup>2</sup> Evgenij Malykhin,<sup>2</sup> and Haiyan Fan<sup>3</sup>

<sup>1</sup> Novosibirsk State University, Novosibirsk, 630090, Russia.

<sup>2</sup> Vorozhtsov Novosibirsk Institute of Organic Chemistry SB RAS, Novosibirsk, 630090, Russia.

<sup>3</sup> Department of Chemistry, School of Sciences and Humanities, Nazarbayev University Nazarbayev University, Nursultan, 010000, Kazakhstan.

\* Corresponding Author: ebenassi3@gmail.com

## Index

|                                                                                             |    |        |
|---------------------------------------------------------------------------------------------|----|--------|
| A Synthesis of 2-hydroxy-3,5,6-trifluoropyridine (7)                                        | p. | SI-2   |
| B Optimised Geometries and Internal Coordinates of monomers                                 | p. | SI-3   |
| C Computed IR and Raman Spectra of monomers                                                 | p. | SI-35  |
| D Composition of the vibrational normal modes as a function of the internal coordinates     | p. | SI-151 |
| E Optimised Geometries of aggregates                                                        | p. | SI-165 |
| F Computed IR and Raman Spectra of aggregates                                               | p. | SI-182 |
| Table S1. Topological properties                                                            | p. | SI-227 |
| Table S2. In-ring electron density transfer, orbital's occupancy and delocalisation energy. | p. | SI-231 |

### A Synthesis of 2-hydroxy-3,5,6-trifluoropyridine (7)

2,3,5,6-Tetrafluoropyridine (8.3 g, 0.054 moles), sodium hydroxide (4.2 g., 0.11 moles), and water (100 ml) were stirred at 60-70 °C for 6 hr. The solution was acidified with concentrated hydrochloric acid (8 ml) and extracted with ether (3 x 70 ml). The ethereal extract was dried over MgSO<sub>4</sub> and solvent was evaporated. White solid thus obtained was sublimed at 50 °C (3 Torr) to yield 2-hydroxy-3,5,6-trifluoropyridine (6.6 g, 80%), mp 96-97 °C. <sup>1</sup>H NMR (acetone-d<sub>6</sub>) δ: 7.82 (ddd, *J*<sub>HF</sub>=7, *J*<sub>HF</sub>=8, *J*<sub>HF</sub>=8.5, H-4), 10.9 (br.s, OH). <sup>19</sup>F NMR (acetone-d<sub>6</sub>) δ: -94.8 (ddd, 1F, *J*<sub>HF</sub>=7, *J*<sub>FF</sub>=24, *J*<sub>FF</sub>=30, F-6), -140.3 (dd, 1F, *J*<sub>HF</sub>=8, *J*<sub>FF</sub>=30, F-3), -150.2 (dd, 1F, *J*<sub>HF</sub>=8.5, *J*<sub>FF</sub>=24, F-5). High-resolution MS, found: *m/z* 149.0082 [M]<sup>+</sup>. Calculated for C<sub>5</sub>H<sub>2</sub>NOF<sub>3</sub> 149.0083.

## B Optimised Geometries and Internal Coordinates of monomers

### py-01\_A\_b3lyp

|   |           |           |           |
|---|-----------|-----------|-----------|
| 6 | -0.008796 | -1.197806 | 1.122857  |
| 6 | 0.009469  | 0.182080  | 1.185910  |
| 6 | 0.016013  | 0.928425  | -0.000000 |
| 6 | 0.009469  | 0.182080  | -1.185910 |
| 6 | -0.008796 | -1.197806 | -1.122857 |
| 7 | -0.019292 | -1.878771 | -0.000000 |
| 7 | -0.005842 | 2.289435  | -0.000000 |
| 1 | 0.183465  | 2.775845  | 0.860790  |
| 1 | 0.183465  | 2.775845  | -0.860790 |
| 9 | -0.014525 | -1.893678 | 2.263153  |
| 9 | 0.025937  | 0.843150  | 2.362377  |
| 9 | -0.014525 | -1.893678 | -2.263153 |
| 9 | 0.025937  | 0.843150  | -2.362377 |

### py-01\_A\_b3p86

|   |           |           |           |
|---|-----------|-----------|-----------|
| 6 | -0.008658 | -1.194657 | 1.119743  |
| 6 | 0.009439  | 0.182851  | 1.183736  |
| 6 | 0.016124  | 0.926837  | -0.000000 |
| 6 | 0.009439  | 0.182851  | -1.183736 |
| 6 | -0.008658 | -1.194657 | -1.119743 |
| 7 | -0.019113 | -1.874201 | -0.000000 |
| 7 | -0.005371 | 2.283219  | -0.000000 |
| 1 | 0.182986  | 2.769285  | 0.860377  |
| 1 | 0.182986  | 2.769285  | -0.860377 |
| 9 | -0.014394 | -1.886385 | 2.253951  |
| 9 | 0.025796  | 0.840114  | 2.353156  |
| 9 | -0.014394 | -1.886385 | -2.253951 |
| 9 | 0.025796  | 0.840114  | -2.353156 |

### py-01\_A\_b3pw91

|   |           |           |           |
|---|-----------|-----------|-----------|
| 6 | -0.008574 | -1.195898 | 1.120602  |
| 6 | 0.009145  | 0.183060  | 1.185004  |
| 6 | 0.015579  | 0.928204  | -0.000000 |
| 6 | 0.009145  | 0.183060  | -1.185004 |
| 6 | -0.008574 | -1.195898 | -1.120602 |
| 7 | -0.018830 | -1.875834 | 0.000000  |
| 7 | -0.007485 | 2.286326  | -0.000000 |
| 1 | 0.184668  | 2.772272  | 0.859769  |
| 1 | 0.184668  | 2.772272  | -0.859769 |
| 9 | -0.014129 | -1.889470 | 2.255654  |
| 9 | 0.025248  | 0.839823  | 2.356515  |
| 9 | -0.014129 | -1.889470 | -2.255654 |
| 9 | 0.025248  | 0.839823  | -2.356515 |

py-01\_A\_blyp

|   |           |           |           |
|---|-----------|-----------|-----------|
| 6 | -0.008925 | -1.209037 | 1.131875  |
| 6 | 0.008071  | 0.181674  | 1.195138  |
| 6 | 0.013424  | 0.936410  | -0.000000 |
| 6 | 0.008071  | 0.181674  | -1.195138 |
| 6 | -0.008925 | -1.209037 | -1.131875 |
| 7 | -0.019177 | -1.896755 | 0.000000  |
| 7 | -0.017871 | 2.309567  | -0.000000 |
| 1 | 0.191638  | 2.796526  | 0.865156  |
| 1 | 0.191638  | 2.796526  | -0.865156 |
| 9 | -0.013319 | -1.917999 | 2.288242  |
| 9 | 0.025335  | 0.853361  | 2.388160  |
| 9 | -0.013319 | -1.917999 | -2.288242 |
| 9 | 0.025335  | 0.853361  | -2.388160 |

py-01\_A\_bp86

|   |           |           |           |
|---|-----------|-----------|-----------|
| 6 | -0.008391 | -1.206143 | 1.129922  |
| 6 | 0.006556  | 0.183376  | 1.194147  |
| 6 | 0.010874  | 0.934901  | 0.000000  |
| 6 | 0.006556  | 0.183376  | -1.194147 |
| 6 | -0.008391 | -1.206143 | -1.129922 |
| 7 | -0.017842 | -1.892750 | -0.000000 |
| 7 | -0.024324 | 2.304040  | 0.000000  |
| 1 | 0.196591  | 2.787410  | 0.865357  |
| 1 | 0.196591  | 2.787410  | -0.865357 |
| 9 | -0.011586 | -1.910618 | 2.279198  |
| 9 | 0.023464  | 0.852014  | 2.378555  |
| 9 | -0.011586 | -1.910618 | -2.279198 |
| 9 | 0.023464  | 0.852014  | -2.378555 |

py-01\_A\_bpw91

py-01\_A\_camb3lyp

|   |           |           |           |
|---|-----------|-----------|-----------|
| 6 | -0.010182 | -1.193934 | 1.117745  |
| 6 | 0.014974  | 0.180376  | 1.180456  |
| 6 | 0.026188  | 0.923832  | -0.000000 |
| 6 | 0.014974  | 0.180376  | -1.180456 |
| 6 | -0.010182 | -1.193934 | -1.117745 |
| 7 | -0.023588 | -1.872698 | 0.000000  |
| 7 | 0.025023  | 2.278497  | -0.000000 |
| 1 | 0.160589  | 2.773691  | 0.864452  |
| 1 | 0.160589  | 2.773691  | -0.864452 |
| 9 | -0.020544 | -1.882881 | 2.253833  |
| 9 | 0.032341  | 0.837068  | 2.351884  |
| 9 | -0.020544 | -1.882881 | -2.253833 |
| 9 | 0.032341  | 0.837068  | -2.351884 |

py-01\_A\_mn15

|   |           |           |           |
|---|-----------|-----------|-----------|
| 6 | -0.013900 | -1.199145 | 1.121755  |
| 6 | 0.028364  | 0.178960  | 1.184523  |
| 6 | 0.051158  | 0.922189  | -0.000000 |
| 6 | 0.028364  | 0.178960  | -1.184523 |
| 6 | -0.013900 | -1.199145 | -1.121755 |
| 7 | -0.034767 | -1.879525 | 0.000000  |
| 7 | 0.092737  | 2.277922  | -0.000000 |
| 1 | 0.108301  | 2.785424  | 0.870471  |
| 1 | 0.108301  | 2.785424  | -0.870471 |
| 9 | -0.034851 | -1.882257 | 2.257880  |
| 9 | 0.048510  | 0.835860  | 2.351514  |
| 9 | -0.034851 | -1.882257 | -2.257880 |
| 9 | 0.048510  | 0.835860  | -2.351514 |

py-01\_A\_o3lyp

|   |           |           |           |
|---|-----------|-----------|-----------|
| 6 | -0.007192 | -0.989076 | 1.122299  |
| 6 | 0.000574  | 0.393527  | 1.187854  |
| 6 | 0.001116  | 1.141259  | -0.000000 |
| 6 | 0.000574  | 0.393527  | -1.187854 |
| 6 | -0.007192 | -0.989076 | -1.122299 |
| 7 | -0.012656 | -1.670352 | 0.000000  |
| 7 | -0.041494 | 2.503639  | -0.000000 |
| 1 | 0.179865  | 2.984736  | 0.854706  |
| 1 | 0.179865  | 2.984736  | -0.854706 |
| 9 | -0.007208 | -1.687169 | 2.258483  |
| 9 | 0.012319  | 1.048085  | 2.363432  |
| 9 | -0.007208 | -1.687169 | -2.258483 |
| 9 | 0.012319  | 1.048085  | -2.363432 |

py-01\_A\_pbe0

|   |           |           |           |
|---|-----------|-----------|-----------|
| 6 | -0.008291 | -1.193621 | 1.119043  |
| 6 | 0.008371  | 0.183630  | 1.183516  |
| 6 | 0.014189  | 0.926652  | -0.000000 |
| 6 | 0.008371  | 0.183630  | -1.183516 |
| 6 | -0.008291 | -1.193621 | -1.119043 |
| 7 | -0.018061 | -1.873126 | -0.000000 |
| 7 | -0.010300 | 2.282524  | -0.000000 |
| 1 | 0.186987  | 2.765918  | 0.859431  |
| 1 | 0.186987  | 2.765918  | -0.859431 |
| 9 | -0.013183 | -1.883633 | 2.250912  |
| 9 | 0.024191  | 0.838817  | 2.350872  |
| 9 | -0.013183 | -1.883633 | -2.250912 |
| 9 | 0.024191  | 0.838817  | -2.350872 |

py-01\_A\_pbe

|   |           |           |           |
|---|-----------|-----------|-----------|
| 6 | -0.008567 | -1.204652 | 1.128478  |
| 6 | 0.007286  | 0.183386  | 1.192784  |
| 6 | 0.011963  | 0.933916  | -0.000000 |
| 6 | 0.007286  | 0.183386  | -1.192784 |
| 6 | -0.008567 | -1.204652 | -1.128478 |
| 7 | -0.018376 | -1.890003 | -0.000000 |
| 7 | -0.020513 | 2.300444  | 0.000000  |
| 1 | 0.193656  | 2.784822  | 0.865303  |
| 1 | 0.193656  | 2.784822  | -0.865303 |
| 9 | -0.012235 | -1.907331 | 2.276552  |
| 9 | 0.024312  | 0.850732  | 2.375191  |
| 9 | -0.012235 | -1.907331 | -2.276552 |
| 9 | 0.024312  | 0.850732  | -2.375191 |

py-01\_A\_rtpss

|   |           |           |           |
|---|-----------|-----------|-----------|
| 6 | -0.006924 | -1.200119 | 1.125183  |
| 6 | 0.001352  | 0.184433  | 1.188624  |
| 6 | 0.002314  | 0.933971  | -0.000000 |
| 6 | 0.001352  | 0.184433  | -1.188624 |
| 6 | -0.006924 | -1.200119 | -1.125183 |
| 7 | -0.013707 | -1.892930 | -0.000000 |
| 7 | -0.053940 | 2.304515  | 0.000000  |
| 1 | 0.217395  | 2.771756  | 0.858629  |
| 1 | 0.217395  | 2.771756  | -0.858629 |
| 9 | -0.005650 | -1.901185 | 2.273421  |
| 9 | 0.017483  | 0.851472  | 2.372341  |
| 9 | -0.005650 | -1.901185 | -2.273421 |
| 9 | 0.017483  | 0.851472  | -2.372341 |

py-01\_A\_tpssh

|   |           |           |           |
|---|-----------|-----------|-----------|
| 6 | -0.007816 | -1.197787 | 1.122837  |
| 6 | 0.005578  | 0.183421  | 1.186590  |
| 6 | 0.009356  | 0.930877  | -0.000000 |
| 6 | 0.005578  | 0.183421  | -1.186590 |
| 6 | -0.007816 | -1.197787 | -1.122837 |
| 7 | -0.016498 | -1.883916 | 0.000000  |
| 7 | -0.030179 | 2.295378  | -0.000000 |
| 1 | 0.200299  | 2.772740  | 0.858192  |
| 1 | 0.200299  | 2.772740  | -0.858192 |
| 9 | -0.010214 | -1.896010 | 2.263767  |
| 9 | 0.021803  | 0.845602  | 2.364416  |
| 9 | -0.010214 | -1.896010 | -2.263767 |
| 9 | 0.021803  | 0.845602  | -2.364416 |

py-01\_A\_wb97xd

|   |           |           |          |
|---|-----------|-----------|----------|
| 6 | -0.008494 | -1.194651 | 1.119009 |
| 6 | 0.009561  | 0.182845  | 1.182948 |

|   |           |           |           |
|---|-----------|-----------|-----------|
| 6 | 0.016619  | 0.926602  | -0.000000 |
| 6 | 0.009561  | 0.182845  | -1.182948 |
| 6 | -0.008494 | -1.194651 | -1.119009 |
| 7 | -0.018766 | -1.875235 | -0.000000 |
| 7 | -0.004001 | 2.285076  | -0.000000 |
| 1 | 0.182595  | 2.771634  | 0.859550  |
| 1 | 0.182595  | 2.771634  | -0.859550 |
| 9 | -0.014740 | -1.885171 | 2.251263  |
| 9 | 0.025141  | 0.836257  | 2.353199  |
| 9 | -0.014740 | -1.885171 | -2.251263 |
| 9 | 0.025141  | 0.836257  | -2.353199 |

py-01\_A\_x3lyp

|   |           |           |           |
|---|-----------|-----------|-----------|
| 6 | -0.009053 | -1.197853 | 1.121791  |
| 6 | 0.010517  | 0.181505  | 1.185123  |
| 6 | 0.017959  | 0.928411  | -0.000000 |
| 6 | 0.010517  | 0.181505  | -1.185123 |
| 6 | -0.009053 | -1.197853 | -1.121791 |
| 7 | -0.020086 | -1.878973 | 0.000000  |
| 7 | -0.000821 | 2.288932  | -0.000000 |
| 1 | 0.179620  | 2.777778  | 0.861105  |
| 1 | 0.179620  | 2.777778  | -0.861105 |
| 9 | -0.015653 | -1.892368 | 2.261448  |
| 9 | 0.027032  | 0.840889  | 2.361236  |
| 9 | -0.015653 | -1.892368 | -2.261448 |
| 9 | 0.027032  | 0.840889  | -2.361236 |

py-04\_A\_b3lyp

|    |           |           |           |
|----|-----------|-----------|-----------|
| 6  | -0.008220 | -1.190665 | 1.120129  |
| 6  | 0.016005  | 0.186439  | 1.174559  |
| 6  | 0.024221  | 0.930856  | -0.014840 |
| 6  | 0.012651  | 0.186424  | -1.211093 |
| 6  | -0.011727 | -1.198053 | -1.122470 |
| 7  | -0.023171 | -1.878164 | -0.000305 |
| 7  | 0.018247  | 2.286884  | 0.016996  |
| 1  | 0.161201  | 2.758347  | 0.894230  |
| 1  | 0.165101  | 2.803126  | -0.834346 |
| 9  | -0.015780 | -1.881921 | 2.262079  |
| 9  | 0.035314  | 0.852825  | 2.349307  |
| 9  | -0.023715 | -1.914056 | -2.249749 |
| 17 | 0.030593  | 1.007512  | -2.747141 |

py-04\_A\_b3p86

|   |           |           |           |
|---|-----------|-----------|-----------|
| 6 | -0.008287 | -1.187719 | 1.116568  |
| 6 | 0.016563  | 0.187067  | 1.172573  |
| 6 | 0.025286  | 0.929190  | -0.014534 |
| 6 | 0.013344  | 0.187452  | -1.208602 |

|    |           |           |           |
|----|-----------|-----------|-----------|
| 6  | -0.011717 | -1.194502 | -1.119406 |
| 7  | -0.023499 | -1.873889 | -0.000723 |
| 7  | 0.021388  | 2.280348  | 0.016364  |
| 1  | 0.159110  | 2.753312  | 0.892871  |
| 1  | 0.161855  | 2.795378  | -0.836390 |
| 9  | -0.016345 | -1.875010 | 2.252288  |
| 9  | 0.035828  | 0.849560  | 2.340148  |
| 9  | -0.024065 | -1.905349 | -2.241118 |
| 17 | 0.031259  | 1.003717  | -2.732680 |

py-04\_A\_b3pw91

|    |           |           |           |
|----|-----------|-----------|-----------|
| 6  | -0.008211 | -1.188916 | 1.117443  |
| 6  | 0.016180  | 0.187276  | 1.173798  |
| 6  | 0.024598  | 0.930557  | -0.014612 |
| 6  | 0.013010  | 0.187775  | -1.210132 |
| 6  | -0.011603 | -1.195728 | -1.120342 |
| 7  | -0.023185 | -1.875410 | -0.000717 |
| 7  | 0.019109  | 2.283350  | 0.016591  |
| 1  | 0.160882  | 2.756166  | 0.892654  |
| 1  | 0.163870  | 2.798673  | -0.835295 |
| 9  | -0.016030 | -1.878056 | 2.254002  |
| 9  | 0.035229  | 0.849309  | 2.343464  |
| 9  | -0.023710 | -1.908776 | -2.242562 |
| 17 | 0.030580  | 1.003334  | -2.736934 |

py-04\_A\_blyp

|    |           |           |           |
|----|-----------|-----------|-----------|
| 6  | -0.007990 | -1.201937 | 1.129427  |
| 6  | 0.013250  | 0.186048  | 1.183601  |
| 6  | 0.019033  | 0.938553  | -0.015075 |
| 6  | 0.009831  | 0.186457  | -1.221127 |
| 6  | -0.011532 | -1.208443 | -1.131226 |
| 7  | -0.021964 | -1.895599 | 0.000191  |
| 7  | 0.000146  | 2.307324  | 0.017752  |
| 1  | 0.174000  | 2.777674  | 0.899289  |
| 1  | 0.178566  | 2.822778  | -0.837744 |
| 9  | -0.013082 | -1.906230 | 2.287649  |
| 9  | 0.032993  | 0.863261  | 2.374663  |
| 9  | -0.021238 | -1.939072 | -2.273852 |
| 17 | 0.028708  | 1.018742  | -2.776190 |

py-04\_A\_bp86

|   |           |           |           |
|---|-----------|-----------|-----------|
| 6 | -0.007666 | -1.199610 | 1.126998  |
| 6 | 0.011836  | 0.187425  | 1.183482  |
| 6 | 0.016622  | 0.937034  | -0.013716 |
| 6 | 0.008754  | 0.188278  | -1.218315 |
| 6 | -0.010986 | -1.205227 | -1.129512 |
| 7 | -0.020871 | -1.892104 | -0.000560 |



|    |           |           |           |
|----|-----------|-----------|-----------|
| 7  | -0.005785 | 2.301423  | 0.015721  |
| 1  | 0.179569  | 2.772053  | 0.895746  |
| 1  | 0.181794  | 2.809743  | -0.843692 |
| 9  | -0.011813 | -1.899980 | 2.277706  |
| 9  | 0.031083  | 0.860772  | 2.366153  |
| 9  | -0.019373 | -1.928760 | -2.266328 |
| 17 | 0.027556  | 1.018507  | -2.756323 |

py-04\_A\_bpw91

py-04\_A\_camb3lyp

|    |           |           |           |
|----|-----------|-----------|-----------|
| 6  | -0.011391 | -1.185996 | 1.114590  |
| 6  | 0.030249  | 0.184760  | 1.167938  |
| 6  | 0.050487  | 0.925806  | -0.016806 |
| 6  | 0.025803  | 0.184880  | -1.207747 |
| 6  | -0.015813 | -1.193989 | -1.117184 |
| 7  | -0.034267 | -1.871953 | -0.000550 |
| 7  | 0.091426  | 2.274579  | 0.018170  |
| 1  | 0.107621  | 2.754374  | 0.901013  |
| 1  | 0.105957  | 2.806716  | -0.834235 |
| 9  | -0.029980 | -1.869735 | 2.252460  |
| 9  | 0.052537  | 0.847946  | 2.337018  |
| 9  | -0.039424 | -1.903708 | -2.239968 |
| 17 | 0.047515  | 0.995875  | -2.737340 |

py-04\_A\_mn15

|    |           |           |           |
|----|-----------|-----------|-----------|
| 6  | -0.011489 | -1.190650 | 1.117883  |
| 6  | 0.030240  | 0.184900  | 1.171330  |
| 6  | 0.050463  | 0.925976  | -0.017061 |
| 6  | 0.025803  | 0.184275  | -1.210414 |
| 6  | -0.015882 | -1.198531 | -1.121465 |
| 7  | -0.034387 | -1.878649 | -0.001092 |
| 7  | 0.091478  | 2.279072  | 0.017522  |
| 1  | 0.107690  | 2.760432  | 0.903082  |
| 1  | 0.106043  | 2.812743  | -0.837995 |
| 9  | -0.029893 | -1.868502 | 2.255925  |
| 9  | 0.052444  | 0.847174  | 2.336176  |
| 9  | -0.039224 | -1.900911 | -2.245625 |
| 17 | 0.047434  | 0.992225  | -2.730908 |

py-04\_A\_o3lyp

|   |           |           |           |
|---|-----------|-----------|-----------|
| 6 | -0.007141 | -1.190397 | 1.119013  |
| 6 | 0.012085  | 0.189360  | 1.175704  |
| 6 | 0.017073  | 0.934922  | -0.015789 |
| 6 | 0.008974  | 0.189849  | -1.214687 |
| 6 | -0.010467 | -1.197480 | -1.122571 |

|    |           |           |           |
|----|-----------|-----------|-----------|
| 7  | -0.019822 | -1.877944 | -0.000668 |
| 7  | -0.005317 | 2.292318  | 0.017783  |
| 1  | 0.178185  | 2.756762  | 0.889740  |
| 1  | 0.183116  | 2.803173  | -0.826923 |
| 9  | -0.011570 | -1.883779 | 2.256871  |
| 9  | 0.029643  | 0.849344  | 2.349254  |
| 9  | -0.019295 | -1.917054 | -2.244222 |
| 17 | 0.025257  | 1.000480  | -2.746147 |

py-04\_A\_pbe0

|    |           |           |           |
|----|-----------|-----------|-----------|
| 6  | -0.007991 | -1.186642 | 1.115682  |
| 6  | 0.015529  | 0.187891  | 1.172304  |
| 6  | 0.023492  | 0.929245  | -0.014519 |
| 6  | 0.012400  | 0.188118  | -1.208201 |
| 6  | -0.011369 | -1.193806 | -1.118972 |
| 7  | -0.022576 | -1.872989 | -0.000963 |
| 7  | 0.016649  | 2.279611  | 0.016146  |
| 1  | 0.162792  | 2.750498  | 0.891865  |
| 1  | 0.165805  | 2.792561  | -0.835748 |
| 9  | -0.015260 | -1.872215 | 2.248995  |
| 9  | 0.034311  | 0.848124  | 2.337936  |
| 9  | -0.022889 | -1.902395 | -2.238416 |
| 17 | 0.029826  | 1.001555  | -2.728751 |

py-04\_A\_pbe

|    |           |           |           |
|----|-----------|-----------|-----------|
| 6  | -0.007824 | -1.197969 | 1.125261  |
| 6  | 0.012775  | 0.187574  | 1.181655  |
| 6  | 0.018230  | 0.936223  | -0.014203 |
| 6  | 0.009625  | 0.188515  | -1.217538 |
| 6  | -0.011234 | -1.203639 | -1.128258 |
| 7  | -0.021531 | -1.889314 | -0.000789 |
| 7  | -0.000864 | 2.298024  | 0.015849  |
| 1  | 0.175717  | 2.769200  | 0.896202  |
| 1  | 0.178006  | 2.808190  | -0.842995 |
| 9  | -0.012591 | -1.896422 | 2.274847  |
| 9  | 0.032171  | 0.859645  | 2.362300  |
| 9  | -0.020367 | -1.925292 | -2.263880 |
| 17 | 0.028606  | 1.014820  | -2.751093 |

py-04\_A\_rtpss

|   |           |           |           |
|---|-----------|-----------|-----------|
| 6 | -0.006088 | -1.193357 | 1.121945  |
| 6 | 0.005847  | 0.188829  | 1.176940  |
| 6 | 0.006504  | 0.936343  | -0.014717 |
| 6 | 0.003061  | 0.189545  | -1.214044 |
| 6 | -0.009223 | -1.199271 | -1.124486 |
| 7 | -0.016107 | -1.892696 | -0.000559 |
| 7 | -0.039454 | 2.302023  | 0.015959  |

|    |           |           |           |
|----|-----------|-----------|-----------|
| 1  | 0.201243  | 2.754964  | 0.890617  |
| 1  | 0.208821  | 2.796491  | -0.834565 |
| 9  | -0.005081 | -1.889621 | 2.271940  |
| 9  | 0.023974  | 0.861269  | 2.358641  |
| 9  | -0.012610 | -1.918646 | -2.260806 |
| 17 | 0.019832  | 1.013680  | -2.749507 |

py-04\_A\_tpssh

|    |           |           |           |
|----|-----------|-----------|-----------|
| 6  | -0.007152 | -1.191046 | 1.119799  |
| 6  | 0.011015  | 0.187588  | 1.175396  |
| 6  | 0.015380  | 0.933162  | -0.014383 |
| 6  | 0.008086  | 0.188387  | -1.211773 |
| 6  | -0.010387 | -1.197313 | -1.122193 |
| 7  | -0.019644 | -1.883690 | -0.000568 |
| 7  | -0.010858 | 2.292491  | 0.016135  |
| 1  | 0.181581  | 2.756516  | 0.890224  |
| 1  | 0.186423  | 2.797819  | -0.834368 |
| 9  | -0.010597 | -1.884731 | 2.262297  |
| 9  | 0.029651  | 0.855240  | 2.351245  |
| 9  | -0.018140 | -1.913981 | -2.251025 |
| 17 | 0.025362  | 1.009114  | -2.743427 |

py-04\_A\_wb97xd

|    |           |           |           |
|----|-----------|-----------|-----------|
| 6  | -0.008551 | -1.187445 | 1.115911  |
| 6  | 0.018319  | 0.186863  | 1.171592  |
| 6  | 0.028703  | 0.928774  | -0.015400 |
| 6  | 0.014931  | 0.186786  | -1.208188 |
| 6  | -0.012057 | -1.195231 | -1.118525 |
| 7  | -0.024545 | -1.875255 | -0.000476 |
| 7  | 0.030627  | 2.281330  | 0.017334  |
| 1  | 0.151954  | 2.755078  | 0.894765  |
| 1  | 0.156041  | 2.802241  | -0.832861 |
| 9  | -0.018226 | -1.873157 | 2.249717  |
| 9  | 0.037498  | 0.846136  | 2.339776  |
| 9  | -0.026081 | -1.906068 | -2.237430 |
| 17 | 0.032107  | 0.999502  | -2.738856 |

py-04\_A\_x31yp

|   |           |           |           |
|---|-----------|-----------|-----------|
| 6 | -0.008534 | -1.190364 | 1.119007  |
| 6 | 0.017600  | 0.186028  | 1.173156  |
| 6 | 0.027133  | 0.930841  | -0.015787 |
| 6 | 0.014112  | 0.185973  | -1.211565 |
| 6 | -0.012161 | -1.198077 | -1.121225 |
| 7 | -0.024350 | -1.878274 | -0.000091 |
| 7 | 0.025968  | 2.286340  | 0.018279  |
| 1 | 0.155259  | 2.758597  | 0.897044  |
| 1 | 0.159216  | 2.807483  | -0.832030 |

|    |           |           |           |
|----|-----------|-----------|-----------|
| 9  | -0.017304 | -1.879912 | 2.260516  |
| 9  | 0.037161  | 0.851393  | 2.347170  |
| 9  | -0.025497 | -1.913838 | -2.247288 |
| 17 | 0.032116  | 1.003364  | -2.749828 |

py-06\_A\_b31yp

|    |           |           |           |
|----|-----------|-----------|-----------|
| 6  | 0.004444  | -1.194176 | 1.103969  |
| 6  | -0.010818 | 0.189561  | 1.187501  |
| 6  | -0.003257 | 0.906402  | -0.010709 |
| 6  | 0.025273  | 0.191336  | -1.196625 |
| 6  | 0.045494  | -1.209956 | -1.178167 |
| 7  | 0.028758  | -1.870012 | -0.016387 |
| 9  | -0.011102 | -1.900455 | 2.240360  |
| 9  | -0.036715 | 0.817763  | 2.369310  |
| 9  | 0.028175  | 0.824494  | -2.387678 |
| 7  | 0.124734  | -1.929546 | -2.340244 |
| 17 | -0.030076 | 2.631115  | -0.010220 |
| 1  | -0.117784 | -1.472309 | -3.204184 |
| 1  | -0.082704 | -2.913234 | -2.268100 |

py-06\_A\_b3p86

|    |           |           |           |
|----|-----------|-----------|-----------|
| 6  | 0.004448  | -1.192236 | 1.100188  |
| 6  | -0.010931 | 0.188911  | 1.184674  |
| 6  | -0.003349 | 0.903687  | -0.011609 |
| 6  | 0.025389  | 0.190203  | -1.195763 |
| 6  | 0.045417  | -1.208271 | -1.175782 |
| 7  | 0.028785  | -1.866476 | -0.017705 |
| 9  | -0.010900 | -1.894583 | 2.230045  |
| 9  | -0.036792 | 0.813885  | 2.359424  |
| 9  | 0.028469  | 0.819836  | -2.379441 |
| 7  | 0.124179  | -1.924846 | -2.334224 |
| 17 | -0.030019 | 2.616512  | -0.011580 |
| 1  | -0.117903 | -1.467711 | -3.197463 |
| 1  | -0.082369 | -2.907926 | -2.261939 |

py-06\_A\_b3pw91

|    |           |           |           |
|----|-----------|-----------|-----------|
| 6  | 0.004397  | -1.192751 | 1.100927  |
| 6  | -0.011080 | 0.189806  | 1.186353  |
| 6  | -0.003344 | 0.905785  | -0.010990 |
| 6  | 0.025668  | 0.191877  | -1.196880 |
| 6  | 0.045797  | -1.208167 | -1.177208 |
| 7  | 0.028943  | -1.866743 | -0.018110 |
| 9  | -0.011086 | -1.897479 | 2.231330  |
| 9  | -0.037162 | 0.814567  | 2.362914  |
| 9  | 0.029107  | 0.823271  | -2.381311 |
| 7  | 0.125792  | -1.927243 | -2.336128 |
| 17 | -0.030018 | 2.620673  | -0.010391 |

|   |           |           |           |
|---|-----------|-----------|-----------|
| 1 | -0.120063 | -1.472591 | -3.199785 |
| 1 | -0.082527 | -2.910021 | -2.261895 |

py-06\_A\_blyp

|    |           |           |           |
|----|-----------|-----------|-----------|
| 6  | 0.004390  | -1.199633 | 1.114288  |
| 6  | -0.010618 | 0.195474  | 1.200732  |
| 6  | -0.003128 | 0.919928  | -0.006641 |
| 6  | 0.025734  | 0.197829  | -1.202512 |
| 6  | 0.046270  | -1.214860 | -1.187354 |
| 7  | 0.028676  | -1.882370 | -0.013994 |
| 9  | -0.012322 | -1.919324 | 2.267091  |
| 9  | -0.036673 | 0.831606  | 2.399206  |
| 9  | 0.028025  | 0.842663  | -2.410030 |
| 7  | 0.133681  | -1.943946 | -2.357524 |
| 17 | -0.030755 | 2.663616  | -0.005966 |
| 1  | -0.122528 | -1.487046 | -3.227081 |
| 1  | -0.086328 | -2.932953 | -2.281389 |

py-06\_A\_bp86

|    |           |           |           |
|----|-----------|-----------|-----------|
| 6  | 0.004757  | -1.198490 | 1.111413  |
| 6  | -0.011092 | 0.195085  | 1.198800  |
| 6  | -0.003205 | 0.917199  | -0.007950 |
| 6  | 0.027279  | 0.197048  | -1.203307 |
| 6  | 0.048433  | -1.213318 | -1.185245 |
| 7  | 0.030187  | -1.879989 | -0.015584 |
| 9  | -0.012439 | -1.913810 | 2.256579  |
| 9  | -0.038377 | 0.829005  | 2.388596  |
| 9  | 0.029953  | 0.838334  | -2.402031 |
| 7  | 0.138186  | -1.939178 | -2.352342 |
| 17 | -0.031993 | 2.646487  | -0.007657 |
| 1  | -0.127637 | -1.480380 | -3.218978 |
| 1  | -0.089627 | -2.927008 | -2.273468 |

py-06\_A\_bpw91

py-06\_A\_camb3lyp

|   |           |           |           |
|---|-----------|-----------|-----------|
| 6 | 0.003814  | -1.190391 | 1.099970  |
| 6 | -0.010107 | 0.187210  | 1.181155  |
| 6 | -0.003421 | 0.900918  | -0.011834 |
| 6 | 0.022081  | 0.187352  | -1.190876 |
| 6 | 0.040407  | -1.208716 | -1.172292 |
| 7 | 0.025836  | -1.864757 | -0.016012 |
| 9 | -0.009550 | -1.889755 | 2.231940  |
| 9 | -0.033306 | 0.812050  | 2.358115  |
| 9 | 0.024692  | 0.813941  | -2.378139 |
| 7 | 0.107274  | -1.922008 | -2.332177 |

|    |           |           |           |
|----|-----------|-----------|-----------|
| 17 | -0.027148 | 2.616588  | -0.012867 |
| 1  | -0.103577 | -1.461220 | -3.201066 |
| 1  | -0.072571 | -2.910227 | -2.267092 |

py-06\_A\_mn15

|    |           |           |           |
|----|-----------|-----------|-----------|
| 6  | 0.002932  | -1.191136 | 1.107899  |
| 6  | -0.008891 | 0.190869  | 1.188388  |
| 6  | -0.003566 | 0.902519  | -0.009965 |
| 6  | 0.017728  | 0.188723  | -1.193219 |
| 6  | 0.033059  | -1.211151 | -1.172656 |
| 7  | 0.021299  | -1.867533 | -0.012376 |
| 9  | -0.007873 | -1.884594 | 2.239793  |
| 9  | -0.028128 | 0.818028  | 2.360340  |
| 9  | 0.019626  | 0.814580  | -2.376799 |
| 7  | 0.086231  | -1.922454 | -2.336510 |
| 17 | -0.023536 | 2.609677  | -0.012541 |
| 1  | -0.084465 | -1.457581 | -3.214701 |
| 1  | -0.059991 | -2.918962 | -2.278830 |

py-06\_A\_o3lyp

|    |           |           |           |
|----|-----------|-----------|-----------|
| 6  | 0.004553  | -1.193956 | 1.101164  |
| 6  | -0.011798 | 0.192100  | 1.189758  |
| 6  | -0.003324 | 0.911491  | -0.009936 |
| 6  | 0.027664  | 0.195904  | -1.200195 |
| 6  | 0.048836  | -1.207587 | -1.180951 |
| 7  | 0.030578  | -1.867667 | -0.020117 |
| 9  | -0.012192 | -1.904421 | 2.231954  |
| 9  | -0.039586 | 0.814865  | 2.369713  |
| 9  | 0.032322  | 0.831444  | -2.384836 |
| 7  | 0.138716  | -1.932882 | -2.340631 |
| 17 | -0.031281 | 2.627992  | -0.007975 |
| 1  | -0.132505 | -1.485703 | -3.199828 |
| 1  | -0.087560 | -2.910598 | -2.259293 |

py-06\_A\_pbe0

|    |           |           |           |
|----|-----------|-----------|-----------|
| 6  | 0.004719  | -1.192044 | 1.099262  |
| 6  | -0.011300 | 0.188682  | 1.183915  |
| 6  | -0.003385 | 0.902758  | -0.012259 |
| 6  | 0.026449  | 0.189979  | -1.196324 |
| 6  | 0.047136  | -1.207912 | -1.174899 |
| 7  | 0.030027  | -1.865950 | -0.018252 |
| 9  | -0.011021 | -1.892818 | 2.226546  |
| 9  | -0.038179 | 0.812531  | 2.356219  |
| 9  | 0.029931  | 0.818307  | -2.377204 |
| 7  | 0.127851  | -1.923666 | -2.333110 |
| 17 | -0.030898 | 2.611861  | -0.012288 |
| 1  | -0.121897 | -1.465902 | -3.193376 |

|               |           |           |           |
|---------------|-----------|-----------|-----------|
| 1             | -0.085009 | -2.904841 | -2.259406 |
| py-06_A_pbe   |           |           |           |
| 6             | 0.004672  | -1.197554 | 1.109914  |
| 6             | -0.010865 | 0.194498  | 1.197055  |
| 6             | -0.003256 | 0.915458  | -0.008555 |
| 6             | 0.026541  | 0.195726  | -1.202379 |
| 6             | 0.047525  | -1.213151 | -1.183748 |
| 7             | 0.029629  | -1.878155 | -0.015586 |
| 9             | -0.012197 | -1.910933 | 2.253902  |
| 9             | -0.037601 | 0.827848  | 2.384585  |
| 9             | 0.028994  | 0.835693  | -2.399037 |
| 7             | 0.135179  | -1.936690 | -2.349422 |
| 17            | -0.031557 | 2.639613  | -0.008835 |
| 1             | -0.124243 | -1.476832 | -3.216221 |
| 1             | -0.088399 | -2.924538 | -2.272849 |
| py-06_A_rtpss |           |           |           |
| 6             | 0.005897  | -1.196065 | 1.105307  |
| 6             | -0.011995 | 0.192196  | 1.191894  |
| 6             | -0.003136 | 0.912497  | -0.010020 |
| 6             | 0.031698  | 0.192600  | -1.200052 |
| 6             | 0.055131  | -1.211599 | -1.182584 |
| 7             | 0.034796  | -1.882903 | -0.017466 |
| 9             | -0.013885 | -1.908131 | 2.249258  |
| 9             | -0.043384 | 0.825302  | 2.380304  |
| 9             | 0.034622  | 0.832931  | -2.397708 |
| 7             | 0.161307  | -1.935900 | -2.350971 |
| 17            | -0.036410 | 2.636626  | -0.011078 |
| 1             | -0.145789 | -1.474241 | -3.201058 |
| 1             | -0.104429 | -2.912326 | -2.267003 |
| py-06_A_tpssh |           |           |           |
| 6             | 0.004951  | -1.193995 | 1.103289  |
| 6             | -0.011342 | 0.190916  | 1.189090  |
| 6             | -0.003236 | 0.909063  | -0.010280 |
| 6             | 0.028013  | 0.192206  | -1.197901 |
| 6             | 0.049599  | -1.209641 | -1.179959 |
| 7             | 0.031202  | -1.874049 | -0.017576 |
| 9             | -0.012425 | -1.903265 | 2.239796  |
| 9             | -0.039467 | 0.820217  | 2.371681  |
| 9             | 0.030900  | 0.828405  | -2.389156 |
| 7             | 0.141935  | -1.932024 | -2.343222 |
| 17            | -0.032683 | 2.629273  | -0.010563 |
| 1             | -0.130679 | -1.474964 | -3.200601 |
| 1             | -0.092342 | -2.911156 | -2.265771 |

py-06\_A\_wb97xd

|    |           |           |           |
|----|-----------|-----------|-----------|
| 6  | 0.004247  | -1.191807 | 1.099798  |
| 6  | -0.011374 | 0.188698  | 1.183501  |
| 6  | -0.003344 | 0.903921  | -0.011372 |
| 6  | 0.025843  | 0.191248  | -1.194721 |
| 6  | 0.045831  | -1.207122 | -1.174713 |
| 7  | 0.029182  | -1.866259 | -0.018704 |
| 9  | -0.010914 | -1.893972 | 2.226856  |
| 9  | -0.037629 | 0.810538  | 2.358800  |
| 9  | 0.029899  | 0.819140  | -2.377893 |
| 7  | 0.123902  | -1.925406 | -2.334607 |
| 17 | -0.029533 | 2.621306  | -0.010583 |
| 1  | -0.121411 | -1.471314 | -3.197703 |
| 1  | -0.080275 | -2.907986 | -2.259836 |

py-06\_A\_x31yp

|    |           |           |           |
|----|-----------|-----------|-----------|
| 6  | 0.004225  | -1.193552 | 1.103417  |
| 6  | -0.010635 | 0.189659  | 1.187098  |
| 6  | -0.003314 | 0.906673  | -0.010362 |
| 6  | 0.024375  | 0.191104  | -1.195483 |
| 6  | 0.044033  | -1.210070 | -1.177409 |
| 7  | 0.027840  | -1.869411 | -0.016148 |
| 9  | -0.010795 | -1.898569 | 2.239048  |
| 9  | -0.035754 | 0.816103  | 2.368648  |
| 9  | 0.027322  | 0.822973  | -2.386028 |
| 7  | 0.121486  | -1.929139 | -2.339437 |
| 17 | -0.029240 | 2.631560  | -0.010211 |
| 1  | -0.114849 | -1.472407 | -3.205116 |
| 1  | -0.080270 | -2.913941 | -2.269192 |

py-08\_A\_b31yp

|   |           |           |           |
|---|-----------|-----------|-----------|
| 6 | 0.005165  | -1.199319 | 1.106567  |
| 6 | -0.013010 | 0.185759  | 1.178394  |
| 6 | -0.006352 | 0.903261  | -0.010199 |
| 6 | 0.024559  | 0.187314  | -1.186221 |
| 6 | 0.048341  | -1.215252 | -1.179532 |
| 7 | 0.031942  | -1.872486 | -0.016524 |
| 9 | -0.010147 | -1.909919 | 2.241904  |
| 9 | -0.041629 | 0.821077  | 2.364707  |
| 9 | 0.025551  | 0.826532  | -2.382961 |
| 7 | 0.132539  | -1.935959 | -2.342985 |
| 1 | -0.123754 | -1.477301 | -3.202399 |
| 1 | -0.084161 | -2.917741 | -2.270680 |
| 1 | -0.025184 | 1.985020  | -0.011248 |

py-08\_A\_b3p86



|   |           |           |           |
|---|-----------|-----------|-----------|
| 6 | 0.005169  | -1.198086 | 1.102879  |
| 6 | -0.013087 | 0.184490  | 1.175869  |
| 6 | -0.006430 | 0.899094  | -0.011027 |
| 6 | 0.024695  | 0.185727  | -1.185596 |
| 6 | 0.048310  | -1.214157 | -1.177356 |
| 7 | 0.031982  | -1.869301 | -0.017918 |
| 9 | -0.009973 | -1.905283 | 2.231348  |
| 9 | -0.041611 | 0.815442  | 2.355343  |
| 9 | 0.025760  | 0.820289  | -2.375139 |
| 7 | 0.132006  | -1.932070 | -2.336986 |
| 1 | -0.123639 | -1.473419 | -3.195703 |
| 1 | -0.084013 | -2.913191 | -2.264528 |
| 1 | -0.025308 | 1.981450  | -0.012360 |

py-08\_A\_b3pw91

|   |           |           |           |
|---|-----------|-----------|-----------|
| 6 | 0.005100  | -1.198647 | 1.103777  |
| 6 | -0.013246 | 0.185335  | 1.177691  |
| 6 | -0.006395 | 0.900573  | -0.010305 |
| 6 | 0.024989  | 0.187476  | -1.186730 |
| 6 | 0.048656  | -1.213954 | -1.179006 |
| 7 | 0.032103  | -1.869320 | -0.018392 |
| 9 | -0.010152 | -1.908522 | 2.232600  |
| 9 | -0.042005 | 0.817566  | 2.358285  |
| 9 | 0.026407  | 0.825501  | -2.376211 |
| 7 | 0.133507  | -1.934567 | -2.338984 |
| 1 | -0.125863 | -1.478628 | -3.198209 |
| 1 | -0.084006 | -2.915422 | -2.264381 |
| 1 | -0.025234 | 1.983594  | -0.011311 |

py-08\_A\_blyp

|   |           |           |           |
|---|-----------|-----------|-----------|
| 6 | 0.005073  | -1.204250 | 1.117502  |
| 6 | -0.012658 | 0.192337  | 1.190861  |
| 6 | -0.006217 | 0.916710  | -0.006192 |
| 6 | 0.024593  | 0.194249  | -1.191167 |
| 6 | 0.048331  | -1.219809 | -1.188752 |
| 7 | 0.031367  | -1.884063 | -0.013789 |
| 9 | -0.011167 | -1.928236 | 2.269050  |
| 9 | -0.041321 | 0.838862  | 2.392798  |
| 9 | 0.024787  | 0.847909  | -2.403690 |
| 7 | 0.139849  | -1.949575 | -2.360085 |
| 1 | -0.126973 | -1.490795 | -3.225647 |
| 1 | -0.086544 | -2.937277 | -2.284846 |
| 1 | -0.025257 | 2.004923  | -0.007219 |

py-08\_A\_bp86

|   |           |           |          |
|---|-----------|-----------|----------|
| 6 | 0.005439  | -1.204128 | 1.114482 |
| 6 | -0.013140 | 0.191170  | 1.188890 |

|   |           |           |           |
|---|-----------|-----------|-----------|
| 6 | -0.006448 | 0.913114  | -0.007433 |
| 6 | 0.025933  | 0.192802  | -1.191845 |
| 6 | 0.050412  | -1.219252 | -1.186583 |
| 7 | 0.032870  | -1.882600 | -0.015415 |
| 9 | -0.011219 | -1.923908 | 2.258265  |
| 9 | -0.042881 | 0.832600  | 2.383287  |
| 9 | 0.026274  | 0.839950  | -2.396732 |
| 7 | 0.144056  | -1.945654 | -2.354815 |
| 1 | -0.131389 | -1.484656 | -3.217446 |
| 1 | -0.089663 | -2.932252 | -2.277179 |
| 1 | -0.026385 | 2.003798  | -0.008648 |

py-08\_A\_bpw91

py-08\_A\_camb3lyp

|   |           |           |           |
|---|-----------|-----------|-----------|
| 6 | 0.004608  | -1.195823 | 1.102193  |
| 6 | -0.012355 | 0.182944  | 1.172645  |
| 6 | -0.006241 | 0.897378  | -0.011380 |
| 6 | 0.022206  | 0.183055  | -1.181383 |
| 6 | 0.044384  | -1.214133 | -1.173751 |
| 7 | 0.029631  | -1.867681 | -0.016469 |
| 9 | -0.008991 | -1.899786 | 2.233126  |
| 9 | -0.038622 | 0.813023  | 2.354694  |
| 9 | 0.023220  | 0.814071  | -2.374757 |
| 7 | 0.117626  | -1.929119 | -2.335137 |
| 1 | -0.111900 | -1.467237 | -3.198923 |
| 1 | -0.076223 | -2.914732 | -2.268837 |
| 1 | -0.023480 | 1.979024  | -0.013197 |

py-08\_A\_mn15

|   |           |           |           |
|---|-----------|-----------|-----------|
| 6 | 0.003856  | -1.196592 | 1.109712  |
| 6 | -0.011117 | 0.186716  | 1.179987  |
| 6 | -0.006011 | 0.899961  | -0.009705 |
| 6 | 0.018835  | 0.184495  | -1.184143 |
| 6 | 0.038403  | -1.216747 | -1.173856 |
| 7 | 0.025823  | -1.870669 | -0.012876 |
| 9 | -0.007839 | -1.894515 | 2.240700  |
| 9 | -0.033932 | 0.813242  | 2.359589  |
| 9 | 0.019388  | 0.808878  | -2.376373 |
| 7 | 0.099906  | -1.929691 | -2.339398 |
| 1 | -0.095620 | -1.463132 | -3.211752 |
| 1 | -0.066455 | -2.923107 | -2.280387 |
| 1 | -0.021375 | 1.982145  | -0.012674 |

py-08\_A\_o3lyp

|   |          |           |          |
|---|----------|-----------|----------|
| 6 | 0.005199 | -1.200193 | 1.104646 |
|---|----------|-----------|----------|

|   |           |           |           |
|---|-----------|-----------|-----------|
| 6 | -0.014008 | 0.187394  | 1.181232  |
| 6 | -0.006378 | 0.903869  | -0.008977 |
| 6 | 0.026701  | 0.191536  | -1.189783 |
| 6 | 0.051194  | -1.213427 | -1.183351 |
| 7 | 0.033451  | -1.869699 | -0.020444 |
| 9 | -0.011050 | -1.916506 | 2.233334  |
| 9 | -0.044419 | 0.822219  | 2.363118  |
| 9 | 0.029265  | 0.838679  | -2.377100 |
| 7 | 0.145217  | -1.940525 | -2.343688 |
| 1 | -0.137680 | -1.492503 | -3.198891 |
| 1 | -0.087766 | -2.916732 | -2.261980 |
| 1 | -0.025865 | 1.986872  | -0.009291 |

py-08\_A\_pbe0

|   |           |           |           |
|---|-----------|-----------|-----------|
| 6 | 0.005449  | -1.198165 | 1.101758  |
| 6 | -0.013532 | 0.184044  | 1.175095  |
| 6 | -0.006563 | 0.898215  | -0.011633 |
| 6 | 0.025682  | 0.185395  | -1.186165 |
| 6 | 0.050045  | -1.213999 | -1.176464 |
| 7 | 0.033282  | -1.869075 | -0.018573 |
| 9 | -0.010031 | -1.903754 | 2.227695  |
| 9 | -0.043076 | 0.812763  | 2.352616  |
| 9 | 0.027159  | 0.817772  | -2.373268 |
| 7 | 0.135643  | -1.931135 | -2.335886 |
| 1 | -0.127688 | -1.472060 | -3.191598 |
| 1 | -0.086462 | -2.910330 | -2.261801 |
| 1 | -0.026048 | 1.981313  | -0.012951 |

py-08\_A\_pbe

|   |           |           |           |
|---|-----------|-----------|-----------|
| 6 | 0.005363  | -1.203379 | 1.112920  |
| 6 | -0.012887 | 0.190480  | 1.187251  |
| 6 | -0.006424 | 0.910859  | -0.008066 |
| 6 | 0.025228  | 0.191396  | -1.191093 |
| 6 | 0.049517  | -1.219299 | -1.185064 |
| 7 | 0.032300  | -1.880942 | -0.015428 |
| 9 | -0.011005 | -1.921186 | 2.255515  |
| 9 | -0.042053 | 0.830296  | 2.379782  |
| 9 | 0.025423  | 0.836192  | -2.394297 |
| 7 | 0.141030  | -1.943366 | -2.351828 |
| 1 | -0.127963 | -1.481283 | -3.214683 |
| 1 | -0.088528 | -2.929985 | -2.276535 |
| 1 | -0.026138 | 2.001201  | -0.009649 |

py-08\_A\_rtpss

|   |           |           |           |
|---|-----------|-----------|-----------|
| 6 | 0.006670  | -1.201599 | 1.107783  |
| 6 | -0.014305 | 0.188244  | 1.181372  |
| 6 | -0.007022 | 0.911887  | -0.009729 |

|   |           |           |           |
|---|-----------|-----------|-----------|
| 6 | 0.029895  | 0.188122  | -1.188281 |
| 6 | 0.056910  | -1.217531 | -1.183436 |
| 7 | 0.037650  | -1.886024 | -0.017261 |
| 9 | -0.012250 | -1.917622 | 2.250736  |
| 9 | -0.048219 | 0.824987  | 2.376820  |
| 9 | 0.030323  | 0.830530  | -2.394598 |
| 7 | 0.166601  | -1.942109 | -2.353188 |
| 1 | -0.149003 | -1.478383 | -3.199220 |
| 1 | -0.103557 | -2.917487 | -2.270381 |
| 1 | -0.029831 | 1.997971  | -0.011791 |

py-08\_A\_tpssh

|   |           |           |           |
|---|-----------|-----------|-----------|
| 6 | 0.005679  | -1.199483 | 1.105948  |
| 6 | -0.013572 | 0.186892  | 1.179501  |
| 6 | -0.006644 | 0.906560  | -0.009802 |
| 6 | 0.026836  | 0.187964  | -1.187006 |
| 6 | 0.051942  | -1.215234 | -1.181341 |
| 7 | 0.034204  | -1.876659 | -0.017662 |
| 9 | -0.011179 | -1.913475 | 2.241120  |
| 9 | -0.044303 | 0.821851  | 2.367670  |
| 9 | 0.027523  | 0.828693  | -2.385121 |
| 7 | 0.148526  | -1.938748 | -2.345797 |
| 1 | -0.135317 | -1.480171 | -3.198922 |
| 1 | -0.092755 | -2.916281 | -2.268485 |
| 1 | -0.027081 | 1.989077  | -0.011279 |

py-08\_A\_wb97xd

|   |           |           |           |
|---|-----------|-----------|-----------|
| 6 | 0.004982  | -1.197556 | 1.102249  |
| 6 | -0.013707 | 0.184089  | 1.174856  |
| 6 | -0.006415 | 0.899798  | -0.010675 |
| 6 | 0.025550  | 0.186877  | -1.184811 |
| 6 | 0.049348  | -1.212526 | -1.176556 |
| 7 | 0.032795  | -1.869105 | -0.019274 |
| 9 | -0.010122 | -1.904855 | 2.227999  |
| 9 | -0.042863 | 0.813794  | 2.353862  |
| 9 | 0.027714  | 0.822067  | -2.372549 |
| 7 | 0.133092  | -1.932789 | -2.337747 |
| 1 | -0.128758 | -1.477868 | -3.195795 |
| 1 | -0.082730 | -2.912926 | -2.261507 |
| 1 | -0.025026 | 1.981985  | -0.011227 |

py-08\_A\_x31yp

|   |           |           |           |
|---|-----------|-----------|-----------|
| 6 | 0.004943  | -1.198592 | 1.106168  |
| 6 | -0.012809 | 0.185842  | 1.178371  |
| 6 | -0.006302 | 0.903034  | -0.009836 |
| 6 | 0.023838  | 0.187148  | -1.185478 |
| 6 | 0.047040  | -1.215174 | -1.178996 |

|   |           |           |           |
|---|-----------|-----------|-----------|
| 7 | 0.031081  | -1.871556 | -0.016350 |
| 9 | -0.009927 | -1.908350 | 2.240542  |
| 9 | -0.040693 | 0.819912  | 2.363995  |
| 9 | 0.024940  | 0.825667  | -2.381218 |
| 7 | 0.129683  | -1.935727 | -2.342280 |
| 1 | -0.121195 | -1.477741 | -3.203416 |
| 1 | -0.082126 | -2.918489 | -2.271559 |
| 1 | -0.024613 | 1.985012  | -0.011117 |

py-10\_A\_b3lyp

|    |           |           |           |
|----|-----------|-----------|-----------|
| 6  | -0.011520 | -1.190750 | 1.119587  |
| 6  | 0.020615  | 0.191029  | 1.200034  |
| 6  | 0.036036  | 0.934775  | -0.000000 |
| 6  | 0.020615  | 0.191029  | -1.200034 |
| 6  | -0.011520 | -1.190750 | -1.119587 |
| 7  | -0.028065 | -1.877239 | 0.000000  |
| 7  | 0.051330  | 2.286493  | -0.000000 |
| 1  | 0.135349  | 2.788107  | 0.867801  |
| 1  | 0.135349  | 2.788107  | -0.867801 |
| 9  | -0.026836 | -1.902522 | 2.248356  |
| 9  | -0.026836 | -1.902522 | -2.248356 |
| 17 | 0.042472  | 1.012539  | -2.737333 |
| 17 | 0.042472  | 1.012539  | 2.737333  |

py-10\_A\_b3p86

|    |           |           |           |
|----|-----------|-----------|-----------|
| 6  | -0.011902 | -1.187344 | 1.116051  |
| 6  | 0.022480  | 0.191918  | 1.197684  |
| 6  | 0.039494  | 0.932959  | -0.000000 |
| 6  | 0.022480  | 0.191918  | -1.197684 |
| 6  | -0.011902 | -1.187344 | -1.116051 |
| 7  | -0.029437 | -1.873211 | 0.000000  |
| 7  | 0.061060  | 2.279538  | -0.000000 |
| 1  | 0.127417  | 2.781581  | 0.868789  |
| 1  | 0.127417  | 2.781581  | -0.868789 |
| 9  | -0.028611 | -1.894048 | 2.239157  |
| 9  | -0.028611 | -1.894048 | -2.239157 |
| 17 | 0.044789  | 1.008669  | -2.722555 |
| 17 | 0.044789  | 1.008669  | 2.722555  |

py-10\_A\_b3pw91

|   |           |           |           |
|---|-----------|-----------|-----------|
| 6 | -0.011872 | -1.188560 | 1.117010  |
| 6 | 0.022301  | 0.192190  | 1.199187  |
| 6 | 0.039137  | 0.934262  | -0.000000 |
| 6 | 0.022301  | 0.192190  | -1.199187 |
| 6 | -0.011872 | -1.188560 | -1.117010 |
| 7 | -0.029299 | -1.874648 | 0.000000  |
| 7 | 0.059951  | 2.282274  | -0.000000 |

|    |           |           |           |
|----|-----------|-----------|-----------|
| 1  | 0.128453  | 2.784921  | 0.868239  |
| 1  | 0.128453  | 2.784921  | -0.868239 |
| 9  | -0.028488 | -1.897478 | 2.240618  |
| 9  | -0.028488 | -1.897478 | -2.240618 |
| 17 | 0.044442  | 1.008403  | -2.726708 |
| 17 | 0.044442  | 1.008403  | 2.726708  |

py-10\_A\_blyp

|    |           |           |           |
|----|-----------|-----------|-----------|
| 6  | -0.010714 | -1.201226 | 1.128569  |
| 6  | 0.015695  | 0.191011  | 1.209878  |
| 6  | 0.026609  | 0.942163  | -0.000000 |
| 6  | 0.015695  | 0.191011  | -1.209878 |
| 6  | -0.010714 | -1.201226 | -1.128569 |
| 7  | -0.025055 | -1.894278 | 0.000000  |
| 7  | 0.022652  | 2.307133  | -0.000000 |
| 1  | 0.157246  | 2.806605  | 0.872249  |
| 1  | 0.157246  | 2.806605  | -0.872249 |
| 9  | -0.021988 | -1.927593 | 2.272944  |
| 9  | -0.021988 | -1.927593 | -2.272944 |
| 17 | 0.037390  | 1.024114  | -2.765859 |
| 17 | 0.037390  | 1.024114  | 2.765859  |

py-10\_A\_bp86

|    |           |           |           |
|----|-----------|-----------|-----------|
| 6  | -0.010378 | -1.198556 | 1.126396  |
| 6  | 0.014740  | 0.192503  | 1.207904  |
| 6  | 0.024549  | 0.940572  | -0.000000 |
| 6  | 0.014740  | 0.192503  | -1.207904 |
| 6  | -0.010378 | -1.198556 | -1.126396 |
| 7  | -0.024235 | -1.891261 | 0.000000  |
| 7  | 0.017710  | 2.300691  | -0.000000 |
| 1  | 0.160803  | 2.796818  | 0.874370  |
| 1  | 0.160803  | 2.796818  | -0.874370 |
| 9  | -0.020639 | -1.918322 | 2.264559  |
| 9  | -0.020639 | -1.918322 | -2.264559 |
| 17 | 0.036193  | 1.022975  | -2.746730 |
| 17 | 0.036193  | 1.022975  | 2.746730  |

py-10\_A\_bpw91

py-10\_A\_camb3lyp

|   |           |           |           |
|---|-----------|-----------|-----------|
| 6 | -0.013381 | -1.185312 | 1.113890  |
| 6 | 0.027674  | 0.190813  | 1.195369  |
| 6 | 0.049741  | 0.930502  | -0.000000 |
| 6 | 0.027674  | 0.190813  | -1.195369 |
| 6 | -0.013381 | -1.185312 | -1.113890 |
| 7 | -0.033817 | -1.870287 | 0.000000  |

|    |           |           |           |
|----|-----------|-----------|-----------|
| 7  | 0.089919  | 2.277287  | -0.000000 |
| 1  | 0.105035  | 2.783738  | 0.868051  |
| 1  | 0.105035  | 2.783738  | -0.868051 |
| 9  | -0.034421 | -1.890495 | 2.238227  |
| 9  | -0.034421 | -1.890495 | -2.238227 |
| 17 | 0.051902  | 1.002925  | -2.725559 |
| 17 | 0.051902  | 1.002925  | 2.725559  |

py-10\_A\_mn15

|    |           |           |           |
|----|-----------|-----------|-----------|
| 6  | -0.013500 | -1.190012 | 1.117362  |
| 6  | 0.027663  | 0.190420  | 1.197439  |
| 6  | 0.049755  | 0.931289  | -0.000000 |
| 6  | 0.027663  | 0.190420  | -1.197439 |
| 6  | -0.013500 | -1.190012 | -1.117362 |
| 7  | -0.034007 | -1.877699 | 0.000000  |
| 7  | 0.090051  | 2.282607  | -0.000000 |
| 1  | 0.105209  | 2.790947  | 0.871080  |
| 1  | 0.105209  | 2.790947  | -0.871080 |
| 9  | -0.034302 | -1.887583 | 2.243294  |
| 9  | -0.034302 | -1.887583 | -2.243294 |
| 17 | 0.051761  | 0.998549  | -2.718800 |
| 17 | 0.051761  | 0.998549  | 2.718800  |

py-10\_A\_o3lyp

|    |           |           |           |
|----|-----------|-----------|-----------|
| 6  | 1.211540  | -0.000841 | 1.119117  |
| 6  | -0.173274 | -0.001379 | 1.202850  |
| 6  | -0.917465 | -0.004762 | -0.000000 |
| 6  | -0.173274 | -0.001379 | -1.202850 |
| 6  | 1.211540  | -0.000841 | -1.119117 |
| 7  | 1.898339  | -0.001592 | 0.000000  |
| 7  | -2.269802 | -0.034567 | -0.000000 |
| 1  | -2.768615 | 0.090722  | 0.862625  |
| 1  | -2.768615 | 0.090722  | -0.862625 |
| 9  | 1.926897  | 0.001569  | 2.242336  |
| 9  | 1.926897  | 0.001569  | -2.242336 |
| 17 | -0.985334 | 0.002895  | -2.734739 |
| 17 | -0.985334 | 0.002895  | 2.734739  |

py-10\_A\_pbe0

|   |           |           |           |
|---|-----------|-----------|-----------|
| 6 | -0.011686 | -1.186649 | 1.115463  |
| 6 | 0.021824  | 0.192590  | 1.197251  |
| 6 | 0.038238  | 0.933216  | -0.000000 |
| 6 | 0.021824  | 0.192590  | -1.197251 |
| 6 | -0.011686 | -1.186649 | -1.115463 |
| 7 | -0.028833 | -1.872488 | 0.000000  |
| 7 | 0.057619  | 2.278625  | -0.000000 |
| 1 | 0.130137  | 2.779532  | 0.868192  |

|    |           |           |           |
|----|-----------|-----------|-----------|
| 1  | 0.130137  | 2.779532  | -0.868192 |
| 9  | -0.027804 | -1.891112 | 2.236212  |
| 9  | -0.027804 | -1.891112 | -2.236212 |
| 17 | 0.043747  | 1.006381  | -2.718695 |
| 17 | 0.043747  | 1.006381  | 2.718695  |

py-10\_A\_pbe

|    |           |           |           |
|----|-----------|-----------|-----------|
| 6  | -0.013705 | -1.197475 | 1.124795  |
| 6  | 0.027700  | 0.191675  | 1.206805  |
| 6  | 0.049969  | 0.938792  | -0.000000 |
| 6  | 0.027700  | 0.191675  | -1.206805 |
| 6  | -0.013705 | -1.197475 | -1.124795 |
| 7  | -0.034320 | -1.889140 | 0.000000  |
| 7  | 0.090349  | 2.293627  | -0.000000 |
| 1  | 0.105487  | 2.801253  | 0.877151  |
| 1  | 0.105487  | 2.801253  | -0.877151 |
| 9  | -0.035091 | -1.915005 | 2.261932  |
| 9  | -0.035091 | -1.915005 | -2.261932 |
| 17 | 0.052340  | 1.018332  | -2.741211 |
| 17 | 0.052340  | 1.018332  | 2.741211  |

py-10\_A\_rtpss

|    |           |           |           |
|----|-----------|-----------|-----------|
| 6  | -0.008414 | -1.192457 | 1.120998  |
| 6  | 0.008043  | 0.194066  | 1.202601  |
| 6  | 0.012291  | 0.940222  | -0.000000 |
| 6  | 0.008043  | 0.194066  | -1.202601 |
| 6  | -0.008414 | -1.192457 | -1.120998 |
| 7  | -0.018618 | -1.892415 | 0.000000  |
| 7  | -0.021424 | 2.301475  | -0.000000 |
| 1  | 0.189994  | 2.782828  | 0.867112  |
| 1  | 0.189994  | 2.782828  | -0.867112 |
| 9  | -0.012796 | -1.907322 | 2.259050  |
| 9  | -0.012796 | -1.907322 | -2.259050 |
| 17 | 0.026778  | 1.018665  | -2.738861 |
| 17 | 0.026778  | 1.018665  | 2.738861  |

py-10\_A\_tpssh

|   |           |           |           |
|---|-----------|-----------|-----------|
| 6 | -0.009918 | -1.190530 | 1.118942  |
| 6 | 0.014502  | 0.192637  | 1.200830  |
| 6 | 0.024099  | 0.936826  | -0.000000 |
| 6 | 0.014502  | 0.192637  | -1.200830 |
| 6 | -0.009918 | -1.190530 | -1.118942 |
| 7 | -0.023361 | -1.883379 | 0.000000  |
| 7 | 0.015135  | 2.291377  | -0.000000 |
| 1 | 0.162400  | 2.784492  | 0.866925  |
| 1 | 0.162400  | 2.784492  | -0.866925 |
| 9 | -0.019888 | -1.902930 | 2.249299  |



|    |           |           |           |
|----|-----------|-----------|-----------|
| 9  | -0.019888 | -1.902930 | -2.249299 |
| 17 | 0.034699  | 1.014338  | -2.733051 |
| 17 | 0.034699  | 1.014338  | 2.733051  |

py-10\_A\_wb97xd

|    |           |           |           |
|----|-----------|-----------|-----------|
| 6  | -1.209774 | -0.000035 | 1.115254  |
| 6  | 0.169683  | 0.000126  | 1.197046  |
| 6  | 0.911079  | 0.000212  | 0.000000  |
| 6  | 0.169683  | 0.000126  | -1.197046 |
| 6  | -1.209774 | -0.000035 | -1.115254 |
| 7  | -1.897070 | -0.000115 | -0.000000 |
| 7  | 2.259349  | 0.000369  | 0.000000  |
| 1  | 2.766424  | 0.000429  | 0.867137  |
| 1  | 2.766424  | 0.000429  | -0.867137 |
| 9  | -1.916350 | -0.000117 | 2.235561  |
| 9  | -1.916350 | -0.000117 | -2.235561 |
| 17 | 0.983533  | 0.000220  | -2.728344 |
| 17 | 0.983533  | 0.000220  | 2.728344  |

py-10\_A\_x31yp

|    |           |           |           |
|----|-----------|-----------|-----------|
| 6  | -0.012180 | -1.190372 | 1.118238  |
| 6  | 0.023105  | 0.190777  | 1.199867  |
| 6  | 0.040918  | 0.934776  | -0.000000 |
| 6  | 0.023105  | 0.190777  | -1.199867 |
| 6  | -0.012180 | -1.190372 | -1.118238 |
| 7  | -0.030091 | -1.877227 | 0.000000  |
| 7  | 0.064763  | 2.286069  | -0.000000 |
| 1  | 0.124918  | 2.790656  | 0.867884  |
| 1  | 0.124918  | 2.790656  | -0.867884 |
| 9  | -0.029579 | -1.901518 | 2.246017  |
| 9  | -0.029579 | -1.901518 | -2.246017 |
| 17 | 0.045672  | 1.009068  | -2.739000 |
| 17 | 0.045672  | 1.009068  | 2.739000  |

py-14\_A\_b31yp

|   |           |           |           |
|---|-----------|-----------|-----------|
| 6 | 0.000365  | -1.195764 | 1.121960  |
| 6 | -0.012915 | 0.189579  | 1.189190  |
| 6 | -0.020757 | 0.906842  | -0.009375 |
| 6 | -0.014568 | 0.167273  | -1.193583 |
| 6 | -0.001222 | -1.214183 | -1.128775 |
| 7 | 0.006059  | -1.878778 | 0.000972  |
| 9 | 0.007928  | -1.888840 | 2.260816  |
| 9 | -0.018204 | 0.834517  | 2.358735  |
| 9 | 0.004643  | -1.916103 | -2.262750 |
| 9 | -0.021963 | 0.840453  | -2.363145 |
| 8 | -0.033643 | 2.247637  | 0.012665  |
| 1 | -0.037638 | 2.589065  | -0.891640 |

py-14\_A\_b3p86

|   |           |           |           |
|---|-----------|-----------|-----------|
| 6 | 0.000334  | -1.192817 | 1.118655  |
| 6 | -0.012919 | 0.189927  | 1.187827  |
| 6 | -0.020742 | 0.905321  | -0.008474 |
| 6 | -0.014575 | 0.168194  | -1.190865 |
| 6 | -0.001254 | -1.210670 | -1.126225 |
| 7 | 0.006012  | -1.873967 | 0.000505  |
| 9 | 0.007858  | -1.882387 | 2.251176  |
| 9 | -0.018172 | 0.830548  | 2.351152  |
| 9 | 0.004576  | -1.908443 | -2.254158 |
| 9 | -0.021951 | 0.840057  | -2.352266 |
| 8 | -0.033572 | 2.240143  | 0.011421  |
| 1 | -0.037512 | 2.575791  | -0.893679 |

py-14\_A\_b3pw91

|   |           |           |           |
|---|-----------|-----------|-----------|
| 6 | 0.000344  | -1.193754 | 1.119607  |
| 6 | -0.012923 | 0.190382  | 1.188739  |
| 6 | -0.020755 | 0.906672  | -0.008960 |
| 6 | -0.014578 | 0.168411  | -1.192533 |
| 6 | -0.001243 | -1.211916 | -1.127043 |
| 7 | 0.006027  | -1.875440 | 0.000635  |
| 9 | 0.007885  | -1.885026 | 2.253048  |
| 9 | -0.018181 | 0.831717  | 2.353502  |
| 9 | 0.004607  | -1.911716 | -2.255697 |
| 9 | -0.021948 | 0.839365  | -2.356263 |
| 8 | -0.033599 | 2.242998  | 0.012205  |
| 1 | -0.037551 | 2.580005  | -0.892170 |

py-14\_A\_blyp

|   |           |           |           |
|---|-----------|-----------|-----------|
| 6 | 0.000463  | -1.205206 | 1.131670  |
| 6 | -0.012921 | 0.191179  | 1.200183  |
| 6 | -0.020838 | 0.915341  | -0.008555 |
| 6 | -0.014586 | 0.168479  | -1.202305 |
| 6 | -0.001139 | -1.223604 | -1.137533 |
| 7 | 0.006213  | -1.894737 | 0.001509  |
| 9 | 0.008166  | -1.911598 | 2.286098  |
| 9 | -0.018302 | 0.846788  | 2.384693  |
| 9 | 0.004844  | -1.938978 | -2.287140 |
| 9 | -0.022117 | 0.854389  | -2.387628 |
| 8 | -0.033874 | 2.271906  | 0.015887  |
| 1 | -0.037825 | 2.607739  | -0.901811 |

py-14\_A\_bp86

|   |           |           |          |
|---|-----------|-----------|----------|
| 6 | 0.000440  | -1.202898 | 1.129376 |
| 6 | -0.012929 | 0.192026  | 1.200366 |

|   |           |           |           |
|---|-----------|-----------|-----------|
| 6 | -0.020828 | 0.914394  | -0.006910 |
| 6 | -0.014603 | 0.170298  | -1.200106 |
| 6 | -0.001172 | -1.220246 | -1.136055 |
| 7 | 0.006175  | -1.890820 | 0.000897  |
| 9 | 0.008101  | -1.905589 | 2.276471  |
| 9 | -0.018274 | 0.843322  | 2.377843  |
| 9 | 0.004772  | -1.930715 | -2.278924 |
| 9 | -0.022123 | 0.856106  | -2.375725 |
| 8 | -0.033806 | 2.264749  | 0.014414  |
| 1 | -0.037669 | 2.591072  | -0.906576 |

py-14\_A\_bpw91

|   |           |           |           |
|---|-----------|-----------|-----------|
| 6 | 0.000426  | -1.201654 | 1.128248  |
| 6 | -0.012930 | 0.192015  | 1.198940  |
| 6 | -0.020822 | 0.913798  | -0.007486 |
| 6 | -0.014601 | 0.170158  | -1.199675 |
| 6 | -0.001179 | -1.219223 | -1.135043 |
| 7 | 0.006150  | -1.888252 | 0.000885  |
| 9 | 0.008090  | -1.904663 | 2.274301  |
| 9 | -0.018271 | 0.842825  | 2.375614  |
| 9 | 0.004769  | -1.930302 | -2.276692 |
| 9 | -0.022101 | 0.853810  | -2.375265 |
| 8 | -0.033788 | 2.262915  | 0.014638  |
| 1 | -0.037659 | 2.590271  | -0.903397 |

py-14\_A\_camb31yp

|   |           |           |           |
|---|-----------|-----------|-----------|
| 6 | 0.000321  | -1.191725 | 1.116941  |
| 6 | -0.012904 | 0.187996  | 1.183780  |
| 6 | -0.020714 | 0.902378  | -0.009121 |
| 6 | -0.014553 | 0.166153  | -1.188022 |
| 6 | -0.001258 | -1.209963 | -1.123867 |
| 7 | 0.005996  | -1.872282 | 0.000766  |
| 9 | 0.007820  | -1.878421 | 2.251453  |
| 9 | -0.018148 | 0.827869  | 2.349056  |
| 9 | 0.004543  | -1.904946 | -2.253815 |
| 9 | -0.021904 | 0.835119  | -2.352091 |
| 8 | -0.033543 | 2.237115  | 0.010746  |
| 1 | -0.037573 | 2.582405  | -0.890755 |

py-14\_A\_mn15

|   |           |           |           |
|---|-----------|-----------|-----------|
| 6 | 0.000362  | -1.195487 | 1.121260  |
| 6 | -0.012905 | 0.188582  | 1.189056  |
| 6 | -0.020720 | 0.903108  | -0.007750 |
| 6 | -0.014561 | 0.166795  | -1.190958 |
| 6 | -0.001229 | -1.213493 | -1.128192 |
| 7 | 0.006042  | -1.877033 | 0.000845  |
| 9 | 0.007810  | -1.877105 | 2.255503  |

|   |           |           |           |
|---|-----------|-----------|-----------|
| 9 | -0.018134 | 0.826611  | 2.351236  |
| 9 | 0.004522  | -1.903060 | -2.257972 |
| 9 | -0.021928 | 0.837901  | -2.349511 |
| 8 | -0.033559 | 2.238509  | 0.007298  |
| 1 | -0.037615 | 2.586370  | -0.895746 |

py-14\_A\_o3lyp

|   |           |           |           |
|---|-----------|-----------|-----------|
| 6 | 0.000362  | -1.195491 | 1.121366  |
| 6 | -0.012936 | 0.191946  | 1.190601  |
| 6 | -0.020792 | 0.910400  | -0.010599 |
| 6 | -0.014591 | 0.169340  | -1.196983 |
| 6 | -0.001220 | -1.214430 | -1.128755 |
| 7 | 0.006061  | -1.879041 | 0.000846  |
| 9 | 0.007943  | -1.890812 | 2.256215  |
| 9 | -0.018213 | 0.835269  | 2.357279  |
| 9 | 0.004678  | -1.919318 | -2.258237 |
| 9 | -0.021931 | 0.836837  | -2.365686 |
| 8 | -0.033662 | 2.249850  | 0.015919  |
| 1 | -0.037616 | 2.587148  | -0.886896 |

py-14\_A\_pbe0

|   |           |           |           |
|---|-----------|-----------|-----------|
| 6 | 0.000326  | -1.192094 | 1.117765  |
| 6 | -0.012923 | 0.190239  | 1.187111  |
| 6 | -0.020742 | 0.905301  | -0.008686 |
| 6 | -0.014579 | 0.168637  | -1.190790 |
| 6 | -0.001261 | -1.209934 | -1.125485 |
| 7 | 0.006007  | -1.873411 | 0.000415  |
| 9 | 0.007831  | -1.879818 | 2.248140  |
| 9 | -0.018163 | 0.829388  | 2.348546  |
| 9 | 0.004554  | -1.905854 | -2.251251 |
| 9 | -0.021927 | 0.837646  | -2.350656 |
| 8 | -0.033554 | 2.238324  | 0.011878  |
| 1 | -0.037486 | 2.573274  | -0.891917 |

py-14\_A\_pbe

|   |           |           |           |
|---|-----------|-----------|-----------|
| 6 | 0.000426  | -1.201615 | 1.127832  |
| 6 | -0.012928 | 0.191782  | 1.198773  |
| 6 | -0.020818 | 0.913413  | -0.007036 |
| 6 | -0.014601 | 0.170221  | -1.198879 |
| 6 | -0.001182 | -1.218861 | -1.134703 |
| 7 | 0.006150  | -1.888252 | 0.000776  |
| 9 | 0.008069  | -1.902503 | 2.273735  |
| 9 | -0.018265 | 0.842118  | 2.374277  |
| 9 | 0.004743  | -1.927545 | -2.276391 |
| 9 | -0.022104 | 0.854282  | -2.372750 |
| 8 | -0.033774 | 2.261383  | 0.014748  |
| 1 | -0.037631 | 2.587274  | -0.905313 |

py-14\_A\_rtpss

|   |           |           |           |
|---|-----------|-----------|-----------|
| 6 | 0.000392  | -1.198383 | 1.124233  |
| 6 | -0.012924 | 0.191101  | 1.196078  |
| 6 | -0.020801 | 0.911685  | -0.005792 |
| 6 | -0.014593 | 0.169839  | -1.194107 |
| 6 | -0.001213 | -1.215435 | -1.131803 |
| 7 | 0.006191  | -1.892492 | 0.000468  |
| 9 | 0.008026  | -1.898281 | 2.270228  |
| 9 | -0.018239 | 0.839351  | 2.374119  |
| 9 | 0.004696  | -1.922474 | -2.273779 |
| 9 | -0.022125 | 0.856835  | -2.367716 |
| 8 | -0.033773 | 2.261228  | 0.013157  |
| 1 | -0.037553 | 2.578724  | -0.910018 |

py-14\_A\_tpssh

|   |           |           |           |
|---|-----------|-----------|-----------|
| 6 | 0.000364  | -1.195689 | 1.121841  |
| 6 | -0.012923 | 0.190661  | 1.192078  |
| 6 | -0.020773 | 0.908654  | -0.007627 |
| 6 | -0.014581 | 0.168654  | -1.193223 |
| 6 | -0.001228 | -1.213653 | -1.129424 |
| 7 | 0.006104  | -1.883436 | 0.000618  |
| 9 | 0.007959  | -1.892063 | 2.260903  |
| 9 | -0.018209 | 0.835422  | 2.363738  |
| 9 | 0.004662  | -1.918115 | -2.263881 |
| 9 | -0.022035 | 0.848006  | -2.361876 |
| 8 | -0.033686 | 2.252078  | 0.011897  |
| 1 | -0.037568 | 2.581179  | -0.899975 |

py-14\_A\_wb97xd

|   |           |           |           |
|---|-----------|-----------|-----------|
| 6 | 0.000329  | -1.192209 | 1.117975  |
| 6 | -0.012924 | 0.190226  | 1.185229  |
| 6 | -0.020742 | 0.905495  | -0.010347 |
| 6 | -0.014572 | 0.167649  | -1.191657 |
| 6 | -0.001253 | -1.211236 | -1.125252 |
| 7 | 0.006025  | -1.875386 | 0.000809  |
| 9 | 0.007840  | -1.880047 | 2.249042  |
| 9 | -0.018171 | 0.829756  | 2.348064  |
| 9 | 0.004573  | -1.908134 | -2.251222 |
| 9 | -0.021877 | 0.832828  | -2.355279 |
| 8 | -0.033565 | 2.239249  | 0.013129  |
| 1 | -0.037578 | 2.583507  | -0.885420 |

py-14\_A\_x3lyp

|   |           |           |          |
|---|-----------|-----------|----------|
| 6 | 0.000360  | -1.195365 | 1.120997 |
| 6 | -0.012913 | 0.189397  | 1.188319 |

|   |           |           |           |
|---|-----------|-----------|-----------|
| 6 | -0.020755 | 0.906651  | -0.009713 |
| 6 | -0.014564 | 0.166881  | -1.193149 |
| 6 | -0.001223 | -1.214097 | -1.127859 |
| 7 | 0.006057  | -1.878534 | 0.001022  |
| 9 | 0.007910  | -1.887158 | 2.259204  |
| 9 | -0.018192 | 0.833106  | 2.357262  |
| 9 | 0.004634  | -1.915005 | -2.261006 |
| 9 | -0.021944 | 0.838545  | -2.362143 |
| 8 | -0.033634 | 2.246714  | 0.012593  |
| 1 | -0.037651 | 2.590563  | -0.890459 |

py-15\_A\_b31yp

|   |           |           |           |
|---|-----------|-----------|-----------|
| 6 | -0.002516 | -1.214035 | 1.100148  |
| 6 | -0.003441 | 0.171008  | 1.166950  |
| 6 | -0.003828 | 0.889496  | -0.020252 |
| 6 | -0.003269 | 0.183618  | -1.207489 |
| 6 | -0.002342 | -1.214988 | -1.180221 |
| 7 | -0.001989 | -1.877482 | -0.032378 |
| 9 | -0.002124 | -1.928888 | 2.229033  |
| 9 | -0.003950 | 0.803818  | 2.351453  |
| 9 | -0.003609 | 0.831768  | -2.383361 |
| 1 | -0.001186 | -2.841318 | -2.118740 |
| 1 | -0.004547 | 1.971474  | -0.016100 |
| 8 | -0.001797 | -1.899367 | -2.337420 |

py-15\_A\_b3p86

|   |           |           |           |
|---|-----------|-----------|-----------|
| 6 | -0.002514 | -1.213174 | 1.096170  |
| 6 | -0.003439 | 0.169383  | 1.164565  |
| 6 | -0.003825 | 0.885328  | -0.020734 |
| 6 | -0.003268 | 0.182856  | -1.206809 |
| 6 | -0.002342 | -1.213142 | -1.178806 |
| 7 | -0.001989 | -1.873918 | -0.034259 |
| 9 | -0.002127 | -1.925078 | 2.218044  |
| 9 | -0.003947 | 0.797579  | 2.342514  |
| 9 | -0.003607 | 0.827230  | -2.375615 |
| 1 | -0.001193 | -2.834654 | -2.106802 |
| 1 | -0.004546 | 1.967916  | -0.016300 |
| 8 | -0.001801 | -1.895221 | -2.330347 |

py-15\_A\_b3pw91

|   |           |           |           |
|---|-----------|-----------|-----------|
| 6 | -0.002514 | -1.213817 | 1.097339  |
| 6 | -0.003440 | 0.170157  | 1.166106  |
| 6 | -0.003826 | 0.886414  | -0.020579 |
| 6 | -0.003268 | 0.183642  | -1.208064 |
| 6 | -0.002341 | -1.213875 | -1.179971 |
| 7 | -0.001989 | -1.874629 | -0.034174 |
| 9 | -0.002126 | -1.927873 | 2.219859  |

|   |           |           |           |
|---|-----------|-----------|-----------|
| 9 | -0.003949 | 0.800085  | 2.344951  |
| 9 | -0.003609 | 0.830089  | -2.377595 |
| 1 | -0.001191 | -2.836955 | -2.107904 |
| 1 | -0.004547 | 1.969656  | -0.016135 |
| 8 | -0.001799 | -1.897790 | -2.332211 |

py-15\_A\_blyp

|   |           |           |           |
|---|-----------|-----------|-----------|
| 6 | -0.002511 | -1.219898 | 1.109738  |
| 6 | -0.003445 | 0.176888  | 1.177071  |
| 6 | -0.003836 | 0.901929  | -0.018636 |
| 6 | -0.003272 | 0.189545  | -1.215013 |
| 6 | -0.002336 | -1.220582 | -1.189930 |
| 7 | -0.001979 | -1.890442 | -0.031251 |
| 9 | -0.002115 | -1.947146 | 2.254673  |
| 9 | -0.003965 | 0.820680  | 2.377073  |
| 9 | -0.003620 | 0.850002  | -2.405993 |
| 1 | -0.001172 | -2.863235 | -2.130560 |
| 1 | -0.004561 | 1.990380  | -0.014553 |
| 8 | -0.001786 | -1.913016 | -2.360997 |

py-15\_A\_bp86

|   |           |           |           |
|---|-----------|-----------|-----------|
| 6 | -0.002510 | -1.220112 | 1.106099  |
| 6 | -0.003444 | 0.175355  | 1.175421  |
| 6 | -0.003834 | 0.898566  | -0.019198 |
| 6 | -0.003272 | 0.189598  | -1.215619 |
| 6 | -0.002337 | -1.218778 | -1.189528 |
| 7 | -0.001980 | -1.888091 | -0.033928 |
| 9 | -0.002117 | -1.944137 | 2.242939  |
| 9 | -0.003960 | 0.813532  | 2.368441  |
| 9 | -0.003618 | 0.845357  | -2.398966 |
| 1 | -0.001178 | -2.856763 | -2.115104 |
| 1 | -0.004560 | 1.989515  | -0.014456 |
| 8 | -0.001790 | -1.908936 | -2.354481 |

py-15\_A\_bpw91

py-15\_A\_camb3lyp

|   |           |           |           |
|---|-----------|-----------|-----------|
| 6 | -0.002515 | -1.210696 | 1.095300  |
| 6 | -0.003438 | 0.167985  | 1.161468  |
| 6 | -0.003824 | 0.884160  | -0.020874 |
| 6 | -0.003267 | 0.180644  | -1.202353 |
| 6 | -0.002343 | -1.212437 | -1.174849 |
| 7 | -0.001991 | -1.872018 | -0.032904 |
| 9 | -0.002131 | -1.919664 | 2.219636  |
| 9 | -0.003945 | 0.795169  | 2.341844  |
| 9 | -0.003604 | 0.822257  | -2.374467 |

|   |           |           |           |
|---|-----------|-----------|-----------|
| 1 | -0.001193 | -2.834128 | -2.116300 |
| 1 | -0.004544 | 1.966013  | -0.016824 |
| 8 | -0.001803 | -1.892180 | -2.328055 |

py-15\_A\_mn15

|   |           |           |           |
|---|-----------|-----------|-----------|
| 6 | -0.002515 | -1.212505 | 1.100345  |
| 6 | -0.003440 | 0.170780  | 1.167192  |
| 6 | -0.003826 | 0.886605  | -0.020048 |
| 6 | -0.003268 | 0.183412  | -1.206956 |
| 6 | -0.002342 | -1.213450 | -1.178129 |
| 7 | -0.001989 | -1.874081 | -0.032498 |
| 9 | -0.002133 | -1.916597 | 2.224062  |
| 9 | -0.003945 | 0.793580  | 2.345526  |
| 9 | -0.003603 | 0.821075  | -2.376753 |
| 1 | -0.001189 | -2.838861 | -2.123347 |
| 1 | -0.004546 | 1.968941  | -0.016064 |
| 8 | -0.001802 | -1.893794 | -2.331709 |

py-15\_A\_o3lyp

|   |           |           |           |
|---|-----------|-----------|-----------|
| 6 | -0.002514 | -1.215448 | 1.099609  |
| 6 | -0.003442 | 0.172238  | 1.169413  |
| 6 | -0.003828 | 0.888803  | -0.020315 |
| 6 | -0.003269 | 0.185214  | -1.210897 |
| 6 | -0.002340 | -1.216034 | -1.182365 |
| 7 | -0.001987 | -1.877192 | -0.033896 |
| 9 | -0.002121 | -1.934198 | 2.223009  |
| 9 | -0.003953 | 0.805947  | 2.349116  |
| 9 | -0.003613 | 0.836028  | -2.381042 |
| 1 | -0.001190 | -2.839675 | -2.108176 |
| 1 | -0.004548 | 1.972023  | -0.016085 |
| 8 | -0.001795 | -1.902602 | -2.336751 |

py-15\_A\_pbe0

|   |           |           |           |
|---|-----------|-----------|-----------|
| 6 | -0.002514 | -1.213109 | 1.095316  |
| 6 | -0.003439 | 0.168999  | 1.164241  |
| 6 | -0.003825 | 0.884545  | -0.020980 |
| 6 | -0.003268 | 0.182601  | -1.206891 |
| 6 | -0.002342 | -1.213011 | -1.178030 |
| 7 | -0.001990 | -1.873568 | -0.034589 |
| 9 | -0.002128 | -1.923576 | 2.214747  |
| 9 | -0.003945 | 0.795152  | 2.340298  |
| 9 | -0.003606 | 0.824644  | -2.373898 |
| 1 | -0.001195 | -2.831618 | -2.104018 |
| 1 | -0.004545 | 1.967882  | -0.016473 |
| 8 | -0.001802 | -1.893836 | -2.328100 |



|             |           |           |           |
|-------------|-----------|-----------|-----------|
| py-15_A_pbe |           |           |           |
| 6           | -0.002511 | -1.219409 | 1.104462  |
| 6           | -0.003443 | 0.174636  | 1.173987  |
| 6           | -0.003833 | 0.896546  | -0.019437 |
| 6           | -0.003271 | 0.188635  | -1.214573 |
| 6           | -0.002338 | -1.218339 | -1.188224 |
| 7           | -0.001981 | -1.886181 | -0.034097 |
| 9           | -0.002118 | -1.941628 | 2.240039  |
| 9           | -0.003958 | 0.810902  | 2.365314  |
| 9           | -0.003616 | 0.842189  | -2.396367 |
| 1           | -0.001180 | -2.853104 | -2.112899 |
| 1           | -0.004558 | 1.987152  | -0.014833 |
| 8           | -0.001792 | -1.906295 | -2.351751 |

|               |           |           |           |
|---------------|-----------|-----------|-----------|
| py-15_A_rtpss |           |           |           |
| 6             | -0.002513 | -1.216829 | 1.100761  |
| 6             | -0.003442 | 0.172924  | 1.169782  |
| 6             | -0.003834 | 0.898087  | -0.019741 |
| 6             | -0.003270 | 0.187026  | -1.210843 |
| 6             | -0.002340 | -1.215414 | -1.185266 |
| 7             | -0.001978 | -1.890484 | -0.034732 |
| 9             | -0.002120 | -1.937890 | 2.236660  |
| 9             | -0.003955 | 0.806936  | 2.364022  |
| 9             | -0.003614 | 0.839181  | -2.395419 |
| 1             | -0.001183 | -2.849412 | -2.108329 |
| 1             | -0.004557 | 1.984473  | -0.015135 |
| 8             | -0.001794 | -1.903493 | -2.350138 |

|               |           |           |           |
|---------------|-----------|-----------|-----------|
| py-15_A_tpssh |           |           |           |
| 6             | -0.002514 | -1.214689 | 1.099389  |
| 6             | -0.003441 | 0.171644  | 1.167847  |
| 6             | -0.003830 | 0.892394  | -0.020107 |
| 6             | -0.003269 | 0.185240  | -1.209113 |
| 6             | -0.002341 | -1.214263 | -1.182388 |
| 7             | -0.001984 | -1.881622 | -0.034057 |
| 9             | -0.002123 | -1.933128 | 2.227956  |
| 9             | -0.003952 | 0.804305  | 2.354361  |
| 9             | -0.003612 | 0.835259  | -2.386142 |
| 1             | -0.001187 | -2.843522 | -2.109966 |
| 1             | -0.004550 | 1.975163  | -0.015639 |
| 8             | -0.001796 | -1.901677 | -2.340520 |

|                |           |           |           |
|----------------|-----------|-----------|-----------|
| py-15_A_wb97xd |           |           |           |
| 6              | -0.002515 | -1.212413 | 1.096602  |
| 6              | -0.003439 | 0.169137  | 1.163846  |
| 6              | -0.003825 | 0.885493  | -0.020985 |
| 6              | -0.003268 | 0.182121  | -1.205409 |

|   |           |           |           |
|---|-----------|-----------|-----------|
| 6 | -0.002342 | -1.213542 | -1.176791 |
| 7 | -0.001989 | -1.875085 | -0.033499 |
| 9 | -0.002128 | -1.923496 | 2.216681  |
| 9 | -0.003947 | 0.797323  | 2.340774  |
| 9 | -0.003606 | 0.824607  | -2.374096 |
| 1 | -0.001194 | -2.832425 | -2.111102 |
| 1 | -0.004546 | 1.967894  | -0.016614 |
| 8 | -0.001801 | -1.894508 | -2.327786 |

py-15\_A\_x3lyp

|   |           |           |           |
|---|-----------|-----------|-----------|
| 6 | -0.002515 | -1.213439 | 1.099796  |
| 6 | -0.003440 | 0.170950  | 1.166731  |
| 6 | -0.003828 | 0.889059  | -0.020179 |
| 6 | -0.003268 | 0.183131  | -1.206841 |
| 6 | -0.002341 | -1.215132 | -1.179296 |
| 7 | -0.001988 | -1.876895 | -0.031999 |
| 9 | -0.002127 | -1.927244 | 2.227902  |
| 9 | -0.003951 | 0.802711  | 2.350426  |
| 9 | -0.003609 | 0.830189  | -2.381954 |
| 1 | -0.001188 | -2.840856 | -2.120471 |
| 1 | -0.004548 | 1.971246  | -0.016308 |
| 8 | -0.001798 | -1.898615 | -2.336185 |

## C Computed IR and Raman Spectra of monomers

py-01\_A\_b3lyp

| NM# | Symm | Wavenumber | Force Const | IR Intens | Raman Activ |
|-----|------|------------|-------------|-----------|-------------|
| 1   | A''  | 121.1486   | 0.1571      | 0.0095    | 0.0031      |
| 2   | A'   | 155.2360   | 0.1423      | 0.7224    | 0.2124      |
| 3   | A'   | 205.9105   | 0.2096      | 1.2733    | 0.4193      |
| 4   | A''  | 275.2808   | 0.1927      | 4.7534    | 0.8068      |
| 5   | A'   | 279.8887   | 0.6705      | 3.6680    | 0.4590      |
| 6   | A'   | 304.1893   | 0.0693      | 247.0842  | 2.6784      |
| 7   | A''  | 312.1516   | 0.5373      | 0.2449    | 0.2142      |
| 8   | A'   | 341.7527   | 0.8863      | 10.8012   | 0.6900      |
| 9   | A'   | 349.6120   | 0.8659      | 13.3973   | 0.2714      |
| 10  | A''  | 409.3057   | 0.2133      | 2.2807    | 1.8928      |
| 11  | A''  | 463.8763   | 1.7095      | 0.3018    | 4.4188      |
| 12  | A''  | 468.6353   | 0.2258      | 3.0396    | 1.1515      |
| 13  | A'   | 485.6509   | 1.6575      | 2.4597    | 6.7591      |
| 14  | A'   | 610.0419   | 2.1482      | 5.4495    | 20.5494     |
| 15  | A'   | 641.5894   | 2.7634      | 6.6897    | 0.5312      |
| 16  | A''  | 673.2523   | 3.2385      | 0.0002    | 0.0036      |
| 17  | A'   | 696.2458   | 4.2833      | 3.1958    | 12.9488     |
| 18  | A''  | 718.6331   | 1.9866      | 0.4396    | 0.1445      |
| 19  | A'   | 729.0306   | 3.7063      | 6.3473    | 0.9167      |
| 20  | A''  | 910.8158   | 2.0816      | 132.6775  | 0.0106      |
| 21  | A'   | 1116.0109  | 6.7575      | 208.4489  | 0.2468      |
| 22  | A''  | 1124.2619  | 3.2926      | 74.1090   | 0.5424      |
| 23  | A''  | 1182.4631  | 2.1859      | 60.8039   | 0.6953      |
| 24  | A'   | 1281.3574  | 8.9366      | 51.5451   | 6.8237      |
| 25  | A''  | 1374.1834  | 8.8427      | 18.5998   | 14.4976     |
| 26  | A'   | 1431.7483  | 14.4633     | 32.4286   | 5.2358      |
| 27  | A''  | 1504.6276  | 15.7129     | 616.0222  | 3.4541      |
| 28  | A'   | 1551.8845  | 8.1319      | 93.4046   | 0.6159      |
| 29  | A'   | 1637.3949  | 2.3591      | 9.6409    | 1.0300      |
| 30  | A''  | 1645.7640  | 15.2573     | 7.4103    | 0.6915      |
| 31  | A'   | 1681.8658  | 7.8911      | 385.5952  | 22.6396     |
| 32  | A'   | 3605.9928  | 8.0087      | 101.3733  | 139.1222    |
| 33  | A''  | 3722.4729  | 9.0191      | 69.6063   | 36.3667     |

py-01\_A\_b3p86

| NM# | Symm | Wavenumber | Force Const | IR Intens | Raman Activ |
|-----|------|------------|-------------|-----------|-------------|
| 1   | A''  | 121.4599   | 0.1579      | 0.0093    | 0.0025      |
| 2   | A'   | 155.7929   | 0.1448      | 0.6142    | 0.2163      |
| 3   | A'   | 207.8240   | 0.2080      | 1.7732    | 0.4184      |
| 4   | A''  | 268.7647   | 0.1786      | 4.7283    | 0.8028      |
| 5   | A'   | 277.3286   | 0.6479      | 3.9160    | 0.4228      |

|    |     |           |         |          |          |
|----|-----|-----------|---------|----------|----------|
| 6  | A'  | 298.4697  | 0.0662  | 250.7054 | 2.6848   |
| 7  | A'' | 312.4535  | 0.5543  | 0.2204   | 0.1993   |
| 8  | A'  | 344.1652  | 0.9311  | 8.0332   | 0.6404   |
| 9  | A'  | 351.9124  | 0.9353  | 10.3165  | 0.2812   |
| 10 | A'' | 411.2850  | 0.1995  | 2.4911   | 1.8383   |
| 11 | A'' | 464.0786  | 1.7994  | 0.2166   | 4.4016   |
| 12 | A'' | 470.6430  | 0.2418  | 2.8523   | 1.0522   |
| 13 | A'  | 484.1555  | 1.6528  | 2.4265   | 6.4232   |
| 14 | A'  | 613.5067  | 2.1882  | 4.7962   | 19.6868  |
| 15 | A'  | 642.6813  | 2.7419  | 6.2723   | 0.4818   |
| 16 | A'' | 673.9396  | 3.2400  | 0.0008   | 0.0024   |
| 17 | A'  | 700.6421  | 4.3321  | 2.3164   | 13.3685  |
| 18 | A'' | 721.9370  | 1.9698  | 0.2980   | 0.1643   |
| 19 | A'  | 723.3743  | 3.6572  | 6.3975   | 0.9131   |
| 20 | A'' | 921.6553  | 1.9876  | 118.2858 | 0.0045   |
| 21 | A'  | 1129.0946 | 6.8810  | 202.9800 | 0.2164   |
| 22 | A'' | 1138.4543 | 2.6194  | 91.1772  | 0.2388   |
| 23 | A'' | 1195.4515 | 2.7705  | 39.1735  | 0.9550   |
| 24 | A'  | 1298.2151 | 8.7239  | 53.9320  | 6.4712   |
| 25 | A'' | 1405.8512 | 10.1083 | 19.8792  | 14.0818  |
| 26 | A'  | 1452.0882 | 14.8772 | 32.8393  | 5.1045   |
| 27 | A'' | 1527.8465 | 16.3708 | 639.2009 | 3.4273   |
| 28 | A'  | 1571.1960 | 5.9075  | 75.9793  | 0.3805   |
| 29 | A'  | 1638.1385 | 2.3901  | 47.6697  | 1.7277   |
| 30 | A'' | 1669.4777 | 16.3374 | 8.4809   | 0.6355   |
| 31 | A'  | 1701.6005 | 12.1372 | 369.4589 | 20.7681  |
| 32 | A'  | 3624.8754 | 8.0944  | 104.7465 | 136.3516 |
| 33 | A'' | 3744.7601 | 9.1273  | 73.2643  | 35.2028  |

py-01\_A\_b3pw91

| NM# | Symm | Wavenumber | Force Const | IR Intens | Raman Activ |
|-----|------|------------|-------------|-----------|-------------|
| 1   | A''  | 120.8821   | 0.1564      | 0.0095    | 0.0027      |
| 2   | A'   | 155.0818   | 0.1401      | 0.7048    | 0.2131      |
| 3   | A'   | 208.4518   | 0.2157      | 1.4989    | 0.4177      |
| 4   | A''  | 270.8829   | 0.1822      | 4.7299    | 0.8014      |
| 5   | A'   | 278.3074   | 0.6873      | 2.9667    | 0.3849      |
| 6   | A'   | 302.9842   | 0.0682      | 250.4260  | 2.6557      |
| 7   | A''  | 312.8090   | 0.5565      | 0.2313    | 0.2007      |
| 8   | A'   | 344.2816   | 0.9216      | 8.9068    | 0.6506      |
| 9   | A'   | 351.7402   | 0.9017      | 11.9876   | 0.2862      |
| 10  | A''  | 410.4500   | 0.1895      | 2.7516    | 1.7989      |
| 11  | A''  | 463.0925   | 1.7957      | 0.2205    | 4.4146      |
| 12  | A''  | 469.2963   | 0.2518      | 2.7979    | 1.1126      |
| 13  | A'   | 482.9860   | 1.6384      | 2.5149    | 6.4794      |
| 14  | A'   | 611.7028   | 2.1715      | 4.9526    | 19.8427     |
| 15  | A'   | 642.6348   | 2.7412      | 6.4300    | 0.4955      |
| 16  | A''  | 675.0586   | 3.2513      | 0.0009    | 0.0026      |

|    |     |           |         |          |          |
|----|-----|-----------|---------|----------|----------|
| 17 | A'  | 698.6725  | 4.3101  | 2.4919   | 13.2953  |
| 18 | A'' | 721.6131  | 1.9805  | 0.3077   | 0.1619   |
| 19 | A'  | 725.4078  | 3.6731  | 6.1539   | 0.8736   |
| 20 | A'' | 919.5529  | 2.0135  | 121.5420 | 0.0052   |
| 21 | A'  | 1125.1047 | 6.8473  | 203.6958 | 0.2175   |
| 22 | A'' | 1135.2316 | 2.7577  | 86.7287  | 0.3042   |
| 23 | A'' | 1192.2621 | 2.5807  | 43.6996  | 0.9160   |
| 24 | A'  | 1293.4847 | 8.7725  | 53.2335  | 6.4115   |
| 25 | A'' | 1400.5165 | 9.8766  | 17.8134  | 14.3565  |
| 26 | A'  | 1447.1749 | 14.7899 | 31.6520  | 5.2263   |
| 27 | A'' | 1522.5597 | 16.1890 | 636.7020 | 3.3502   |
| 28 | A'  | 1566.6539 | 6.5334  | 82.6004  | 0.4573   |
| 29 | A'  | 1638.1981 | 2.3325  | 36.5751  | 1.5684   |
| 30 | A'' | 1664.9005 | 16.1916 | 8.8062   | 0.6197   |
| 31 | A'  | 1696.9928 | 11.2077 | 370.2649 | 21.2593  |
| 32 | A'  | 3623.5567 | 8.0888  | 101.8533 | 136.8991 |
| 33 | A'' | 3742.7775 | 9.1166  | 71.0024  | 35.4971  |

-----

py-01\_A\_blyp

| NM# | Symm | Wavenumber | Force Const | IR Intens | Raman Activ |
|-----|------|------------|-------------|-----------|-------------|
| 1   | A''  | 113.8493   | 0.1390      | 0.0106    | 0.0044      |
| 2   | A'   | 148.1183   | 0.1225      | 1.1976    | 0.2081      |
| 3   | A'   | 196.3512   | 0.2110      | 0.6111    | 0.4795      |
| 4   | A''  | 267.1616   | 0.1819      | 4.5236    | 0.8905      |
| 5   | A'   | 270.0221   | 0.7374      | 1.2536    | 0.3760      |
| 6   | A''  | 300.1563   | 0.4862      | 0.4371    | 0.2553      |
| 7   | A'   | 321.6877   | 0.2128      | 48.3528   | 0.8566      |
| 8   | A'   | 330.8643   | 0.4783      | 26.3950   | 1.0360      |
| 9   | A'   | 343.0208   | 0.1295      | 190.7277  | 1.3547      |
| 10  | A''  | 392.0903   | 0.2177      | 2.1200    | 1.9138      |
| 11  | A''  | 445.2673   | 1.6537      | 0.2657    | 5.0106      |
| 12  | A''  | 452.6159   | 0.1957      | 3.6154    | 1.0722      |
| 13  | A'   | 465.5840   | 1.4975      | 3.7726    | 8.7878      |
| 14  | A'   | 582.2795   | 1.9027      | 7.8582    | 22.7360     |
| 15  | A'   | 607.1573   | 2.4946      | 6.7558    | 0.4522      |
| 16  | A''  | 633.7474   | 2.8658      | 0.0000    | 0.0074      |
| 17  | A'   | 661.7353   | 3.8605      | 3.9923    | 13.4565     |
| 18  | A'   | 685.6366   | 3.2316      | 3.7285    | 1.0104      |
| 19  | A''  | 689.4988   | 1.8914      | 0.8253    | 0.1875      |
| 20  | A''  | 864.8157   | 2.0763      | 153.0023  | 0.0154      |
| 21  | A''  | 1060.1933  | 4.7432      | 46.6248   | 1.3419      |
| 22  | A'   | 1062.4082  | 6.2688      | 202.7762  | 0.4105      |
| 23  | A''  | 1132.9029  | 1.5590      | 92.9350   | 0.8807      |
| 24  | A'   | 1208.4934  | 8.2228      | 48.0728   | 7.5315      |
| 25  | A''  | 1342.6896  | 8.1067      | 54.9006   | 11.0970     |
| 26  | A'   | 1348.5824  | 12.8178     | 27.0635   | 5.3896      |
| 27  | A''  | 1424.1929  | 14.1568     | 534.7412  | 5.0734      |

|    |     |           |         |          |          |
|----|-----|-----------|---------|----------|----------|
| 28 | A'  | 1481.8248 | 9.5418  | 70.7441  | 0.3772   |
| 29 | A'' | 1560.8425 | 13.0189 | 4.3882   | 0.6071   |
| 30 | A'  | 1580.6083 | 3.0927  | 25.4650  | 2.5694   |
| 31 | A'  | 1615.5445 | 3.3999  | 321.1307 | 16.2606  |
| 32 | A'  | 3500.9610 | 7.5475  | 83.8968  | 156.0271 |
| 33 | A'' | 3612.1086 | 8.4859  | 57.9286  | 40.2332  |

py-01\_A\_bp86

| NM# | Symm | Wavenumber | Force Const | IR Intens | Raman Activ |
|-----|------|------------|-------------|-----------|-------------|
| 1   | A''  | 113.8310   | 0.1388      | 0.0117    | 0.0036      |
| 2   | A'   | 148.8628   | 0.1191      | 1.3087    | 0.2059      |
| 3   | A'   | 197.3872   | 0.2155      | 0.7325    | 0.4695      |
| 4   | A''  | 260.7395   | 0.1668      | 4.5297    | 0.8690      |
| 5   | A'   | 267.6872   | 0.7297      | 1.2676    | 0.3229      |
| 6   | A''  | 300.5287   | 0.5022      | 0.3957    | 0.2263      |
| 7   | A'   | 324.3224   | 0.3270      | 22.2917   | 0.6242      |
| 8   | A'   | 334.6737   | 0.6874      | 10.2390   | 0.7269      |
| 9   | A'   | 354.9390   | 0.1110      | 235.0024  | 1.7099      |
| 10  | A''  | 392.0124   | 0.1914      | 2.7682    | 1.8380      |
| 11  | A''  | 445.6644   | 1.5766      | 0.2894    | 4.7915      |
| 12  | A''  | 451.4550   | 0.2177      | 3.5137    | 1.2409      |
| 13  | A'   | 465.5067   | 1.4673      | 4.3700    | 8.1859      |
| 14  | A'   | 587.8695   | 1.9451      | 7.2878    | 21.9933     |
| 15  | A'   | 606.4075   | 2.4957      | 5.7965    | 0.3602      |
| 16  | A''  | 631.8399   | 2.8430      | 0.0007    | 0.0043      |
| 17  | A'   | 667.4816   | 3.8994      | 2.9791    | 13.4479     |
| 18  | A'   | 674.8646   | 3.1642      | 3.9582    | 1.4977      |
| 19  | A''  | 692.6165   | 1.8834      | 0.5232    | 0.2142      |
| 20  | A''  | 878.6745   | 1.9900      | 136.6000  | 0.0043      |
| 21  | A'   | 1077.0428  | 6.4153      | 196.3953  | 0.3385      |
| 22  | A''  | 1081.9448  | 3.7083      | 59.1857   | 0.8709      |
| 23  | A''  | 1143.1959  | 1.7630      | 70.7176   | 1.2896      |
| 24  | A'   | 1228.6860  | 8.0353      | 50.1267   | 7.1722      |
| 25  | A'   | 1374.0484  | 13.3631     | 29.4450   | 5.3147      |
| 26  | A''  | 1375.1460  | 9.3319      | 64.4144   | 10.4384     |
| 27  | A''  | 1448.6269  | 14.8421     | 558.1221  | 5.1857      |
| 28  | A'   | 1505.0005  | 7.5987      | 62.4708   | 0.4646      |
| 29  | A'   | 1580.1884  | 2.1790      | 8.1628    | 0.9989      |
| 30  | A''  | 1585.3726  | 14.1256     | 4.7406    | 0.5435      |
| 31  | A'   | 1629.6020  | 7.5697      | 345.1951  | 16.4105     |
| 32  | A'   | 3508.1054  | 7.5803      | 82.2580   | 155.6779    |
| 33  | A''  | 3622.3962  | 8.5321      | 59.6587   | 39.6527     |

py-01\_A\_bpw91

| NM# | Symm | Wavenumber | Force Const | IR Intens | Raman Activ |
|-----|------|------------|-------------|-----------|-------------|
|-----|------|------------|-------------|-----------|-------------|

|    |     |           |         |          |          |
|----|-----|-----------|---------|----------|----------|
| 1  | A'' | 113.6655  | 0.1385  | 0.0112   | 0.0036   |
| 2  | A'  | 148.5303  | 0.1191  | 1.2747   | 0.2073   |
| 3  | A'  | 198.9849  | 0.2190  | 0.7269   | 0.4664   |
| 4  | A'' | 263.7737  | 0.1718  | 4.5411   | 0.8655   |
| 5  | A'  | 269.6103  | 0.7392  | 1.2365   | 0.3205   |
| 6  | A'' | 302.2521  | 0.5090  | 0.4085   | 0.2303   |
| 7  | A'  | 325.4438  | 0.2588  | 36.1569  | 0.7166   |
| 8  | A'  | 335.5837  | 0.5889  | 17.0231  | 0.8415   |
| 9  | A'  | 350.7153  | 0.1205  | 213.9889 | 1.5119   |
| 10 | A'' | 394.2078  | 0.1879  | 2.8227   | 1.8126   |
| 11 | A'' | 446.5543  | 1.6495  | 0.2441   | 4.8176   |
| 12 | A'' | 453.5589  | 0.2236  | 3.3750   | 1.1410   |
| 13 | A'  | 466.1146  | 1.4815  | 4.0759   | 8.0819   |
| 14 | A'  | 589.0955  | 1.9670  | 7.1522   | 21.6562  |
| 15 | A'  | 609.8299  | 2.5125  | 6.0704   | 0.3735   |
| 16 | A'' | 637.3117  | 2.8934  | 0.0008   | 0.0050   |
| 17 | A'  | 669.1310  | 3.9362  | 2.9931   | 13.8603  |
| 18 | A'  | 682.7295  | 3.2226  | 3.7950   | 1.0654   |
| 19 | A'' | 695.4531  | 1.9008  | 0.5466   | 0.2122   |
| 20 | A'' | 881.0650  | 2.0159  | 138.6780 | 0.0055   |
| 21 | A'  | 1079.5194 | 6.4638  | 198.2352 | 0.3204   |
| 22 | A'' | 1083.4936 | 3.8179  | 58.5873  | 0.8934   |
| 23 | A'' | 1146.0744 | 1.7448  | 72.5733  | 1.2383   |
| 24 | A'  | 1231.4924 | 8.1214  | 49.9708  | 6.9847   |
| 25 | A'  | 1378.0163 | 13.4389 | 28.1318  | 5.2531   |
| 26 | A'' | 1380.1213 | 9.3644  | 60.2615  | 10.5914  |
| 27 | A'' | 1452.4535 | 14.8753 | 560.3840 | 5.0686   |
| 28 | A'  | 1509.6001 | 7.8643  | 64.1069  | 0.4422   |
| 29 | A'  | 1587.9081 | 2.2279  | 5.7695   | 0.9700   |
| 30 | A'' | 1590.8645 | 14.2996 | 5.4228   | 0.5307   |
| 31 | A'  | 1635.0217 | 7.1309  | 346.6666 | 16.6146  |
| 32 | A'  | 3529.9566 | 7.6750  | 82.7426  | 151.8501 |
| 33 | A'' | 3644.5529 | 8.6373  | 59.3104  | 38.9004  |

py-01\_A\_camb3lyp

| NM# | Symm | Wavenumber | Force Const | IR Intens | Raman Activ |
|-----|------|------------|-------------|-----------|-------------|
| 1   | A''  | 124.8634   | 0.1667      | 0.0050    | 0.0033      |
| 2   | A'   | 152.9919   | 0.2044      | 14.4348   | 0.7470      |
| 3   | A'   | 199.5219   | 0.0341      | 132.2548  | 2.0908      |
| 4   | A'   | 218.1563   | 0.0983      | 113.4945  | 2.2504      |
| 5   | A''  | 274.0403   | 0.1909      | 4.8444    | 0.8410      |
| 6   | A'   | 281.3434   | 0.7953      | 2.5549    | 0.1702      |
| 7   | A''  | 314.9528   | 0.5538      | 0.1762    | 0.2110      |
| 8   | A'   | 347.0799   | 0.9509      | 1.9524    | 0.5463      |
| 9   | A'   | 353.7450   | 1.0832      | 4.1465    | 0.2666      |
| 10  | A''  | 420.2029   | 0.2468      | 1.0614    | 1.8414      |

|    |     |           |         |          |          |
|----|-----|-----------|---------|----------|----------|
| 11 | A'' | 469.9667  | 1.9435  | 0.1617   | 4.3461   |
| 12 | A'' | 481.6190  | 0.2158  | 1.8384   | 0.6990   |
| 13 | A'  | 490.5729  | 1.7347  | 1.3837   | 5.8724   |
| 14 | A'  | 619.8654  | 2.2817  | 3.6641   | 18.6360  |
| 15 | A'  | 659.8086  | 2.8698  | 6.9209   | 0.7151   |
| 16 | A'' | 694.0986  | 3.4474  | 0.0000   | 0.0023   |
| 17 | A'  | 708.9709  | 4.4264  | 2.0650   | 13.6725  |
| 18 | A'' | 726.8621  | 1.9380  | 0.3782   | 0.0950   |
| 19 | A'  | 755.2952  | 3.9901  | 8.3637   | 0.9700   |
| 20 | A'' | 925.7115  | 1.9582  | 113.4349 | 0.0198   |
| 21 | A'  | 1139.6865 | 6.9208  | 211.8543 | 0.2553   |
| 22 | A'' | 1142.7266 | 2.4529  | 107.3897 | 0.2500   |
| 23 | A'' | 1200.6268 | 3.3096  | 32.1055  | 0.4618   |
| 24 | A'  | 1312.3340 | 8.9541  | 51.8064  | 5.7553   |
| 25 | A'' | 1365.2462 | 8.8586  | 9.4957   | 19.1928  |
| 26 | A'  | 1466.5552 | 14.9972 | 31.6178  | 5.2165   |
| 27 | A'' | 1543.2750 | 16.6431 | 641.4301 | 3.2243   |
| 28 | A'  | 1580.4214 | 5.5298  | 91.7634  | 1.7095   |
| 29 | A'  | 1650.0578 | 2.4450  | 85.3009  | 3.0896   |
| 30 | A'' | 1690.7032 | 16.9024 | 12.8951  | 0.7001   |
| 31 | A'  | 1717.7375 | 14.3630 | 387.4468 | 26.4643  |
| 32 | A'  | 3636.5919 | 8.1435  | 124.2901 | 128.4402 |
| 33 | A'' | 3755.9665 | 9.1927  | 83.5050  | 32.8547  |

py-01\_A\_m062x

| NM# | Symm | Wavenumber | Force Const | IR Intens | Raman Activ |
|-----|------|------------|-------------|-----------|-------------|
| 1   | A''  | 125.8587   | 0.1695      | 0.0113    | 0.0020      |
| 2   | A'   | 159.7851   | 0.1392      | 1.0102    | 0.2174      |
| 3   | A'   | 210.3104   | 0.2245      | 1.2784    | 0.4074      |
| 4   | A''  | 271.6849   | 0.1878      | 4.6193    | 0.7697      |
| 5   | A'   | 279.3273   | 0.7230      | 2.2611    | 0.3311      |
| 6   | A''  | 314.5881   | 0.5549      | 0.1064    | 0.1891      |
| 7   | A'   | 315.4460   | 0.0770      | 249.8028  | 2.8348      |
| 8   | A'   | 348.1459   | 0.8268      | 17.9298   | 0.7163      |
| 9   | A'   | 357.0964   | 0.7751      | 22.3520   | 0.3856      |
| 10  | A''  | 409.1635   | 0.1587      | 4.2434    | 1.7324      |
| 11  | A''  | 466.1116   | 0.3054      | 2.9100    | 0.8925      |
| 12  | A''  | 468.9836   | 1.8540      | 0.0065    | 4.6709      |
| 13  | A'   | 488.5760   | 1.6332      | 2.7978    | 5.8239      |
| 14  | A'   | 620.7320   | 2.2136      | 4.4349    | 17.6341     |
| 15  | A'   | 649.2458   | 2.7946      | 5.3002    | 0.4497      |
| 16  | A''  | 684.6359   | 3.3447      | 0.0017    | 0.0020      |
| 17  | A'   | 712.7655   | 4.4504      | 2.5017    | 14.1106     |
| 18  | A''  | 726.4237   | 2.0130      | 0.1381    | 0.1142      |
| 19  | A'   | 734.2393   | 3.8229      | 8.7459    | 0.7991      |
| 20  | A''  | 940.2765   | 1.9431      | 104.0718  | 0.0032      |
| 21  | A'   | 1144.6360  | 6.8368      | 199.0185  | 0.2615      |



|    |     |           |         |          |          |
|----|-----|-----------|---------|----------|----------|
| 22 | A'' | 1156.5639 | 2.1133  | 103.9272 | 0.1074   |
| 23 | A'' | 1224.7471 | 4.3202  | 16.4147  | 0.4522   |
| 24 | A'  | 1329.7887 | 8.8045  | 47.8200  | 5.0287   |
| 25 | A'' | 1361.6972 | 8.7371  | 5.0127   | 18.5490  |
| 26 | A'  | 1485.2849 | 15.5035 | 33.6175  | 5.5863   |
| 27 | A'' | 1560.0485 | 17.2078 | 664.0677 | 2.5907   |
| 28 | A'  | 1586.2543 | 5.0926  | 93.1315  | 2.9121   |
| 29 | A'  | 1646.8747 | 2.5143  | 99.7049  | 5.1320   |
| 30 | A'' | 1701.5465 | 17.1990 | 8.8846   | 0.5295   |
| 31 | A'  | 1723.6744 | 15.2898 | 341.9702 | 26.0169  |
| 32 | A'  | 3625.4764 | 8.0989  | 119.8449 | 138.1796 |
| 33 | A'' | 3746.4365 | 9.1364  | 83.3974  | 35.5446  |

py-01\_A\_mn15

| NM# | Symm | Wavenumber | Force Const | IR Intens | Raman Activ |
|-----|------|------------|-------------|-----------|-------------|
| 1   | A'   | 54.3203    | 0.0027      | 192.1148  | 0.0016      |
| 2   | A''  | 123.2981   | 0.1620      | 0.0000    | 0.0020      |
| 3   | A'   | 164.7170   | 0.0479      | 38.2020   | 0.2665      |
| 4   | A'   | 210.0757   | 0.3798      | 8.2099    | 0.4183      |
| 5   | A''  | 265.8684   | 0.1809      | 4.8725    | 0.9200      |
| 6   | A'   | 272.4408   | 0.7562      | 1.8880    | 0.1520      |
| 7   | A''  | 308.9818   | 0.5305      | 0.1136    | 0.2697      |
| 8   | A'   | 344.5024   | 0.9345      | 1.8738    | 0.4719      |
| 9   | A'   | 350.9061   | 1.0745      | 3.7256    | 0.3076      |
| 10  | A''  | 419.4222   | 0.2658      | 0.0000    | 2.0067      |
| 11  | A''  | 458.2015   | 1.8497      | 0.0853    | 4.5576      |
| 12  | A'   | 476.3732   | 1.6369      | 1.3989    | 5.7202      |
| 13  | A''  | 482.5935   | 0.2028      | 0.0000    | 0.2467      |
| 14  | A'   | 614.0374   | 2.2985      | 2.4498    | 17.6734     |
| 15  | A'   | 655.7532   | 2.8960      | 6.1504    | 0.2066      |
| 16  | A''  | 681.0567   | 3.3158      | 0.0000    | 0.0011      |
| 17  | A'   | 701.7527   | 4.3161      | 0.7224    | 15.8282     |
| 18  | A''  | 715.2744   | 1.7934      | 0.3663    | 0.1124      |
| 19  | A'   | 743.4726   | 3.8901      | 9.1192    | 0.2321      |
| 20  | A''  | 921.7550   | 1.6633      | 86.1074   | 0.0066      |
| 21  | A''  | 1131.6088  | 1.9658      | 135.0934  | 0.0108      |
| 22  | A'   | 1138.9870  | 6.8118      | 209.0131  | 0.2211      |
| 23  | A''  | 1206.8120  | 5.7354      | 8.9053    | 0.6747      |
| 24  | A'   | 1315.4586  | 8.1165      | 52.4701   | 6.2258      |
| 25  | A''  | 1373.5503  | 10.4223     | 12.5718   | 17.1098     |
| 26  | A'   | 1476.8791  | 15.1759     | 38.5378   | 5.3654      |
| 27  | A''  | 1554.3672  | 17.2831     | 684.8730  | 2.9920      |
| 28  | A'   | 1571.5616  | 2.8909      | 34.1096   | 0.3242      |
| 29  | A'   | 1628.6333  | 3.6937      | 187.6789  | 5.6390      |
| 30  | A''  | 1689.1421  | 17.7637     | 11.6546   | 0.7525      |
| 31  | A'   | 1712.5938  | 17.3786     | 364.2349  | 24.1882     |
| 32  | A'   | 3650.1131  | 8.2034      | 130.8141  | 134.7891    |

33 A" 3779.6795 9.3134 86.9416 35.2463

py-01\_A\_mp2

| NM# | Symm | Wavenumber | Force Const | IR Intens | Raman Activ |
|-----|------|------------|-------------|-----------|-------------|
| 1   | A"   | 119.0734   | 0.1518      | 0.0267    | 0.0021      |
| 2   | A'   | 154.2202   | 0.1042      | 2.4177    | 0.1967      |
| 3   | A'   | 209.4650   | 0.2915      | 0.9144    | 0.3663      |
| 4   | A"   | 277.6214   | 0.1889      | 4.2158    | 0.7052      |
| 5   | A'   | 282.5171   | 0.8224      | 1.1976    | 0.2113      |
| 6   | A"   | 313.4107   | 0.5745      | 0.1369    | 0.1499      |
| 7   | A'   | 339.8822   | 0.7400      | 1.1863    | 0.5202      |
| 8   | A'   | 349.6813   | 1.0727      | 1.9936    | 0.2343      |
| 9   | A"   | 376.5401   | 0.0997      | 13.5450   | 1.0190      |
| 10  | A"   | 451.8069   | 0.6786      | 2.0402    | 2.0301      |
| 11  | A"   | 463.8974   | 1.9143      | 0.0117    | 5.0646      |
| 12  | A'   | 483.4157   | 1.7460      | 1.0922    | 5.5519      |
| 13  | A'   | 546.8429   | 0.4494      | 113.7990  | 3.1585      |
| 14  | A'   | 572.8840   | 0.6256      | 140.9395  | 3.7347      |
| 15  | A'   | 606.5109   | 1.9234      | 9.2833    | 15.2739     |
| 16  | A"   | 617.1452   | 2.7007      | 0.0114    | 0.0097      |
| 17  | A'   | 623.7772   | 0.9439      | 75.9035   | 8.9494      |
| 18  | A'   | 704.0987   | 4.0569      | 9.9596    | 14.1617     |
| 19  | A"   | 714.8973   | 2.1803      | 0.1214    | 0.1121      |
| 20  | A"   | 929.5656   | 2.3395      | 125.4968  | 0.0078      |
| 21  | A'   | 1112.3659  | 6.3808      | 188.7423  | 0.3874      |
| 22  | A"   | 1150.7549  | 3.7307      | 42.2041   | 0.1739      |
| 23  | A"   | 1218.3619  | 1.8874      | 51.8542   | 0.6627      |
| 24  | A'   | 1297.1032  | 8.8713      | 35.1448   | 3.9614      |
| 25  | A'   | 1445.3510  | 15.0366     | 36.2247   | 7.3167      |
| 26  | A"   | 1461.2817  | 11.4317     | 56.6797   | 15.2733     |
| 27  | A"   | 1529.5699  | 16.4132     | 573.9400  | 5.4456      |
| 28  | A'   | 1569.5787  | 9.8953      | 71.1289   | 4.6758      |
| 29  | A'   | 1646.1958  | 2.1885      | 10.8992   | 0.8073      |
| 30  | A"   | 1670.9924  | 15.4123     | 0.7007    | 0.4650      |
| 31  | A'   | 1708.3873  | 9.1845      | 276.8780  | 36.3028     |
| 32  | A'   | 3604.7541  | 8.0167      | 78.5645   | 164.0025    |
| 33  | A"   | 3723.5775  | 8.9971      | 57.5151   | 36.6030     |

py-01\_A\_o3lyp

| NM# | Symm | Wavenumber | Force Const | IR Intens | Raman Activ |
|-----|------|------------|-------------|-----------|-------------|
| 1   | A"   | 118.3569   | 0.1501      | 0.0123    | 0.0035      |
| 2   | A'   | 153.0159   | 0.1204      | 1.5063    | 0.1890      |
| 3   | A'   | 208.2920   | 0.2475      | 0.6431    | 0.4267      |
| 4   | A"   | 279.1765   | 0.1971      | 4.5619    | 0.7756      |

|    |     |           |         |          |          |
|----|-----|-----------|---------|----------|----------|
| 5  | A'  | 281.6149  | 0.8070  | 1.1173   | 0.2613   |
| 6  | A'' | 313.5578  | 0.5544  | 0.3261   | 0.2065   |
| 7  | A'  | 338.7227  | 0.3186  | 28.0313  | 0.6906   |
| 8  | A'  | 348.0466  | 0.7588  | 10.8833  | 0.6727   |
| 9  | A'  | 367.9584  | 0.1238  | 239.4330 | 1.7479   |
| 10 | A'' | 404.5442  | 0.1618  | 4.2940   | 1.6275   |
| 11 | A'' | 458.7257  | 1.7068  | 0.2878   | 4.4332   |
| 12 | A'' | 462.6453  | 0.2903  | 3.0164   | 1.5211   |
| 13 | A'  | 478.4131  | 1.5142  | 4.5664   | 7.1056   |
| 14 | A'  | 605.2698  | 2.0652  | 6.4813   | 20.9294  |
| 15 | A'  | 636.0590  | 2.7436  | 6.5047   | 0.5267   |
| 16 | A'' | 673.3670  | 3.2372  | 0.0007   | 0.0038   |
| 17 | A'  | 690.1994  | 4.2046  | 3.3326   | 12.4827  |
| 18 | A'' | 718.3034  | 2.0406  | 0.3200   | 0.1669   |
| 19 | A'  | 726.7595  | 3.6727  | 4.7767   | 0.8051   |
| 20 | A'' | 913.6076  | 2.1178  | 133.9472 | 0.0029   |
| 21 | A'  | 1110.7340 | 6.7246  | 199.8006 | 0.2791   |
| 22 | A'' | 1125.0001 | 3.3633  | 67.1590  | 0.5843   |
| 23 | A'' | 1185.2329 | 2.0544  | 59.1750  | 1.0133   |
| 24 | A'  | 1276.7210 | 8.7488  | 51.6345  | 6.2451   |
| 25 | A'' | 1402.7363 | 9.6187  | 18.4866  | 13.6873  |
| 26 | A'  | 1430.5196 | 14.5415 | 29.8589  | 5.9510   |
| 27 | A'' | 1504.1092 | 15.6599 | 640.0537 | 3.3201   |
| 28 | A'  | 1551.9656 | 8.2464  | 87.4989  | 0.3026   |
| 29 | A'  | 1634.8228 | 2.3307  | 8.2338   | 1.2738   |
| 30 | A'' | 1647.6817 | 15.6435 | 7.6331   | 0.5038   |
| 31 | A'  | 1682.4506 | 7.9350  | 354.0776 | 20.0668  |
| 32 | A'  | 3622.7473 | 8.0878  | 89.8212  | 146.5305 |
| 33 | A'' | 3739.9375 | 9.0952  | 62.1642  | 37.3716  |

py-01\_A\_pbe0

| NM# | Symm | Wavenumber | Force Const | IR Intens | Raman Activ |
|-----|------|------------|-------------|-----------|-------------|
| 1   | A''  | 122.5868   | 0.1607      | 0.0105    | 0.0026      |
| 2   | A'   | 157.2942   | 0.1402      | 0.8015    | 0.2033      |
| 3   | A'   | 209.5370   | 0.2196      | 1.5138    | 0.4004      |
| 4   | A''  | 271.4959   | 0.1837      | 4.6860    | 0.7679      |
| 5   | A'   | 279.2586   | 0.7366      | 1.9928    | 0.3230      |
| 6   | A'   | 311.6980   | 0.0731      | 247.3312  | 2.6484      |
| 7   | A''  | 314.6487   | 0.5564      | 0.2224    | 0.1907      |
| 8   | A'   | 347.7339   | 0.8782      | 13.1518   | 0.7060      |
| 9   | A'   | 355.3640   | 0.8498      | 15.8506   | 0.2894      |
| 10  | A''  | 413.1388   | 0.1884      | 3.0398    | 1.7715      |
| 11  | A''  | 466.5112   | 1.7938      | 0.2341    | 4.3069      |
| 12  | A''  | 472.1596   | 0.2610      | 2.9341    | 1.2156      |
| 13  | A'   | 487.0139   | 1.6510      | 2.6549    | 6.1996      |
| 14  | A'   | 618.7860   | 2.2257      | 4.7800    | 19.2822     |
| 15  | A'   | 648.3547   | 2.8081      | 6.1055    | 0.5116      |

|    |     |           |         |          |          |
|----|-----|-----------|---------|----------|----------|
| 16 | A'' | 683.1434  | 3.3326  | 0.0007   | 0.0024   |
| 17 | A'  | 706.3156  | 4.3977  | 2.3405   | 13.2636  |
| 18 | A'' | 726.7614  | 2.0032  | 0.2276   | 0.1548   |
| 19 | A'  | 734.1041  | 3.7762  | 6.6704   | 0.8664   |
| 20 | A'' | 930.8619  | 2.0020  | 115.9032 | 0.0034   |
| 21 | A'  | 1138.4830 | 6.9592  | 201.6232 | 0.2265   |
| 22 | A'' | 1149.4720 | 2.4853  | 93.5870  | 0.1739   |
| 23 | A'' | 1207.1928 | 3.0366  | 32.9981  | 0.9176   |
| 24 | A'  | 1311.7308 | 8.7655  | 53.5040  | 6.1136   |
| 25 | A'' | 1412.9216 | 10.2578 | 14.9209  | 14.9705  |
| 26 | A'  | 1469.7534 | 15.2466 | 33.6490  | 5.4786   |
| 27 | A'' | 1543.9578 | 16.7102 | 654.8449 | 3.1781   |
| 28 | A'  | 1583.7714 | 5.3554  | 74.3087  | 0.6498   |
| 29 | A'  | 1646.7859 | 2.4937  | 62.7511  | 2.3785   |
| 30 | A'' | 1687.2406 | 16.8209 | 9.3362   | 0.5970   |
| 31 | A'  | 1716.1383 | 13.3607 | 363.5773 | 21.5770  |
| 32 | A'  | 3640.8725 | 8.1672  | 104.5785 | 136.6677 |
| 33 | A'' | 3761.5152 | 9.2081  | 73.6457  | 35.0032  |

py-01\_A\_pbe

| NM# | Symm | Wavenumber | Force Const | IR Intens | Raman Activ |
|-----|------|------------|-------------|-----------|-------------|
| 1   | A''  | 114.2558   | 0.1397      | 0.0115    | 0.0038      |
| 2   | A'   | 149.4335   | 0.1232      | 1.1323    | 0.2053      |
| 3   | A'   | 197.9133   | 0.2125      | 0.8126    | 0.4662      |
| 4   | A''  | 262.7573   | 0.1719      | 4.4547    | 0.8636      |
| 5   | A'   | 268.2932   | 0.7304      | 1.2446    | 0.3104      |
| 6   | A''  | 301.5858   | 0.4981      | 0.4436    | 0.2364      |
| 7   | A'   | 324.5135   | 0.1959      | 58.7065   | 0.8931      |
| 8   | A'   | 335.2669   | 0.4737      | 28.3962   | 1.0314      |
| 9   | A'   | 346.5645   | 0.1413      | 177.7874  | 1.2730      |
| 10  | A''  | 395.4647   | 0.2022      | 2.5007    | 1.8369      |
| 11  | A''  | 446.5283   | 1.6910      | 0.2014    | 4.8581      |
| 12  | A''  | 456.0459   | 0.2124      | 3.5544    | 1.0860      |
| 13  | A'   | 466.0064   | 1.4954      | 3.7740    | 8.0781      |
| 14  | A'   | 590.4460   | 1.9891      | 6.8866    | 21.5615     |
| 15  | A'   | 610.1022   | 2.5181      | 6.1949    | 0.4167      |
| 16  | A''  | 639.0003   | 2.9126      | 0.0002    | 0.0057      |
| 17  | A'   | 670.1911   | 3.9466      | 2.6741    | 13.8486     |
| 18  | A'   | 686.1647   | 3.2501      | 3.6000    | 1.0612      |
| 19  | A''  | 694.8202   | 1.8855      | 0.5276    | 0.2095      |
| 20  | A''  | 883.1856   | 1.9750      | 133.9704  | 0.0031      |
| 21  | A'   | 1083.1282  | 6.5114      | 196.2806  | 0.3801      |
| 22  | A''  | 1087.0514  | 3.4937      | 64.2204   | 0.7204      |
| 23  | A''  | 1146.4235  | 1.8321      | 65.9038   | 1.4220      |
| 24  | A'   | 1235.6895  | 7.9891      | 49.8219   | 6.8949      |
| 25  | A'   | 1382.9630  | 13.5262     | 28.4337   | 5.7502      |
| 26  | A''  | 1388.7318  | 9.7598      | 68.7644   | 10.3597     |

|    |     |           |         |          |          |
|----|-----|-----------|---------|----------|----------|
| 27 | A'' | 1457.8499 | 15.0555 | 561.6850 | 5.2669   |
| 28 | A'  | 1514.9493 | 6.7379  | 57.7924  | 0.4981   |
| 29 | A'  | 1582.7599 | 2.1702  | 16.7435  | 1.0769   |
| 30 | A'' | 1596.4067 | 14.6038 | 5.7958   | 0.4789   |
| 31 | A'  | 1638.8431 | 9.0726  | 344.9994 | 16.2399  |
| 32 | A'  | 3523.8169 | 7.6482  | 86.4116  | 155.5341 |
| 33 | A'' | 3639.1447 | 8.6125  | 61.9359  | 38.8579  |

py-01\_A\_rtpss

| NM# | Symm | Wavenumber | Force Const | IR Intens | Raman Activ |
|-----|------|------------|-------------|-----------|-------------|
| 1   | A''  | 116.5497   | 0.1455      | 0.0184    | 0.0031      |
| 2   | A'   | 152.7203   | 0.1138      | 2.2262    | 0.1885      |
| 3   | A'   | 198.9842   | 0.2304      | 0.6716    | 0.4299      |
| 4   | A''  | 253.1947   | 0.1594      | 4.4253    | 0.7511      |
| 5   | A'   | 261.3602   | 0.7001      | 1.3814    | 0.2780      |
| 6   | A''  | 298.0177   | 0.4705      | 0.3972    | 0.2000      |
| 7   | A'   | 328.6815   | 0.6466      | 2.4294    | 0.5315      |
| 8   | A'   | 336.9368   | 0.9865      | 1.3262    | 0.4044      |
| 9   | A''  | 390.2659   | 0.1659      | 5.0399    | 1.7460      |
| 10  | A''  | 447.0615   | 0.7851      | 1.3707    | 3.3554      |
| 11  | A'   | 447.6296   | 0.1896      | 233.1162  | 0.4898      |
| 12  | A''  | 449.2047   | 0.3008      | 3.3587    | 2.7956      |
| 13  | A'   | 471.3505   | 0.5666      | 66.5040   | 9.8975      |
| 14  | A'   | 594.2316   | 1.7435      | 12.7860   | 22.4177     |
| 15  | A'   | 608.3925   | 2.6596      | 3.6218    | 0.3413      |
| 16  | A''  | 634.7317   | 2.8670      | 0.0023    | 0.0041      |
| 17  | A'   | 671.6190   | 3.2469      | 3.7108    | 1.5543      |
| 18  | A'   | 675.3661   | 3.8642      | 6.7737    | 12.5356     |
| 19  | A''  | 693.9233   | 1.9635      | 0.2723    | 0.2425      |
| 20  | A''  | 890.4683   | 2.1776      | 146.1883  | 0.0039      |
| 21  | A'   | 1084.9662  | 6.3648      | 194.6765  | 0.2525      |
| 22  | A''  | 1097.9802  | 4.9863      | 37.9474   | 1.1339      |
| 23  | A''  | 1165.8922  | 1.6049      | 80.4913   | 0.9252      |
| 24  | A'   | 1238.9594  | 8.3107      | 48.8852   | 6.7381      |
| 25  | A''  | 1388.0856  | 9.1311      | 70.9641   | 10.3078     |
| 26  | A'   | 1388.7022  | 13.7726     | 27.3367   | 5.3127      |
| 27  | A''  | 1468.8260  | 15.2648     | 555.2322  | 5.3278      |
| 28  | A'   | 1522.0063  | 9.6548      | 72.8852   | 0.1882      |
| 29  | A''  | 1608.9137  | 13.8096     | 1.9037    | 0.6814      |
| 30  | A'   | 1618.3738  | 2.4807      | 6.0756    | 1.3375      |
| 31  | A'   | 1659.2834  | 5.3790      | 317.1994  | 18.3250     |
| 32  | A'   | 3512.4582  | 7.6028      | 59.0740   | 160.3810    |
| 33  | A''  | 3623.6169  | 8.5276      | 45.5129   | 44.8291     |

py-01\_A\_tpssh

| NM# | Symm | Wavenumber | Force Const | IR Intens | Raman Activ |
|-----|------|------------|-------------|-----------|-------------|
| 1   | A''  | 119.3575   | 0.1526      | 0.0135    | 0.0030      |
| 2   | A'   | 154.7647   | 0.1241      | 1.5969    | 0.1910      |
| 3   | A'   | 205.2331   | 0.2375      | 0.6964    | 0.4241      |
| 4   | A''  | 260.7787   | 0.1690      | 4.6272    | 0.7691      |
| 5   | A'   | 269.5571   | 0.7421      | 1.2967    | 0.2714      |
| 6   | A''  | 305.5542   | 0.5130      | 0.2761    | 0.1993      |
| 7   | A'   | 336.0649   | 0.4644      | 11.1567   | 0.5728      |
| 8   | A'   | 343.2860   | 0.9132      | 3.7728    | 0.4831      |
| 9   | A'   | 381.8577   | 0.1184      | 271.5917  | 2.0802      |
| 10  | A''  | 403.7560   | 0.1849      | 3.7692    | 1.7976      |
| 11  | A''  | 456.6918   | 1.6004      | 0.3153    | 4.4607      |
| 12  | A''  | 461.8605   | 0.2502      | 3.7094    | 1.3463      |
| 13  | A'   | 477.5136   | 1.4803      | 5.7573    | 7.4038      |
| 14  | A'   | 604.2804   | 2.0080      | 7.3344    | 21.4138     |
| 15  | A'   | 628.6306   | 2.6807      | 5.7154    | 0.3901      |
| 16  | A''  | 658.1121   | 3.0840      | 0.0019    | 0.0034      |
| 17  | A'   | 688.2221   | 4.1683      | 3.6212    | 12.7971     |
| 18  | A'   | 703.0695   | 3.4549      | 5.4774    | 1.0155      |
| 19  | A''  | 709.1778   | 1.9894      | 0.2886    | 0.2000      |
| 20  | A''  | 906.6245   | 2.1318      | 135.6520  | 0.0055      |
| 21  | A'   | 1106.0898  | 6.6366      | 202.5370  | 0.2283      |
| 22  | A''  | 1120.9610  | 3.9326      | 55.9367   | 0.7380      |
| 23  | A''  | 1181.0227  | 1.8988      | 69.2937   | 0.8356      |
| 24  | A'   | 1268.0818  | 8.7420      | 50.5922   | 6.7599      |
| 25  | A''  | 1392.2385  | 9.2745      | 33.8046   | 12.7201     |
| 26  | A'   | 1419.4101  | 14.3354     | 30.1171   | 5.2833      |
| 27  | A''  | 1497.1716  | 15.6941     | 608.1663  | 4.0729      |
| 28  | A'   | 1546.3654  | 9.1424      | 88.3065   | 0.2910      |
| 29  | A''  | 1638.6039  | 14.8449     | 4.2695    | 0.6372      |
| 30  | A'   | 1638.6317  | 2.4289      | 3.5370    | 1.0717      |
| 31  | A'   | 1680.9681  | 6.5390      | 357.0570  | 20.5549     |
| 32  | A'   | 3579.2138  | 7.8934      | 81.4624   | 148.4050    |
| 33  | A''  | 3695.5805  | 8.8804      | 58.8983   | 40.2326     |

py-01\_A\_wb97xd

| NM# | Symm | Wavenumber | Force Const | IR Intens | Raman Activ |
|-----|------|------------|-------------|-----------|-------------|
| 1   | A''  | 123.1724   | 0.1626      | 0.0089    | 0.0029      |
| 2   | A'   | 156.6844   | 0.1470      | 0.5273    | 0.2185      |
| 3   | A'   | 211.0534   | 0.2077      | 2.2303    | 0.3827      |
| 4   | A''  | 277.8597   | 0.1948      | 4.6362    | 0.7930      |
| 5   | A'   | 281.8454   | 0.1699      | 71.4689   | 1.8012      |
| 6   | A'   | 288.8055   | 0.0834      | 194.1360  | 1.8034      |
| 7   | A''  | 317.1108   | 0.5729      | 0.1788    | 0.1856      |
| 8   | A'   | 346.8636   | 0.9690      | 6.1800    | 0.5843      |
| 9   | A'   | 355.6618   | 1.0133      | 7.8050    | 0.2738      |

|    |    |           |         |          |          |
|----|----|-----------|---------|----------|----------|
| 10 | A" | 411.5693  | 0.1697  | 3.1597   | 1.6096   |
| 11 | A" | 468.5343  | 0.8054  | 1.1075   | 2.9217   |
| 12 | A" | 469.6136  | 0.3575  | 1.4944   | 2.5994   |
| 13 | A' | 488.9950  | 1.6809  | 2.1461   | 5.9404   |
| 14 | A' | 617.3039  | 2.2182  | 4.4602   | 19.1043  |
| 15 | A' | 652.3131  | 2.8074  | 6.0913   | 0.5586   |
| 16 | A" | 687.5050  | 3.3755  | 0.0010   | 0.0018   |
| 17 | A' | 706.2606  | 4.4039  | 2.8345   | 13.3667  |
| 18 | A" | 729.4316  | 2.0166  | 0.2498   | 0.1070   |
| 19 | A' | 738.9702  | 3.8336  | 7.8219   | 0.8302   |
| 20 | A" | 928.3833  | 2.0333  | 121.5653 | 0.0132   |
| 21 | A' | 1136.0870 | 6.9102  | 207.8841 | 0.2558   |
| 22 | A" | 1146.1219 | 2.5979  | 93.5539  | 0.3320   |
| 23 | A" | 1203.7875 | 2.9256  | 36.4514  | 0.4793   |
| 24 | A' | 1308.9572 | 8.9735  | 52.1087  | 5.5179   |
| 25 | A" | 1374.7734 | 8.8547  | 6.3823   | 18.7944  |
| 26 | A' | 1463.9580 | 15.0710 | 31.7419  | 5.2283   |
| 27 | A" | 1540.2725 | 16.4786 | 656.5601 | 3.0599   |
| 28 | A' | 1579.4790 | 6.3553  | 98.5878  | 1.9805   |
| 29 | A' | 1652.8965 | 2.3675  | 55.0073  | 2.2743   |
| 30 | A" | 1690.3136 | 16.8211 | 11.9379  | 0.6880   |
| 31 | A' | 1716.3413 | 12.5866 | 380.1028 | 25.5585  |
| 32 | A' | 3647.7412 | 8.1985  | 101.6622 | 129.4530 |
| 33 | A" | 3768.3682 | 9.2435  | 70.9923  | 33.5130  |

py-01\_A\_x3lyp

| NM# | Symm | Wavenumber | Force Const | IR Intens | Raman Activ |
|-----|------|------------|-------------|-----------|-------------|
| 1   | A"   | 122.0249   | 0.1594      | 0.0087    | 0.0032      |
| 2   | A'   | 155.5970   | 0.1513      | 0.5348    | 0.2256      |
| 3   | A'   | 207.0440   | 0.2018      | 1.6651    | 0.4206      |
| 4   | A"   | 273.8891   | 0.1901      | 4.7566    | 0.8181      |
| 5   | A'   | 278.7722   | 0.3870      | 18.3516   | 0.8232      |
| 6   | A'   | 290.1034   | 0.0660      | 239.9517  | 2.5935      |
| 7   | A"   | 312.1688   | 0.5430      | 0.2261    | 0.2123      |
| 8   | A'   | 342.7760   | 0.9500      | 5.3271    | 0.6309      |
| 9   | A'   | 349.8045   | 0.9626      | 8.7617    | 0.2780      |
| 10  | A"   | 411.2320   | 0.2167      | 2.0727    | 1.8931      |
| 11  | A"   | 464.2630   | 1.8160      | 0.2252    | 4.4966      |
| 12  | A"   | 470.7360   | 0.2241      | 2.8821    | 1.0379      |
| 13  | A'   | 484.8558   | 1.6703      | 2.1795    | 6.6870      |
| 14  | A'   | 609.5512   | 2.1485      | 5.0317    | 20.5370     |
| 15  | A'   | 644.8804   | 2.7696      | 7.0549    | 0.5895      |
| 16  | A"   | 676.9327   | 3.2745      | 0.0001    | 0.0035      |
| 17  | A'   | 696.9936   | 4.2975      | 3.0012    | 12.8307     |
| 18  | A"   | 719.7219   | 1.9762      | 0.4130    | 0.1391      |
| 19  | A'   | 733.2082   | 3.7418      | 6.3676    | 0.9448      |
| 20  | A"   | 912.4235   | 2.0582      | 129.0852  | 0.0115      |

|    |     |           |         |          |          |
|----|-----|-----------|---------|----------|----------|
| 21 | A'  | 1117.8115 | 6.7670  | 208.5771 | 0.2527   |
| 22 | A'' | 1126.5917 | 3.1646  | 78.5008  | 0.4955   |
| 23 | A'' | 1184.0334 | 2.2823  | 57.5359  | 0.7070   |
| 24 | A'  | 1283.5049 | 8.9646  | 52.0769  | 6.7042   |
| 25 | A'' | 1374.6867 | 8.9129  | 16.9182  | 14.8661  |
| 26 | A'  | 1432.7161 | 14.4679 | 31.0056  | 5.3800   |
| 27 | A'' | 1508.9744 | 15.8011 | 621.5049 | 3.3440   |
| 28 | A'  | 1553.7883 | 8.0193  | 97.4158  | 0.7119   |
| 29 | A'  | 1639.6665 | 2.3299  | 13.6965  | 1.0951   |
| 30 | A'' | 1650.5685 | 15.4801 | 8.2468   | 0.6486   |
| 31 | A'  | 1685.5249 | 8.4984  | 388.4405 | 23.1376  |
| 32 | A'  | 3610.1697 | 8.0274  | 105.4152 | 138.7867 |
| 33 | A'' | 3727.0479 | 9.0426  | 71.6316  | 36.1719  |

py-01\_B\_b3lyp

| NM# | Symm | Wavenumber | Force Const | IR Intens | Raman Activ |
|-----|------|------------|-------------|-----------|-------------|
| 1   | A    | 121.1489   | 0.1571      | 0.0095    | 0.0031      |
| 2   | A    | 155.2360   | 0.1423      | 0.7224    | 0.2124      |
| 3   | A    | 205.9109   | 0.2096      | 1.2735    | 0.4193      |
| 4   | A    | 275.2810   | 0.1927      | 4.7532    | 0.8068      |
| 5   | A    | 279.8886   | 0.6706      | 3.6669    | 0.4590      |
| 6   | A    | 304.1891   | 0.0693      | 247.0850  | 2.6783      |
| 7   | A    | 312.1516   | 0.5373      | 0.2449    | 0.2142      |
| 8   | A    | 341.7529   | 0.8863      | 10.8023   | 0.6900      |
| 9   | A    | 349.6120   | 0.8659      | 13.3973   | 0.2714      |
| 10  | A    | 409.3056   | 0.2133      | 2.2809    | 1.8927      |
| 11  | A    | 463.8762   | 1.7096      | 0.3017    | 4.4189      |
| 12  | A    | 468.6354   | 0.2258      | 3.0398    | 1.1514      |
| 13  | A    | 485.6508   | 1.6575      | 2.4596    | 6.7591      |
| 14  | A    | 610.0413   | 2.1482      | 5.4495    | 20.5493     |
| 15  | A    | 641.5892   | 2.7634      | 6.6894    | 0.5311      |
| 16  | A    | 673.2524   | 3.2385      | 0.0002    | 0.0036      |
| 17  | A    | 696.2457   | 4.2833      | 3.1958    | 12.9487     |
| 18  | A    | 718.6329   | 1.9866      | 0.4396    | 0.1445      |
| 19  | A    | 729.0303   | 3.7063      | 6.3475    | 0.9167      |
| 20  | A    | 910.8152   | 2.0816      | 132.6779  | 0.0106      |
| 21  | A    | 1116.0097  | 6.7575      | 208.4495  | 0.2468      |
| 22  | A    | 1124.2605  | 3.2926      | 74.1095   | 0.5425      |
| 23  | A    | 1182.4631  | 2.1859      | 60.8034   | 0.6953      |
| 24  | A    | 1281.3575  | 8.9366      | 51.5454   | 6.8236      |
| 25  | A    | 1374.1835  | 8.8427      | 18.5995   | 14.4977     |
| 26  | A    | 1431.7468  | 14.4633     | 32.4281   | 5.2358      |
| 27  | A    | 1504.6273  | 15.7129     | 616.0224  | 3.4541      |
| 28  | A    | 1551.8835  | 8.1320      | 93.4068   | 0.6160      |
| 29  | A    | 1637.3945  | 2.3590      | 9.6408    | 1.0301      |
| 30  | A    | 1645.7646  | 15.2573     | 7.4100    | 0.6915      |
| 31  | A    | 1681.8651  | 7.8910      | 385.5911  | 22.6395     |



|    |   |           |        |          |          |
|----|---|-----------|--------|----------|----------|
| 32 | A | 3605.9928 | 8.0087 | 101.3728 | 139.1219 |
| 33 | A | 3722.4729 | 9.0191 | 69.6058  | 36.3667  |

py-01\_B\_m062x

| NM# | Symm | Wavenumber | Force Const | IR Intens | Raman Activ |
|-----|------|------------|-------------|-----------|-------------|
| 1   | A    | 125.8598   | 0.1695      | 0.0113    | 0.0020      |
| 2   | A    | 159.7886   | 0.1393      | 1.0104    | 0.2173      |
| 3   | A    | 210.3348   | 0.2250      | 1.2560    | 0.4075      |
| 4   | A    | 271.7043   | 0.1877      | 4.6299    | 0.7687      |
| 5   | A    | 279.3328   | 0.7248      | 2.2222    | 0.3288      |
| 6   | A    | 314.5899   | 0.5544      | 0.1078    | 0.1889      |
| 7   | A    | 315.8313   | 0.0773      | 249.3016  | 2.8310      |
| 8   | A    | 348.1625   | 0.8235      | 18.1481   | 0.7189      |
| 9   | A    | 357.1117   | 0.7706      | 22.6630   | 0.3877      |
| 10  | A    | 409.1921   | 0.1589      | 4.2313    | 1.7340      |
| 11  | A    | 466.1241   | 0.3054      | 2.9085    | 0.8906      |
| 12  | A    | 468.9850   | 1.8492      | 0.0059    | 4.6735      |
| 13  | A    | 488.5755   | 1.6330      | 2.8011    | 5.8250      |
| 14  | A    | 620.7333   | 2.2136      | 4.4372    | 17.6333     |
| 15  | A    | 649.2530   | 2.7943      | 5.3047    | 0.4500      |
| 16  | A    | 684.6377   | 3.3447      | 0.0017    | 0.0020      |
| 17  | A    | 712.7652   | 4.4503      | 2.5021    | 14.1100     |
| 18  | A    | 726.4458   | 2.0138      | 0.1380    | 0.1140      |
| 19  | A    | 734.2429   | 3.8229      | 8.7438    | 0.8000      |
| 20  | A    | 940.3234   | 1.9440      | 104.1374  | 0.0033      |
| 21  | A    | 1144.6385  | 6.8370      | 199.0153  | 0.2614      |
| 22  | A    | 1156.6197  | 2.1139      | 103.8379  | 0.1080      |
| 23  | A    | 1224.7679  | 4.3154      | 16.4490   | 0.4514      |
| 24  | A    | 1329.7902  | 8.8052      | 47.8236   | 5.0291      |
| 25  | A    | 1361.7043  | 8.7338      | 5.0088    | 18.5486     |
| 26  | A    | 1485.2855  | 15.5036     | 33.6197   | 5.5862      |
| 27  | A    | 1560.0484  | 17.2073     | 664.0657  | 2.5906      |
| 28  | A    | 1586.2663  | 5.0948      | 93.1527   | 2.9133      |
| 29  | A    | 1646.8945  | 2.5138      | 99.6781   | 5.1306      |
| 30  | A    | 1701.5486  | 17.1977     | 8.8839    | 0.5295      |
| 31  | A    | 1723.6744  | 15.2892     | 341.9931  | 26.0179     |
| 32  | A    | 3625.4886  | 8.0990      | 119.8497  | 138.1787    |
| 33  | A    | 3746.4450  | 9.1364      | 83.3984   | 35.5440     |

py-01\_B\_mp2

| NM# | Symm | Wavenumber | Force Const | IR Intens | Raman Activ |
|-----|------|------------|-------------|-----------|-------------|
| 1   | A    | 119.0733   | 0.1518      | 0.0267    | 0.0021      |
| 2   | A    | 154.2205   | 0.1042      | 2.4177    | 0.1967      |
| 3   | A    | 209.4647   | 0.2915      | 0.9144    | 0.3663      |

|    |   |           |         |          |          |
|----|---|-----------|---------|----------|----------|
| 4  | A | 277.6216  | 0.1889  | 4.2158   | 0.7052   |
| 5  | A | 282.5170  | 0.8224  | 1.1976   | 0.2113   |
| 6  | A | 313.4106  | 0.5745  | 0.1369   | 0.1499   |
| 7  | A | 339.8824  | 0.7400  | 1.1863   | 0.5202   |
| 8  | A | 349.6811  | 1.0727  | 1.9936   | 0.2343   |
| 9  | A | 376.5387  | 0.0997  | 13.5452  | 1.0190   |
| 10 | A | 451.8077  | 0.6787  | 2.0401   | 2.0301   |
| 11 | A | 463.8975  | 1.9143  | 0.0117   | 5.0645   |
| 12 | A | 483.4159  | 1.7460  | 1.0922   | 5.5519   |
| 13 | A | 546.8447  | 0.4493  | 113.8093 | 3.1587   |
| 14 | A | 572.8851  | 0.6257  | 140.9273 | 3.7346   |
| 15 | A | 606.5112  | 1.9234  | 9.2830   | 15.2740  |
| 16 | A | 617.1460  | 2.7007  | 0.0113   | 0.0097   |
| 17 | A | 623.7784  | 0.9439  | 75.9059  | 8.9495   |
| 18 | A | 704.0988  | 4.0569  | 9.9599   | 14.1616  |
| 19 | A | 714.8976  | 2.1803  | 0.1214   | 0.1121   |
| 20 | A | 929.5659  | 2.3395  | 125.4968 | 0.0078   |
| 21 | A | 1112.3662 | 6.3808  | 188.7422 | 0.3874   |
| 22 | A | 1150.7561 | 3.7307  | 42.2040  | 0.1739   |
| 23 | A | 1218.3619 | 1.8874  | 51.8540  | 0.6627   |
| 24 | A | 1297.1029 | 8.8713  | 35.1448  | 3.9614   |
| 25 | A | 1445.3514 | 15.0366 | 36.2254  | 7.3167   |
| 26 | A | 1461.2820 | 11.4317 | 56.6806  | 15.2731  |
| 27 | A | 1529.5715 | 16.4132 | 573.9404 | 5.4457   |
| 28 | A | 1569.5785 | 9.8954  | 71.1285  | 4.6759   |
| 29 | A | 1646.1957 | 2.1885  | 10.8995  | 0.8073   |
| 30 | A | 1670.9930 | 15.4123 | 0.7007   | 0.4651   |
| 31 | A | 1708.3875 | 9.1846  | 276.8770 | 36.3025  |
| 32 | A | 3604.7548 | 8.0167  | 78.5639  | 164.0022 |
| 33 | A | 3723.5781 | 8.9971  | 57.5148  | 36.6032  |

-----

py-04\_A\_b3lyp

| NM# | Symm | Wavenumber | Force Const | IR Intens | Raman Activ |
|-----|------|------------|-------------|-----------|-------------|
| 1   | A    | 98.1305    | 0.1025      | 0.0516    | 0.0667      |
| 2   | A    | 137.6134   | 0.1611      | 0.9949    | 0.2410      |
| 3   | A    | 206.0069   | 0.1198      | 10.4911   | 0.7313      |
| 4   | A    | 221.5454   | 0.4412      | 3.0693    | 1.4333      |
| 5   | A    | 231.6403   | 0.0422      | 219.0687  | 3.7512      |
| 6   | A    | 289.5173   | 0.4551      | 3.0652    | 0.2279      |
| 7   | A    | 312.9588   | 0.3167      | 2.0169    | 0.5306      |
| 8   | A    | 318.2922   | 0.7036      | 0.0182    | 0.3087      |
| 9   | A    | 335.1389   | 0.9324      | 1.7220    | 1.9821      |
| 10  | A    | 395.4141   | 0.4003      | 3.3715    | 0.9694      |
| 11  | A    | 406.7245   | 1.2025      | 1.9430    | 6.2303      |
| 12  | A    | 476.0406   | 1.7701      | 1.6070    | 5.5234      |
| 13  | A    | 487.7920   | 0.1710      | 2.9452    | 0.3171      |
| 14  | A    | 609.5810   | 2.0565      | 3.5335    | 26.6390     |

|    |   |           |         |          |          |
|----|---|-----------|---------|----------|----------|
| 15 | A | 632.2165  | 3.6210  | 7.2324   | 3.7027   |
| 16 | A | 651.0255  | 2.8342  | 5.5162   | 1.1777   |
| 17 | A | 681.1572  | 3.2913  | 0.6166   | 0.1958   |
| 18 | A | 700.1902  | 1.7272  | 1.0575   | 0.2760   |
| 19 | A | 747.3593  | 3.8919  | 10.0429  | 1.4339   |
| 20 | A | 845.3686  | 2.7091  | 105.3062 | 1.6324   |
| 21 | A | 1077.8826 | 5.1532  | 58.9120  | 1.3028   |
| 22 | A | 1115.3780 | 3.8147  | 105.3200 | 0.8566   |
| 23 | A | 1126.7593 | 1.8688  | 122.4006 | 0.7531   |
| 24 | A | 1240.6852 | 6.3332  | 47.3254  | 4.5753   |
| 25 | A | 1364.7266 | 8.6138  | 25.4371  | 20.8829  |
| 26 | A | 1425.6369 | 13.9289 | 72.5921  | 5.9177   |
| 27 | A | 1474.8422 | 12.9610 | 370.3528 | 3.7498   |
| 28 | A | 1528.8933 | 6.9388  | 198.8710 | 1.2218   |
| 29 | A | 1627.0475 | 8.0581  | 41.5652  | 5.9316   |
| 30 | A | 1632.2167 | 3.2958  | 4.6957   | 0.7744   |
| 31 | A | 1669.6384 | 5.7076  | 459.0927 | 17.8075  |
| 32 | A | 3607.3532 | 8.0132  | 93.7924  | 124.1166 |
| 33 | A | 3727.2989 | 9.0461  | 74.0960  | 28.2605  |

py-04\_A\_b3p86

| NM# | Symm | Wavenumber | Force Const | IR Intens | Raman Activ |
|-----|------|------------|-------------|-----------|-------------|
| 1   | A    | 98.7985    | 0.1062      | 0.0739    | 0.0694      |
| 2   | A    | 137.6185   | 0.1727      | 2.2877    | 0.2936      |
| 3   | A    | 206.2001   | 0.0624      | 49.4543   | 1.1986      |
| 4   | A    | 218.4518   | 0.1400      | 50.8488   | 2.8079      |
| 5   | A    | 220.0999   | 0.0663      | 129.5782  | 2.0151      |
| 6   | A    | 284.9209   | 0.3708      | 3.2840    | 0.2479      |
| 7   | A    | 311.1508   | 0.3336      | 1.7277    | 0.3538      |
| 8   | A    | 320.3551   | 0.7084      | 0.0362    | 0.2944      |
| 9   | A    | 336.6349   | 1.0176      | 1.5244    | 1.9930      |
| 10  | A    | 398.2606   | 0.3898      | 3.0517    | 0.9212      |
| 11  | A    | 409.1335   | 1.2300      | 1.8301    | 5.8314      |
| 12  | A    | 475.3578   | 1.7596      | 1.6245    | 5.2561      |
| 13  | A    | 490.9982   | 0.1753      | 2.6143    | 0.2913      |
| 14  | A    | 612.5072   | 2.0962      | 3.2268    | 25.9579     |
| 15  | A    | 635.9133   | 3.6733      | 5.6126    | 3.9046      |
| 16  | A    | 653.7602   | 2.8398      | 5.2625    | 1.1647      |
| 17  | A    | 683.5005   | 3.3056      | 0.4519    | 0.2036      |
| 18  | A    | 702.3394   | 1.7061      | 0.9962    | 0.3088      |
| 19  | A    | 745.5846   | 3.8788      | 10.2733   | 1.3489      |
| 20  | A    | 856.5287   | 2.6187      | 96.2470   | 1.6321      |
| 21  | A    | 1091.7487  | 3.8512      | 61.5942   | 1.4938      |
| 22  | A    | 1125.2830  | 2.1988      | 94.3575   | 1.0243      |
| 23  | A    | 1137.0497  | 3.5895      | 120.6914  | 0.2631      |
| 24  | A    | 1257.1490  | 6.7294      | 46.3148   | 4.6776      |
| 25  | A    | 1396.1293  | 9.8772      | 28.1354   | 20.1813     |

|    |   |           |         |          |          |
|----|---|-----------|---------|----------|----------|
| 26 | A | 1444.7740 | 14.0751 | 73.5722  | 5.5967   |
| 27 | A | 1495.9679 | 12.6318 | 363.3220 | 3.8024   |
| 28 | A | 1546.9150 | 5.2846  | 197.5167 | 0.8976   |
| 29 | A | 1632.5264 | 2.6143  | 61.7654  | 2.8890   |
| 30 | A | 1652.2805 | 15.1957 | 30.3096  | 3.3413   |
| 31 | A | 1687.7748 | 10.2355 | 448.9383 | 17.1865  |
| 32 | A | 3623.2165 | 8.0857  | 96.2375  | 121.1226 |
| 33 | A | 3747.4311 | 9.1438  | 79.0393  | 27.7509  |

py-04\_A\_b3pw91

| NM# | Symm | Wavenumber | Force Const | IR Intens | Raman Activ |
|-----|------|------------|-------------|-----------|-------------|
| 1   | A    | 98.2508    | 0.1039      | 0.0586    | 0.0681      |
| 2   | A    | 137.1612   | 0.1668      | 1.7283    | 0.2752      |
| 3   | A    | 207.4174   | 0.0742      | 36.9047   | 1.0176      |
| 4   | A    | 219.0143   | 0.2727      | 16.0539   | 1.9368      |
| 5   | A    | 221.9761   | 0.0497      | 178.5045  | 2.9443      |
| 6   | A    | 286.1650   | 0.3789      | 3.2710    | 0.2519      |
| 7   | A    | 311.3200   | 0.3360      | 1.7489    | 0.3738      |
| 8   | A    | 320.6087   | 0.7051      | 0.0431    | 0.2945      |
| 9   | A    | 336.3232   | 0.9945      | 1.5489    | 2.0083      |
| 10  | A    | 398.3605   | 0.3724      | 3.1779    | 0.9512      |
| 11  | A    | 408.1948   | 1.2213      | 1.8548    | 5.8194      |
| 12  | A    | 474.2498   | 1.7472      | 1.6342    | 5.2834      |
| 13  | A    | 488.5071   | 0.1761      | 2.7139    | 0.2988      |
| 14  | A    | 610.6257   | 2.0827      | 3.2594    | 26.0741     |
| 15  | A    | 634.2839   | 3.6542      | 5.8069    | 3.8523      |
| 16  | A    | 653.7196   | 2.8349      | 5.4439    | 1.0623      |
| 17  | A    | 684.3302   | 3.3162      | 0.4668    | 0.1985      |
| 18  | A    | 701.9921   | 1.7119      | 0.9739    | 0.3027      |
| 19  | A    | 747.2646   | 3.8910      | 9.9883    | 1.2708      |
| 20  | A    | 854.1207   | 2.6376      | 97.9629   | 1.6419      |
| 21  | A    | 1088.5472  | 4.1788      | 62.5403   | 1.4201      |
| 22  | A    | 1122.8722  | 2.3844      | 92.4334   | 1.0814      |
| 23  | A    | 1133.5902  | 2.9736      | 123.2987  | 0.3194      |
| 24  | A    | 1252.6586  | 6.6258      | 46.1646   | 4.6381      |
| 25  | A    | 1390.7432  | 9.6682      | 25.7288   | 20.4653     |
| 26  | A    | 1439.7663  | 13.9849     | 72.4014   | 5.7500      |
| 27  | A    | 1491.1989  | 12.7595     | 366.1797  | 3.7456      |
| 28  | A    | 1542.8940  | 5.6881      | 200.7989  | 0.9465      |
| 29  | A    | 1632.2799  | 2.5978      | 50.1124   | 3.0580      |
| 30  | A    | 1647.8828  | 14.5599     | 29.3680   | 3.1077      |
| 31  | A    | 1683.4244  | 9.2319      | 450.9331  | 17.4388     |
| 32  | A    | 3622.9309  | 8.0844      | 94.2068   | 121.8671    |
| 33  | A    | 3746.4065  | 9.1383      | 76.6778   | 27.9204     |

py-04\_A\_blyp

| NM# | Symm | Wavenumber | Force Const | IR Intens | Raman Activ |
|-----|------|------------|-------------|-----------|-------------|
| 1   | A    | 92.6062    | 0.0884      | 0.0934    | 0.0596      |
| 2   | A    | 131.9323   | 0.1213      | 0.3978    | 0.1812      |
| 3   | A    | 197.6287   | 0.1865      | 0.8466    | 0.7462      |
| 4   | A    | 211.9804   | 0.4532      | 0.5954    | 1.3058      |
| 5   | A    | 277.9828   | 0.1599      | 56.2183   | 0.7939      |
| 6   | A    | 282.8615   | 0.0734      | 171.5167  | 2.7555      |
| 7   | A    | 300.0529   | 0.2992      | 2.4135    | 0.7820      |
| 8   | A    | 305.3504   | 0.6929      | 0.4549    | 0.3608      |
| 9   | A    | 319.6376   | 0.7500      | 1.7844    | 2.5480      |
| 10  | A    | 378.4980   | 0.3797      | 4.2663    | 0.9152      |
| 11  | A    | 388.1658   | 1.0537      | 3.1802    | 7.8134      |
| 12  | A    | 456.2309   | 1.6258      | 2.2851    | 6.8914      |
| 13  | A    | 469.4314   | 0.1581      | 3.8937    | 0.4677      |
| 14  | A    | 581.8931   | 1.8420      | 5.0642    | 29.0149     |
| 15  | A    | 599.2823   | 3.2095      | 9.4631    | 4.2008      |
| 16  | A    | 614.5684   | 2.5439      | 5.2958    | 0.9499      |
| 17  | A    | 641.4242   | 2.9024      | 0.8937    | 0.1731      |
| 18  | A    | 672.1390   | 1.6400      | 1.0582    | 0.3134      |
| 19  | A    | 701.4811   | 3.3857      | 6.4331    | 1.4264      |
| 20  | A    | 799.4725   | 2.6307      | 119.9635  | 1.5935      |
| 21  | A    | 1015.0538  | 5.8866      | 50.2695   | 1.6766      |
| 22  | A    | 1060.6741  | 6.2211      | 142.4903  | 0.7965      |
| 23  | A    | 1083.1230  | 1.4122      | 97.0234   | 1.2658      |
| 24  | A    | 1172.4891  | 4.6705      | 51.4508   | 4.5988      |
| 25  | A    | 1331.6644  | 7.8955      | 53.9004   | 14.6487     |
| 26  | A    | 1341.8088  | 11.6867     | 65.3304   | 8.0941      |
| 27  | A    | 1399.2504  | 12.6007     | 357.5108  | 6.4744      |
| 28  | A    | 1461.5761  | 7.7884      | 140.6799  | 1.3452      |
| 29  | A    | 1544.6217  | 12.6641     | 18.2587   | 3.3180      |
| 30  | A    | 1568.8616  | 4.0339      | 57.0257   | 5.2372      |
| 31  | A    | 1607.3658  | 2.8082      | 345.7279  | 11.2702     |
| 32  | A    | 3499.5753  | 7.5409      | 74.6633   | 140.4828    |
| 33  | A    | 3614.1624  | 8.4976      | 62.3707   | 31.1697     |

py-04\_A\_bp86

| NM# | Symm | Wavenumber | Force Const | IR Intens | Raman Activ |
|-----|------|------------|-------------|-----------|-------------|
| 1   | A    | 93.2490    | 0.0901      | 0.0882    | 0.0567      |
| 2   | A    | 132.8281   | 0.1184      | 0.4300    | 0.1728      |
| 3   | A    | 198.3631   | 0.1872      | 1.1880    | 0.7350      |
| 4   | A    | 210.9520   | 0.4416      | 0.6275    | 1.2362      |
| 5   | A    | 274.7315   | 0.3389      | 4.0730    | 0.2329      |
| 6   | A    | 293.6158   | 0.0633      | 217.2470  | 3.0082      |
| 7   | A    | 299.2593   | 0.3034      | 2.5751    | 0.3700      |
| 8   | A    | 306.7178   | 0.6289      | 8.1494    | 0.5263      |

|    |   |           |         |          |          |
|----|---|-----------|---------|----------|----------|
| 9  | A | 321.9166  | 0.8626  | 2.0968   | 2.3610   |
| 10 | A | 379.8433  | 0.3571  | 4.3848   | 0.9406   |
| 11 | A | 392.3023  | 1.0782  | 3.2559   | 7.2309   |
| 12 | A | 456.7226  | 1.5864  | 2.5361   | 6.5083   |
| 13 | A | 468.7130  | 0.1616  | 4.0970   | 0.4902   |
| 14 | A | 587.4936  | 1.8935  | 4.6614   | 28.7377  |
| 15 | A | 605.4771  | 3.2901  | 7.4288   | 4.2188   |
| 16 | A | 614.7307  | 2.5564  | 4.6168   | 0.8983   |
| 17 | A | 641.2402  | 2.8915  | 0.6481   | 0.1834   |
| 18 | A | 674.5121  | 1.6344  | 0.9832   | 0.3672   |
| 19 | A | 694.6152  | 3.3363  | 6.7249   | 1.3174   |
| 20 | A | 814.4941  | 2.5514  | 110.1250 | 1.5313   |
| 21 | A | 1034.5935 | 5.1315  | 55.6026  | 1.4503   |
| 22 | A | 1077.1801 | 5.6941  | 118.7332 | 0.9417   |
| 23 | A | 1090.6067 | 1.4506  | 102.1165 | 0.9469   |
| 24 | A | 1191.7492 | 5.3093  | 46.6664  | 4.7857   |
| 25 | A | 1363.3186 | 9.7713  | 61.5345  | 11.2243  |
| 26 | A | 1368.2284 | 11.1730 | 78.1148  | 9.9652   |
| 27 | A | 1422.9363 | 13.0080 | 356.5002 | 6.8362   |
| 28 | A | 1483.5066 | 5.9347  | 135.5372 | 1.2946   |
| 29 | A | 1568.7196 | 5.2549  | 29.5090  | 5.2832   |
| 30 | A | 1572.4500 | 3.5139  | 5.2378   | 0.3282   |
| 31 | A | 1617.7917 | 6.1488  | 405.7598 | 13.1191  |
| 32 | A | 3502.8922 | 7.5583  | 72.0671  | 139.4693 |
| 33 | A | 3622.0397 | 8.5314  | 65.6512  | 31.6385  |

py-04\_A\_bpw91

| NM# | Symm | Wavenumber | Force Const | IR Intens | Raman Activ |
|-----|------|------------|-------------|-----------|-------------|
| 1   | A    | 93.0312    | 0.0896      | 0.0868    | 0.0567      |
| 2   | A    | 132.4854   | 0.1187      | 0.4064    | 0.1776      |
| 3   | A    | 200.0321   | 0.1899      | 1.2442    | 0.7282      |
| 4   | A    | 212.1688   | 0.4439      | 0.6360    | 1.2363      |
| 5   | A    | 276.6853   | 0.3034      | 9.5756    | 0.2570      |
| 6   | A    | 286.7629   | 0.0608      | 218.9330  | 3.1034      |
| 7   | A    | 300.6727   | 0.3093      | 2.2476    | 0.4124      |
| 8   | A    | 308.3196   | 0.7120      | 1.7448    | 0.3888      |
| 9   | A    | 323.1960   | 0.8684      | 1.7867    | 2.3557      |
| 10  | A    | 382.2948   | 0.3473      | 4.1749    | 0.9470      |
| 11  | A    | 393.3151   | 1.0953      | 2.9612    | 7.0365      |
| 12  | A    | 457.4948   | 1.5980      | 2.4042    | 6.4097      |
| 13  | A    | 470.0274   | 0.1642      | 3.8865    | 0.4642      |
| 14  | A    | 588.7794   | 1.9137      | 4.6605    | 28.1514     |
| 15  | A    | 607.0679   | 3.3073      | 7.2035    | 4.4722      |
| 16  | A    | 618.4132   | 2.5757      | 4.8699    | 0.7946      |
| 17  | A    | 646.4052   | 2.9440      | 0.6532    | 0.1731      |
| 18  | A    | 677.1731   | 1.6466      | 0.9785    | 0.3665      |
| 19  | A    | 702.4345   | 3.4097      | 6.6977    | 1.1915      |

|    |   |           |         |          |          |
|----|---|-----------|---------|----------|----------|
| 20 | A | 816.9612  | 2.5714  | 110.9289 | 1.5516   |
| 21 | A | 1037.2012 | 5.3266  | 55.7834  | 1.4148   |
| 22 | A | 1079.5501 | 5.9950  | 123.2172 | 0.8813   |
| 23 | A | 1093.3595 | 1.4309  | 100.6198 | 1.0327   |
| 24 | A | 1194.4117 | 5.3424  | 46.7760  | 4.6997   |
| 25 | A | 1367.6532 | 10.2734 | 55.6506  | 10.1151  |
| 26 | A | 1372.3561 | 10.6744 | 78.7498  | 11.1344  |
| 27 | A | 1426.8939 | 13.1222 | 360.8442 | 6.6945   |
| 28 | A | 1488.4060 | 6.1408  | 135.7689 | 1.2784   |
| 29 | A | 1574.8898 | 7.3926  | 28.8399  | 5.0326   |
| 30 | A | 1579.4073 | 3.0597  | 4.9678   | 0.7218   |
| 31 | A | 1623.4116 | 5.7588  | 406.1331 | 13.1255  |
| 32 | A | 3525.5311 | 7.6559  | 72.7134  | 136.4174 |
| 33 | A | 3644.8039 | 8.6398  | 65.0535  | 30.9050  |

py-04\_A\_camb3lyp

| NM# | Symm | Wavenumber | Force Const | IR Intens | Raman Activ |
|-----|------|------------|-------------|-----------|-------------|
| 1   | A    | 46.1840    | 0.0021      | 181.2363  | 0.0532      |
| 2   | A    | 102.8765   | 0.0583      | 9.4071    | 0.0292      |
| 3   | A    | 149.6623   | 0.0448      | 35.2846   | 0.1210      |
| 4   | A    | 211.3059   | 0.2911      | 0.7562    | 0.6728      |
| 5   | A    | 223.4596   | 0.5025      | 0.7052    | 1.0265      |
| 6   | A    | 290.4719   | 0.4443      | 2.7440    | 0.2443      |
| 7   | A    | 315.8954   | 0.3220      | 1.8080    | 0.4811      |
| 8   | A    | 324.3803   | 0.6948      | 0.1228    | 0.2523      |
| 9   | A    | 340.3313   | 1.0308      | 1.8206    | 1.8045      |
| 10  | A    | 404.2406   | 0.4373      | 2.5628    | 0.7566      |
| 11  | A    | 413.2622   | 1.2730      | 1.3510    | 5.5503      |
| 12  | A    | 481.8967   | 1.8467      | 1.0165    | 4.7669      |
| 13  | A    | 505.3036   | 0.1788      | 0.0586    | 0.0423      |
| 14  | A    | 619.7125   | 2.1710      | 2.6555    | 24.3286     |
| 15  | A    | 644.4367   | 3.7608      | 4.9318    | 4.5847      |
| 16  | A    | 674.2707   | 3.0417      | 5.6565    | 0.6892      |
| 17  | A    | 703.4966   | 3.5184      | 0.4175    | 0.1353      |
| 18  | A    | 708.2210   | 1.6868      | 1.2160    | 0.2036      |
| 19  | A    | 780.1007   | 4.2607      | 13.5148   | 0.5555      |
| 20  | A    | 863.4653   | 2.5901      | 90.6142   | 1.6712      |
| 21  | A    | 1104.9551  | 3.4662      | 58.0234   | 1.6062      |
| 22  | A    | 1129.5811  | 1.9840      | 106.2907  | 0.8492      |
| 23  | A    | 1145.7068  | 5.6592      | 125.8142  | 0.3017      |
| 24  | A    | 1270.4315  | 7.3897      | 46.0364   | 4.3610      |
| 25  | A    | 1357.2578  | 8.8511      | 18.1268   | 27.3729     |
| 26  | A    | 1459.0231  | 14.1338     | 73.4740   | 5.2977      |
| 27  | A    | 1511.2570  | 12.5206     | 348.1237  | 2.9471      |
| 28  | A    | 1556.0972  | 5.4956      | 234.1069  | 1.9565      |
| 29  | A    | 1648.1659  | 2.5341      | 93.9188   | 3.1007      |
| 30  | A    | 1673.2993  | 16.2996     | 43.0179   | 3.7263      |

|    |   |           |         |          |          |
|----|---|-----------|---------|----------|----------|
| 31 | A | 1703.9095 | 12.4521 | 472.1280 | 21.7608  |
| 32 | A | 3639.4071 | 8.1539  | 118.6481 | 113.0748 |
| 33 | A | 3761.8974 | 9.2263  | 88.0562  | 25.4759  |

py-04\_A\_m062x

| NM# | Symm | Wavenumber | Force Const | IR Intens | Raman Activ |
|-----|------|------------|-------------|-----------|-------------|
| 1   | A    | 101.2523   | 0.1064      | 0.0579    | 0.0797      |
| 2   | A    | 142.0156   | 0.1667      | 0.8136    | 0.2425      |
| 3   | A    | 208.9668   | 0.0919      | 23.9176   | 0.9391      |
| 4   | A    | 222.4102   | 0.3312      | 12.1317   | 1.7224      |
| 5   | A    | 227.1127   | 0.0468      | 207.6200  | 2.3068      |
| 6   | A    | 290.0537   | 0.4666      | 3.1403    | 0.2058      |
| 7   | A    | 317.1693   | 0.3223      | 1.5130    | 0.4474      |
| 8   | A    | 322.0101   | 0.7004      | 0.0712    | 0.2486      |
| 9   | A    | 341.9514   | 1.0272      | 2.2283    | 1.8008      |
| 10  | A    | 400.0091   | 0.3481      | 4.6481    | 1.1871      |
| 11  | A    | 413.5763   | 1.2210      | 2.0640    | 5.4001      |
| 12  | A    | 480.0022   | 1.6862      | 1.5887    | 4.8296      |
| 13  | A    | 483.6198   | 0.1777      | 3.4113    | 0.1517      |
| 14  | A    | 619.6256   | 2.1456      | 2.6550    | 23.8368     |
| 15  | A    | 645.6824   | 3.7676      | 5.1295    | 4.3702      |
| 16  | A    | 660.8990   | 2.8635      | 4.5041    | 1.0437      |
| 17  | A    | 693.9462   | 3.4188      | 0.2471    | 0.2406      |
| 18  | A    | 707.2016   | 1.7534      | 1.0227    | 0.2561      |
| 19  | A    | 755.3988   | 4.0308      | 13.3671   | 1.0328      |
| 20  | A    | 874.2089   | 2.6036      | 86.0545   | 1.9826      |
| 21  | A    | 1113.3377  | 2.8792      | 67.9112   | 1.8064      |
| 22  | A    | 1137.0640  | 2.2986      | 101.5912  | 0.4973      |
| 23  | A    | 1158.8397  | 4.9933      | 94.5284   | 0.2156      |
| 24  | A    | 1287.8169  | 7.4635      | 39.8668   | 4.1163      |
| 25  | A    | 1353.9897  | 8.8447      | 13.3591   | 26.9395     |
| 26  | A    | 1476.7932  | 14.3435     | 73.9659   | 5.7719      |
| 27  | A    | 1520.7873  | 10.8055     | 287.0584  | 1.7992      |
| 28  | A    | 1562.7362  | 5.6708      | 307.3716  | 2.8801      |
| 29  | A    | 1645.6369  | 2.5421      | 110.2056  | 4.4543      |
| 30  | A    | 1680.8006  | 16.3994     | 52.5273   | 4.7957      |
| 31  | A    | 1708.7382  | 13.6518     | 423.8018  | 21.0165     |
| 32  | A    | 3630.1278  | 8.1168      | 117.4115  | 123.2448    |
| 33  | A    | 3754.3629  | 9.1811      | 87.6979   | 28.2898     |

py-04\_A\_mn15

| NM# | Symm | Wavenumber | Force Const | IR Intens | Raman Activ |
|-----|------|------------|-------------|-----------|-------------|
| 1   | A    | 98.7827    | 0.1007      | 7.5636    | 0.0638      |
| 2   | A    | 118.5702   | 0.0224      | 104.4159  | 0.0236      |



|    |   |           |         |          |          |
|----|---|-----------|---------|----------|----------|
| 3  | A | 154.8082  | 0.0238  | 103.2742 | 0.1550   |
| 4  | A | 208.7547  | 0.3200  | 2.4035   | 0.6700   |
| 5  | A | 220.1881  | 0.4961  | 0.7270   | 0.9743   |
| 6  | A | 283.0165  | 0.4311  | 2.8215   | 0.2149   |
| 7  | A | 310.5289  | 0.3045  | 1.7753   | 0.4557   |
| 8  | A | 319.1267  | 0.6714  | 0.0606   | 0.2343   |
| 9  | A | 336.6917  | 1.0257  | 1.8818   | 1.8922   |
| 10 | A | 399.4013  | 0.3838  | 3.2364   | 0.8658   |
| 11 | A | 406.9910  | 1.2062  | 1.4964   | 5.6197   |
| 12 | A | 468.9745  | 1.7113  | 1.3609   | 4.7722   |
| 13 | A | 492.5129  | 0.1755  | 0.0791   | 0.0163   |
| 14 | A | 613.4456  | 2.1571  | 2.2454   | 24.5924  |
| 15 | A | 634.4138  | 3.6625  | 3.6435   | 5.4988   |
| 16 | A | 663.9873  | 2.9895  | 4.7232   | 0.7125   |
| 17 | A | 691.1065  | 3.3978  | 0.3781   | 0.1024   |
| 18 | A | 696.5976  | 1.6152  | 1.0601   | 0.2745   |
| 19 | A | 762.7514  | 4.1047  | 13.9289  | 0.6310   |
| 20 | A | 864.1123  | 2.3608  | 81.7833  | 1.7251   |
| 21 | A | 1094.0554 | 1.7970  | 59.7765  | 2.0899   |
| 22 | A | 1122.7283 | 3.3304  | 130.5553 | 0.2552   |
| 23 | A | 1149.0375 | 6.5916  | 89.0037  | 0.3082   |
| 24 | A | 1273.7869 | 7.4395  | 43.1930  | 4.5355   |
| 25 | A | 1365.5571 | 10.1341 | 19.2607  | 24.9124  |
| 26 | A | 1469.3887 | 13.9214 | 78.3129  | 5.1683   |
| 27 | A | 1514.4739 | 8.7753  | 275.6522 | 2.3541   |
| 28 | A | 1551.7327 | 4.1202  | 285.5620 | 1.4914   |
| 29 | A | 1624.4191 | 3.0017  | 180.6441 | 4.4030   |
| 30 | A | 1671.6758 | 17.1731 | 54.2682  | 4.8602   |
| 31 | A | 1698.6930 | 15.9710 | 427.0744 | 19.6901  |
| 32 | A | 3641.4867 | 8.1658  | 113.3882 | 122.2194 |
| 33 | A | 3770.8252 | 9.2658  | 85.4889  | 28.6828  |

-----

py-04\_A\_mp2

| NM# | Symm | Wavenumber | Force Const | IR Intens | Raman Activ |
|-----|------|------------|-------------|-----------|-------------|
| 1   | A    | 96.5539    | 0.0917      | 0.1711    | 0.0463      |
| 2   | A    | 138.5674   | 0.1001      | 1.4920    | 0.1401      |
| 3   | A    | 198.3483   | 0.2169      | 0.5843    | 0.5955      |
| 4   | A    | 222.6551   | 0.5009      | 0.3483    | 0.9415      |
| 5   | A    | 291.7154   | 0.4482      | 1.7957    | 0.2026      |
| 6   | A    | 302.0643   | 0.5652      | 1.1142    | 0.3694      |
| 7   | A    | 312.8620   | 0.3361      | 0.9573    | 0.3492      |
| 8   | A    | 336.9870   | 0.9899      | 1.3836    | 1.5576      |
| 9   | A    | 378.7996   | 0.1691      | 7.7937    | 1.0301      |
| 10  | A    | 410.3903   | 1.1425      | 1.4820    | 5.3560      |
| 11  | A    | 436.7925   | 0.2154      | 7.8617    | 1.4735      |
| 12  | A    | 475.2238   | 1.7808      | 0.9801    | 4.9975      |
| 13  | A    | 542.7763   | 0.2773      | 206.9916  | 4.2655      |

|    |   |           |         |          |          |
|----|---|-----------|---------|----------|----------|
| 14 | A | 586.0438  | 1.6344  | 43.0053  | 7.3678   |
| 15 | A | 604.9388  | 1.8847  | 9.5365   | 16.5104  |
| 16 | A | 616.1298  | 1.2890  | 40.6369  | 8.7595   |
| 17 | A | 633.4458  | 2.7310  | 2.1535   | 0.6523   |
| 18 | A | 646.2715  | 2.6188  | 25.6484  | 3.1104   |
| 19 | A | 696.7627  | 1.9402  | 1.2177   | 0.4099   |
| 20 | A | 869.8139  | 2.8245  | 96.0899  | 2.4093   |
| 21 | A | 1091.4659 | 7.2087  | 112.4397 | 1.1585   |
| 22 | A | 1122.9248 | 6.8226  | 57.3516  | 0.8557   |
| 23 | A | 1167.7469 | 1.4297  | 68.8084  | 1.7036   |
| 24 | A | 1264.0468 | 5.7437  | 33.0038  | 3.6809   |
| 25 | A | 1438.1613 | 14.7449 | 63.2995  | 8.0392   |
| 26 | A | 1449.1245 | 10.5333 | 64.5992  | 21.7555  |
| 27 | A | 1495.6592 | 13.2294 | 299.3722 | 4.6576   |
| 28 | A | 1545.6703 | 8.5765  | 223.1698 | 6.9491   |
| 29 | A | 1640.6239 | 2.4400  | 16.4925  | 1.9512   |
| 30 | A | 1655.8709 | 14.9985 | 6.9594   | 2.1926   |
| 31 | A | 1695.0474 | 6.9759  | 330.9138 | 27.6880  |
| 32 | A | 3603.2417 | 8.0083  | 71.2912  | 150.2999 |
| 33 | A | 3723.6905 | 8.9987  | 57.0948  | 30.1952  |

py-04\_A\_o3lyp

| NM# | Symm | Wavenumber | Force Const | IR Intens | Raman Activ |
|-----|------|------------|-------------|-----------|-------------|
| 1   | A    | 96.1279    | 0.0935      | 0.1302    | 0.0553      |
| 2   | A    | 136.4674   | 0.1205      | 0.4865    | 0.1621      |
| 3   | A    | 208.9868   | 0.2137      | 1.0161    | 0.6890      |
| 4   | A    | 220.7805   | 0.4804      | 0.6234    | 1.1758      |
| 5   | A    | 289.5133   | 0.1756      | 56.3347   | 0.6554      |
| 6   | A    | 294.9728   | 0.0788      | 182.7082  | 2.5967      |
| 7   | A    | 311.8037   | 0.3373      | 1.9926    | 0.4578      |
| 8   | A    | 319.6234   | 0.7536      | 1.0744    | 0.3545      |
| 9   | A    | 335.1866   | 0.8727      | 2.2620    | 2.0588      |
| 10  | A    | 396.3017   | 0.3232      | 5.1738    | 0.9852      |
| 11  | A    | 404.5878   | 1.1481      | 2.9655    | 6.0823      |
| 12  | A    | 469.7469   | 1.5976      | 2.3785    | 5.6657      |
| 13  | A    | 476.0224   | 0.1773      | 4.2783    | 0.4363      |
| 14  | A    | 603.7310   | 2.0055      | 3.7732    | 27.0246     |
| 15  | A    | 626.8802   | 3.5567      | 6.9638    | 3.2491      |
| 16  | A    | 645.1465   | 2.7809      | 5.6731    | 1.0242      |
| 17  | A    | 680.1077   | 3.2835      | 0.6820    | 0.1808      |
| 18  | A    | 699.2610   | 1.7680      | 0.8121    | 0.2906      |
| 19  | A    | 742.1154   | 3.8173      | 7.9119    | 1.1451      |
| 20  | A    | 846.2804   | 2.7232      | 106.2614  | 1.6325      |
| 21  | A    | 1075.4430  | 5.3076      | 68.0757   | 1.1418      |
| 22  | A    | 1112.4293  | 4.7078      | 98.2582   | 1.0630      |
| 23  | A    | 1128.1280  | 1.6581      | 107.2507  | 0.8432      |
| 24  | A    | 1237.3868  | 5.9542      | 46.2401   | 4.4655      |

|    |   |           |         |          |          |
|----|---|-----------|---------|----------|----------|
| 25 | A | 1391.5394 | 9.3274  | 23.9632  | 19.2037  |
| 26 | A | 1423.1002 | 13.6537 | 71.2671  | 6.8531   |
| 27 | A | 1474.2717 | 12.9558 | 381.0532 | 4.0577   |
| 28 | A | 1529.5116 | 6.9024  | 200.1371 | 0.9485   |
| 29 | A | 1627.1088 | 3.2812  | 37.1832  | 5.3322   |
| 30 | A | 1632.0849 | 7.6799  | 10.9049  | 1.0194   |
| 31 | A | 1670.2741 | 5.9763  | 423.7707 | 15.8512  |
| 32 | A | 3625.8287 | 8.0993  | 84.9025  | 130.4289 |
| 33 | A | 3746.5628 | 9.1324  | 67.0008  | 28.8072  |

py-04\_A\_pbe0

| NM# | Symm | Wavenumber | Force Const | IR Intens | Raman Activ |
|-----|------|------------|-------------|-----------|-------------|
| 1   | A    | 99.7696    | 0.1067      | 0.0534    | 0.0647      |
| 2   | A    | 139.3818   | 0.1664      | 1.2417    | 0.2467      |
| 3   | A    | 208.7916   | 0.0976      | 21.3300   | 0.8153      |
| 4   | A    | 221.2788   | 0.4392      | 2.8487    | 1.3479      |
| 5   | A    | 229.0241   | 0.0443      | 210.7589  | 3.7043      |
| 6   | A    | 287.2762   | 0.3859      | 3.3592    | 0.2424      |
| 7   | A    | 313.8237   | 0.3333      | 1.7282    | 0.3295      |
| 8   | A    | 322.7672   | 0.7252      | 0.0194    | 0.2944      |
| 9   | A    | 339.9341   | 1.0433      | 1.6546    | 1.8387      |
| 10  | A    | 401.3132   | 0.3816      | 3.2970    | 0.9581      |
| 11  | A    | 412.5592   | 1.2439      | 1.8870    | 5.5870      |
| 12  | A    | 478.2286   | 1.7616      | 1.6778    | 5.0913      |
| 13  | A    | 492.1123   | 0.1783      | 2.9759    | 0.3211      |
| 14  | A    | 618.0634   | 2.1433      | 3.1229    | 25.4257     |
| 15  | A    | 641.9413   | 3.7460      | 5.1713    | 3.8947      |
| 16  | A    | 659.5390   | 2.8886      | 5.2970    | 1.1297      |
| 17  | A    | 691.9971   | 3.3982      | 0.4345    | 0.2042      |
| 18  | A    | 707.1283   | 1.7374      | 0.9654    | 0.3045      |
| 19  | A    | 754.9128   | 3.9821      | 10.5900   | 1.2259      |
| 20  | A    | 866.2313   | 2.6259      | 93.6144   | 1.6176      |
| 21  | A    | 1103.7622  | 3.7158      | 65.6568   | 1.5099      |
| 22  | A    | 1134.6491  | 2.1551      | 93.2925   | 0.9950      |
| 23  | A    | 1148.0789  | 4.0150      | 112.7248  | 0.2305      |
| 24  | A    | 1270.6631  | 6.9692      | 45.4901   | 4.6384      |
| 25  | A    | 1403.6592  | 10.0891     | 23.1919   | 21.3834     |
| 26  | A    | 1463.0949  | 14.3729     | 75.7458   | 5.8820      |
| 27  | A    | 1511.0358  | 12.3791     | 359.5062  | 3.3465      |
| 28  | A    | 1559.7367  | 4.9985      | 208.1653  | 1.0476      |
| 29  | A    | 1642.3098  | 2.6749      | 77.9724   | 3.0813      |
| 30  | A    | 1669.7233  | 16.1410     | 35.0939   | 3.6793      |
| 31  | A    | 1701.9659  | 11.5217     | 446.1882  | 17.9235     |
| 32  | A    | 3640.8735  | 8.1653      | 97.8249   | 121.2624    |
| 33  | A    | 3765.8891  | 9.2341      | 79.6050   | 27.6100     |

py-04\_A\_pbe

| NM# | Symm | Wavenumber | Force Const | IR Intens | Raman Activ |
|-----|------|------------|-------------|-----------|-------------|
| 1   | A    | 93.6614    | 0.0917      | 0.0712    | 0.0551      |
| 2   | A    | 133.1575   | 0.1239      | 0.3481    | 0.1799      |
| 3   | A    | 198.9565   | 0.1828      | 1.4487    | 0.7343      |
| 4   | A    | 212.2532   | 0.4468      | 0.6236    | 1.2201      |
| 5   | A    | 275.4168   | 0.1956      | 35.0910   | 0.5109      |
| 6   | A    | 280.5951   | 0.0649      | 191.9438  | 3.0900      |
| 7   | A    | 300.7379   | 0.3001      | 2.3048    | 0.4017      |
| 8   | A    | 307.9345   | 0.7100      | 0.7119    | 0.3651      |
| 9   | A    | 323.6734   | 0.8902      | 1.6397    | 2.3430      |
| 10  | A    | 382.5699   | 0.3721      | 3.7252    | 0.9226      |
| 11  | A    | 394.0148   | 1.1052      | 2.7101    | 6.9758      |
| 12  | A    | 457.5192   | 1.6117      | 2.2919    | 6.3912      |
| 13  | A    | 474.2011   | 0.1635      | 3.8183    | 0.4790      |
| 14  | A    | 590.3123   | 1.9361      | 4.5916    | 27.9524     |
| 15  | A    | 608.0893   | 3.3151      | 6.5195    | 4.6364      |
| 16  | A    | 618.4140   | 2.5725      | 4.9617    | 0.9616      |
| 17  | A    | 647.3373   | 2.9576      | 0.7336    | 0.1775      |
| 18  | A    | 676.6829   | 1.6384      | 0.9973    | 0.3640      |
| 19  | A    | 703.8377   | 3.4194      | 6.3738    | 1.3498      |
| 20  | A    | 819.9325   | 2.5316      | 107.5014  | 1.5211      |
| 21  | A    | 1041.0248  | 5.0598      | 56.0926   | 1.3373      |
| 22  | A    | 1083.4820  | 5.5980      | 116.5345  | 1.0404      |
| 23  | A    | 1093.4769  | 1.4617      | 104.1712  | 0.8478      |
| 24  | A    | 1198.2292  | 5.5094      | 45.3995   | 4.7768      |
| 25  | A    | 1374.3184  | 12.0953     | 55.2229   | 6.8737      |
| 26  | A    | 1378.9943  | 9.6306      | 89.8713   | 14.4354     |
| 27  | A    | 1432.0751  | 13.1930     | 356.1918  | 7.1342      |
| 28  | A    | 1493.0997  | 5.3460      | 129.1729  | 1.2871      |
| 29  | A    | 1574.6681  | 2.5614      | 31.5920   | 3.6539      |
| 30  | A    | 1581.7618  | 11.4184     | 13.5282   | 1.7776      |
| 31  | A    | 1626.6793  | 7.4275      | 406.3334  | 13.3423     |
| 32  | A    | 3519.5047  | 7.6294      | 76.5191   | 139.1987    |
| 33  | A    | 3639.4714  | 8.6157      | 67.8879   | 30.8010     |

py-04\_A\_rtpss

| NM# | Symm | Wavenumber | Force Const | IR Intens | Raman Activ |
|-----|------|------------|-------------|-----------|-------------|
| 1   | A    | 95.8060    | 0.0926      | 0.1842    | 0.0528      |
| 2   | A    | 136.6450   | 0.1090      | 1.1677    | 0.1503      |
| 3   | A    | 200.2021   | 0.2051      | 0.6824    | 0.6926      |
| 4   | A    | 209.0544   | 0.4388      | 0.5938    | 1.1638      |
| 5   | A    | 269.0928   | 0.3510      | 2.4106    | 0.2279      |
| 6   | A    | 297.7705   | 0.2908      | 2.0073    | 0.3537      |
| 7   | A    | 308.6312   | 0.5773      | 1.9814    | 0.3094      |

|    |   |           |         |          |          |
|----|---|-----------|---------|----------|----------|
| 8  | A | 322.8018  | 0.9379  | 0.7658   | 2.4404   |
| 9  | A | 377.1205  | 0.2381  | 25.3672  | 0.7210   |
| 10 | A | 391.5647  | 0.4813  | 41.5839  | 3.5918   |
| 11 | A | 406.8578  | 0.1681  | 194.6805 | 5.5693   |
| 12 | A | 459.5748  | 1.2537  | 10.8528  | 7.0235   |
| 13 | A | 462.1816  | 0.1662  | 7.2876   | 0.5780   |
| 14 | A | 592.7798  | 1.8192  | 6.0714   | 29.4258  |
| 15 | A | 611.6462  | 3.1990  | 9.3987   | 2.7977   |
| 16 | A | 616.8384  | 2.7138  | 3.4975   | 0.6685   |
| 17 | A | 644.4094  | 2.9284  | 0.3691   | 0.1674   |
| 18 | A | 675.9521  | 1.7169  | 0.7999   | 0.4118   |
| 19 | A | 693.4469  | 3.3622  | 7.9267   | 0.8493   |
| 20 | A | 825.3404  | 2.7033  | 114.9837 | 1.5872   |
| 21 | A | 1046.0168 | 5.8457  | 59.9169  | 1.3677   |
| 22 | A | 1086.0934 | 6.1255  | 119.2961 | 0.7862   |
| 23 | A | 1118.4668 | 1.4833  | 86.4365  | 1.2796   |
| 24 | A | 1204.6429 | 4.8736  | 47.2580  | 4.4828   |
| 25 | A | 1377.6096 | 9.4831  | 67.2515  | 11.7461  |
| 26 | A | 1382.5454 | 11.6338 | 75.5119  | 9.0903   |
| 27 | A | 1442.9473 | 13.5209 | 354.9940 | 6.5221   |
| 28 | A | 1500.6406 | 7.7500  | 152.1303 | 1.1597   |
| 29 | A | 1592.1205 | 13.0311 | 14.7772  | 3.8837   |
| 30 | A | 1608.5019 | 2.9816  | 19.5719  | 3.0479   |
| 31 | A | 1648.3013 | 4.2473  | 369.3269 | 13.8863  |
| 32 | A | 3510.0916 | 7.5925  | 53.3150  | 143.6872 |
| 33 | A | 3625.4416 | 8.5380  | 49.9868  | 36.1704  |

py-04\_A\_tpssh

| NM# | Symm | Wavenumber | Force Const | IR Intens | Raman Activ |
|-----|------|------------|-------------|-----------|-------------|
| 1   | A    | 97.7265    | 0.0975      | 0.1273    | 0.0516      |
| 2   | A    | 138.3703   | 0.1243      | 0.5669    | 0.1535      |
| 3   | A    | 206.1360   | 0.2073      | 0.8865    | 0.6749      |
| 4   | A    | 213.0154   | 0.4449      | 0.6818    | 1.1506      |
| 5   | A    | 276.1627   | 0.3432      | 3.1352    | 0.2245      |
| 6   | A    | 303.9146   | 0.3167      | 1.9285    | 0.4080      |
| 7   | A    | 310.9705   | 0.0800      | 196.7358  | 2.3130      |
| 8   | A    | 317.9801   | 0.3547      | 42.7352   | 1.0420      |
| 9   | A    | 329.6579   | 0.8474      | 5.6997    | 1.8456      |
| 10  | A    | 392.5780   | 0.3588      | 6.2897    | 0.9671      |
| 11  | A    | 402.8008   | 1.1134      | 3.9810    | 6.7338      |
| 12  | A    | 468.1896   | 1.6431      | 2.8110    | 5.9114      |
| 13  | A    | 478.7957   | 0.1718      | 4.8026    | 0.4517      |
| 14  | A    | 602.6875   | 1.9719      | 4.0873    | 28.0221     |
| 15  | A    | 624.6419   | 3.5186      | 7.6354    | 3.0523      |
| 16  | A    | 638.2714   | 2.7316      | 5.0288    | 1.1444      |
| 17  | A    | 667.4406   | 3.1425      | 0.4778    | 0.1666      |
| 18  | A    | 690.2699   | 1.7266      | 0.8599    | 0.3644      |

|    |   |           |         |          |          |
|----|---|-----------|---------|----------|----------|
| 19 | A | 724.3339  | 3.6468  | 8.7275   | 1.3658   |
| 20 | A | 840.3499  | 2.7085  | 107.8133 | 1.6134   |
| 21 | A | 1069.0866 | 5.3769  | 63.5894  | 1.3181   |
| 22 | A | 1107.3818 | 5.3397  | 110.6641 | 0.7958   |
| 23 | A | 1128.1262 | 1.6093  | 102.0008 | 0.9860   |
| 24 | A | 1230.2269 | 5.7776  | 46.5161  | 4.5463   |
| 25 | A | 1382.5410 | 9.0064  | 41.5688  | 17.9959  |
| 26 | A | 1412.5066 | 13.6705 | 68.1569  | 5.9961   |
| 27 | A | 1468.4184 | 13.2807 | 375.1764 | 4.6708   |
| 28 | A | 1523.8730 | 7.4487  | 187.2918 | 0.9674   |
| 29 | A | 1620.8353 | 11.9373 | 27.6576  | 4.5375   |
| 30 | A | 1630.1967 | 2.9944  | 10.0461  | 1.7362   |
| 31 | A | 1669.0549 | 5.0287  | 423.2679 | 15.8710  |
| 32 | A | 3577.7360 | 7.8860  | 74.8384  | 132.2859 |
| 33 | A | 3698.4007 | 8.8970  | 63.9686  | 32.1688  |

py-04\_A\_wb97xd

| NM# | Symm | Wavenumber | Force Const | IR Intens | Raman Activ |
|-----|------|------------|-------------|-----------|-------------|
| 1   | A    | 99.4733    | 0.1127      | 0.4260    | 0.0954      |
| 2   | A    | 134.9927   | 0.1453      | 17.7334   | 0.8076      |
| 3   | A    | 179.9013   | 0.0214      | 213.3280  | 4.2055      |
| 4   | A    | 212.6355   | 0.3653      | 4.4042    | 0.8744      |
| 5   | A    | 224.0570   | 0.5206      | 0.8794    | 0.9274      |
| 6   | A    | 293.4476   | 0.4740      | 2.6109    | 0.2048      |
| 7   | A    | 318.8776   | 0.3369      | 1.7412    | 0.4978      |
| 8   | A    | 322.6163   | 0.6958      | 0.0969    | 0.2718      |
| 9   | A    | 340.8370   | 0.9595      | 1.7633    | 1.8193      |
| 10  | A    | 401.3009   | 0.3603      | 3.0273    | 0.8757      |
| 11  | A    | 412.6277   | 1.2293      | 1.6548    | 5.5221      |
| 12  | A    | 479.8251   | 1.7971      | 1.3029    | 4.8926      |
| 13  | A    | 489.0200   | 0.1783      | 2.1069    | 0.2245      |
| 14  | A    | 616.2928   | 2.1265      | 2.7984    | 24.9548     |
| 15  | A    | 641.6767   | 3.7432      | 5.6625    | 3.8711      |
| 16  | A    | 665.2117   | 2.9040      | 5.3376    | 1.3536      |
| 17  | A    | 697.3082   | 3.4506      | 0.2986    | 0.2130      |
| 18  | A    | 710.6044   | 1.7548      | 1.0163    | 0.2150      |
| 19  | A    | 761.7013   | 4.0590      | 12.3941   | 1.3626      |
| 20  | A    | 863.2297   | 2.6757      | 95.6227   | 1.7252      |
| 21  | A    | 1103.1677  | 4.2613      | 65.9075   | 1.4700      |
| 22  | A    | 1132.1656  | 2.1420      | 90.3169   | 0.9776      |
| 23  | A    | 1145.5285  | 3.6244      | 124.7652  | 0.3944      |
| 24  | A    | 1267.7079  | 7.0241      | 45.0644   | 4.1932      |
| 25  | A    | 1366.4865  | 8.8475      | 14.1544   | 26.8271     |
| 26  | A    | 1455.7358  | 14.2042     | 72.9448   | 5.3406      |
| 27  | A    | 1508.3897  | 12.6032     | 359.4433  | 2.7754      |
| 28  | A    | 1555.9416  | 6.0349      | 241.5075  | 1.9984      |
| 29  | A    | 1651.7573  | 2.5379      | 60.7117   | 2.5742      |

|    |   |           |         |          |          |
|----|---|-----------|---------|----------|----------|
| 30 | A | 1672.7339 | 16.2208 | 42.5805  | 3.5302   |
| 31 | A | 1702.7013 | 10.2708 | 473.5128 | 20.8335  |
| 32 | A | 3650.9017 | 8.2100  | 98.4626  | 114.8554 |
| 33 | A | 3775.5556 | 9.2848  | 76.9379  | 26.1156  |

py-04\_A\_x3lyp

| NM# | Symm | Wavenumber | Force Const | IR Intens | Raman Activ |
|-----|------|------------|-------------|-----------|-------------|
| 1   | A    | 98.5841    | 0.1062      | 0.1003    | 0.0774      |
| 2   | A    | 136.9314   | 0.1779      | 3.5859    | 0.3655      |
| 3   | A    | 203.5422   | 0.0369      | 115.0494  | 2.3461      |
| 4   | A    | 213.1247   | 0.0882      | 108.7620  | 3.0715      |
| 5   | A    | 220.1700   | 0.4223      | 3.8183    | 0.8886      |
| 6   | A    | 288.7549   | 0.4373      | 2.9247    | 0.2398      |
| 7   | A    | 312.0394   | 0.3242      | 1.8948    | 0.5293      |
| 8   | A    | 319.8190   | 0.6940      | 0.0800    | 0.2993      |
| 9   | A    | 335.1340   | 0.9316      | 1.6615    | 2.0935      |
| 10  | A    | 397.1938   | 0.4064      | 3.0916    | 0.9311      |
| 11  | A    | 406.4489   | 1.2096      | 1.7805    | 6.1611      |
| 12  | A    | 475.5728   | 1.7855      | 1.4670    | 5.4356      |
| 13  | A    | 490.6234   | 0.1722      | 2.4531    | 0.2911      |
| 14  | A    | 608.2985   | 2.0468      | 3.2761    | 26.6305     |
| 15  | A    | 632.0827   | 3.6259      | 7.0023    | 3.5323      |
| 16  | A    | 654.7617   | 2.8501      | 5.8131    | 1.1946      |
| 17  | A    | 684.9282   | 3.3267      | 0.6454    | 0.1964      |
| 18  | A    | 700.8048   | 1.7131      | 1.0189    | 0.2559      |
| 19  | A    | 751.7783   | 3.9315      | 10.1322   | 1.3983      |
| 20  | A    | 846.0513   | 2.7018      | 102.7910  | 1.6730      |
| 21  | A    | 1079.4560  | 4.8355      | 58.6177   | 1.3284      |
| 22  | A    | 1116.1927  | 3.2141      | 100.5869  | 0.9292      |
| 23  | A    | 1127.5386  | 2.1197      | 127.7413  | 0.6281      |
| 24  | A    | 1242.2929  | 6.3959      | 47.4486   | 4.5301      |
| 25  | A    | 1364.9182  | 8.6995      | 23.8447   | 21.4044     |
| 26  | A    | 1425.1577  | 13.8183     | 70.4016   | 5.9641      |
| 27  | A    | 1478.1149  | 12.8544     | 361.9134  | 3.6427      |
| 28  | A    | 1530.1358  | 6.9697      | 214.9457  | 1.2353      |
| 29  | A    | 1630.8981  | 6.0714      | 45.8951   | 5.9708      |
| 30  | A    | 1635.5393  | 3.6635      | 5.6416    | 0.4240      |
| 31  | A    | 1672.8964  | 6.1929      | 465.1220  | 18.3666     |
| 32  | A    | 3611.9377  | 8.0335      | 98.4154   | 123.5843    |
| 33  | A    | 3732.1844  | 9.0716      | 75.9694   | 27.9958     |

py-04\_B\_b3lyp

| NM# | Symm | Wavenumber | Force Const | IR Intens | Raman Activ |
|-----|------|------------|-------------|-----------|-------------|
| 1   | A    | 98.1304    | 0.1025      | 0.0516    | 0.0667      |

|    |   |           |         |          |          |
|----|---|-----------|---------|----------|----------|
| 2  | A | 137.6133  | 0.1611  | 0.9953   | 0.2410   |
| 3  | A | 206.0066  | 0.1198  | 10.4963  | 0.7314   |
| 4  | A | 221.5453  | 0.4411  | 3.0724   | 1.4335   |
| 5  | A | 231.6341  | 0.0422  | 219.0592 | 3.7510   |
| 6  | A | 289.5173  | 0.4551  | 3.0650   | 0.2279   |
| 7  | A | 312.9588  | 0.3167  | 2.0169   | 0.5307   |
| 8  | A | 318.2923  | 0.7036  | 0.0183   | 0.3086   |
| 9  | A | 335.1389  | 0.9324  | 1.7220   | 1.9821   |
| 10 | A | 395.4143  | 0.4003  | 3.3715   | 0.9694   |
| 11 | A | 406.7245  | 1.2025  | 1.9430   | 6.2303   |
| 12 | A | 476.0406  | 1.7701  | 1.6070   | 5.5234   |
| 13 | A | 487.7927  | 0.1710  | 2.9451   | 0.3171   |
| 14 | A | 609.5810  | 2.0565  | 3.5335   | 26.6390  |
| 15 | A | 632.2165  | 3.6210  | 7.2324   | 3.7026   |
| 16 | A | 651.0256  | 2.8342  | 5.5163   | 1.1777   |
| 17 | A | 681.1573  | 3.2913  | 0.6166   | 0.1958   |
| 18 | A | 700.1902  | 1.7272  | 1.0575   | 0.2760   |
| 19 | A | 747.3593  | 3.8919  | 10.0429  | 1.4339   |
| 20 | A | 845.3684  | 2.7091  | 105.3060 | 1.6324   |
| 21 | A | 1077.8826 | 5.1532  | 58.9125  | 1.3028   |
| 22 | A | 1115.3781 | 3.8146  | 105.3197 | 0.8566   |
| 23 | A | 1126.7594 | 1.8688  | 122.4005 | 0.7531   |
| 24 | A | 1240.6846 | 6.3332  | 47.3252  | 4.5753   |
| 25 | A | 1364.7262 | 8.6138  | 25.4376  | 20.8828  |
| 26 | A | 1425.6367 | 13.9289 | 72.5923  | 5.9177   |
| 27 | A | 1474.8420 | 12.9610 | 370.3529 | 3.7498   |
| 28 | A | 1528.8933 | 6.9388  | 198.8702 | 1.2218   |
| 29 | A | 1627.0472 | 8.0582  | 41.5651  | 5.9316   |
| 30 | A | 1632.2165 | 3.2958  | 4.6957   | 0.7744   |
| 31 | A | 1669.6381 | 5.7076  | 459.0940 | 17.8075  |
| 32 | A | 3607.3534 | 8.0132  | 93.7929  | 124.1166 |
| 33 | A | 3727.2993 | 9.0461  | 74.0961  | 28.2603  |

py-04\_B\_m062x

| NM# | Symm | Wavenumber | Force Const | IR Intens | Raman Activ |
|-----|------|------------|-------------|-----------|-------------|
| 1   | A    | 101.2522   | 0.1064      | 0.0579    | 0.0797      |
| 2   | A    | 142.0158   | 0.1667      | 0.8132    | 0.2425      |
| 3   | A    | 208.9676   | 0.0920      | 23.8917   | 0.9388      |
| 4   | A    | 222.4107   | 0.3316      | 12.0926   | 1.7211      |
| 5   | A    | 227.1207   | 0.0468      | 207.6859  | 2.3081      |
| 6   | A    | 290.0537   | 0.4666      | 3.1405    | 0.2058      |
| 7   | A    | 317.1692   | 0.3223      | 1.5129    | 0.4474      |
| 8   | A    | 322.0101   | 0.7004      | 0.0712    | 0.2486      |
| 9   | A    | 341.9514   | 1.0272      | 2.2284    | 1.8008      |
| 10  | A    | 400.0089   | 0.3481      | 4.6483    | 1.1872      |
| 11  | A    | 413.5763   | 1.2210      | 2.0640    | 5.4001      |
| 12  | A    | 480.0023   | 1.6862      | 1.5888    | 4.8297      |



|    |   |           |         |          |          |
|----|---|-----------|---------|----------|----------|
| 13 | A | 483.6193  | 0.1777  | 3.4114   | 0.1517   |
| 14 | A | 619.6257  | 2.1456  | 2.6550   | 23.8369  |
| 15 | A | 645.6824  | 3.7676  | 5.1295   | 4.3701   |
| 16 | A | 660.8989  | 2.8635  | 4.5041   | 1.0437   |
| 17 | A | 693.9462  | 3.4188  | 0.2471   | 0.2406   |
| 18 | A | 707.2017  | 1.7534  | 1.0227   | 0.2561   |
| 19 | A | 755.3987  | 4.0308  | 13.3671  | 1.0328   |
| 20 | A | 874.2090  | 2.6036  | 86.0545  | 1.9827   |
| 21 | A | 1113.3380 | 2.8792  | 67.9108  | 1.8064   |
| 22 | A | 1137.0645 | 2.2986  | 101.5910 | 0.4972   |
| 23 | A | 1158.8400 | 4.9933  | 94.5282  | 0.2156   |
| 24 | A | 1287.8173 | 7.4635  | 39.8668  | 4.1163   |
| 25 | A | 1353.9894 | 8.8447  | 13.3591  | 26.9397  |
| 26 | A | 1476.7936 | 14.3435 | 73.9658  | 5.7718   |
| 27 | A | 1520.7873 | 10.8055 | 287.0607 | 1.7992   |
| 28 | A | 1562.7366 | 5.6707  | 307.3692 | 2.8800   |
| 29 | A | 1645.6375 | 2.5421  | 110.2046 | 4.4542   |
| 30 | A | 1680.8003 | 16.3993 | 52.5278  | 4.7958   |
| 31 | A | 1708.7385 | 13.6517 | 423.8022 | 21.0164  |
| 32 | A | 3630.1274 | 8.1168  | 117.4112 | 123.2460 |
| 33 | A | 3754.3620 | 9.1810  | 87.6975  | 28.2902  |

py-04\_B\_mp2

| NM# | Symm | Wavenumber | Force Const | IR Intens | Raman Activ |
|-----|------|------------|-------------|-----------|-------------|
| 1   | A    | 96.5539    | 0.0917      | 0.1711    | 0.0463      |
| 2   | A    | 138.5654   | 0.1001      | 1.4920    | 0.1401      |
| 3   | A    | 198.3443   | 0.2169      | 0.5843    | 0.5955      |
| 4   | A    | 222.6546   | 0.5009      | 0.3483    | 0.9415      |
| 5   | A    | 291.7154   | 0.4482      | 1.7956    | 0.2026      |
| 6   | A    | 302.0596   | 0.5652      | 1.1140    | 0.3695      |
| 7   | A    | 312.8619   | 0.3361      | 0.9573    | 0.3492      |
| 8   | A    | 336.9871   | 0.9899      | 1.3836    | 1.5577      |
| 9   | A    | 378.7980   | 0.1691      | 7.7916    | 1.0302      |
| 10  | A    | 410.3904   | 1.1424      | 1.4823    | 5.3559      |
| 11  | A    | 436.7905   | 0.2154      | 7.8634    | 1.4734      |
| 12  | A    | 475.2228   | 1.7808      | 0.9802    | 4.9975      |
| 13  | A    | 542.7661   | 0.2774      | 206.9237  | 4.2648      |
| 14  | A    | 586.0239   | 1.6327      | 43.0852   | 7.3638      |
| 15  | A    | 604.9374   | 1.8849      | 9.5306    | 16.5099     |
| 16  | A    | 616.1244   | 1.2889      | 40.6383   | 8.7629      |
| 17  | A    | 633.4407   | 2.7309      | 2.1542    | 0.6523      |
| 18  | A    | 646.2687   | 2.6191      | 25.6398   | 3.1106      |
| 19  | A    | 696.7620   | 1.9402      | 1.2176    | 0.4099      |
| 20  | A    | 869.8126   | 2.8245      | 96.0909   | 2.4092      |
| 21  | A    | 1091.4661  | 7.2088      | 112.4372  | 1.1585      |
| 22  | A    | 1122.9223  | 6.8230      | 57.3584   | 0.8557      |
| 23  | A    | 1167.7470  | 1.4297      | 68.8053   | 1.7037      |

|    |   |           |         |          |          |
|----|---|-----------|---------|----------|----------|
| 24 | A | 1264.0428 | 5.7437  | 33.0063  | 3.6809   |
| 25 | A | 1438.1605 | 14.7449 | 63.3011  | 8.0391   |
| 26 | A | 1449.1271 | 10.5332 | 64.5953  | 21.7560  |
| 27 | A | 1495.6602 | 13.2296 | 299.3954 | 4.6576   |
| 28 | A | 1545.6684 | 8.5761  | 223.1445 | 6.9489   |
| 29 | A | 1640.6240 | 2.4400  | 16.4898  | 1.9511   |
| 30 | A | 1655.8712 | 14.9982 | 6.9643   | 2.1930   |
| 31 | A | 1695.0466 | 6.9756  | 330.9167 | 27.6877  |
| 32 | A | 3603.2399 | 8.0083  | 71.2921  | 150.3004 |
| 33 | A | 3723.6891 | 8.9986  | 57.0952  | 30.1940  |

py-06\_A\_b3lyp

| NM# | Symm | Wavenumber | Force Const | IR Intens | Raman Activ |
|-----|------|------------|-------------|-----------|-------------|
| 1   | A    | 115.1719   | 0.0861      | 1.3376    | 0.2765      |
| 2   | A    | 122.1114   | 0.1263      | 0.5351    | 0.0831      |
| 3   | A    | 200.2744   | 0.2065      | 0.6248    | 0.2982      |
| 4   | A    | 203.1074   | 0.4697      | 0.4977    | 1.4209      |
| 5   | A    | 281.7985   | 0.5094      | 3.7117    | 0.3101      |
| 6   | A    | 303.5206   | 0.2509      | 4.9276    | 0.7315      |
| 7   | A    | 322.4588   | 0.5389      | 1.5798    | 0.6083      |
| 8   | A    | 323.6884   | 0.7252      | 1.6228    | 1.2276      |
| 9   | A    | 388.4713   | 0.1148      | 211.2779  | 1.0994      |
| 10  | A    | 390.9794   | 0.2141      | 62.6254   | 2.3666      |
| 11  | A    | 428.5890   | 1.5565      | 1.9666    | 3.3933      |
| 12  | A    | 451.9133   | 0.2283      | 30.5188   | 1.1890      |
| 13  | A    | 466.5130   | 0.9416      | 10.2078   | 5.3674      |
| 14  | A    | 551.0451   | 1.5953      | 13.5843   | 24.4677     |
| 15  | A    | 588.6725   | 2.4990      | 10.4825   | 0.3451      |
| 16  | A    | 678.3791   | 1.5474      | 1.1228    | 0.7726      |
| 17  | A    | 691.1505   | 3.2405      | 1.3202    | 0.4327      |
| 18  | A    | 700.6779   | 3.3509      | 8.8652    | 5.9092      |
| 19  | A    | 739.2711   | 3.9043      | 6.0765    | 1.1929      |
| 20  | A    | 911.2684   | 4.9188      | 128.9400  | 5.6297      |
| 21  | A    | 956.6809   | 4.4401      | 114.8346  | 0.5208      |
| 22  | A    | 1105.0323  | 1.3796      | 33.8647   | 1.5578      |
| 23  | A    | 1165.0988  | 7.7045      | 8.5389    | 6.7969      |
| 24  | A    | 1256.5972  | 6.6010      | 78.5614   | 1.2704      |
| 25  | A    | 1333.6872  | 7.4763      | 24.8170   | 4.2018      |
| 26  | A    | 1438.6957  | 9.9325      | 93.7799   | 8.2039      |
| 27  | A    | 1477.1940  | 11.9602     | 71.0265   | 5.3617      |
| 28  | A    | 1508.6384  | 8.7805      | 593.5428  | 1.3871      |
| 29  | A    | 1615.0764  | 13.1265     | 45.9916   | 6.2639      |
| 30  | A    | 1630.7327  | 2.3231      | 79.8147   | 1.3018      |
| 31  | A    | 1672.6433  | 9.0088      | 263.8563  | 23.8835     |
| 32  | A    | 3595.1777  | 7.9635      | 87.0444   | 184.7767    |
| 33  | A    | 3713.7938  | 8.9676      | 56.2548   | 47.3320     |

py-06\_A\_b3p86

| NM# | Symm | Wavenumber | Force Const | IR Intens | Raman Activ |
|-----|------|------------|-------------|-----------|-------------|
| 1   | A    | 115.4961   | 0.0856      | 1.3483    | 0.2785      |
| 2   | A    | 123.3036   | 0.1314      | 0.4985    | 0.0727      |
| 3   | A    | 200.9628   | 0.4612      | 0.4619    | 1.3855      |
| 4   | A    | 202.4055   | 0.2099      | 0.7737    | 0.2982      |
| 5   | A    | 278.4228   | 0.4398      | 4.2490    | 0.3329      |
| 6   | A    | 301.1276   | 0.2547      | 4.6648    | 0.6829      |
| 7   | A    | 324.5486   | 0.5837      | 0.8756    | 0.9932      |
| 8   | A    | 326.0679   | 0.6616      | 2.0382    | 0.7349      |
| 9   | A    | 383.8646   | 0.1085      | 257.7986  | 1.1910      |
| 10  | A    | 393.6728   | 0.2119      | 21.4985   | 2.1688      |
| 11  | A    | 430.7723   | 1.6547      | 1.5825    | 3.2458      |
| 12  | A    | 453.8102   | 0.2491      | 24.4873   | 1.3204      |
| 13  | A    | 466.1206   | 0.9040      | 9.4417    | 5.1537      |
| 14  | A    | 553.7103   | 1.5964      | 12.8368   | 23.1724     |
| 15  | A    | 590.5593   | 2.5175      | 9.8617    | 0.3487      |
| 16  | A    | 680.6424   | 1.5307      | 0.7985    | 0.7033      |
| 17  | A    | 693.0761   | 3.2623      | 1.1979    | 0.3976      |
| 18  | A    | 703.6973   | 3.4832      | 7.8871    | 6.5921      |
| 19  | A    | 737.3497   | 3.8816      | 5.8529    | 1.1449      |
| 20  | A    | 924.4331   | 4.8019      | 125.6823  | 5.9854      |
| 21  | A    | 969.3810   | 4.3093      | 104.2006  | 0.5642      |
| 22  | A    | 1108.5609  | 1.3682      | 35.0208   | 1.3991      |
| 23  | A    | 1186.1939  | 8.0497      | 9.2667    | 6.5540      |
| 24  | A    | 1270.0433  | 6.6713      | 73.6405   | 1.1091      |
| 25  | A    | 1363.8244  | 8.7602      | 38.5727   | 4.4376      |
| 26  | A    | 1458.8322  | 9.0550      | 83.2930   | 7.4833      |
| 27  | A    | 1496.3620  | 12.1652     | 64.3567   | 6.4021      |
| 28  | A    | 1529.7851  | 7.8036      | 588.1197  | 1.1796      |
| 29  | A    | 1629.6466  | 2.4452      | 129.5665  | 0.4537      |
| 30  | A    | 1639.2603  | 10.1935     | 67.1377   | 7.3766      |
| 31  | A    | 1693.5720  | 13.4484     | 233.2396  | 21.8715     |
| 32  | A    | 3615.0447  | 8.0532      | 91.3639   | 180.6268    |
| 33  | A    | 3737.2947  | 9.0813      | 59.8802   | 45.7537     |

py-06\_A\_b3pw91

| NM# | Symm | Wavenumber | Force Const | IR Intens | Raman Activ |
|-----|------|------------|-------------|-----------|-------------|
| 1   | A    | 114.8320   | 0.0841      | 1.3803    | 0.2800      |
| 2   | A    | 122.7807   | 0.1315      | 0.4838    | 0.0712      |
| 3   | A    | 201.6517   | 0.4622      | 0.4669    | 1.3880      |
| 4   | A    | 202.8199   | 0.2112      | 0.7477    | 0.2984      |
| 5   | A    | 279.1306   | 0.4492      | 4.1389    | 0.3213      |
| 6   | A    | 301.8135   | 0.2537      | 4.6795    | 0.7021      |

|    |   |           |         |          |          |
|----|---|-----------|---------|----------|----------|
| 7  | A | 324.4003  | 0.5956  | 0.9044   | 1.0482   |
| 8  | A | 325.9241  | 0.6410  | 2.2387   | 0.6850   |
| 9  | A | 386.0092  | 0.1115  | 222.1556 | 1.0829   |
| 10 | A | 394.4884  | 0.2042  | 53.8577  | 2.2544   |
| 11 | A | 429.7230  | 1.6336  | 1.8884   | 3.2259   |
| 12 | A | 453.6910  | 0.2613  | 26.4915  | 1.4028   |
| 13 | A | 465.2931  | 0.8239  | 12.0173  | 5.1442   |
| 14 | A | 552.3030  | 1.5849  | 13.1128  | 23.3759  |
| 15 | A | 591.3408  | 2.5246  | 9.9925   | 0.3384   |
| 16 | A | 680.0901  | 1.5502  | 0.9652   | 0.8255   |
| 17 | A | 693.6387  | 3.2618  | 1.3119   | 0.4043   |
| 18 | A | 702.2854  | 3.3949  | 7.6982   | 6.3986   |
| 19 | A | 738.6504  | 3.8946  | 5.6754   | 1.1404   |
| 20 | A | 921.3336  | 4.8329  | 126.2611 | 5.9513   |
| 21 | A | 966.2453  | 4.3287  | 106.0187 | 0.5476   |
| 22 | A | 1107.9959 | 1.3662  | 34.7315  | 1.4118   |
| 23 | A | 1181.0432 | 8.0024  | 9.0645   | 6.5405   |
| 24 | A | 1266.0600 | 6.5927  | 74.9405  | 1.1390   |
| 25 | A | 1358.7020 | 8.5469  | 37.6203  | 4.4931   |
| 26 | A | 1453.6397 | 9.3119  | 81.2955  | 7.7922   |
| 27 | A | 1491.7161 | 12.0461 | 66.6545  | 6.0183   |
| 28 | A | 1525.2933 | 8.1327  | 594.0389 | 1.2170   |
| 29 | A | 1629.0187 | 2.8546  | 100.3343 | 0.6062   |
| 30 | A | 1635.3666 | 6.1691  | 79.3902  | 7.0549   |
| 31 | A | 1688.8954 | 12.6466 | 235.4497 | 22.5549  |
| 32 | A | 3613.1316 | 8.0450  | 88.4338  | 181.1819 |
| 33 | A | 3734.8780 | 9.0686  | 57.8604  | 45.9890  |

-----

py-06\_A\_blyp

| NM# | Symm | Wavenumber | Force Const | IR Intens | Raman Activ |
|-----|------|------------|-------------|-----------|-------------|
| 1   | A    | 108.1713   | 0.0760      | 1.3778    | 0.3273      |
| 2   | A    | 116.3602   | 0.1164      | 0.5574    | 0.1027      |
| 3   | A    | 191.1382   | 0.1917      | 0.4906    | 0.3269      |
| 4   | A    | 195.6613   | 0.4363      | 0.4955    | 1.6081      |
| 5   | A    | 271.0760   | 0.4848      | 3.2881    | 0.3362      |
| 6   | A    | 292.8058   | 0.2354      | 4.2465    | 0.8486      |
| 7   | A    | 307.7171   | 0.4882      | 2.1581    | 0.3685      |
| 8   | A    | 309.4561   | 0.6661      | 0.9114    | 1.7980      |
| 9   | A    | 371.2474   | 0.2224      | 3.2053    | 2.1406      |
| 10  | A    | 398.8390   | 0.1333      | 203.4469  | 1.1617      |
| 11  | A    | 410.3241   | 0.8235      | 13.0810   | 3.3096      |
| 12  | A    | 438.1902   | 0.2392      | 47.9611   | 1.7062      |
| 13  | A    | 450.0345   | 0.4617      | 41.0512   | 5.3922      |
| 14  | A    | 524.6026   | 1.4077      | 16.8021   | 29.1322     |
| 15  | A    | 557.5257   | 2.2250      | 10.3427   | 0.4289      |
| 16  | A    | 649.9746   | 1.5010      | 2.4849    | 1.2388      |
| 17  | A    | 652.4834   | 2.9035      | 1.0680    | 0.5805      |

|    |   |           |         |          |          |
|----|---|-----------|---------|----------|----------|
| 18 | A | 668.9565  | 2.7358  | 8.8706   | 4.8813   |
| 19 | A | 696.2313  | 3.4569  | 4.6372   | 1.1441   |
| 20 | A | 862.6463  | 4.6198  | 132.7280 | 5.6681   |
| 21 | A | 908.7408  | 4.2690  | 119.2558 | 0.5912   |
| 22 | A | 1063.1669 | 1.3765  | 25.7935  | 1.8022   |
| 23 | A | 1098.5435 | 5.9539  | 8.6630   | 7.9593   |
| 24 | A | 1190.3922 | 4.9618  | 77.4293  | 1.4918   |
| 25 | A | 1306.3422 | 7.3422  | 17.0155  | 3.3375   |
| 26 | A | 1359.2078 | 9.5405  | 126.7676 | 7.4006   |
| 27 | A | 1402.2030 | 10.6666 | 73.9618  | 4.2330   |
| 28 | A | 1436.2258 | 8.7481  | 513.7883 | 1.1710   |
| 29 | A | 1529.7857 | 13.2336 | 36.3822  | 7.9075   |
| 30 | A | 1572.9568 | 3.2955  | 28.8394  | 2.5225   |
| 31 | A | 1602.7661 | 3.2233  | 268.5253 | 16.7882  |
| 32 | A | 3488.1910 | 7.4950  | 70.2361  | 216.9524 |
| 33 | A | 3602.6049 | 8.4327  | 45.7277  | 54.3895  |

-----

py-06\_A\_bp86

| NM# | Symm | Wavenumber | Force Const | IR Intens | Raman Activ |
|-----|------|------------|-------------|-----------|-------------|
| 1   | A    | 108.1943   | 0.0746      | 1.4291    | 0.3264      |
| 2   | A    | 117.2474   | 0.1200      | 0.5184    | 0.0896      |
| 3   | A    | 192.2146   | 0.1925      | 0.7020    | 0.3196      |
| 4   | A    | 194.5135   | 0.4349      | 0.4599    | 1.5704      |
| 5   | A    | 268.0119   | 0.4081      | 3.8802    | 0.3880      |
| 6   | A    | 290.4645   | 0.2365      | 3.8350    | 0.7494      |
| 7   | A    | 309.6281   | 0.4749      | 2.2913    | 0.3409      |
| 8   | A    | 311.8474   | 0.6716      | 0.8728    | 1.6193      |
| 9   | A    | 372.1122   | 0.1978      | 3.5964    | 1.9965      |
| 10  | A    | 403.8821   | 0.1451      | 177.7853  | 1.1270      |
| 11  | A    | 413.7623   | 0.8306      | 10.6555   | 3.2925      |
| 12  | A    | 439.7457   | 0.2992      | 53.2469   | 2.0880      |
| 13  | A    | 451.2373   | 0.3629      | 64.8458   | 4.9604      |
| 14  | A    | 530.4671   | 1.4226      | 16.0904   | 27.4940     |
| 15  | A    | 557.2390   | 2.2055      | 10.6874   | 0.4566      |
| 16  | A    | 651.4175   | 2.8994      | 0.9081    | 0.5502      |
| 17  | A    | 653.0025   | 1.4565      | 1.5215    | 0.9580      |
| 18  | A    | 672.8542   | 2.9710      | 7.8903    | 5.8432      |
| 19  | A    | 690.7224   | 3.4125      | 4.8798    | 1.2185      |
| 20  | A    | 879.9034   | 4.5314      | 130.4477  | 5.9651      |
| 21  | A    | 924.4293   | 4.2122      | 106.6917  | 0.6707      |
| 22  | A    | 1068.9386  | 1.3122      | 27.7235   | 1.5034      |
| 23  | A    | 1122.6783  | 6.9095      | 8.5411    | 7.8299      |
| 24  | A    | 1206.4621  | 5.2171      | 71.7944   | 1.2695      |
| 25  | A    | 1338.5841  | 8.4608      | 29.3721   | 3.5365      |
| 26  | A    | 1385.0482  | 9.2132      | 124.1326  | 6.6857      |
| 27  | A    | 1424.1525  | 11.4768     | 64.0328   | 5.2855      |
| 28  | A    | 1459.1340  | 7.6918      | 520.5289  | 1.1761      |

|    |   |           |         |          |          |
|----|---|-----------|---------|----------|----------|
| 29 | A | 1553.9892 | 13.2390 | 39.4171  | 6.8775   |
| 30 | A | 1574.0015 | 2.1720  | 65.5199  | 1.2961   |
| 31 | A | 1617.4312 | 8.0973  | 251.5653 | 16.9311  |
| 32 | A | 3496.5673 | 7.5329  | 70.0849  | 214.9207 |
| 33 | A | 3614.4124 | 8.4861  | 47.8158  | 53.3659  |

py-06\_A\_bpw91

| NM# | Symm | Wavenumber | Force Const | IR Intens | Raman Activ |
|-----|------|------------|-------------|-----------|-------------|
| 1   | A    | 107.9152   | 0.0739      | 1.4442    | 0.3244      |
| 2   | A    | 117.2692   | 0.1213      | 0.5033    | 0.0867      |
| 3   | A    | 193.6770   | 0.1950      | 0.6833    | 0.3159      |
| 4   | A    | 196.0724   | 0.4407      | 0.4708    | 1.5593      |
| 5   | A    | 269.7718   | 0.4192      | 3.8150    | 0.3771      |
| 6   | A    | 292.3755   | 0.2386      | 3.9492    | 0.7617      |
| 7   | A    | 311.1097   | 0.4799      | 2.2606    | 0.3437      |
| 8   | A    | 313.1782   | 0.6872      | 0.8635    | 1.5770      |
| 9   | A    | 375.2458   | 0.1936      | 3.6591    | 1.9372      |
| 10  | A    | 402.1996   | 0.1402      | 198.2419  | 1.1398      |
| 11  | A    | 414.7058   | 0.9714      | 8.9095    | 3.2539      |
| 12  | A    | 441.0079   | 0.3057      | 42.6703   | 2.1654      |
| 13  | A    | 451.7783   | 0.3721      | 56.8435   | 4.7881      |
| 14  | A    | 532.0072   | 1.4358      | 15.8286   | 27.1783     |
| 15  | A    | 561.5932   | 2.2518      | 10.4059   | 0.4201      |
| 16  | A    | 655.2824   | 1.4880      | 1.4842    | 1.1123      |
| 17  | A    | 656.6999   | 2.9432      | 1.0984    | 0.5091      |
| 18  | A    | 674.7135   | 2.9312      | 7.7749    | 5.8021      |
| 19  | A    | 697.3669   | 3.4727      | 4.5879    | 1.1408      |
| 20  | A    | 882.5988   | 4.5720      | 131.2529  | 5.9850      |
| 21  | A    | 926.8400   | 4.2565      | 107.9556  | 0.7043      |
| 22  | A    | 1072.6654  | 1.3183      | 28.2845   | 1.4685      |
| 23  | A    | 1124.5867  | 6.9497      | 8.2978    | 7.6710      |
| 24  | A    | 1209.1684  | 5.2507      | 73.1502   | 1.2730      |
| 25  | A    | 1343.0044  | 8.4921      | 30.9680   | 3.7027      |
| 26  | A    | 1388.6687  | 9.4454      | 122.5131  | 6.7639      |
| 27  | A    | 1428.4061  | 11.4808     | 66.5280   | 5.0577      |
| 28  | A    | 1464.0764  | 7.8451      | 518.2941  | 1.0857      |
| 29  | A    | 1559.1531  | 13.5587     | 40.6657   | 7.0485      |
| 30  | A    | 1581.4835  | 2.2098      | 59.0037   | 1.1830      |
| 31  | A    | 1623.1665  | 7.7126      | 255.0218  | 17.2887     |
| 32  | A    | 3518.1128  | 7.6261      | 70.6234   | 209.1233    |
| 33  | A    | 3636.3715  | 8.5899      | 47.5208   | 52.1835     |

py-06\_A\_camb3lyp

| NM# | Symm | Wavenumber | Force Const | IR Intens | Raman Activ |
|-----|------|------------|-------------|-----------|-------------|
|-----|------|------------|-------------|-----------|-------------|

|    |   |           |         |          |          |
|----|---|-----------|---------|----------|----------|
| 1  | A | 118.8497  | 0.0949  | 1.0493   | 0.2486   |
| 2  | A | 125.4085  | 0.1321  | 0.4987   | 0.0815   |
| 3  | A | 203.7769  | 0.4710  | 0.4942   | 1.2947   |
| 4  | A | 204.3977  | 0.2070  | 0.8431   | 0.2806   |
| 5  | A | 283.4188  | 0.4924  | 4.7198   | 0.3275   |
| 6  | A | 304.5335  | 0.2279  | 18.8244  | 0.7923   |
| 7  | A | 326.9097  | 0.4336  | 14.9683  | 0.8735   |
| 8  | A | 329.0990  | 0.5695  | 18.8836  | 1.0467   |
| 9  | A | 337.1783  | 0.0934  | 246.1578 | 1.5396   |
| 10 | A | 402.2074  | 0.2258  | 4.4197   | 2.0874   |
| 11 | A | 435.2359  | 1.8577  | 0.6695   | 3.2688   |
| 12 | A | 459.7981  | 0.2285  | 10.3788  | 1.1778   |
| 13 | A | 472.0900  | 1.1920  | 2.6909   | 5.0258   |
| 14 | A | 560.1403  | 1.6678  | 11.0180  | 22.0827  |
| 15 | A | 605.9882  | 2.6644  | 9.5347   | 0.2948   |
| 16 | A | 686.3946  | 1.5329  | 1.1435   | 0.6608   |
| 17 | A | 710.1130  | 3.4278  | 8.3990   | 4.4143   |
| 18 | A | 713.6242  | 3.6004  | 2.0692   | 2.4366   |
| 19 | A | 765.6532  | 4.1779  | 6.6176   | 1.2182   |
| 20 | A | 934.5590  | 4.8365  | 122.0920 | 5.4537   |
| 21 | A | 976.7676  | 4.4069  | 109.7960 | 0.6261   |
| 22 | A | 1112.6684 | 1.3831  | 45.1227  | 1.6407   |
| 23 | A | 1191.4678 | 8.3261  | 10.2511  | 6.6115   |
| 24 | A | 1282.6934 | 8.9705  | 91.9092  | 1.2274   |
| 25 | A | 1320.5680 | 6.5052  | 23.7943  | 5.3888   |
| 26 | A | 1472.2505 | 8.8708  | 74.8642  | 8.1458   |
| 27 | A | 1513.5375 | 12.6255 | 58.8403  | 6.0091   |
| 28 | A | 1541.7219 | 7.8599  | 608.3380 | 2.5401   |
| 29 | A | 1641.3296 | 2.3060  | 175.7318 | 1.3888   |
| 30 | A | 1662.7936 | 14.4179 | 66.5117  | 8.0365   |
| 31 | A | 1713.8675 | 15.7126 | 234.9553 | 27.5153  |
| 32 | A | 3627.2415 | 8.1050  | 107.9564 | 165.5428 |
| 33 | A | 3747.4238 | 9.1400  | 67.7922  | 42.0268  |

py-06\_A\_m062x

| NM# | Symm | Wavenumber | Force Const | IR Intens | Raman Activ |
|-----|------|------------|-------------|-----------|-------------|
| 1   | A    | 119.9171   | 0.0912      | 1.4576    | 0.2550      |
| 2   | A    | 125.7624   | 0.1339      | 0.5092    | 0.0775      |
| 3   | A    | 201.4091   | 0.4645      | 0.4448    | 1.3311      |
| 4   | A    | 204.2974   | 0.2134      | 0.8096    | 0.3010      |
| 5   | A    | 282.4703   | 0.5567      | 3.5550    | 0.2228      |
| 6   | A    | 306.1642   | 0.2544      | 5.2008    | 0.6479      |
| 7   | A    | 328.1751   | 0.5551      | 1.6152    | 1.1440      |
| 8   | A    | 329.7942   | 0.5879      | 3.8886    | 0.6731      |
| 9   | A    | 390.5394   | 0.1305      | 51.2915   | 1.4167      |
| 10  | A    | 403.7503   | 0.1660      | 210.5991  | 2.4085      |
| 11  | A    | 434.5211   | 1.5399      | 2.0807    | 3.4638      |

|    |   |           |         |          |          |
|----|---|-----------|---------|----------|----------|
| 12 | A | 455.7011  | 0.2964  | 52.2507  | 1.3447   |
| 13 | A | 471.5000  | 0.8780  | 17.6054  | 5.6807   |
| 14 | A | 560.6634  | 1.6064  | 13.2701  | 20.9224  |
| 15 | A | 597.3953  | 2.5617  | 11.7250  | 0.4363   |
| 16 | A | 687.2756  | 1.5589  | 0.7221   | 0.5395   |
| 17 | A | 701.9439  | 3.3564  | 1.2013   | 0.3963   |
| 18 | A | 712.9666  | 3.6918  | 8.7267   | 7.1371   |
| 19 | A | 747.9941  | 4.0120  | 7.3253   | 1.4606   |
| 20 | A | 939.4389  | 4.9489  | 116.1557 | 5.7123   |
| 21 | A | 985.4659  | 4.1481  | 98.0612  | 0.3878   |
| 22 | A | 1120.0129 | 1.3810  | 41.1804  | 1.6467   |
| 23 | A | 1211.0671 | 8.6692  | 12.4804  | 5.9510   |
| 24 | A | 1293.6146 | 9.7970  | 88.1133  | 1.0301   |
| 25 | A | 1320.2121 | 5.8671  | 18.6783  | 4.4301   |
| 26 | A | 1484.5030 | 7.8987  | 32.3918  | 7.5147   |
| 27 | A | 1525.5383 | 12.6222 | 63.9708  | 6.7700   |
| 28 | A | 1550.4852 | 8.7855  | 653.7553 | 3.4158   |
| 29 | A | 1638.7197 | 2.2851  | 196.8184 | 2.7050   |
| 30 | A | 1672.1966 | 15.7437 | 60.9397  | 5.6373   |
| 31 | A | 1717.0806 | 16.5245 | 187.4729 | 28.2567  |
| 32 | A | 3618.3193 | 8.0698  | 104.0003 | 174.4457 |
| 33 | A | 3740.4365 | 9.0974  | 69.1678  | 44.2157  |

py-06\_A\_mn15

| NM# | Symm | Wavenumber | Force Const | IR Intens | Raman Activ |
|-----|------|------------|-------------|-----------|-------------|
| 1   | A    | 117.0483   | 0.0961      | 0.6001    | 0.2997      |
| 2   | A    | 125.0502   | 0.1368      | 0.3836    | 0.0656      |
| 3   | A    | 199.0339   | 0.4523      | 0.5051    | 1.2901      |
| 4   | A    | 201.5952   | 0.1711      | 2.4225    | 0.3074      |
| 5   | A    | 256.2010   | 0.0508      | 249.9572  | 2.4051      |
| 6   | A    | 275.6804   | 0.4811      | 8.6681    | 0.2561      |
| 7   | A    | 300.3315   | 0.2342      | 9.1343    | 0.7007      |
| 8   | A    | 323.5010   | 0.6862      | 2.0888    | 1.3762      |
| 9   | A    | 327.4725   | 0.4733      | 10.2375   | 0.3415      |
| 10  | A    | 398.7674   | 0.2263      | 3.1520    | 2.0845      |
| 11  | A    | 427.6336   | 1.8645      | 0.2464    | 3.5670      |
| 12  | A    | 455.4062   | 0.2749      | 3.3858    | 2.1079      |
| 13  | A    | 459.7579   | 0.5380      | 3.0068    | 4.0534      |
| 14  | A    | 553.1176   | 1.6103      | 10.2442   | 21.3291     |
| 15  | A    | 596.7175   | 2.5867      | 8.1692    | 0.3887      |
| 16  | A    | 673.4409   | 1.4160      | 0.9844    | 0.4898      |
| 17  | A    | 699.6356   | 3.4955      | 6.7167    | 5.1508      |
| 18  | A    | 701.8927   | 3.5478      | 2.9284    | 3.4416      |
| 19  | A    | 750.2586   | 4.0000      | 6.2843    | 1.3514      |
| 20  | A    | 932.9493   | 4.2331      | 117.7475  | 5.4292      |
| 21  | A    | 976.6709   | 3.6981      | 93.9563   | 0.4694      |
| 22  | A    | 1088.1946  | 1.3724      | 51.9154   | 1.3491      |



|    |   |           |         |          |          |
|----|---|-----------|---------|----------|----------|
| 23 | A | 1204.5826 | 8.2583  | 10.9756  | 6.4945   |
| 24 | A | 1280.1656 | 7.9608  | 75.8558  | 1.0042   |
| 25 | A | 1327.7394 | 8.4678  | 48.7926  | 5.1936   |
| 26 | A | 1477.3570 | 6.2110  | 48.0703  | 6.3144   |
| 27 | A | 1516.3112 | 12.6546 | 63.0217  | 8.4650   |
| 28 | A | 1545.0387 | 6.0759  | 554.2476 | 1.4090   |
| 29 | A | 1614.7910 | 2.6418  | 333.5648 | 3.1737   |
| 30 | A | 1660.6357 | 17.1213 | 69.2750  | 6.1823   |
| 31 | A | 1710.6445 | 17.9764 | 204.9536 | 26.1346  |
| 32 | A | 3640.0981 | 8.1620  | 112.5691 | 177.4745 |
| 33 | A | 3770.9344 | 9.2590  | 68.6374  | 45.7562  |

py-06\_A\_mp2

| NM# | Symm | Wavenumber | Force Const | IR Intens | Raman Activ |
|-----|------|------------|-------------|-----------|-------------|
| 1   | A    | 112.5478   | 0.0734      | 1.6229    | 0.2693      |
| 2   | A    | 118.3291   | 0.1334      | 0.3018    | 0.0480      |
| 3   | A    | 196.6670   | 0.2044      | 0.8435    | 0.2885      |
| 4   | A    | 202.3486   | 0.4597      | 0.4936    | 1.3503      |
| 5   | A    | 282.9909   | 0.4738      | 4.0625    | 0.2763      |
| 6   | A    | 300.3807   | 0.5130      | 2.2298    | 0.1514      |
| 7   | A    | 305.2815   | 0.2343      | 3.5933    | 0.6028      |
| 8   | A    | 324.0841   | 0.6747      | 1.1779    | 0.9921      |
| 9   | A    | 360.0092   | 0.1063      | 12.8154   | 1.2562      |
| 10  | A    | 410.2088   | 0.8478      | 5.1732    | 2.0085      |
| 11  | A    | 426.0628   | 0.5064      | 10.1772   | 2.6509      |
| 12  | A    | 432.8446   | 1.9424      | 0.2571    | 3.3219      |
| 13  | A    | 463.6340   | 1.5818      | 0.2202    | 5.0291      |
| 14  | A    | 547.4136   | 1.7388      | 2.9580    | 17.9719     |
| 15  | A    | 577.2548   | 0.7735      | 56.5358   | 4.5978      |
| 16  | A    | 611.2124   | 0.5808      | 168.8855  | 7.1542      |
| 17  | A    | 665.8388   | 1.1022      | 120.0089  | 3.7997      |
| 18  | A    | 677.8251   | 1.4699      | 13.2560   | 0.6795      |
| 19  | A    | 712.9892   | 2.1736      | 28.9516   | 7.7526      |
| 20  | A    | 929.0689   | 4.8753      | 122.0124  | 5.7710      |
| 21  | A    | 967.4011   | 4.7312      | 90.7535   | 0.8115      |
| 22  | A    | 1133.9059  | 1.4630      | 16.3391   | 1.4912      |
| 23  | A    | 1188.0883  | 6.5837      | 9.0685    | 2.7652      |
| 24  | A    | 1276.1499  | 5.0719      | 58.6413   | 0.7460      |
| 25  | A    | 1442.8121  | 10.8178     | 19.5369   | 2.6767      |
| 26  | A    | 1451.9373  | 8.8250      | 68.0351   | 10.8268     |
| 27  | A    | 1496.6927  | 13.4290     | 47.8936   | 7.5360      |
| 28  | A    | 1524.3484  | 9.7887      | 629.2335  | 6.2274      |
| 29  | A    | 1630.5282  | 3.5137      | 42.6346   | 3.1534      |
| 30  | A    | 1644.3881  | 4.2214      | 51.2159   | 7.6143      |
| 31  | A    | 1687.2921  | 10.0225     | 164.8648  | 29.4199     |
| 32  | A    | 3595.8645  | 7.9788      | 64.7051   | 202.4133    |
| 33  | A    | 3717.4170  | 8.9596      | 47.8066   | 44.6604     |

-----  
py-06\_A\_o3lyp  
-----

| NM# | Symm | Wavenumber | Force Const | IR Intens | Raman Activ |
|-----|------|------------|-------------|-----------|-------------|
| 1   | A    | 112.1517   | 0.0782      | 1.5098    | 0.2892      |
| 2   | A    | 120.6587   | 0.1301      | 0.4237    | 0.0733      |
| 3   | A    | 201.9528   | 0.2118      | 0.6408    | 0.3003      |
| 4   | A    | 204.0977   | 0.4715      | 0.4850    | 1.4117      |
| 5   | A    | 281.8198   | 0.5125      | 3.4373    | 0.2545      |
| 6   | A    | 304.8959   | 0.2463      | 4.4349    | 0.7889      |
| 7   | A    | 322.9771   | 0.4996      | 2.7312    | 0.5102      |
| 8   | A    | 324.0478   | 0.7618      | 1.3985    | 1.2574      |
| 9   | A    | 387.3291   | 0.1604      | 8.4835    | 1.7262      |
| 10  | A    | 416.4158   | 0.1857      | 165.1246  | 1.6079      |
| 11  | A    | 426.1142   | 0.8860      | 14.0777   | 2.9995      |
| 12  | A    | 454.1164   | 0.4553      | 39.1976   | 2.5299      |
| 13  | A    | 466.1079   | 0.3100      | 93.8649   | 4.3066      |
| 14  | A    | 547.0271   | 1.5011      | 16.0437   | 24.8331     |
| 15  | A    | 585.2476   | 2.4475      | 11.8495   | 0.3467      |
| 16  | A    | 676.9237   | 1.6373      | 1.6829    | 1.2220      |
| 17  | A    | 688.6955   | 3.2116      | 1.3366    | 0.4394      |
| 18  | A    | 696.0697   | 3.0562      | 7.0802    | 5.3142      |
| 19  | A    | 734.3261   | 3.8520      | 5.0222    | 1.2438      |
| 20  | A    | 910.4049   | 4.8988      | 128.0362  | 5.8719      |
| 21  | A    | 956.0585   | 4.3648      | 109.1685  | 0.5291      |
| 22  | A    | 1107.0720  | 1.3631      | 30.3403   | 1.2982      |
| 23  | A    | 1165.8563  | 7.7426      | 9.1797    | 6.9162      |
| 24  | A    | 1251.3706  | 5.8965      | 74.7892   | 1.0342      |
| 25  | A    | 1361.9129  | 8.4943      | 37.5001   | 4.3566      |
| 26  | A    | 1436.7249  | 9.9098      | 80.4511   | 8.4378      |
| 27  | A    | 1475.6186  | 11.7005     | 75.7076   | 5.1718      |
| 28  | A    | 1509.9163  | 8.8710      | 601.1007  | 1.1844      |
| 29  | A    | 1614.5846  | 12.5825     | 49.8944   | 5.0047      |
| 30  | A    | 1627.6954  | 2.3109      | 76.2276   | 1.6346      |
| 31  | A    | 1672.3300  | 9.4738      | 234.2988  | 22.0323     |
| 32  | A    | 3610.7852  | 8.0371      | 77.1915   | 196.4881    |
| 33  | A    | 3731.6759  | 9.0465      | 50.5654   | 48.4931     |

-----  
py-06\_A\_pbe0  
-----

| NM# | Symm | Wavenumber | Force Const | IR Intens | Raman Activ |
|-----|------|------------|-------------|-----------|-------------|
| 1   | A    | 116.5418   | 0.0862      | 1.3964    | 0.2674      |
| 2   | A    | 124.2463   | 0.1336      | 0.4815    | 0.0697      |
| 3   | A    | 202.7169   | 0.4673      | 0.4484    | 1.3305      |
| 4   | A    | 203.7718   | 0.2128      | 0.8461    | 0.2946      |
| 5   | A    | 280.5114   | 0.4603      | 4.0819    | 0.3014      |

|    |   |           |         |          |          |
|----|---|-----------|---------|----------|----------|
| 6  | A | 303.6088  | 0.2548  | 4.6643   | 0.6486   |
| 7  | A | 327.3443  | 0.5776  | 1.1551   | 0.9245   |
| 8  | A | 328.9184  | 0.6590  | 2.3864   | 0.7307   |
| 9  | A | 392.4055  | 0.1217  | 158.1521 | 1.1148   |
| 10 | A | 397.3954  | 0.1867  | 116.2597 | 2.2775   |
| 11 | A | 433.9803  | 1.6300  | 1.8850   | 3.1870   |
| 12 | A | 456.4793  | 0.2715  | 30.7602  | 1.4182   |
| 13 | A | 468.8029  | 0.8443  | 12.9347  | 5.1699   |
| 14 | A | 559.5248  | 1.6240  | 12.7427  | 22.5209  |
| 15 | A | 595.6463  | 2.5561  | 10.5859  | 0.3456   |
| 16 | A | 685.5642  | 1.5519  | 0.7608   | 0.6486   |
| 17 | A | 700.6844  | 3.3386  | 1.3421   | 0.4091   |
| 18 | A | 709.0836  | 3.5809  | 7.5879   | 6.6065   |
| 19 | A | 746.0287  | 3.9791  | 6.0221   | 1.1953   |
| 20 | A | 935.0766  | 4.8137  | 124.6455 | 5.8461   |
| 21 | A | 978.7484  | 4.3655  | 102.0461 | 0.6183   |
| 22 | A | 1117.3117 | 1.3765  | 35.4360  | 1.3527   |
| 23 | A | 1199.3738 | 8.2451  | 9.6837   | 6.2988   |
| 24 | A | 1282.5126 | 6.9286  | 72.6360  | 1.0012   |
| 25 | A | 1370.1746 | 8.8026  | 42.3423  | 4.6548   |
| 26 | A | 1475.2285 | 8.8080  | 76.0588  | 7.9292   |
| 27 | A | 1511.8069 | 12.1715 | 64.6872  | 6.7763   |
| 28 | A | 1544.0697 | 7.6500  | 592.7885 | 1.4676   |
| 29 | A | 1638.2092 | 2.3532  | 161.5234 | 1.0762   |
| 30 | A | 1656.7078 | 14.2631 | 61.5580  | 6.6056   |
| 31 | A | 1709.0993 | 14.8346 | 220.6372 | 23.1189  |
| 32 | A | 3631.5537 | 8.1281  | 91.1128  | 179.1504 |
| 33 | A | 3754.4796 | 9.1642  | 60.4778  | 45.0708  |

-----

py-06\_A\_pbe

-----

| NM# | Symm | Wavenumber | Force Const | IR Intens | Raman Activ |
|-----|------|------------|-------------|-----------|-------------|
| 1   | A    | 108.5631   | 0.0753      | 1.3956    | 0.3238      |
| 2   | A    | 117.9648   | 0.1216      | 0.5072    | 0.0936      |
| 3   | A    | 192.6720   | 0.1932      | 0.7071    | 0.3229      |
| 4   | A    | 195.3146   | 0.4389      | 0.4615    | 1.5322      |
| 5   | A    | 269.0587   | 0.4326      | 3.6415    | 0.3587      |
| 6   | A    | 292.1190   | 0.2367      | 4.0767    | 0.7497      |
| 7   | A    | 311.1195   | 0.4856      | 2.0291    | 0.3458      |
| 8   | A    | 313.4096   | 0.6738      | 0.8717    | 1.5714      |
| 9   | A    | 374.8907   | 0.2081      | 3.4744    | 2.0540      |
| 10  | A    | 399.3758   | 0.1289      | 219.1331  | 1.0649      |
| 11  | A    | 415.2668   | 1.0976      | 6.3745    | 3.2606      |
| 12  | A    | 440.3349   | 0.2689      | 39.0581   | 1.9658      |
| 13  | A    | 450.7802   | 0.4400      | 39.8347   | 4.9946      |
| 14  | A    | 533.4240   | 1.4525      | 14.9630   | 27.2631     |
| 15  | A    | 559.9182   | 2.2407      | 10.2759   | 0.4535      |
| 16  | A    | 655.1385   | 1.4656      | 1.1618    | 0.9448      |

|    |   |           |         |          |          |
|----|---|-----------|---------|----------|----------|
| 17 | A | 657.5881  | 2.9345  | 1.1733   | 0.5300   |
| 18 | A | 675.0391  | 3.0266  | 7.8817   | 5.7956   |
| 19 | A | 698.2052  | 3.4795  | 4.3032   | 1.1665   |
| 20 | A | 886.5500  | 4.5082  | 129.2736 | 5.8624   |
| 21 | A | 930.3566  | 4.2362  | 104.5025 | 0.7963   |
| 22 | A | 1071.7712 | 1.2998  | 29.1348  | 1.3378   |
| 23 | A | 1129.7759 | 7.1093  | 8.0478   | 7.7196   |
| 24 | A | 1211.7834 | 5.3688  | 70.8670  | 1.1507   |
| 25 | A | 1351.2018 | 8.8004  | 35.8942  | 3.6629   |
| 26 | A | 1394.3256 | 9.1856  | 127.3928 | 6.8911   |
| 27 | A | 1433.6641 | 11.6572 | 60.4554  | 5.4852   |
| 28 | A | 1468.8719 | 7.2290  | 509.8749 | 1.2050   |
| 29 | A | 1564.3556 | 12.3067 | 42.0078  | 6.1161   |
| 30 | A | 1576.6987 | 2.1732  | 86.1282  | 1.8877   |
| 31 | A | 1627.3612 | 9.8631  | 242.9811 | 16.9125  |
| 32 | A | 3512.9261 | 7.6033  | 73.9280  | 214.8572 |
| 33 | A | 3631.8481 | 8.5696  | 49.8257  | 52.5183  |

-----

py-06\_A\_rtpss

| NM# | Symm | Wavenumber | Force Const | IR Intens | Raman Activ |
|-----|------|------------|-------------|-----------|-------------|
| 1   | A    | 111.2758   | 0.0779      | 1.5538    | 0.3007      |
| 2   | A    | 119.7986   | 0.1238      | 0.5180    | 0.0897      |
| 3   | A    | 190.6959   | 0.4228      | 0.4009    | 1.4818      |
| 4   | A    | 193.6423   | 0.1967      | 0.7744    | 0.3017      |
| 5   | A    | 262.1530   | 0.3899      | 3.9032    | 0.3409      |
| 6   | A    | 286.7041   | 0.2318      | 3.3673    | 0.5941      |
| 7   | A    | 311.4698   | 0.4979      | 1.4228    | 1.3183      |
| 8   | A    | 314.0089   | 0.5339      | 3.2427    | 0.5621      |
| 9   | A    | 372.5326   | 0.1766      | 5.9175    | 1.9221      |
| 10  | A    | 416.2612   | 1.7438      | 1.2691    | 3.6365      |
| 11  | A    | 422.4622   | 0.2027      | 24.0828   | 1.2125      |
| 12  | A    | 446.4403   | 1.3978      | 4.0992    | 4.7241      |
| 13  | A    | 504.1421   | 0.2248      | 263.7828  | 2.6083      |
| 14  | A    | 535.3402   | 1.0157      | 43.9056   | 26.8517     |
| 15  | A    | 561.8552   | 1.7474      | 32.6910   | 0.8654      |
| 16  | A    | 653.5140   | 2.9597      | 1.3433    | 0.5046      |
| 17  | A    | 656.0358   | 1.4456      | 0.9356    | 0.4796      |
| 18  | A    | 678.7838   | 3.0419      | 7.7257    | 5.8385      |
| 19  | A    | 691.7927   | 3.3846      | 10.0184   | 1.7511      |
| 20  | A    | 889.6817   | 4.6780      | 133.4704  | 5.7687      |
| 21  | A    | 933.2071   | 4.4701      | 107.7182  | 0.6293      |
| 22  | A    | 1092.8887  | 1.4237      | 19.3708   | 1.7115      |
| 23  | A    | 1133.3317  | 6.4099      | 11.0920   | 7.2496      |
| 24  | A    | 1220.7022  | 4.8232      | 72.8998   | 1.3706      |
| 25  | A    | 1354.5804  | 8.5190      | 18.5070   | 3.1602      |
| 26  | A    | 1401.1114  | 9.4334      | 108.3118  | 6.3875      |
| 27  | A    | 1444.2048  | 11.8864     | 71.0862   | 5.4982      |

|    |   |           |         |          |          |
|----|---|-----------|---------|----------|----------|
| 28 | A | 1475.8646 | 9.0315  | 568.1093 | 1.1460   |
| 29 | A | 1578.9520 | 13.4919 | 27.3605  | 7.8284   |
| 30 | A | 1612.6274 | 2.6237  | 37.5210  | 1.3154   |
| 31 | A | 1644.4509 | 5.0514  | 238.8436 | 18.1496  |
| 32 | A | 3503.4363 | 7.5657  | 48.4022  | 213.9015 |
| 33 | A | 3617.1106 | 8.4894  | 35.8682  | 58.4914  |

py-06\_A\_tpssh

| NM# | Symm | Wavenumber | Force Const | IR Intens | Raman Activ |
|-----|------|------------|-------------|-----------|-------------|
| 1   | A    | 113.7294   | 0.0821      | 1.4802    | 0.2868      |
| 2   | A    | 121.9485   | 0.1291      | 0.4944    | 0.0802      |
| 3   | A    | 195.6229   | 0.4422      | 0.4198    | 1.4256      |
| 4   | A    | 199.4720   | 0.2072      | 0.6866    | 0.2995      |
| 5   | A    | 269.7932   | 0.4009      | 4.1848    | 0.3477      |
| 6   | A    | 293.5062   | 0.2483      | 3.4229    | 0.6256      |
| 7   | A    | 318.1102   | 0.5947      | 0.9501    | 1.3911      |
| 8   | A    | 321.5778   | 0.5526      | 3.0982    | 0.4471      |
| 9   | A    | 386.0844   | 0.1885      | 4.7829    | 1.9580      |
| 10  | A    | 421.1016   | 0.2810      | 87.8786   | 2.2672      |
| 11  | A    | 426.2870   | 0.3208      | 53.3966   | 2.3324      |
| 12  | A    | 452.8632   | 0.5702      | 36.8948   | 2.9287      |
| 13  | A    | 467.8872   | 0.2520      | 146.6202  | 4.0322      |
| 14  | A    | 544.0447   | 1.4495      | 18.2552   | 25.3417     |
| 15  | A    | 579.5986   | 2.3725      | 12.6536   | 0.3932      |
| 16  | A    | 669.3442   | 1.4982      | 0.6960    | 0.5459      |
| 17  | A    | 676.6419   | 3.1359      | 1.1482    | 0.4343      |
| 18  | A    | 692.2766   | 3.3365      | 8.1032    | 6.4819      |
| 19  | A    | 718.3461   | 3.6981      | 6.0937    | 1.1946      |
| 20  | A    | 905.6741   | 4.8035      | 131.5742  | 5.7821      |
| 21  | A    | 950.7037   | 4.4869      | 110.1439  | 0.5432      |
| 22  | A    | 1104.6522  | 1.4031      | 26.6759   | 1.5439      |
| 23  | A    | 1158.0857  | 7.3558      | 9.5010    | 7.0180      |
| 24  | A    | 1246.1240  | 5.6760      | 75.2785   | 1.2600      |
| 25  | A    | 1353.8166  | 8.2835      | 24.8074   | 3.7912      |
| 26  | A    | 1428.8570  | 9.7586      | 90.9343   | 7.1596      |
| 27  | A    | 1469.5299  | 12.1218     | 70.9291   | 5.6514      |
| 28  | A    | 1502.1239  | 9.2247      | 607.3927  | 1.2319      |
| 29  | A    | 1607.8581  | 13.7346     | 36.9793   | 7.0272      |
| 30  | A    | 1632.6417  | 2.4367      | 54.9761   | 1.0685      |
| 31  | A    | 1668.7274  | 6.9218      | 254.8320  | 20.8027     |
| 32  | A    | 3569.7887  | 7.8541      | 69.2752   | 196.7906    |
| 33  | A    | 3688.5077  | 8.8380      | 47.4781   | 52.2927     |

py-06\_A\_wb97xd

| NM# | Symm | Wavenumber | Force Const | IR Intens | Raman Activ |
|-----|------|------------|-------------|-----------|-------------|
|-----|------|------------|-------------|-----------|-------------|

|    |   |           |         |          |          |
|----|---|-----------|---------|----------|----------|
| 1  | A | 117.1189  | 0.0873  | 1.3503   | 0.4950   |
| 2  | A | 123.9374  | 0.1334  | 0.4499   | 9.2049   |
| 3  | A | 203.7625  | 0.4716  | 0.4637   | 1.6444   |
| 4  | A | 205.4112  | 0.2147  | 0.7899   | 0.7210   |
| 5  | A | 284.7851  | 0.5151  | 3.9201   | 0.2945   |
| 6  | A | 307.3204  | 0.2516  | 6.3757   | 0.6753   |
| 7  | A | 327.9985  | 0.6030  | 0.9834   | 1.1125   |
| 8  | A | 329.3431  | 0.6332  | 2.7590   | 0.7335   |
| 9  | A | 377.1538  | 0.1059  | 253.1716 | 1.9632   |
| 10 | A | 398.7746  | 0.1857  | 34.1975  | 2.1383   |
| 11 | A | 433.6727  | 1.7396  | 1.4939   | 2.3644   |
| 12 | A | 456.3917  | 0.2839  | 25.0225  | 1.5964   |
| 13 | A | 470.4836  | 1.0541  | 7.6877   | 5.3681   |
| 14 | A | 557.2251  | 1.6260  | 12.5060  | 24.6172  |
| 15 | A | 600.4068  | 2.6067  | 10.0187  | 12.5571  |
| 16 | A | 687.5698  | 1.6068  | 1.3567   | 0.6091   |
| 17 | A | 705.1627  | 3.3192  | 2.1734   | 4.1380   |
| 18 | A | 710.4129  | 3.4334  | 7.3213   | 3.7296   |
| 19 | A | 752.5202  | 4.0453  | 6.5529   | 69.2025  |
| 20 | A | 929.6617  | 4.9929  | 123.3567 | 9.4149   |
| 21 | A | 974.4152  | 4.3565  | 109.2175 | 0.2930   |
| 22 | A | 1118.0195 | 1.3781  | 41.0198  | 4.7558   |
| 23 | A | 1191.0691 | 8.3522  | 11.4996  | 6.6031   |
| 24 | A | 1279.2638 | 8.0255  | 87.7914  | 13.1600  |
| 25 | A | 1330.2756 | 6.8466  | 31.4327  | 5.3003   |
| 26 | A | 1469.1803 | 9.2404  | 73.0484  | 41.5782  |
| 27 | A | 1509.3904 | 12.3243 | 65.8911  | 20.5907  |
| 28 | A | 1540.5910 | 8.2019  | 617.4017 | 3.4090   |
| 29 | A | 1643.8235 | 2.3231  | 148.0799 | 0.9795   |
| 30 | A | 1661.7664 | 13.1810 | 67.7803  | 11.2705  |
| 31 | A | 1711.5911 | 14.4606 | 226.8131 | 46.9967  |
| 32 | A | 3637.9338 | 8.1571  | 88.5280  | 179.2670 |
| 33 | A | 3760.3238 | 9.1944  | 58.0200  | 41.1187  |

py-06\_A\_x3lyp

| NM# | Symm | Wavenumber | Force Const | IR Intens | Raman Activ |
|-----|------|------------|-------------|-----------|-------------|
| 1   | A    | 115.9967   | 0.0881      | 1.2811    | 0.2731      |
| 2   | A    | 122.8864   | 0.1278      | 0.5313    | 0.0809      |
| 3   | A    | 201.5554   | 0.2106      | 0.5615    | 0.3198      |
| 4   | A    | 201.8586   | 0.4572      | 0.5322    | 1.3863      |
| 5   | A    | 281.1152   | 0.5063      | 3.7755    | 0.2974      |
| 6   | A    | 303.0687   | 0.2508      | 5.2788    | 0.7543      |
| 7   | A    | 323.0039   | 0.6154      | 0.6829    | 1.2564      |
| 8   | A    | 324.7426   | 0.6410      | 2.0817    | 0.6223      |
| 9   | A    | 380.1009   | 0.1064      | 270.2904  | 1.3193      |
| 10  | A    | 392.4763   | 0.2227      | 11.5357   | 2.2691      |

|    |   |           |         |          |          |
|----|---|-----------|---------|----------|----------|
| 11 | A | 428.4777  | 1.6237  | 1.7527   | 3.3425   |
| 12 | A | 452.7029  | 0.2281  | 23.1681  | 1.2355   |
| 13 | A | 466.4924  | 0.9867  | 7.8511   | 5.2889   |
| 14 | A | 549.4419  | 1.5857  | 13.2478  | 24.3367  |
| 15 | A | 591.2401  | 2.5276  | 9.9928   | 0.3100   |
| 16 | A | 678.9404  | 1.5520  | 1.1803   | 0.7970   |
| 17 | A | 694.5625  | 3.2471  | 1.7101   | 0.4953   |
| 18 | A | 701.2398  | 3.3572  | 8.4035   | 5.7961   |
| 19 | A | 742.6910  | 3.9343  | 5.8897   | 1.1737   |
| 20 | A | 911.4554  | 4.9320  | 126.5920 | 5.6194   |
| 21 | A | 957.9668  | 4.3831  | 114.3110 | 0.4642   |
| 22 | A | 1105.2920 | 1.3802  | 34.9858  | 1.5427   |
| 23 | A | 1167.3600 | 7.7918  | 8.7034   | 6.7932   |
| 24 | A | 1258.0296 | 6.7116  | 79.8488  | 1.2586   |
| 25 | A | 1333.1627 | 7.4513  | 26.3771  | 4.3075   |
| 26 | A | 1439.4389 | 9.8084  | 82.3652  | 8.4138   |
| 27 | A | 1479.6526 | 11.9534 | 68.9303  | 5.3448   |
| 28 | A | 1511.3094 | 8.9377  | 611.0049 | 1.4951   |
| 29 | A | 1619.4409 | 12.4904 | 48.3334  | 5.8632   |
| 30 | A | 1633.0328 | 2.3216  | 87.5499  | 1.5718   |
| 31 | A | 1676.3379 | 9.6163  | 260.0988 | 24.4947  |
| 32 | A | 3599.6095 | 7.9833  | 90.4607  | 184.0327 |
| 33 | A | 3718.5306 | 8.9918  | 57.8792  | 46.9753  |

py-06\_B\_b3lyp

| NM# | Symm | Wavenumber | Force Const | IR Intens | Raman Activ |
|-----|------|------------|-------------|-----------|-------------|
| 1   | A    | 115.1720   | 0.0861      | 1.3376    | 0.2765      |
| 2   | A    | 122.1113   | 0.1263      | 0.5351    | 0.0831      |
| 3   | A    | 200.2747   | 0.2065      | 0.6248    | 0.2982      |
| 4   | A    | 203.1074   | 0.4697      | 0.4977    | 1.4209      |
| 5   | A    | 281.7987   | 0.5094      | 3.7117    | 0.3101      |
| 6   | A    | 303.5206   | 0.2509      | 4.9278    | 0.7315      |
| 7   | A    | 322.4590   | 0.5389      | 1.5797    | 0.6083      |
| 8   | A    | 323.6884   | 0.7252      | 1.6227    | 1.2277      |
| 9   | A    | 388.4688   | 0.1148      | 211.3395  | 1.0994      |
| 10  | A    | 390.9786   | 0.2141      | 62.5663   | 2.3666      |
| 11  | A    | 428.5891   | 1.5565      | 1.9665    | 3.3933      |
| 12  | A    | 451.9126   | 0.2283      | 30.5177   | 1.1889      |
| 13  | A    | 466.5128   | 0.9417      | 10.2063   | 5.3674      |
| 14  | A    | 551.0452   | 1.5953      | 13.5841   | 24.4678     |
| 15  | A    | 588.6725   | 2.4990      | 10.4824   | 0.3451      |
| 16  | A    | 678.3790   | 1.5474      | 1.1228    | 0.7726      |
| 17  | A    | 691.1505   | 3.2405      | 1.3201    | 0.4327      |
| 18  | A    | 700.6778   | 3.3509      | 8.8653    | 5.9092      |
| 19  | A    | 739.2711   | 3.9043      | 6.0765    | 1.1929      |
| 20  | A    | 911.2687   | 4.9188      | 128.9401  | 5.6297      |
| 21  | A    | 956.6806   | 4.4402      | 114.8354  | 0.5208      |

|    |   |           |         |          |          |
|----|---|-----------|---------|----------|----------|
| 22 | A | 1105.0317 | 1.3796  | 33.8644  | 1.5577   |
| 23 | A | 1165.0984 | 7.7044  | 8.5387   | 6.7969   |
| 24 | A | 1256.5966 | 6.6009  | 78.5611  | 1.2704   |
| 25 | A | 1333.6876 | 7.4763  | 24.8170  | 4.2018   |
| 26 | A | 1438.6956 | 9.9325  | 93.7783  | 8.2038   |
| 27 | A | 1477.1939 | 11.9602 | 71.0255  | 5.3617   |
| 28 | A | 1508.6383 | 8.7805  | 593.5449 | 1.3871   |
| 29 | A | 1615.0763 | 13.1264 | 45.9905  | 6.2640   |
| 30 | A | 1630.7327 | 2.3230  | 79.8162  | 1.3020   |
| 31 | A | 1672.6438 | 9.0091  | 263.8566 | 23.8834  |
| 32 | A | 3595.1791 | 7.9635  | 87.0446  | 184.7764 |
| 33 | A | 3713.7951 | 8.9676  | 56.2550  | 47.3320  |

py-06\_B\_m062x

| NM# | Symm | Wavenumber | Force Const | IR Intens | Raman Activ |
|-----|------|------------|-------------|-----------|-------------|
| 1   | A    | 119.9171   | 0.0912      | 1.4576    | 0.2550      |
| 2   | A    | 125.7623   | 0.1339      | 0.5092    | 0.0775      |
| 3   | A    | 201.4090   | 0.4645      | 0.4448    | 1.3311      |
| 4   | A    | 204.2973   | 0.2134      | 0.8097    | 0.3010      |
| 5   | A    | 282.4703   | 0.5567      | 3.5551    | 0.2228      |
| 6   | A    | 306.1640   | 0.2544      | 5.2009    | 0.6479      |
| 7   | A    | 328.1751   | 0.5551      | 1.6153    | 1.1439      |
| 8   | A    | 329.7941   | 0.5879      | 3.8887    | 0.6731      |
| 9   | A    | 390.5379   | 0.1305      | 51.3009   | 1.4166      |
| 10  | A    | 403.7491   | 0.1660      | 210.5918  | 2.4085      |
| 11  | A    | 434.5210   | 1.5399      | 2.0805    | 3.4638      |
| 12  | A    | 455.7006   | 0.2964      | 52.2500   | 1.3447      |
| 13  | A    | 471.4998   | 0.8781      | 17.6039   | 5.6807      |
| 14  | A    | 560.6635   | 1.6064      | 13.2701   | 20.9224     |
| 15  | A    | 597.3953   | 2.5617      | 11.7250   | 0.4363      |
| 16  | A    | 687.2756   | 1.5589      | 0.7221    | 0.5395      |
| 17  | A    | 701.9439   | 3.3564      | 1.2013    | 0.3963      |
| 18  | A    | 712.9665   | 3.6918      | 8.7268    | 7.1370      |
| 19  | A    | 747.9941   | 4.0120      | 7.3253    | 1.4606      |
| 20  | A    | 939.4390   | 4.9489      | 116.1556  | 5.7123      |
| 21  | A    | 985.4659   | 4.1481      | 98.0612   | 0.3878      |
| 22  | A    | 1120.0126  | 1.3810      | 41.1804   | 1.6467      |
| 23  | A    | 1211.0670  | 8.6692      | 12.4804   | 5.9510      |
| 24  | A    | 1293.6146  | 9.7970      | 88.1133   | 1.0301      |
| 25  | A    | 1320.2121  | 5.8671      | 18.6786   | 4.4301      |
| 26  | A    | 1484.5032  | 7.8987      | 32.3917   | 7.5147      |
| 27  | A    | 1525.5383  | 12.6221     | 63.9707   | 6.7699      |
| 28  | A    | 1550.4852  | 8.7855      | 653.7547  | 3.4158      |
| 29  | A    | 1638.7197  | 2.2851      | 196.8183  | 2.7050      |
| 30  | A    | 1672.1966  | 15.7438     | 60.9395   | 5.6373      |
| 31  | A    | 1717.0805  | 16.5244     | 187.4743  | 28.2568     |
| 32  | A    | 3618.3205  | 8.0698      | 104.0004  | 174.4457    |



33 A 3740.4378 9.0974 69.1678 44.2156

py-06\_B\_mp2

| NM# | Symm | Wavenumber | Force Const | IR Intens | Raman Activ |
|-----|------|------------|-------------|-----------|-------------|
| 1   | A    | 112.5485   | 0.0735      | 1.6223    | 0.2692      |
| 2   | A    | 118.3312   | 0.1334      | 0.3021    | 0.0481      |
| 3   | A    | 196.6689   | 0.2044      | 0.8431    | 0.2885      |
| 4   | A    | 202.3509   | 0.4597      | 0.4936    | 1.3503      |
| 5   | A    | 282.9897   | 0.4738      | 4.0624    | 0.2763      |
| 6   | A    | 300.3958   | 0.5131      | 2.2297    | 0.1516      |
| 7   | A    | 305.2824   | 0.2343      | 3.5927    | 0.6027      |
| 8   | A    | 324.0867   | 0.6748      | 1.1779    | 0.9924      |
| 9   | A    | 360.0454   | 0.1064      | 12.8164   | 1.2562      |
| 10  | A    | 410.2596   | 0.8485      | 5.1723    | 2.0096      |
| 11  | A    | 426.0657   | 0.5062      | 10.1790   | 2.6502      |
| 12  | A    | 432.8479   | 1.9423      | 0.2570    | 3.3220      |
| 13  | A    | 463.6353   | 1.5818      | 0.2202    | 5.0291      |
| 14  | A    | 547.4167   | 1.7388      | 2.9578    | 17.9723     |
| 15  | A    | 577.2705   | 0.7735      | 56.5416   | 4.5991      |
| 16  | A    | 611.2186   | 0.5808      | 168.8999  | 7.1546      |
| 17  | A    | 665.8460   | 1.1025      | 119.9594  | 3.7975      |
| 18  | A    | 677.8294   | 1.4698      | 13.2738   | 0.6801      |
| 19  | A    | 712.9925   | 2.1735      | 28.9568   | 7.7529      |
| 20  | A    | 929.0727   | 4.8755      | 122.0113  | 5.7711      |
| 21  | A    | 967.4007   | 4.7311      | 90.7525   | 0.8112      |
| 22  | A    | 1133.9103  | 1.4630      | 16.3400   | 1.4912      |
| 23  | A    | 1188.0922  | 6.5840      | 9.0698    | 2.7649      |
| 24  | A    | 1276.1536  | 5.0719      | 58.6418   | 0.7461      |
| 25  | A    | 1442.8279  | 10.8150     | 19.6072   | 2.6808      |
| 26  | A    | 1451.9402  | 8.8263      | 67.9641   | 10.8230     |
| 27  | A    | 1496.7057  | 13.4287     | 47.9008   | 7.5348      |
| 28  | A    | 1524.3502  | 9.7891      | 629.2249  | 6.2276      |
| 29  | A    | 1630.5429  | 3.5109      | 42.6903   | 3.1474      |
| 30  | A    | 1644.3957  | 4.2256      | 51.1724   | 7.6169      |
| 31  | A    | 1687.2942  | 10.0224     | 164.8538  | 29.4244     |
| 32  | A    | 3595.8387  | 7.9787      | 64.7078   | 202.4166    |
| 33  | A    | 3717.3928  | 8.9595      | 47.8071   | 44.6606     |

py-06\_C\_b3lyp

| NM# | Symm | Wavenumber | Force Const | IR Intens | Raman Activ |
|-----|------|------------|-------------|-----------|-------------|
| 1   | A    | 97.0817    | 0.0575      | 0.9868    | 1.0249      |
| 2   | A    | 109.5805   | 0.0993      | 0.0013    | 0.1640      |
| 3   | A    | 161.8344   | 0.2015      | 0.6205    | 0.8858      |
| 4   | A    | 205.6376   | 0.5355      | 0.0071    | 1.3288      |

|    |   |           |         |          |          |
|----|---|-----------|---------|----------|----------|
| 5  | A | 281.5497  | 0.8377  | 0.4515   | 0.3260   |
| 6  | A | 285.0558  | 0.5861  | 3.4728   | 0.4997   |
| 7  | A | 313.6052  | 1.0592  | 1.7376   | 0.7785   |
| 8  | A | 331.9794  | 0.3910  | 2.9753   | 4.0625   |
| 9  | A | 341.4877  | 0.4640  | 0.9036   | 1.7257   |
| 10 | A | 416.9997  | 1.6214  | 4.0970   | 4.2149   |
| 11 | A | 446.5913  | 1.6392  | 1.7153   | 3.8219   |
| 12 | A | 504.8169  | 0.2198  | 58.2882  | 0.7822   |
| 13 | A | 543.5723  | 2.2661  | 7.6168   | 21.5820  |
| 14 | A | 583.5694  | 0.7766  | 61.1951  | 0.2827   |
| 15 | A | 646.5589  | 2.3818  | 0.3329   | 4.1414   |
| 16 | A | 670.5119  | 1.3266  | 7.5898   | 1.2750   |
| 17 | A | 699.9281  | 2.3988  | 1.4124   | 1.5906   |
| 18 | A | 720.9043  | 2.9208  | 30.2983  | 1.7799   |
| 19 | A | 774.8698  | 0.4076  | 50.7045  | 0.2889   |
| 20 | A | 908.5204  | 5.0782  | 108.8150 | 1.8002   |
| 21 | A | 946.6135  | 3.7568  | 102.7659 | 1.9211   |
| 22 | A | 1103.1911 | 1.3507  | 162.7849 | 11.4245  |
| 23 | A | 1201.3920 | 7.7773  | 26.2382  | 9.5606   |
| 24 | A | 1266.8304 | 3.2217  | 81.3158  | 11.8709  |
| 25 | A | 1297.2182 | 2.5339  | 54.4021  | 1.6997   |
| 26 | A | 1332.8123 | 4.0815  | 34.0583  | 41.6882  |
| 27 | A | 1427.3072 | 7.2343  | 116.6663 | 10.6739  |
| 28 | A | 1507.4608 | 6.4724  | 39.3236  | 76.2048  |
| 29 | A | 1612.9511 | 16.9645 | 1.0334   | 30.6160  |
| 30 | A | 1674.2014 | 9.2310  | 654.0702 | 173.0840 |
| 31 | A | 1733.7186 | 20.8217 | 222.0223 | 12.3610  |
| 32 | A | 3542.4772 | 7.9456  | 36.1500  | 85.1340  |
| 33 | A | 3596.3166 | 8.2103  | 119.1041 | 81.0752  |

-----

py-06\_C\_m062x

| NM# | Symm | Wavenumber | Force Const | IR Intens | Raman Activ |
|-----|------|------------|-------------|-----------|-------------|
| 1   | A    | 97.1079    | 0.0563      | 0.7821    | 1.0590      |
| 2   | A    | 112.4226   | 0.1049      | 0.0182    | 0.1043      |
| 3   | A    | 162.7384   | 0.2073      | 0.3775    | 0.8687      |
| 4   | A    | 205.0707   | 0.5350      | 0.0093    | 1.2198      |
| 5   | A    | 281.0064   | 0.8376      | 0.7003    | 0.2339      |
| 6   | A    | 291.4022   | 0.6077      | 3.9553    | 0.4740      |
| 7   | A    | 318.0841   | 1.0727      | 2.2823    | 0.6048      |
| 8   | A    | 338.3196   | 0.4096      | 2.9761    | 4.2714      |
| 9   | A    | 355.3459   | 0.4707      | 1.7551    | 1.6347      |
| 10  | A    | 420.1619   | 1.6149      | 3.9120    | 4.0886      |
| 11  | A    | 449.2772   | 1.6541      | 1.6185    | 3.3003      |
| 12  | A    | 503.1270   | 0.2119      | 65.5444   | 0.8028      |
| 13  | A    | 553.9018   | 2.3671      | 7.2239    | 17.7764     |
| 14  | A    | 588.3171   | 0.8864      | 59.0894   | 0.1781      |
| 15  | A    | 649.7378   | 2.4702      | 0.0221    | 3.4349      |

|    |   |           |         |          |          |
|----|---|-----------|---------|----------|----------|
| 16 | A | 676.7939  | 1.3567  | 6.4475   | 1.5270   |
| 17 | A | 698.4490  | 2.6540  | 1.6292   | 2.5117   |
| 18 | A | 729.5391  | 2.9651  | 30.4002  | 1.8954   |
| 19 | A | 799.4103  | 0.4282  | 54.8932  | 0.3693   |
| 20 | A | 935.6445  | 5.1430  | 97.8803  | 1.3879   |
| 21 | A | 971.3190  | 3.6155  | 95.0010  | 2.2021   |
| 22 | A | 1124.3033 | 1.2621  | 157.5183 | 11.2096  |
| 23 | A | 1245.1809 | 8.3246  | 52.7531  | 9.3931   |
| 24 | A | 1296.6319 | 2.2716  | 63.9303  | 7.3731   |
| 25 | A | 1320.4595 | 3.2329  | 36.2938  | 3.3191   |
| 26 | A | 1361.9614 | 5.8189  | 35.2101  | 63.5236  |
| 27 | A | 1466.1268 | 8.2882  | 127.1454 | 8.3217   |
| 28 | A | 1544.7227 | 8.1061  | 52.2308  | 79.2515  |
| 29 | A | 1676.6045 | 18.4563 | 4.4375   | 46.5499  |
| 30 | A | 1726.5525 | 11.7874 | 730.9545 | 183.5352 |
| 31 | A | 1794.4254 | 22.4006 | 223.4457 | 13.9035  |
| 32 | A | 3577.3828 | 8.1050  | 53.0690  | 76.9240  |
| 33 | A | 3618.3885 | 8.3142  | 142.1974 | 79.5123  |

py-06\_C\_mp2

| NM# | Symm | Wavenumber | Force Const | IR Intens | Raman Activ |
|-----|------|------------|-------------|-----------|-------------|
| 1   | A    | 95.7363    | 0.0561      | 1.3040    | 1.1207      |
| 2   | A    | 110.1377   | 0.1038      | 0.0352    | 0.2739      |
| 3   | A    | 162.6231   | 0.2011      | 0.9048    | 1.1187      |
| 4   | A    | 206.9248   | 0.5406      | 0.0086    | 1.2116      |
| 5   | A    | 281.4620   | 0.8073      | 0.4174    | 0.2667      |
| 6   | A    | 291.1008   | 0.5496      | 2.2426    | 0.6878      |
| 7   | A    | 316.0623   | 1.0947      | 2.1327    | 0.6086      |
| 8   | A    | 329.6297   | 0.3966      | 3.1118    | 4.9683      |
| 9   | A    | 347.7030   | 0.5684      | 1.2728    | 2.4124      |
| 10  | A    | 420.8937   | 1.5930      | 3.1923    | 3.4533      |
| 11  | A    | 446.9941   | 1.6254      | 1.5848    | 3.5901      |
| 12  | A    | 506.3927   | 0.4375      | 12.8571   | 0.7924      |
| 13  | A    | 545.9637   | 2.1139      | 6.2068    | 15.1398     |
| 14  | A    | 579.8173   | 0.3451      | 116.4116  | 1.3395      |
| 15  | A    | 619.8526   | 2.1231      | 2.9616    | 6.2235      |
| 16  | A    | 667.8075   | 1.2944      | 6.4625    | 2.7257      |
| 17  | A    | 704.5813   | 2.6783      | 7.2830    | 13.5696     |
| 18  | A    | 723.9775   | 2.6326      | 33.0837   | 2.2281      |
| 19  | A    | 750.5123   | 0.3753      | 32.7787   | 0.8076      |
| 20  | A    | 932.2548   | 5.2121      | 113.2579  | 3.0904      |
| 21  | A    | 953.1267   | 3.8112      | 70.6584   | 1.2178      |
| 22  | A    | 1127.2915  | 1.2821      | 139.2980  | 8.8644      |
| 23  | A    | 1216.5240  | 8.6643      | 28.3642   | 7.2856      |
| 24  | A    | 1284.4325  | 2.7318      | 61.8754   | 8.9745      |
| 25  | A    | 1311.4492  | 2.2975      | 53.3376   | 0.7181      |
| 26  | A    | 1380.8514  | 7.5280      | 28.2960   | 86.9372     |

|    |   |           |         |          |          |
|----|---|-----------|---------|----------|----------|
| 27 | A | 1464.3604 | 7.2212  | 83.0133  | 3.9367   |
| 28 | A | 1522.9849 | 8.7114  | 36.9804  | 146.2677 |
| 29 | A | 1606.6436 | 18.1500 | 23.6732  | 21.0587  |
| 30 | A | 1679.6060 | 9.1300  | 553.0584 | 236.9254 |
| 31 | A | 1750.2397 | 21.1387 | 160.5489 | 10.9628  |
| 32 | A | 3559.2957 | 8.0211  | 38.1021  | 71.6388  |
| 33 | A | 3605.8321 | 8.2536  | 124.6214 | 87.6761  |

py-08\_A\_b31yp

| NM# | Symm | Wavenumber | Force Const | IR Intens | Raman Activ |
|-----|------|------------|-------------|-----------|-------------|
| 1   | A    | 114.9615   | 0.0765      | 1.6167    | 0.2738      |
| 2   | A    | 197.1985   | 0.2161      | 0.4719    | 0.5957      |
| 3   | A    | 280.5573   | 0.3439      | 5.3335    | 0.9569      |
| 4   | A    | 296.1449   | 0.3596      | 6.4017    | 1.2998      |
| 5   | A    | 298.8476   | 0.3181      | 3.6345    | 0.1338      |
| 6   | A    | 348.2671   | 0.5396      | 1.3405    | 0.1032      |
| 7   | A    | 397.2311   | 0.1298      | 23.7162   | 1.1037      |
| 8   | A    | 408.8233   | 0.1502      | 232.2208  | 1.1151      |
| 9   | A    | 450.1870   | 0.4655      | 14.8602   | 2.4474      |
| 10  | A    | 456.9591   | 0.7722      | 11.9000   | 3.9808      |
| 11  | A    | 479.5042   | 0.4058      | 40.6649   | 0.5623      |
| 12  | A    | 515.6015   | 1.5909      | 7.8460    | 12.5380     |
| 13  | A    | 634.9771   | 1.0601      | 2.5870    | 1.8531      |
| 14  | A    | 690.8682   | 3.0805      | 14.5785   | 1.0806      |
| 15  | A    | 695.2018   | 3.3311      | 2.6696    | 1.0268      |
| 16  | A    | 734.3525   | 2.8887      | 13.4079   | 1.4152      |
| 17  | A    | 760.3132   | 2.7029      | 13.4314   | 28.0692     |
| 18  | A    | 886.6971   | 1.6204      | 87.5686   | 0.4624      |
| 19  | A    | 890.3676   | 0.6480      | 27.9298   | 0.2156      |
| 20  | A    | 1099.8237  | 1.3635      | 53.4524   | 1.1966      |
| 21  | A    | 1133.5906  | 3.1035      | 49.8511   | 5.2076      |
| 22  | A    | 1201.8168  | 1.8517      | 68.9170   | 0.8857      |
| 23  | A    | 1250.7857  | 4.0756      | 140.8955  | 0.5102      |
| 24  | A    | 1340.1518  | 6.2081      | 45.4072   | 1.3733      |
| 25  | A    | 1419.4974  | 9.8765      | 44.7175   | 11.7237     |
| 26  | A    | 1466.1377  | 8.9519      | 44.5509   | 2.9459      |
| 27  | A    | 1520.0869  | 7.4338      | 649.6669  | 2.3121      |
| 28  | A    | 1631.0665  | 2.7116      | 106.8378  | 1.0903      |
| 29  | A    | 1634.2339  | 5.6462      | 30.2458   | 6.0661      |
| 30  | A    | 1685.0887  | 10.7042     | 104.5291  | 26.1194     |
| 31  | A    | 3216.6344  | 6.6665      | 1.5452    | 102.2118    |
| 32  | A    | 3593.1856  | 7.9553      | 73.9049   | 171.9036    |
| 33  | A    | 3710.6198  | 8.9492      | 53.3559   | 44.6502     |

py-08\_A\_b3p86

| NM# | Symm | Wavenumber | Force Const | IR Intens | Raman Activ |
|-----|------|------------|-------------|-----------|-------------|
| 1   | A    | 115.0330   | 0.0767      | 1.5898    | 0.2684      |
| 2   | A    | 199.1994   | 0.2195      | 0.4895    | 0.5851      |
| 3   | A    | 277.7440   | 0.2996      | 5.9146    | 0.9706      |
| 4   | A    | 297.1675   | 0.3447      | 2.6146    | 0.0849      |
| 5   | A    | 298.3406   | 0.3542      | 6.9466    | 1.2702      |
| 6   | A    | 350.5692   | 0.5437      | 1.3461    | 0.0898      |
| 7   | A    | 397.3142   | 0.1191      | 69.1205   | 0.8769      |
| 8   | A    | 406.5027   | 0.1536      | 198.6071  | 1.2339      |
| 9   | A    | 452.5409   | 0.6804      | 4.8616    | 3.1070      |
| 10  | A    | 456.9476   | 0.6100      | 13.2227   | 3.2822      |
| 11  | A    | 479.8298   | 0.4165      | 35.6185   | 0.5065      |
| 12  | A    | 514.8350   | 1.5806      | 7.2490    | 11.5639     |
| 13  | A    | 636.8668   | 1.0564      | 2.6357    | 1.8681      |
| 14  | A    | 694.5396   | 3.1145      | 11.2079   | 0.8641      |
| 15  | A    | 697.6132   | 3.4085      | 3.8519    | 1.2770      |
| 16  | A    | 734.0804   | 3.0135      | 12.2759   | 1.2839      |
| 17  | A    | 762.9676   | 2.7117      | 11.7759   | 28.3835     |
| 18  | A    | 886.3785   | 0.6325      | 29.2963   | 0.2164      |
| 19  | A    | 894.9398   | 1.5476      | 78.9214   | 0.5025      |
| 20  | A    | 1102.8175  | 1.3472      | 47.0383   | 1.1843      |
| 21  | A    | 1149.3846  | 2.4177      | 59.7647   | 4.4573      |
| 22  | A    | 1208.8349  | 2.1240      | 46.2998   | 1.3700      |
| 23  | A    | 1261.4428  | 4.3824      | 149.2853  | 0.4994      |
| 24  | A    | 1368.2229  | 7.6189      | 60.6079   | 1.0407      |
| 25  | A    | 1439.6870  | 9.9145      | 46.3716   | 11.2540     |
| 26  | A    | 1482.8152  | 8.6472      | 39.0945   | 3.0093      |
| 27  | A    | 1540.2297  | 6.8061      | 623.2293  | 1.7680      |
| 28  | A    | 1631.1632  | 2.2107      | 193.1217  | 1.3606      |
| 29  | A    | 1654.8961  | 13.8402     | 8.6441    | 6.0124      |
| 30  | A    | 1705.7706  | 13.5348     | 90.0521   | 24.8176     |
| 31  | A    | 3229.5020  | 6.7220      | 2.0854    | 100.1071    |
| 32  | A    | 3613.2374  | 8.0458      | 77.8904   | 167.9218    |
| 33  | A    | 3734.3846  | 9.0640      | 56.9486   | 43.0742     |

py-08\_A\_b3pw91

| NM# | Symm | Wavenumber | Force Const | IR Intens | Raman Activ |
|-----|------|------------|-------------|-----------|-------------|
| 1   | A    | 114.3650   | 0.0757      | 1.6123    | 0.2682      |
| 2   | A    | 199.1797   | 0.2200      | 0.4708    | 0.5870      |
| 3   | A    | 278.1709   | 0.3023      | 5.8580    | 0.9696      |
| 4   | A    | 297.6685   | 0.3782      | 1.5400    | 0.3115      |
| 5   | A    | 297.8512   | 0.3227      | 8.0897    | 1.0564      |
| 6   | A    | 350.1961   | 0.5443      | 1.3562    | 0.0919      |
| 7   | A    | 396.2408   | 0.1191      | 52.1064   | 0.8953      |
| 8   | A    | 409.3399   | 0.1553      | 211.0255  | 1.1926      |
| 9   | A    | 452.1635   | 0.8136      | 3.2363    | 3.4325      |

|    |   |           |         |          |          |
|----|---|-----------|---------|----------|----------|
| 10 | A | 456.7447  | 0.5412  | 17.2303  | 3.0127   |
| 11 | A | 480.2854  | 0.4127  | 39.3981  | 0.5293   |
| 12 | A | 513.9200  | 1.5728  | 7.4430   | 11.7111  |
| 13 | A | 636.8403  | 1.0604  | 2.5669   | 1.8540   |
| 14 | A | 693.0919  | 3.1367  | 13.1174  | 1.2131   |
| 15 | A | 697.5876  | 3.3636  | 2.1784   | 0.9653   |
| 16 | A | 734.5570  | 2.9829  | 12.2833  | 1.3707   |
| 17 | A | 760.6005  | 2.6939  | 11.9807  | 28.2283  |
| 18 | A | 886.9541  | 0.6353  | 29.0168  | 0.2188   |
| 19 | A | 893.0174  | 1.5649  | 80.5452  | 0.4889   |
| 20 | A | 1102.2107 | 1.3486  | 48.3062  | 1.1807   |
| 21 | A | 1146.1444 | 2.5581  | 57.1263  | 4.6007   |
| 22 | A | 1206.3219 | 2.0371  | 51.9274  | 1.2190   |
| 23 | A | 1257.8910 | 4.2425  | 147.3634 | 0.5184   |
| 24 | A | 1363.6285 | 7.4096  | 60.3847  | 1.0859   |
| 25 | A | 1434.0984 | 9.9439  | 44.3957  | 11.4124  |
| 26 | A | 1478.9105 | 8.7289  | 39.1788  | 2.8918   |
| 27 | A | 1536.2616 | 7.0329  | 632.0465 | 1.8843   |
| 28 | A | 1631.4012 | 2.1779  | 175.8019 | 1.2614   |
| 29 | A | 1650.6571 | 13.6578 | 8.6960   | 5.8248   |
| 30 | A | 1701.3207 | 13.0355 | 90.9611  | 25.6569  |
| 31 | A | 3225.3175 | 6.7043  | 1.7148   | 100.6618 |
| 32 | A | 3611.2388 | 8.0372  | 75.2709  | 168.4942 |
| 33 | A | 3731.8693 | 9.0509  | 54.9734  | 43.4208  |

py-08\_A\_blyp

| NM# | Symm | Wavenumber | Force Const | IR Intens | Raman Activ |
|-----|------|------------|-------------|-----------|-------------|
| 1   | A    | 108.1289   | 0.0681      | 1.6435    | 0.3280      |
| 2   | A    | 187.8660   | 0.1995      | 0.3709    | 0.6608      |
| 3   | A    | 270.0650   | 0.3223      | 5.0374    | 1.2033      |
| 4   | A    | 282.3049   | 0.3379      | 5.2398    | 1.3049      |
| 5   | A    | 288.0296   | 0.2986      | 3.3354    | 0.1432      |
| 6   | A    | 333.7542   | 0.4936      | 1.2802    | 0.1299      |
| 7   | A    | 384.1908   | 0.1455      | 5.9843    | 1.3599      |
| 8   | A    | 410.6800   | 0.1554      | 178.0762  | 0.7694      |
| 9   | A    | 433.3480   | 0.4278      | 23.7043   | 2.4567      |
| 10  | A    | 440.1809   | 0.5938      | 20.3987   | 3.6840      |
| 11  | A    | 464.4741   | 0.3004      | 86.0297   | 0.9566      |
| 12  | A    | 494.3115   | 1.4126      | 10.4922   | 15.7411     |
| 13  | A    | 610.5233   | 0.9914      | 1.6295    | 2.1019      |
| 14  | A    | 655.4836   | 2.7479      | 5.1064    | 0.4891      |
| 15  | A    | 659.5391   | 2.9305      | 15.1417   | 1.6469      |
| 16  | A    | 693.5481   | 2.6795      | 10.0069   | 1.1962      |
| 17  | A    | 728.3146   | 2.4808      | 15.7652   | 29.1259     |
| 18  | A    | 845.5442   | 0.6228      | 35.8158   | 0.2582      |
| 19  | A    | 846.8458   | 1.3532      | 86.7942   | 0.5366      |
| 20  | A    | 1058.9669  | 1.3095      | 58.4477   | 1.2082      |

|    |   |           |         |          |          |
|----|---|-----------|---------|----------|----------|
| 21 | A | 1068.5633 | 3.4948  | 36.2148  | 7.1489   |
| 22 | A | 1150.8464 | 1.9255  | 135.0323 | 0.9630   |
| 23 | A | 1197.0132 | 2.3660  | 83.7984  | 1.0680   |
| 24 | A | 1313.2027 | 6.2036  | 30.8013  | 0.8396   |
| 25 | A | 1346.1394 | 8.4147  | 66.3855  | 9.5980   |
| 26 | A | 1395.9958 | 8.3832  | 36.2568  | 4.0978   |
| 27 | A | 1448.4742 | 7.0987  | 600.4867 | 1.2406   |
| 28 | A | 1550.9756 | 10.8141 | 6.0340   | 7.4334   |
| 29 | A | 1579.6378 | 2.3423  | 46.2966  | 0.6383   |
| 30 | A | 1612.0986 | 5.1204  | 136.5602 | 20.2679  |
| 31 | A | 3138.5254 | 6.3404  | 1.0698   | 110.7679 |
| 32 | A | 3486.4008 | 7.4876  | 59.1834  | 200.6927 |
| 33 | A | 3599.9407 | 8.4181  | 43.6189  | 50.9791  |

py-08\_A\_bp86

| NM# | Symm | Wavenumber | Force Const | IR Intens | Raman Activ |
|-----|------|------------|-------------|-----------|-------------|
| 1   | A    | 107.8743   | 0.0674      | 1.6412    | 0.3192      |
| 2   | A    | 189.2273   | 0.2015      | 0.4184    | 0.6456      |
| 3   | A    | 267.5400   | 0.2781      | 5.5812    | 1.2007      |
| 4   | A    | 283.8936   | 0.3385      | 5.3914    | 1.2773      |
| 5   | A    | 286.4962   | 0.3100      | 2.9426    | 0.0998      |
| 6   | A    | 336.1769   | 0.4910      | 1.3471    | 0.1075      |
| 7   | A    | 383.4603   | 0.1344      | 6.7793    | 1.2016      |
| 8   | A    | 414.9215   | 0.1720      | 158.0102  | 0.8621      |
| 9   | A    | 434.8204   | 0.6011      | 15.2608   | 2.9541      |
| 10  | A    | 439.8043   | 0.5271      | 22.3048   | 2.8935      |
| 11  | A    | 466.3251   | 0.2766      | 113.3317  | 1.0856      |
| 12  | A    | 494.8407   | 1.4135      | 9.8079    | 14.2584     |
| 13  | A    | 612.2167   | 0.9884      | 1.6475    | 2.1509      |
| 14  | A    | 655.2460   | 2.8165      | 3.0284    | 0.4901      |
| 15  | A    | 664.8828   | 2.9336      | 14.0339   | 1.6993      |
| 16  | A    | 690.1292   | 2.8114      | 9.4365    | 1.1433      |
| 17  | A    | 732.5129   | 2.4907      | 13.6834   | 29.7857     |
| 18  | A    | 836.3218   | 0.5551      | 28.7854   | 0.2373      |
| 19  | A    | 856.8470   | 1.5413      | 84.1855   | 0.5899      |
| 20  | A    | 1063.6652  | 1.2874      | 48.4653   | 1.1852      |
| 21  | A    | 1088.4480  | 2.7362      | 51.3221   | 6.4491      |
| 22  | A    | 1157.5326  | 1.8867      | 92.0455   | 1.3430      |
| 23  | A    | 1205.7984  | 2.9045      | 108.0002  | 0.9498      |
| 24  | A    | 1342.7671  | 7.3922      | 41.8558   | 0.3832      |
| 25  | A    | 1369.8586  | 8.9001      | 77.4209   | 9.5830      |
| 26  | A    | 1414.9070  | 8.5930      | 34.4118   | 4.1161      |
| 27  | A    | 1469.4451  | 6.6909      | 585.1650  | 1.0477      |
| 28  | A    | 1572.0983  | 6.3330      | 33.3051   | 4.9905      |
| 29  | A    | 1576.2576  | 2.3836      | 86.8162   | 2.8872      |
| 30  | A    | 1629.6029  | 9.8532      | 101.3656  | 18.9339     |
| 31  | A    | 3141.2311  | 6.3537      | 1.4065    | 110.2957    |

|    |   |           |        |         |          |
|----|---|-----------|--------|---------|----------|
| 32 | A | 3495.0236 | 7.5264 | 59.2680 | 198.7682 |
| 33 | A | 3612.1282 | 8.4732 | 45.7924 | 49.8590  |

py-08\_A\_bpw91

| NM# | Symm | Wavenumber | Force Const | IR Intens | Raman Activ |
|-----|------|------------|-------------|-----------|-------------|
| 1   | A    | 107.5819   | 0.0671      | 1.6514    | 0.3154      |
| 2   | A    | 190.1545   | 0.2033      | 0.4009    | 0.6364      |
| 3   | A    | 268.9983   | 0.2835      | 5.5429    | 1.1953      |
| 4   | A    | 284.6922   | 0.3381      | 5.4773    | 1.2746      |
| 5   | A    | 288.2240   | 0.3148      | 2.9239    | 0.0945      |
| 6   | A    | 337.4401   | 0.5012      | 1.3317    | 0.1063      |
| 7   | A    | 385.6945   | 0.1321      | 8.0897    | 1.1589      |
| 8   | A    | 414.1005   | 0.1671      | 178.7134  | 0.8077      |
| 9   | A    | 436.2370   | 0.6882      | 8.0845    | 3.3365      |
| 10  | A    | 441.2288   | 0.4885      | 24.4339   | 2.6584      |
| 11  | A    | 467.3434   | 0.2942      | 96.2913   | 0.9523      |
| 12  | A    | 496.0470   | 1.4227      | 9.6505    | 14.1268     |
| 13  | A    | 614.9106   | 0.9997      | 1.6397    | 2.1049      |
| 14  | A    | 660.0706   | 2.8399      | 3.4967    | 0.4430      |
| 15  | A    | 666.2208   | 2.9897      | 13.6763   | 1.7523      |
| 16  | A    | 695.6302   | 2.7915      | 9.4642    | 1.1388      |
| 17  | A    | 734.0992   | 2.5072      | 13.6957   | 29.4661     |
| 18  | A    | 842.2348   | 0.5650      | 28.1847   | 0.2336      |
| 19  | A    | 859.5978   | 1.5681      | 86.0381   | 0.5652      |
| 20  | A    | 1067.2625  | 1.2942      | 50.0679   | 1.1772      |
| 21  | A    | 1091.4295  | 2.8702      | 48.2811   | 6.3732      |
| 22  | A    | 1161.1884  | 1.8935      | 100.0993  | 1.1974      |
| 23  | A    | 1209.0794  | 2.8158      | 104.7514  | 0.9763      |
| 24  | A    | 1347.5649  | 7.4302      | 45.3066   | 0.4069      |
| 25  | A    | 1373.0701  | 8.9650      | 75.2008   | 9.4137      |
| 26  | A    | 1419.9018  | 8.6802      | 33.7133   | 3.9386      |
| 27  | A    | 1474.9971  | 6.8003      | 584.9351  | 0.9870      |
| 28  | A    | 1578.2032  | 9.4122      | 16.7317   | 5.9645      |
| 29  | A    | 1583.5820  | 2.1501      | 97.7993   | 1.6567      |
| 30  | A    | 1635.4449  | 9.6263      | 103.7110  | 19.6382     |
| 31  | A    | 3157.2270  | 6.4185      | 1.2555    | 108.2086    |
| 32  | A    | 3516.5476  | 7.6195      | 59.8358   | 193.3606    |
| 33  | A    | 3634.0365  | 8.5767      | 45.5114   | 48.8774     |

py-08\_A\_camb3lyp

| NM# | Symm | Wavenumber | Force Const | IR Intens | Raman Activ |
|-----|------|------------|-------------|-----------|-------------|
| 1   | A    | 118.5744   | 0.0828      | 1.3980    | 0.2483      |
| 2   | A    | 201.3078   | 0.2187      | 0.5556    | 0.5449      |
| 3   | A    | 282.4849   | 0.3471      | 5.8578    | 0.8843      |



|    |   |           |         |          |          |
|----|---|-----------|---------|----------|----------|
| 4  | A | 300.6954  | 0.3144  | 6.2000   | 0.1556   |
| 5  | A | 302.4917  | 0.3712  | 6.7964   | 1.2660   |
| 6  | A | 352.8794  | 0.5008  | 7.1826   | 0.1512   |
| 7  | A | 364.4153  | 0.1009  | 278.6517 | 1.1986   |
| 8  | A | 407.5231  | 0.1496  | 9.9607   | 1.3606   |
| 9  | A | 457.7795  | 0.5078  | 3.7396   | 2.6522   |
| 10 | A | 462.4318  | 0.8286  | 4.8185   | 3.7843   |
| 11 | A | 485.6383  | 0.4696  | 12.6967  | 0.2557   |
| 12 | A | 521.3628  | 1.6357  | 6.5868   | 11.0270  |
| 13 | A | 641.4497  | 1.0597  | 3.6731   | 1.7000   |
| 14 | A | 701.5423  | 3.3074  | 14.7666  | 1.3936   |
| 15 | A | 715.7194  | 3.4672  | 1.4349   | 0.6003   |
| 16 | A | 757.9563  | 2.8956  | 15.4936  | 1.6719   |
| 17 | A | 773.3752  | 2.8210  | 11.8160  | 27.5488  |
| 18 | A | 901.2835  | 1.5724  | 83.1577  | 0.4602   |
| 19 | A | 915.1397  | 0.6907  | 27.3769  | 0.2753   |
| 20 | A | 1107.3479 | 1.3640  | 56.2738  | 1.2599   |
| 21 | A | 1158.0259 | 2.5996  | 55.7400  | 4.0636   |
| 22 | A | 1215.1613 | 2.0143  | 25.5402  | 0.8766   |
| 23 | A | 1269.7970 | 6.6136  | 183.8148 | 0.2389   |
| 24 | A | 1328.0816 | 5.1478  | 52.3941  | 1.9981   |
| 25 | A | 1451.9089 | 9.7983  | 36.8765  | 12.7640  |
| 26 | A | 1496.9644 | 8.8808  | 40.2315  | 2.3807   |
| 27 | A | 1552.3524 | 6.7918  | 640.0292 | 3.5892   |
| 28 | A | 1642.2357 | 2.2308  | 227.6871 | 2.4077   |
| 29 | A | 1677.5949 | 14.4124 | 12.2663  | 6.3380   |
| 30 | A | 1725.7045 | 14.8114 | 91.4220  | 30.6707  |
| 31 | A | 3235.5069 | 6.7514  | 2.7040   | 97.2253  |
| 32 | A | 3625.2752 | 8.0972  | 92.4190  | 154.6350 |
| 33 | A | 3743.9820 | 9.1192  | 64.0974  | 39.8755  |

-----

py-08\_A\_m062x

| NM# | Symm | Wavenumber | Force Const | IR Intens | Raman Activ |
|-----|------|------------|-------------|-----------|-------------|
| 1   | A    | 119.3146   | 0.0812      | 1.6830    | 0.2517      |
| 2   | A    | 201.7105   | 0.2250      | 0.6009    | 0.5749      |
| 3   | A    | 282.6641   | 0.3884      | 4.7526    | 0.7102      |
| 4   | A    | 301.5253   | 0.2983      | 4.7237    | 0.2047      |
| 5   | A    | 302.7930   | 0.3611      | 7.6611    | 1.2403      |
| 6   | A    | 354.5040   | 0.5229      | 1.5838    | 0.0973      |
| 7   | A    | 390.7435   | 0.1117      | 27.6594   | 0.9485      |
| 8   | A    | 424.5487   | 0.1938      | 196.1349  | 1.6495      |
| 9   | A    | 457.6638   | 0.9785      | 5.7837    | 3.2916      |
| 10  | A    | 463.0351   | 0.5238      | 29.7498   | 3.0023      |
| 11  | A    | 485.7624   | 0.3667      | 82.6722   | 1.1988      |
| 12  | A    | 518.9641   | 1.6021      | 7.4270    | 10.3337     |
| 13  | A    | 640.7312   | 1.0729      | 3.4653    | 1.7712      |
| 14  | A    | 703.0218   | 3.0611      | 10.1068   | 0.5475      |

|    |   |           |         |          |          |
|----|---|-----------|---------|----------|----------|
| 15 | A | 707.5308  | 3.4669  | 3.9361   | 1.1800   |
| 16 | A | 745.3396  | 3.1393  | 14.6785  | 1.3172   |
| 17 | A | 772.1194  | 2.7917  | 9.6833   | 28.3903  |
| 18 | A | 904.3142  | 0.6600  | 31.2611  | 0.2416   |
| 19 | A | 908.4297  | 1.5022  | 70.9496  | 0.5394   |
| 20 | A | 1113.6866 | 1.3497  | 46.5297  | 1.2417   |
| 21 | A | 1172.7522 | 1.8914  | 65.4698  | 2.7950   |
| 22 | A | 1219.1188 | 2.7717  | 6.3645   | 1.3370   |
| 23 | A | 1278.6880 | 7.3922  | 185.6394 | 0.1984   |
| 24 | A | 1325.5498 | 4.9583  | 47.5211  | 1.7929   |
| 25 | A | 1467.1909 | 9.7584  | 19.4584  | 13.5633  |
| 26 | A | 1506.6119 | 8.5638  | 33.7898  | 2.1791   |
| 27 | A | 1558.8156 | 7.3367  | 660.8276 | 4.2198   |
| 28 | A | 1639.0133 | 2.2467  | 237.1386 | 3.4356   |
| 29 | A | 1685.8328 | 14.8372 | 11.7936  | 4.7609   |
| 30 | A | 1728.5075 | 15.1894 | 68.5114  | 30.3905  |
| 31 | A | 3243.7287 | 6.7854  | 3.9728   | 94.8308  |
| 32 | A | 3616.4870 | 8.0627  | 88.7035  | 162.4250 |
| 33 | A | 3737.2240 | 9.0778  | 65.5445  | 41.6924  |

py-08\_A\_mn15

| NM# | Symm | Wavenumber | Force Const | IR Intens | Raman Activ |
|-----|------|------------|-------------|-----------|-------------|
| 1   | A    | 116.5163   | 0.0832      | 1.0310    | 0.2739      |
| 2   | A    | 198.9632   | 0.1993      | 0.8544    | 0.5760      |
| 3   | A    | 274.8967   | 0.2912      | 12.2732   | 0.9753      |
| 4   | A    | 289.6144   | 0.1258      | 104.7581  | 0.8203      |
| 5   | A    | 299.1433   | 0.3958      | 3.0100    | 1.2754      |
| 6   | A    | 303.5097   | 0.0958      | 167.3430  | 0.9234      |
| 7   | A    | 348.8749   | 0.5579      | 3.7920    | 0.0842      |
| 8   | A    | 404.3996   | 0.1462      | 5.6896    | 1.3553      |
| 9   | A    | 447.3138   | 1.1702      | 1.5415    | 4.2206      |
| 10  | A    | 454.1929   | 0.4136      | 2.2134    | 2.0392      |
| 11  | A    | 476.4841   | 0.4441      | 6.9290    | 0.1763      |
| 12  | A    | 506.9549   | 1.5224      | 5.9287    | 10.0766     |
| 13  | A    | 628.3464   | 1.0031      | 3.8578    | 1.8874      |
| 14  | A    | 691.8251   | 3.3262      | 11.9871   | 1.4821      |
| 15  | A    | 703.7730   | 3.3549      | 1.3410    | 0.5217      |
| 16  | A    | 742.7969   | 2.9016      | 13.6143   | 1.1536      |
| 17  | A    | 762.9341   | 2.7467      | 9.3624    | 29.9976     |
| 18  | A    | 895.1251   | 1.3479      | 67.8774   | 0.6209      |
| 19  | A    | 902.7358   | 0.6653      | 27.9285   | 0.3808      |
| 20  | A    | 1082.1106  | 1.2898      | 47.2820   | 1.1413      |
| 21  | A    | 1159.5730  | 1.8025      | 68.7615   | 3.1888      |
| 22  | A    | 1211.7308  | 2.8731      | 12.6628   | 1.8467      |
| 23  | A    | 1264.5737  | 5.8952      | 178.0975  | 0.2190      |
| 24  | A    | 1330.9781  | 7.0951      | 73.4455   | 1.6543      |
| 25  | A    | 1460.6797  | 8.5958      | 31.1148   | 12.4313     |

|    |   |           |         |          |          |
|----|---|-----------|---------|----------|----------|
| 26 | A | 1493.7581 | 7.3729  | 30.6539  | 3.1076   |
| 27 | A | 1552.4830 | 5.2174  | 546.0395 | 1.8651   |
| 28 | A | 1615.2360 | 2.6478  | 395.6847 | 3.6974   |
| 29 | A | 1673.2750 | 15.4421 | 14.8932  | 5.6095   |
| 30 | A | 1720.6962 | 16.1211 | 78.8812  | 29.8375  |
| 31 | A | 3252.3136 | 6.8176  | 0.9167   | 107.2834 |
| 32 | A | 3637.7394 | 8.1524  | 95.6981  | 165.0560 |
| 33 | A | 3767.1263 | 9.2359  | 64.4318  | 43.1997  |

py-08\_A\_mp2

| NM# | Symm | Wavenumber | Force Const | IR Intens | Raman Activ |
|-----|------|------------|-------------|-----------|-------------|
| 1   | A    | 112.1722   | 0.0710      | 1.6632    | 0.2200      |
| 2   | A    | 198.4409   | 0.2192      | 0.7092    | 0.4843      |
| 3   | A    | 281.2790   | 0.3100      | 5.3283    | 0.7786      |
| 4   | A    | 290.5024   | 0.3235      | 7.0950    | 1.1617      |
| 5   | A    | 301.0686   | 0.3242      | 2.2231    | 0.0841      |
| 6   | A    | 346.3688   | 0.2433      | 4.5081    | 0.1014      |
| 7   | A    | 360.6021   | 0.1146      | 13.4757   | 0.7599      |
| 8   | A    | 440.5713   | 0.7493      | 8.7789    | 2.9678      |
| 9   | A    | 445.3745   | 0.6183      | 0.9273    | 0.3364      |
| 10  | A    | 452.6729   | 1.2931      | 0.8494    | 4.1838      |
| 11  | A    | 510.9462   | 1.6540      | 4.3681    | 10.8460     |
| 12  | A    | 575.0547   | 1.0761      | 32.0073   | 2.1814      |
| 13  | A    | 614.7592   | 0.5794      | 162.6738  | 4.1129      |
| 14  | A    | 633.7609   | 1.1107      | 2.4022    | 2.3991      |
| 15  | A    | 667.1911   | 0.9991      | 127.4244  | 2.5477      |
| 16  | A    | 710.1377   | 1.6977      | 43.3833   | 3.4351      |
| 17  | A    | 753.6652   | 2.2593      | 18.2924   | 28.4795     |
| 18  | A    | 847.2518   | 0.5337      | 41.7441   | 0.0484      |
| 19  | A    | 894.2702   | 1.6759      | 66.0572   | 0.6800      |
| 20  | A    | 1124.8989  | 1.4394      | 34.4493   | 1.1593      |
| 21  | A    | 1156.9553  | 2.7293      | 54.2312   | 3.2882      |
| 22  | A    | 1212.9366  | 1.9643      | 66.7962   | 0.6149      |
| 23  | A    | 1268.2112  | 3.1901      | 108.3914  | 0.5886      |
| 24  | A    | 1429.6764  | 10.0288     | 0.5669    | 8.6625      |
| 25  | A    | 1442.7424  | 9.2789      | 112.7583  | 8.2583      |
| 26  | A    | 1475.4102  | 9.6320      | 28.7757   | 1.8493      |
| 27  | A    | 1536.5272  | 8.1247      | 627.7012  | 7.9049      |
| 28  | A    | 1636.2727  | 2.2094      | 115.6019  | 0.5516      |
| 29  | A    | 1655.2742  | 10.4679     | 1.8671    | 7.4529      |
| 30  | A    | 1696.6465  | 10.9552     | 53.8600   | 31.0216     |
| 31  | A    | 3251.8839  | 6.8181      | 2.6095    | 98.4310     |
| 32  | A    | 3595.0059  | 7.9757      | 55.0814   | 187.9388    |
| 33  | A    | 3715.7953  | 8.9493      | 45.6004   | 42.5719     |

py-08\_A\_o3lyp

| NM# | Symm | Wavenumber | Force Const | IR Intens | Raman Activ |
|-----|------|------------|-------------|-----------|-------------|
| 1   | A    | 111.7086   | 0.0716      | 1.6846    | 0.2754      |
| 2   | A    | 197.4765   | 0.2193      | 0.4192    | 0.6044      |
| 3   | A    | 280.5270   | 0.3336      | 5.1887    | 0.9587      |
| 4   | A    | 294.7566   | 0.3497      | 6.4370    | 1.3290      |
| 5   | A    | 300.2780   | 0.3242      | 3.2213    | 0.1186      |
| 6   | A    | 348.6138   | 0.5329      | 1.4567    | 0.1040      |
| 7   | A    | 391.6799   | 0.1197      | 13.5603   | 0.9505      |
| 8   | A    | 430.7332   | 0.2268      | 143.5105  | 1.2953      |
| 9   | A    | 448.8256   | 1.1485      | 1.6768    | 4.0035      |
| 10  | A    | 457.4297   | 0.4122      | 44.1350   | 1.8292      |
| 11  | A    | 485.5863   | 0.3023      | 123.9439  | 1.0405      |
| 12  | A    | 509.8908   | 1.4941      | 10.0751   | 12.7150     |
| 13  | A    | 635.5432   | 1.0760      | 2.0342    | 1.8465      |
| 14  | A    | 686.0997   | 3.0316      | 14.1502   | 1.2694      |
| 15  | A    | 692.4614   | 3.2561      | 1.8106    | 0.8889      |
| 16  | A    | 728.7693   | 2.7802      | 12.2337   | 1.6141      |
| 17  | A    | 751.5913   | 2.6068      | 12.7873   | 27.6284     |
| 18  | A    | 878.7002   | 0.6291      | 26.9474   | 0.2216      |
| 19  | A    | 886.5127   | 1.6327      | 84.0130   | 0.4964      |
| 20  | A    | 1100.7990  | 1.3529      | 48.7768   | 1.1058      |
| 21  | A    | 1134.6096  | 2.8694      | 53.2224   | 5.3866      |
| 22  | A    | 1196.6097  | 1.9047      | 74.1544   | 1.1473      |
| 23  | A    | 1245.2666  | 3.5018      | 130.6145  | 0.6423      |
| 24  | A    | 1367.8679  | 7.4833      | 62.8635   | 0.8208      |
| 25  | A    | 1417.0809  | 9.9839      | 46.2166   | 11.6602     |
| 26  | A    | 1465.2058  | 8.8740      | 37.9857   | 2.9233      |
| 27  | A    | 1521.8779  | 7.5366      | 646.4450  | 1.7786      |
| 28  | A    | 1628.6135  | 2.1604      | 124.6157  | 0.8615      |
| 29  | A    | 1633.2952  | 12.1551     | 7.8890    | 5.1758      |
| 30  | A    | 1685.0263  | 11.0239     | 90.6029   | 25.9967     |
| 31  | A    | 3222.2672  | 6.6901      | 1.1184    | 104.9797    |
| 32  | A    | 3608.7558  | 8.0286      | 65.1995   | 183.1863    |
| 33  | A    | 3728.6639  | 9.0291      | 48.0676   | 46.0502     |

py-08\_A\_pbe0

| NM# | Symm | Wavenumber | Force Const | IR Intens | Raman Activ |
|-----|------|------------|-------------|-----------|-------------|
| 1   | A    | 115.9857   | 0.0775      | 1.6169    | 0.2577      |
| 2   | A    | 200.6284   | 0.2225      | 0.5321    | 0.5777      |
| 3   | A    | 279.9531   | 0.3156      | 5.6360    | 0.8900      |
| 4   | A    | 299.5044   | 0.3341      | 2.9995    | 0.0992      |
| 5   | A    | 300.7591   | 0.3576      | 7.2372    | 1.2869      |
| 6   | A    | 353.2037   | 0.5438      | 1.3928    | 0.0879      |
| 7   | A    | 398.8548   | 0.1238      | 25.2510   | 0.9789      |
| 8   | A    | 414.9308   | 0.1558      | 232.2209  | 1.1554      |

|    |   |           |         |          |          |
|----|---|-----------|---------|----------|----------|
| 9  | A | 455.2393  | 0.8876  | 3.4964   | 3.4574   |
| 10 | A | 459.9018  | 0.5419  | 19.4884  | 2.9737   |
| 11 | A | 483.4758  | 0.4080  | 46.3574  | 0.6072   |
| 12 | A | 517.9874  | 1.6018  | 7.1259   | 11.1039  |
| 13 | A | 640.9730  | 1.0702  | 2.7307   | 1.8290   |
| 14 | A | 700.0516  | 3.1758  | 12.5696  | 1.1029   |
| 15 | A | 704.9431  | 3.4423  | 1.9800   | 0.9428   |
| 16 | A | 741.9165  | 3.0032  | 13.2742  | 1.3916   |
| 17 | A | 768.2907  | 2.7502  | 11.3235  | 28.0893  |
| 18 | A | 892.8288  | 0.6453  | 29.0916  | 0.2202   |
| 19 | A | 902.3042  | 1.5388  | 76.7272  | 0.5110   |
| 20 | A | 1111.1153 | 1.3541  | 45.9801  | 1.1668   |
| 21 | A | 1159.1396 | 2.1744  | 62.8377  | 3.9971   |
| 22 | A | 1216.5510 | 2.3316  | 34.2497  | 1.5691   |
| 23 | A | 1271.2306 | 4.7521  | 155.6904 | 0.4221   |
| 24 | A | 1374.1558 | 7.6684  | 66.4428  | 1.1031   |
| 25 | A | 1454.6486 | 10.1765 | 42.1626  | 12.4779  |
| 26 | A | 1496.8647 | 8.4149  | 40.3303  | 2.6097   |
| 27 | A | 1553.7898 | 6.6973  | 619.5746 | 2.0726   |
| 28 | A | 1639.0832 | 2.2743  | 215.3317 | 1.7961   |
| 29 | A | 1671.5695 | 14.5174 | 9.9266   | 5.3769   |
| 30 | A | 1720.7140 | 14.3943 | 84.7751  | 26.6436  |
| 31 | A | 3238.0050 | 6.7591  | 2.0489   | 100.2762 |
| 32 | A | 3629.7006 | 8.1205  | 77.6784  | 167.0422 |
| 33 | A | 3751.5071 | 9.1464  | 57.4680  | 42.5264  |

py-08\_A\_pbe

| NM# | Symm | Wavenumber | Force Const | IR Intens | Raman Activ |
|-----|------|------------|-------------|-----------|-------------|
| 1   | A    | 108.1504   | 0.0680      | 1.6051    | 0.3201      |
| 2   | A    | 189.7332   | 0.2023      | 0.4167    | 0.6501      |
| 3   | A    | 268.9246   | 0.2990      | 5.1908    | 1.1556      |
| 4   | A    | 285.1871   | 0.3441      | 5.1295    | 1.2717      |
| 5   | A    | 288.0228   | 0.2992      | 3.3962    | 0.1340      |
| 6   | A    | 337.7466   | 0.5017      | 1.2744    | 0.1088      |
| 7   | A    | 386.8197   | 0.1398      | 6.5247    | 1.2279      |
| 8   | A    | 411.1555   | 0.1503      | 200.4192  | 0.6840      |
| 9   | A    | 435.5762   | 0.5670      | 9.3959    | 3.0083      |
| 10  | A    | 440.2120   | 0.5688      | 16.6701   | 3.1600      |
| 11  | A    | 465.2433   | 0.3044      | 80.1765   | 0.8825      |
| 12  | A    | 495.8329   | 1.4299      | 8.9163    | 14.1200     |
| 13  | A    | 614.1210   | 0.9898      | 1.7228    | 2.1035      |
| 14  | A    | 661.2415   | 2.8384      | 3.5599    | 0.4695      |
| 15  | A    | 666.9709   | 3.0119      | 13.2728   | 1.5534      |
| 16  | A    | 696.5736   | 2.7325      | 9.4537    | 1.1037      |
| 17  | A    | 735.5023   | 2.5218      | 13.0861   | 29.5145     |
| 18  | A    | 838.8980   | 0.5636      | 28.1170   | 0.2409      |
| 19  | A    | 861.2572   | 1.5191      | 82.7964   | 0.6150      |

|    |   |           |         |          |          |
|----|---|-----------|---------|----------|----------|
| 20 | A | 1066.3040 | 1.2793  | 48.0974  | 1.1585   |
| 21 | A | 1093.6220 | 2.5377  | 52.5563  | 6.1764   |
| 22 | A | 1159.9879 | 1.9432  | 84.4004  | 1.5691   |
| 23 | A | 1209.5607 | 3.0497  | 111.6605 | 0.9342   |
| 24 | A | 1354.5429 | 7.7476  | 48.7447  | 0.2681   |
| 25 | A | 1378.6940 | 8.9739  | 84.4117  | 10.0197  |
| 26 | A | 1424.0657 | 8.6201  | 31.8758  | 4.1250   |
| 27 | A | 1478.8951 | 6.4394  | 570.6996 | 1.0160   |
| 28 | A | 1577.1931 | 2.1445  | 132.4825 | 0.7415   |
| 29 | A | 1582.9275 | 9.6805  | 8.1764   | 6.9299   |
| 30 | A | 1639.3295 | 11.0640 | 97.7571  | 19.5714  |
| 31 | A | 3151.0686 | 6.3940  | 1.6671   | 110.2562 |
| 32 | A | 3511.4633 | 7.5973  | 62.7824  | 199.2311 |
| 33 | A | 3629.6778 | 8.5572  | 47.8267  | 49.0437  |

py-08\_A\_rtpss

| NM# | Symm | Wavenumber | Force Const | IR Intens | Raman Activ |
|-----|------|------------|-------------|-----------|-------------|
| 1   | A    | 110.8421   | 0.0702      | 1.7449    | 0.2989      |
| 2   | A    | 191.2337   | 0.2063      | 0.5338    | 0.6116      |
| 3   | A    | 262.7154   | 0.2764      | 5.4017    | 1.0501      |
| 4   | A    | 282.4334   | 0.2994      | 2.1830    | 0.0824      |
| 5   | A    | 288.9951   | 0.3299      | 6.8260    | 1.2933      |
| 6   | A    | 336.3284   | 0.4473      | 1.5838    | 0.0899      |
| 7   | A    | 380.6680   | 0.1276      | 8.9103    | 1.1252      |
| 8   | A    | 428.3561   | 0.3438      | 18.6980   | 2.1463      |
| 9   | A    | 436.3378   | 1.1613      | 0.9861    | 4.0061      |
| 10  | A    | 446.8164   | 0.4610      | 12.8812   | 0.1931      |
| 11  | A    | 495.6362   | 1.5405      | 3.6254    | 13.1406     |
| 12  | A    | 522.9769   | 0.2254      | 312.7976  | 2.3102      |
| 13  | A    | 612.2861   | 1.0114      | 1.5379    | 2.3778      |
| 14  | A    | 657.2189   | 2.8897      | 2.5261    | 0.4725      |
| 15  | A    | 673.1194   | 2.5974      | 13.9627   | 1.6539      |
| 16  | A    | 692.1543   | 2.9568      | 15.6226   | 1.5400      |
| 17  | A    | 739.1459   | 2.4659      | 15.6479   | 29.6723     |
| 18  | A    | 860.9633   | 0.5822      | 28.3183   | 0.2004      |
| 19  | A    | 865.5003   | 1.6335      | 84.9838   | 0.5776      |
| 20  | A    | 1087.4075  | 1.3706      | 45.0390   | 1.2139      |
| 21  | A    | 1099.5684  | 3.2509      | 51.7787   | 6.6895      |
| 22  | A    | 1177.7603  | 1.9788      | 118.5460  | 0.8636      |
| 23  | A    | 1223.9190  | 2.5242      | 86.9026   | 0.9967      |
| 24  | A    | 1358.7222  | 7.2871      | 23.8956   | 0.3414      |
| 25  | A    | 1385.9983  | 9.3213      | 66.6995   | 9.8979      |
| 26  | A    | 1432.8131  | 8.8732      | 38.8052   | 3.7562      |
| 27  | A    | 1486.3328  | 7.4528      | 623.0100  | 1.4289      |
| 28  | A    | 1597.4327  | 9.9381      | 8.8862    | 7.5904      |
| 29  | A    | 1616.4714  | 2.2577      | 65.5605   | 1.3024      |
| 30  | A    | 1655.9119  | 7.5772      | 100.1484  | 19.0362     |

|    |   |           |        |         |          |
|----|---|-----------|--------|---------|----------|
| 31 | A | 3182.0792 | 6.5213 | 0.2301  | 113.4297 |
| 32 | A | 3501.6465 | 7.5582 | 40.0437 | 197.9430 |
| 33 | A | 3614.5651 | 8.4753 | 33.8460 | 54.5765  |

py-08\_A\_tpssh

| NM# | Symm | Wavenumber | Force Const | IR Intens | Raman Activ |
|-----|------|------------|-------------|-----------|-------------|
| 1   | A    | 113.2600   | 0.0738      | 1.6922    | 0.2817      |
| 2   | A    | 196.2686   | 0.2161      | 0.4837    | 0.5988      |
| 3   | A    | 269.6724   | 0.2771      | 5.8008    | 1.0223      |
| 4   | A    | 289.5580   | 0.3334      | 2.0491    | 0.0665      |
| 5   | A    | 294.8812   | 0.3471      | 6.7429    | 1.2956      |
| 6   | A    | 343.6271   | 0.5058      | 1.4773    | 0.0891      |
| 7   | A    | 392.6970   | 0.1320      | 8.1904    | 1.1695      |
| 8   | A    | 433.0751   | 0.2391      | 99.2790   | 1.3635      |
| 9   | A    | 445.4033   | 1.1692      | 2.9207    | 3.8466      |
| 10  | A    | 455.0656   | 0.4133      | 43.4494   | 1.2472      |
| 11  | A    | 487.3022   | 0.2601      | 181.4962  | 1.3482      |
| 12  | A    | 506.5576   | 1.4162      | 12.6718   | 12.8218     |
| 13  | A    | 625.6428   | 1.0491      | 1.8851    | 2.0876      |
| 14  | A    | 679.7638   | 3.0276      | 3.8290    | 0.3819      |
| 15  | A    | 685.8538   | 3.0806      | 12.0530   | 2.0602      |
| 16  | A    | 716.2396   | 3.0269      | 11.8158   | 1.4020      |
| 17  | A    | 751.2833   | 2.5883      | 14.1922   | 28.7588     |
| 18  | A    | 880.6573   | 1.5479      | 83.4333   | 0.4901      |
| 19  | A    | 882.5950   | 0.6342      | 30.2335   | 0.2083      |
| 20  | A    | 1098.7447  | 1.3779      | 48.1623   | 1.2009      |
| 21  | A    | 1125.9254  | 3.2541      | 50.7367   | 5.7986      |
| 22  | A    | 1198.8474  | 1.9282      | 95.1515   | 0.8582      |
| 23  | A    | 1244.3541  | 3.1365      | 113.6996  | 0.7281      |
| 24  | A    | 1358.9629  | 7.0810      | 40.7032   | 0.8514      |
| 25  | A    | 1411.0577  | 9.8011      | 49.0297   | 10.7559     |
| 26  | A    | 1457.5342  | 9.0159      | 40.0747   | 3.2836      |
| 27  | A    | 1513.3513  | 7.6524      | 656.3585  | 1.8621      |
| 28  | A    | 1626.1416  | 8.9337      | 18.4957   | 5.8914      |
| 29  | A    | 1635.2686  | 2.3302      | 86.4847   | 1.8803      |
| 30  | A    | 1680.7550  | 9.2087      | 102.4578  | 22.5127     |
| 31  | A    | 3219.0984  | 6.6766      | 0.9037    | 107.2860    |
| 32  | A    | 3567.8384  | 7.8460      | 58.1550   | 182.7631    |
| 33  | A    | 3685.5686  | 8.8211      | 44.8323   | 49.1000     |

py-08\_A\_wb97xd

| NM# | Symm | Wavenumber | Force Const | IR Intens | Raman Activ |
|-----|------|------------|-------------|-----------|-------------|
| 1   | A    | 116.7807   | 0.0786      | 1.5862    | 0.2366      |
| 2   | A    | 201.7700   | 0.2240      | 0.5380    | 0.5326      |

|    |   |           |         |          |          |
|----|---|-----------|---------|----------|----------|
| 3  | A | 283.2025  | 0.3136  | 6.0554   | 0.8946   |
| 4  | A | 301.1408  | 0.3467  | 8.3491   | 1.2718   |
| 5  | A | 302.4370  | 0.3562  | 2.7874   | 0.0935   |
| 6  | A | 354.2454  | 0.5491  | 1.3790   | 0.0919   |
| 7  | A | 392.0650  | 0.1112  | 83.4440  | 0.8122   |
| 8  | A | 409.3133  | 0.1535  | 192.1842 | 1.4828   |
| 9  | A | 457.9142  | 0.8927  | 3.4160   | 3.3304   |
| 10 | A | 462.3328  | 0.6047  | 17.6472  | 3.3072   |
| 11 | A | 483.9870  | 0.4505  | 33.1946  | 0.5185   |
| 12 | A | 519.7588  | 1.6249  | 7.0039   | 10.9509  |
| 13 | A | 644.2899  | 1.0898  | 3.0355   | 1.7008   |
| 14 | A | 700.2839  | 3.2050  | 14.3378  | 1.4703   |
| 15 | A | 709.4623  | 3.4622  | 1.2467   | 0.7361   |
| 16 | A | 747.5687  | 3.0166  | 14.2921  | 1.5994   |
| 17 | A | 768.0487  | 2.7525  | 11.8358  | 27.8379  |
| 18 | A | 901.9434  | 1.6069  | 82.9586  | 0.4603   |
| 19 | A | 906.8381  | 0.6692  | 29.2280  | 0.2288   |
| 20 | A | 1112.0344 | 1.3640  | 53.5367  | 1.2623   |
| 21 | A | 1158.6929 | 2.6661  | 57.4650  | 4.1662   |
| 22 | A | 1216.5715 | 1.9777  | 32.5603  | 0.8850   |
| 23 | A | 1267.6559 | 5.7033  | 175.7450 | 0.2930   |
| 24 | A | 1337.8336 | 5.5565  | 60.4863  | 1.8217   |
| 25 | A | 1448.3680 | 10.0571 | 36.7255  | 12.7922  |
| 26 | A | 1493.6226 | 8.8444  | 43.3815  | 2.1491   |
| 27 | A | 1551.5556 | 6.9617  | 644.5303 | 3.4778   |
| 28 | A | 1644.3535 | 2.2103  | 203.3163 | 1.8864   |
| 29 | A | 1676.5880 | 14.3801 | 12.2366  | 5.2184   |
| 30 | A | 1723.6876 | 14.0668 | 87.9004  | 30.1907  |
| 31 | A | 3235.1690 | 6.7499  | 1.4715   | 97.4931  |
| 32 | A | 3635.4649 | 8.1470  | 74.9912  | 154.4060 |
| 33 | A | 3756.4475 | 9.1715  | 54.6095  | 40.2749  |

-----

py-08\_A\_x3lyp

| NM# | Symm | Wavenumber | Force Const | IR Intens | Raman Activ |
|-----|------|------------|-------------|-----------|-------------|
| 1   | A    | 115.7386   | 0.0779      | 1.5773    | 0.2716      |
| 2   | A    | 198.2656   | 0.2184      | 0.4523    | 0.6006      |
| 3   | A    | 280.0902   | 0.3384      | 5.4516    | 0.9492      |
| 4   | A    | 297.5207   | 0.3730      | 5.5748    | 1.2769      |
| 5   | A    | 298.5406   | 0.3158      | 4.2981    | 0.1558      |
| 6   | A    | 348.8180   | 0.5440      | 1.3169    | 0.1054      |
| 7   | A    | 396.5026   | 0.1172      | 101.9961  | 0.8462      |
| 8   | A    | 404.3804   | 0.1583      | 168.3551  | 1.4052      |
| 9   | A    | 451.0699   | 0.4791      | 10.2333   | 2.6085      |
| 10  | A    | 457.2369   | 0.7618      | 10.8980   | 3.9709      |
| 11  | A    | 480.3526   | 0.4297      | 30.1709   | 0.4467      |
| 12  | A    | 514.9620   | 1.5865      | 7.6046    | 12.4698     |
| 13  | A    | 635.6545   | 1.0585      | 2.7207    | 1.8307      |



|    |   |           |         |          |          |
|----|---|-----------|---------|----------|----------|
| 14 | A | 691.8257  | 3.1427  | 15.1016  | 1.3079   |
| 15 | A | 698.2890  | 3.3240  | 1.9195   | 0.8316   |
| 16 | A | 737.5468  | 2.8950  | 13.2024  | 1.5179   |
| 17 | A | 759.8732  | 2.6981  | 13.0414  | 27.9679  |
| 18 | A | 887.8074  | 1.6285  | 87.0078  | 0.4586   |
| 19 | A | 894.2778  | 0.6513  | 27.5811  | 0.2123   |
| 20 | A | 1100.1648 | 1.3643  | 52.9466  | 1.1693   |
| 21 | A | 1136.6455 | 3.0930  | 50.6894  | 5.1610   |
| 22 | A | 1203.2056 | 1.8521  | 65.1928  | 0.8784   |
| 23 | A | 1252.1663 | 4.2074  | 145.0234 | 0.4711   |
| 24 | A | 1339.8225 | 6.1822  | 47.5900  | 1.3954   |
| 25 | A | 1420.7133 | 9.8225  | 41.3832  | 11.8789  |
| 26 | A | 1468.2998 | 9.0136  | 40.2094  | 2.9669   |
| 27 | A | 1523.2040 | 7.5112  | 661.6301 | 2.4947   |
| 28 | A | 1633.4723 | 2.3066  | 129.6212 | 0.6397   |
| 29 | A | 1638.2404 | 8.8629  | 15.1536  | 6.4782   |
| 30 | A | 1688.9673 | 11.1394 | 101.8756 | 26.7667  |
| 31 | A | 3218.2056 | 6.6734  | 1.6562   | 102.4293 |
| 32 | A | 3597.5678 | 7.9749  | 76.7993  | 171.3332 |
| 33 | A | 3715.2637 | 8.9727  | 54.8315  | 44.3830  |

py-08\_B\_b3lyp

| NM# | Symm | Wavenumber | Force Const | IR Intens | Raman Activ |
|-----|------|------------|-------------|-----------|-------------|
| 1   | A    | 114.9615   | 0.0765      | 1.6166    | 0.2738      |
| 2   | A    | 197.1986   | 0.2161      | 0.4719    | 0.5957      |
| 3   | A    | 280.5573   | 0.3439      | 5.3336    | 0.9569      |
| 4   | A    | 296.1449   | 0.3596      | 6.4017    | 1.2998      |
| 5   | A    | 298.8476   | 0.3181      | 3.6345    | 0.1338      |
| 6   | A    | 348.2670   | 0.5396      | 1.3405    | 0.1032      |
| 7   | A    | 397.2307   | 0.1298      | 23.7149   | 1.1037      |
| 8   | A    | 408.8233   | 0.1502      | 232.2232  | 1.1151      |
| 9   | A    | 450.1868   | 0.4655      | 14.8602   | 2.4474      |
| 10  | A    | 456.9590   | 0.7722      | 11.8999   | 3.9808      |
| 11  | A    | 479.5041   | 0.4058      | 40.6640   | 0.5623      |
| 12  | A    | 515.6014   | 1.5909      | 7.8460    | 12.5380     |
| 13  | A    | 634.9770   | 1.0601      | 2.5870    | 1.8531      |
| 14  | A    | 690.8681   | 3.0805      | 14.5785   | 1.0806      |
| 15  | A    | 695.2018   | 3.3311      | 2.6696    | 1.0267      |
| 16  | A    | 734.3525   | 2.8887      | 13.4079   | 1.4152      |
| 17  | A    | 760.3133   | 2.7029      | 13.4314   | 28.0692     |
| 18  | A    | 886.6971   | 1.6204      | 87.5688   | 0.4624      |
| 19  | A    | 890.3674   | 0.6480      | 27.9298   | 0.2156      |
| 20  | A    | 1099.8234  | 1.3635      | 53.4526   | 1.1966      |
| 21  | A    | 1133.5901  | 3.1034      | 49.8511   | 5.2076      |
| 22  | A    | 1201.8170  | 1.8517      | 68.9163   | 0.8857      |
| 23  | A    | 1250.7854  | 4.0756      | 140.8953  | 0.5102      |
| 24  | A    | 1340.1516  | 6.2081      | 45.4066   | 1.3733      |

|    |   |           |         |          |          |
|----|---|-----------|---------|----------|----------|
| 25 | A | 1419.4972 | 9.8765  | 44.7168  | 11.7238  |
| 26 | A | 1466.1374 | 8.9519  | 44.5502  | 2.9459   |
| 27 | A | 1520.0866 | 7.4338  | 649.6697 | 2.3121   |
| 28 | A | 1631.0665 | 2.7116  | 106.8367 | 1.0903   |
| 29 | A | 1634.2339 | 5.6461  | 30.2456  | 6.0662   |
| 30 | A | 1685.0885 | 10.7042 | 104.5302 | 26.1193  |
| 31 | A | 3216.6347 | 6.6665  | 1.5452   | 102.2118 |
| 32 | A | 3593.1860 | 7.9553  | 73.9050  | 171.9036 |
| 33 | A | 3710.6201 | 8.9492  | 53.3559  | 44.6502  |

py-08\_B\_m062x

| NM# | Symm | Wavenumber | Force Const | IR Intens | Raman Activ |
|-----|------|------------|-------------|-----------|-------------|
| 1   | A    | 119.3146   | 0.0812      | 1.6830    | 0.2517      |
| 2   | A    | 201.7105   | 0.2250      | 0.6009    | 0.5749      |
| 3   | A    | 282.6642   | 0.3884      | 4.7526    | 0.7102      |
| 4   | A    | 301.5254   | 0.2983      | 4.7235    | 0.2047      |
| 5   | A    | 302.7932   | 0.3611      | 7.6612    | 1.2403      |
| 6   | A    | 354.5039   | 0.5229      | 1.5838    | 0.0973      |
| 7   | A    | 390.7445   | 0.1117      | 27.6551   | 0.9485      |
| 8   | A    | 424.5507   | 0.1938      | 196.1300  | 1.6494      |
| 9   | A    | 457.6639   | 0.9785      | 5.7831    | 3.2916      |
| 10  | A    | 463.0355   | 0.5238      | 29.7524   | 3.0021      |
| 11  | A    | 485.7633   | 0.3666      | 82.6798   | 1.1989      |
| 12  | A    | 518.9641   | 1.6021      | 7.4272    | 10.3337     |
| 13  | A    | 640.7313   | 1.0729      | 3.4652    | 1.7712      |
| 14  | A    | 703.0218   | 3.0611      | 10.1068   | 0.5475      |
| 15  | A    | 707.5309   | 3.4669      | 3.9361    | 1.1800      |
| 16  | A    | 745.3397   | 3.1393      | 14.6787   | 1.3173      |
| 17  | A    | 772.1194   | 2.7917      | 9.6833    | 28.3903     |
| 18  | A    | 904.3143   | 0.6600      | 31.2611   | 0.2416      |
| 19  | A    | 908.4298   | 1.5022      | 70.9496   | 0.5394      |
| 20  | A    | 1113.6869  | 1.3497      | 46.5297   | 1.2417      |
| 21  | A    | 1172.7526  | 1.8914      | 65.4697   | 2.7950      |
| 22  | A    | 1219.1188  | 2.7717      | 6.3644    | 1.3370      |
| 23  | A    | 1278.6881  | 7.3922      | 185.6394  | 0.1985      |
| 24  | A    | 1325.5497  | 4.9583      | 47.5203   | 1.7928      |
| 25  | A    | 1467.1906  | 9.7585      | 19.4579   | 13.5633     |
| 26  | A    | 1506.6117  | 8.5638      | 33.7900   | 2.1791      |
| 27  | A    | 1558.8155  | 7.3367      | 660.8300  | 4.2199      |
| 28  | A    | 1639.0130  | 2.2467      | 237.1372  | 3.4356      |
| 29  | A    | 1685.8329  | 14.8371     | 11.7935   | 4.7610      |
| 30  | A    | 1728.5071  | 15.1894     | 68.5105   | 30.3904     |
| 31  | A    | 3243.7283  | 6.7854      | 3.9728    | 94.8308     |
| 32  | A    | 3616.4860  | 8.0627      | 88.7029   | 162.4251    |
| 33  | A    | 3737.2229  | 9.0778      | 65.5443   | 41.6924     |

py-08\_B\_mp2

| NM# | Symm | Wavenumber | Force Const | IR Intens | Raman Activ |
|-----|------|------------|-------------|-----------|-------------|
| 1   | A    | 112.1722   | 0.0710      | 1.6632    | 0.2200      |
| 2   | A    | 198.4409   | 0.2192      | 0.7092    | 0.4843      |
| 3   | A    | 281.2794   | 0.3100      | 5.3282    | 0.7786      |
| 4   | A    | 290.5026   | 0.3235      | 7.0949    | 1.1617      |
| 5   | A    | 301.0689   | 0.3242      | 2.2231    | 0.0841      |
| 6   | A    | 346.3693   | 0.2433      | 4.5074    | 0.1014      |
| 7   | A    | 360.6037   | 0.1146      | 13.4762   | 0.7599      |
| 8   | A    | 440.5713   | 0.7493      | 8.7787    | 2.9681      |
| 9   | A    | 445.3752   | 0.6183      | 0.9278    | 0.3362      |
| 10  | A    | 452.6730   | 1.2931      | 0.8493    | 4.1837      |
| 11  | A    | 510.9461   | 1.6540      | 4.3681    | 10.8460     |
| 12  | A    | 575.0581   | 1.0761      | 32.0148   | 2.1817      |
| 13  | A    | 614.7581   | 0.5794      | 162.6849  | 4.1129      |
| 14  | A    | 633.7610   | 1.1107      | 2.4024    | 2.3992      |
| 15  | A    | 667.1905   | 0.9992      | 127.4087  | 2.5473      |
| 16  | A    | 710.1376   | 1.6978      | 43.3798   | 3.4353      |
| 17  | A    | 753.6653   | 2.2593      | 18.2917   | 28.4794     |
| 18  | A    | 847.2519   | 0.5337      | 41.7437   | 0.0485      |
| 19  | A    | 894.2702   | 1.6759      | 66.0574   | 0.6800      |
| 20  | A    | 1124.8987  | 1.4394      | 34.4494   | 1.1593      |
| 21  | A    | 1156.9555  | 2.7293      | 54.2314   | 3.2882      |
| 22  | A    | 1212.9371  | 1.9643      | 66.7945   | 0.6149      |
| 23  | A    | 1268.2111  | 3.1901      | 108.3924  | 0.5886      |
| 24  | A    | 1429.6772  | 10.0288     | 0.5672    | 8.6628      |
| 25  | A    | 1442.7425  | 9.2790      | 112.7591  | 8.2582      |
| 26  | A    | 1475.4108  | 9.6319      | 28.7759   | 1.8491      |
| 27  | A    | 1536.5270  | 8.1248      | 627.7032  | 7.9048      |
| 28  | A    | 1636.2728  | 2.2094      | 115.6005  | 0.5516      |
| 29  | A    | 1655.2749  | 10.4683     | 1.8662    | 7.4528      |
| 30  | A    | 1696.6461  | 10.9552     | 53.8609   | 31.0218     |
| 31  | A    | 3251.8849  | 6.8181      | 2.6095    | 98.4310     |
| 32  | A    | 3595.0055  | 7.9757      | 55.0818   | 187.9389    |
| 33  | A    | 3715.7951  | 8.9493      | 45.6006   | 42.5718     |

py-08\_C\_b31yp

| NM# | Symm | Wavenumber | Force Const | IR Intens | Raman Activ |
|-----|------|------------|-------------|-----------|-------------|
| 1   | A    | 101.4827   | 0.0605      | 1.0681    | 1.1209      |
| 2   | A    | 159.1761   | 0.1805      | 1.2656    | 1.5305      |
| 3   | A    | 256.5575   | 0.3153      | 4.4133    | 1.1649      |
| 4   | A    | 279.4274   | 0.7441      | 0.2741    | 0.8054      |
| 5   | A    | 318.9508   | 0.4583      | 3.5388    | 0.9479      |
| 6   | A    | 344.4651   | 0.7027      | 3.1741    | 1.5343      |
| 7   | A    | 360.1763   | 0.4021      | 2.2970    | 1.9144      |

|    |   |           |         |          |          |
|----|---|-----------|---------|----------|----------|
| 8  | A | 427.1021  | 0.4015  | 1.8842   | 0.1375   |
| 9  | A | 435.3837  | 1.3274  | 1.6592   | 3.5896   |
| 10 | A | 504.5430  | 1.8194  | 0.8142   | 10.8145  |
| 11 | A | 546.0789  | 0.2138  | 100.2328 | 0.4318   |
| 12 | A | 638.2596  | 1.0202  | 2.1000   | 3.6485   |
| 13 | A | 639.1756  | 2.4312  | 5.2764   | 2.8601   |
| 14 | A | 705.3587  | 2.7239  | 26.5019  | 3.8315   |
| 15 | A | 712.3016  | 1.9170  | 1.9766   | 1.4123   |
| 16 | A | 741.3467  | 2.5796  | 38.9921  | 16.8771  |
| 17 | A | 778.5235  | 0.4261  | 49.2874  | 0.3500   |
| 18 | A | 878.9430  | 1.5617  | 105.5196 | 0.4972   |
| 19 | A | 881.7554  | 0.6281  | 37.1131  | 0.9336   |
| 20 | A | 1098.1827 | 1.3481  | 131.1804 | 8.5130   |
| 21 | A | 1155.9236 | 2.0521  | 63.8303  | 3.4850   |
| 22 | A | 1217.0700 | 2.9209  | 56.9793  | 4.6410   |
| 23 | A | 1270.4516 | 2.5406  | 114.9712 | 13.8961  |
| 24 | A | 1291.8980 | 2.3272  | 81.4524  | 1.6308   |
| 25 | A | 1334.9900 | 3.6582  | 36.7750  | 28.3304  |
| 26 | A | 1443.8142 | 5.6780  | 48.9615  | 16.3168  |
| 27 | A | 1499.8049 | 5.9217  | 33.0140  | 71.5191  |
| 28 | A | 1624.1224 | 13.7439 | 16.5627  | 38.8623  |
| 29 | A | 1674.0496 | 9.1400  | 675.7327 | 152.9517 |
| 30 | A | 1745.2486 | 17.9390 | 106.3470 | 8.2246   |
| 31 | A | 3208.0359 | 6.6262  | 2.1998   | 114.9216 |
| 32 | A | 3540.1977 | 7.9344  | 32.6635  | 89.0527  |
| 33 | A | 3596.6229 | 8.2107  | 102.2660 | 74.1748  |

py-08\_C\_m062x

| NM# | Symm | Wavenumber | Force Const | IR Intens | Raman Activ |
|-----|------|------------|-------------|-----------|-------------|
| 1   | A    | 101.6522   | 0.0596      | 0.8806    | 1.1681      |
| 2   | A    | 160.4358   | 0.1856      | 0.9131    | 1.5196      |
| 3   | A    | 262.6534   | 0.3257      | 5.2015    | 1.0960      |
| 4   | A    | 279.3614   | 0.7535      | 0.4884    | 0.6332      |
| 5   | A    | 324.8974   | 0.4686      | 3.7574    | 1.1824      |
| 6   | A    | 350.0495   | 0.7411      | 3.4609    | 1.5999      |
| 7   | A    | 368.3430   | 0.3670      | 3.2023    | 1.6629      |
| 8   | A    | 431.8551   | 0.4454      | 1.3857    | 0.1602      |
| 9   | A    | 436.4635   | 1.3072      | 1.9228    | 3.1705      |
| 10  | A    | 507.5214   | 1.8161      | 0.5493    | 9.1996      |
| 11  | A    | 543.4724   | 0.2143      | 105.5250  | 0.4869      |
| 12  | A    | 643.3257   | 1.0237      | 1.6913    | 4.0910      |
| 13  | A    | 648.2880   | 2.5444      | 5.6329    | 2.8586      |
| 14  | A    | 712.3257   | 2.2127      | 1.6297    | 2.1037      |
| 15  | A    | 714.5379   | 2.7837      | 24.5761   | 3.6982      |
| 16  | A    | 749.0389   | 2.6371      | 37.0752   | 13.6140     |
| 17  | A    | 795.0733   | 0.4372      | 50.7241   | 0.4150      |
| 18  | A    | 893.2779   | 0.6370      | 42.4655   | 1.1255      |

|    |   |           |         |          |          |
|----|---|-----------|---------|----------|----------|
| 19 | A | 896.8014  | 1.4553  | 95.1104  | 0.6866   |
| 20 | A | 1117.1887 | 1.2358  | 120.7278 | 8.4804   |
| 21 | A | 1182.3277 | 1.5360  | 58.0366  | 2.5506   |
| 22 | A | 1244.2071 | 4.7495  | 59.8471  | 6.8247   |
| 23 | A | 1291.5835 | 2.0814  | 98.6904  | 7.6704   |
| 24 | A | 1314.7991 | 2.9784  | 89.6509  | 4.9478   |
| 25 | A | 1362.0678 | 5.2556  | 39.7961  | 48.0999  |
| 26 | A | 1476.8121 | 6.2895  | 63.4074  | 8.9938   |
| 27 | A | 1535.1905 | 7.5819  | 42.1504  | 77.7588  |
| 28 | A | 1681.3345 | 15.3714 | 11.5718  | 53.9191  |
| 29 | A | 1725.7055 | 11.6368 | 753.4419 | 166.2757 |
| 30 | A | 1803.3414 | 19.7137 | 113.8253 | 10.0283  |
| 31 | A | 3236.6859 | 6.7510  | 5.3142   | 103.1550 |
| 32 | A | 3575.3214 | 8.0946  | 49.1842  | 79.9802  |
| 33 | A | 3619.5013 | 8.3182  | 123.6718 | 72.4779  |

py-08\_C\_mp2

| NM# | Symm | Wavenumber | Force Const | IR Intens | Raman Activ |
|-----|------|------------|-------------|-----------|-------------|
| 1   | A    | 92.1903    | 0.0489      | 1.2129    | 1.4989      |
| 2   | A    | 154.4658   | 0.1779      | 0.8723    | 1.4654      |
| 3   | A    | 253.4874   | 0.3072      | 4.4471    | 1.3778      |
| 4   | A    | 278.2920   | 0.7209      | 0.3596    | 0.7685      |
| 5   | A    | 319.5201   | 0.4362      | 3.8927    | 2.2360      |
| 6   | A    | 341.2094   | 0.6430      | 2.9930    | 1.6030      |
| 7   | A    | 361.7120   | 0.4591      | 2.1013    | 1.8815      |
| 8   | A    | 409.3058   | 0.4524      | 0.5294    | 0.4082      |
| 9   | A    | 432.8737   | 1.2764      | 1.8368    | 3.1973      |
| 10  | A    | 502.1347   | 1.5106      | 3.0854    | 9.6582      |
| 11  | A    | 545.9121   | 0.2630      | 72.6725   | 0.6654      |
| 12  | A    | 555.4978   | 0.8158      | 42.0645   | 4.4634      |
| 13  | A    | 627.2967   | 1.7489      | 4.3414    | 3.7652      |
| 14  | A    | 639.3654   | 1.1904      | 3.8887    | 3.9174      |
| 15  | A    | 708.2488   | 2.4662      | 26.4759   | 3.7789      |
| 16  | A    | 737.2374   | 0.4328      | 30.2945   | 2.6705      |
| 17  | A    | 740.1198   | 1.1507      | 30.4769   | 11.4156     |
| 18  | A    | 853.6248   | 0.5522      | 44.0077   | 0.8788      |
| 19  | A    | 881.3081   | 1.5430      | 92.4462   | 0.3446      |
| 20  | A    | 1121.7670  | 1.2652      | 110.8747  | 7.5131      |
| 21  | A    | 1172.1090  | 1.9620      | 56.9922   | 4.1987      |
| 22  | A    | 1228.0007  | 2.9862      | 51.2519   | 3.3618      |
| 23  | A    | 1281.4595  | 2.3681      | 91.5572   | 8.4417      |
| 24  | A    | 1306.5930  | 2.0729      | 84.2260   | 0.6170      |
| 25  | A    | 1373.3120  | 6.9260      | 31.4752   | 65.5538     |
| 26  | A    | 1469.8347  | 5.8457      | 41.1531   | 9.3117      |
| 27  | A    | 1514.3405  | 7.8245      | 25.6554   | 141.3295    |
| 28  | A    | 1621.8937  | 13.7801     | 59.0385   | 24.1936     |
| 29  | A    | 1681.2764  | 9.1666      | 557.3731  | 227.8329    |

|    |   |           |         |          |          |
|----|---|-----------|---------|----------|----------|
| 30 | A | 1757.5599 | 18.8698 | 88.0234  | 5.2739   |
| 31 | A | 3244.8574 | 6.7823  | 3.6751   | 109.3137 |
| 32 | A | 3559.1980 | 8.0200  | 35.9428  | 75.3534  |
| 33 | A | 3607.3583 | 8.2598  | 109.5791 | 80.0823  |

py-10\_A\_b3lyp

| NM# | Symm | Wavenumber | Force Const | IR Intens | Raman Activ |
|-----|------|------------|-------------|-----------|-------------|
| 1   | A''  | 93.4857    | 0.1098      | 0.0000    | 0.0226      |
| 2   | A'   | 98.6693    | 0.0871      | 16.5584   | 0.8619      |
| 3   | A'   | 147.5197   | 0.0147      | 183.0340  | 4.7914      |
| 4   | A'   | 204.1916   | 0.5566      | 0.2964    | 1.7412      |
| 5   | A'   | 209.0240   | 0.2433      | 0.0048    | 0.7439      |
| 6   | A''  | 247.9885   | 0.5889      | 0.7532    | 0.7140      |
| 7   | A'   | 306.7919   | 0.6513      | 0.6520    | 0.2595      |
| 8   | A'   | 321.3928   | 1.3630      | 0.2695    | 4.5234      |
| 9   | A''  | 327.9412   | 0.2999      | 3.3148    | 0.0053      |
| 10  | A''  | 363.7722   | 0.4547      | 0.1240    | 0.0319      |
| 11  | A'   | 407.3376   | 1.4512      | 2.0982    | 6.1548      |
| 12  | A''  | 410.3759   | 1.0057      | 1.6097    | 4.6646      |
| 13  | A''  | 509.5307   | 0.1708      | 0.9762    | 0.1171      |
| 14  | A'   | 598.3072   | 2.0928      | 0.0116    | 20.8120     |
| 15  | A'   | 617.6277   | 3.0252      | 5.2984    | 10.9316     |
| 16  | A'   | 660.7588   | 2.8927      | 4.1016    | 1.2975      |
| 17  | A''  | 677.5488   | 1.4220      | 0.2059    | 0.1901      |
| 18  | A''  | 688.0299   | 3.3750      | 0.0005    | 1.0289      |
| 19  | A''  | 746.7836   | 3.1388      | 85.8776   | 0.0463      |
| 20  | A'   | 760.6064   | 4.0581      | 16.6517   | 1.5379      |
| 21  | A''  | 1071.5840  | 2.8660      | 0.0982    | 0.6062      |
| 22  | A'   | 1088.1736  | 8.0092      | 176.8121  | 1.7912      |
| 23  | A''  | 1118.7401  | 1.6726      | 108.0801  | 0.2109      |
| 24  | A'   | 1136.2175  | 6.6608      | 0.0109    | 3.5248      |
| 25  | A''  | 1353.4151  | 7.8306      | 29.2422   | 27.2424     |
| 26  | A'   | 1422.5888  | 14.3209     | 98.8970   | 7.5448      |
| 27  | A''  | 1455.7431  | 13.0731     | 354.6163  | 1.3547      |
| 28  | A'   | 1501.6098  | 5.5704      | 22.1787   | 1.3569      |
| 29  | A''  | 1605.5824  | 14.6894     | 92.5609   | 3.6240      |
| 30  | A'   | 1619.2920  | 3.9426      | 32.4732   | 5.9492      |
| 31  | A'   | 1657.4325  | 3.6825      | 514.1018  | 13.1323     |
| 32  | A'   | 3608.0522  | 8.0141      | 85.7969   | 106.0652    |
| 33  | A''  | 3729.7630  | 9.0619      | 77.4429   | 17.9646     |

py-10\_A\_b3p86

| NM# | Symm | Wavenumber | Force Const | IR Intens | Raman Activ |
|-----|------|------------|-------------|-----------|-------------|
| 1   | A'   | 87.0598    | 0.0188      | 76.4295   | 2.0655      |

|    |     |           |         |          |          |
|----|-----|-----------|---------|----------|----------|
| 2  | A'' | 94.1633   | 0.1114  | 0.0000   | 0.0240   |
| 3  | A'  | 127.4568  | 0.0137  | 120.9502 | 2.2987   |
| 4  | A'  | 201.5851  | 0.5396  | 0.2997   | 1.6831   |
| 5  | A'  | 210.7103  | 0.2361  | 0.1062   | 0.7243   |
| 6  | A'' | 245.4156  | 0.5369  | 0.8879   | 0.6835   |
| 7  | A'  | 308.5099  | 0.6565  | 0.7747   | 0.2426   |
| 8  | A'  | 322.2807  | 1.3659  | 0.2588   | 4.2628   |
| 9  | A'' | 323.5640  | 0.2847  | 3.3545   | 0.0018   |
| 10 | A'' | 366.6931  | 0.4523  | 0.0708   | 0.0206   |
| 11 | A'  | 411.0265  | 1.4600  | 1.9992   | 5.5190   |
| 12 | A'' | 411.7931  | 1.0421  | 1.7495   | 4.4544   |
| 13 | A'' | 515.2876  | 0.1752  | 0.5592   | 0.0989   |
| 14 | A'  | 599.6313  | 2.1424  | 0.0513   | 20.5326  |
| 15 | A'  | 620.2590  | 3.0177  | 4.1329   | 10.7826  |
| 16 | A'  | 664.3840  | 2.9116  | 3.7541   | 1.0410   |
| 17 | A'' | 678.3823  | 1.4070  | 0.3395   | 0.2412   |
| 18 | A'' | 692.5709  | 3.4210  | 0.0003   | 0.9888   |
| 19 | A'' | 759.5111  | 3.1004  | 78.5710  | 0.0110   |
| 20 | A'  | 761.6707  | 4.0750  | 17.2781  | 1.1441   |
| 21 | A'' | 1082.4782 | 1.9358  | 4.5280   | 0.4287   |
| 22 | A'  | 1099.7918 | 8.2316  | 171.7074 | 1.7880   |
| 23 | A'' | 1126.3821 | 2.3016  | 95.4954  | 0.1536   |
| 24 | A'  | 1150.8357 | 6.6007  | 0.0104   | 3.6883   |
| 25 | A'' | 1384.0365 | 8.9873  | 36.3107  | 26.7779  |
| 26 | A'  | 1440.8287 | 14.4030 | 99.3364  | 6.8833   |
| 27 | A'' | 1476.5885 | 13.9152 | 358.2205 | 1.4750   |
| 28 | A'  | 1516.0858 | 4.2622  | 13.5744  | 1.2695   |
| 29 | A'  | 1624.1653 | 2.9883  | 4.4822   | 2.8839   |
| 30 | A'' | 1629.9183 | 15.8568 | 101.9830 | 3.5457   |
| 31 | A'  | 1671.3957 | 7.2885  | 562.7055 | 15.1768  |
| 32 | A'  | 3620.7494 | 8.0714  | 87.9177  | 104.1050 |
| 33 | A'' | 3746.6190 | 9.1451  | 82.4996  | 17.1865  |

py-10\_A\_b3pw91

| NM# | Symm | Wavenumber | Force Const | IR Intens | Raman Activ |
|-----|------|------------|-------------|-----------|-------------|
| 1   | A'   | 86.3185    | 0.0180      | 78.6842   | 2.1986      |
| 2   | A''  | 93.5182    | 0.1098      | 0.0000    | 0.0208      |
| 3   | A'   | 125.9796   | 0.0135      | 119.1120  | 2.3987      |
| 4   | A'   | 201.7720   | 0.5407      | 0.3046    | 1.7087      |
| 5   | A'   | 211.3525   | 0.2384      | 0.1142    | 0.7312      |
| 6   | A''  | 245.7904   | 0.5379      | 0.8810    | 0.6886      |
| 7   | A'   | 308.6283   | 0.6523      | 0.8006    | 0.2349      |
| 8   | A'   | 321.7124   | 1.3634      | 0.2460    | 4.3181      |
| 9   | A''  | 323.2690   | 0.2857      | 3.3817    | 0.0017      |
| 10  | A''  | 367.8109   | 0.4409      | 0.0811    | 0.0210      |
| 11  | A'   | 410.0641   | 1.4520      | 1.9916    | 5.4589      |
| 12  | A''  | 410.8396   | 1.0339      | 1.7386    | 4.4691      |

|    |     |           |         |          |          |
|----|-----|-----------|---------|----------|----------|
| 13 | A'' | 512.9530  | 0.1748  | 0.5900   | 0.1351   |
| 14 | A'  | 597.8914  | 2.1214  | 0.0514   | 20.6973  |
| 15 | A'  | 618.5889  | 3.0200  | 4.2566   | 10.6586  |
| 16 | A'  | 665.0331  | 2.9197  | 4.0248   | 1.0327   |
| 17 | A'' | 677.8557  | 1.4042  | 0.2716   | 0.2291   |
| 18 | A'' | 693.3921  | 3.4308  | 0.0003   | 1.0017   |
| 19 | A'' | 757.2094  | 3.1127  | 79.4756  | 0.0139   |
| 20 | A'  | 763.7821  | 4.0909  | 16.8982  | 1.2181   |
| 21 | A'' | 1080.0675 | 2.0511  | 2.8031   | 0.4469   |
| 22 | A'  | 1096.3787 | 8.1739  | 172.3809 | 1.7446   |
| 23 | A'' | 1123.3715 | 2.1501  | 98.7130  | 0.1646   |
| 24 | A'  | 1146.9570 | 6.6093  | 0.0064   | 3.7620   |
| 25 | A'' | 1378.6841 | 8.8066  | 33.6451  | 27.0801  |
| 26 | A'  | 1435.8032 | 14.3058 | 98.4747  | 7.0162   |
| 27 | A'' | 1471.6871 | 13.7294 | 357.6646 | 1.3985   |
| 28 | A'  | 1512.9873 | 4.5163  | 16.5648  | 1.2492   |
| 29 | A'  | 1623.3642 | 3.0410  | 0.8557   | 3.3165   |
| 30 | A'' | 1625.7062 | 15.7511 | 102.1970 | 3.4141   |
| 31 | A'  | 1667.6652 | 6.4127  | 561.2357 | 15.0154  |
| 32 | A'  | 3621.5926 | 8.0752  | 86.6990  | 105.0392 |
| 33 | A'' | 3747.0678 | 9.1470  | 80.6265  | 17.6288  |

py-10\_A\_blyp

| NM# | Symm | Wavenumber | Force Const | IR Intens | Raman Activ |
|-----|------|------------|-------------|-----------|-------------|
| 1   | A''  | 87.8219    | 0.0970      | 0.0000    | 0.0202      |
| 2   | A'   | 99.9739    | 0.0735      | 0.2569    | 0.1674      |
| 3   | A'   | 195.1032   | 0.4846      | 0.5432    | 2.1685      |
| 4   | A'   | 199.9851   | 0.1654      | 1.9399    | 0.7473      |
| 5   | A'   | 224.2238   | 0.0364      | 195.3413  | 5.0765      |
| 6   | A''  | 237.0208   | 0.5352      | 0.5448    | 0.8279      |
| 7   | A'   | 294.6029   | 0.5957      | 0.7304    | 0.2902      |
| 8   | A'   | 304.8972   | 1.2270      | 0.1220    | 6.4643      |
| 9   | A''  | 313.5731   | 0.2758      | 3.9005    | 0.0245      |
| 10  | A''  | 349.9161   | 0.4375      | 0.2658    | 0.0537      |
| 11  | A'   | 387.3901   | 1.2875      | 3.3922    | 8.1904      |
| 12  | A''  | 392.1218   | 0.9007      | 1.1410    | 5.3716      |
| 13  | A''  | 488.9918   | 0.1576      | 2.2914    | 0.2716      |
| 14  | A'   | 570.8202   | 1.9916      | 0.0397    | 18.4982     |
| 15  | A'   | 585.8634   | 2.5146      | 7.0448    | 16.3261     |
| 16  | A'   | 624.3196   | 2.5912      | 4.2359    | 1.1705      |
| 17  | A''  | 646.8984   | 2.9397      | 0.0008    | 1.0553      |
| 18  | A''  | 650.3614   | 1.3208      | 0.0099    | 0.2659      |
| 19  | A''  | 702.0652   | 3.0107      | 100.2843  | 0.1987      |
| 20  | A'   | 713.2340   | 3.5330      | 11.5412   | 1.8156      |
| 21  | A''  | 1010.4165  | 4.2702      | 8.1391    | 1.7217      |
| 22  | A'   | 1030.5571  | 7.4774      | 176.3201  | 1.7332      |
| 23  | A'   | 1076.5362  | 5.9388      | 2.2113    | 2.9786      |



|    |     |           |         |          |          |
|----|-----|-----------|---------|----------|----------|
| 24 | A'' | 1077.3441 | 1.2823  | 113.9333 | 0.0426   |
| 25 | A'' | 1319.2732 | 6.6077  | 59.0757  | 22.3388  |
| 26 | A'  | 1336.8880 | 12.6071 | 85.7620  | 9.0023   |
| 27 | A'' | 1382.1892 | 12.3367 | 314.2293 | 3.5707   |
| 28 | A'  | 1439.2078 | 6.2666  | 16.2402  | 2.8529   |
| 29 | A'' | 1524.5898 | 12.6807 | 59.7149  | 2.8072   |
| 30 | A'  | 1551.5616 | 5.4747  | 107.0077 | 7.9726   |
| 31 | A'  | 1599.7705 | 2.4290  | 358.4767 | 7.8460   |
| 32 | A'  | 3498.0147 | 7.5319  | 66.4093  | 121.0703 |
| 33 | A'' | 3614.1372 | 8.5015  | 65.7382  | 18.9669  |

py-10\_A\_bp86

| NM# | Symm | Wavenumber | Force Const | IR Intens | Raman Activ |
|-----|------|------------|-------------|-----------|-------------|
| 1   | A''  | 88.4129    | 0.0983      | 0.0000    | 0.0200      |
| 2   | A'   | 101.6377   | 0.0744      | 0.2428    | 0.1510      |
| 3   | A'   | 194.2442   | 0.4928      | 0.3672    | 1.9793      |
| 4   | A'   | 200.5271   | 0.1637      | 2.5870    | 0.7432      |
| 5   | A'   | 233.9097   | 0.0396      | 196.4851  | 4.8978      |
| 6   | A''  | 235.7809   | 0.4996      | 0.6594    | 0.7556      |
| 7   | A'   | 295.3148   | 0.6195      | 0.5475    | 0.2882      |
| 8   | A'   | 307.7134   | 1.2345      | 0.1159    | 5.5941      |
| 9   | A''  | 310.8233   | 0.2611      | 3.8482    | 0.0176      |
| 10  | A''  | 351.0878   | 0.4339      | 0.2986    | 0.0526      |
| 11  | A'   | 393.4870   | 1.3014      | 3.3546    | 7.5421      |
| 12  | A''  | 394.9402   | 0.9424      | 1.3991    | 4.9909      |
| 13  | A''  | 491.0845   | 0.1599      | 2.6631    | 0.3322      |
| 14  | A'   | 574.4748   | 2.0670      | 0.0010    | 18.5783     |
| 15  | A'   | 592.1306   | 2.5351      | 5.8324    | 16.0363     |
| 16  | A'   | 624.8982   | 2.6015      | 3.5118    | 1.1120      |
| 17  | A''  | 648.8284   | 2.9516      | 0.0001    | 1.0008      |
| 18  | A''  | 652.2179   | 1.3394      | 0.0884    | 0.3759      |
| 19  | A'   | 709.5865   | 3.5137      | 12.0091   | 1.7181      |
| 20  | A''  | 720.1788   | 2.9147      | 91.7966   | 0.0703      |
| 21  | A''  | 1030.1797  | 3.1274      | 1.0479    | 1.4369      |
| 22  | A'   | 1044.4678  | 7.6859      | 170.6720  | 1.4717      |
| 23  | A''  | 1083.1581  | 1.4198      | 107.6243  | 0.0171      |
| 24  | A'   | 1096.1450  | 5.9374      | 0.7465    | 3.0960      |
| 25  | A''  | 1350.2933  | 7.6994      | 85.7627   | 20.9207     |
| 26  | A'   | 1363.2324  | 13.0662     | 89.6867   | 8.2289      |
| 27  | A''  | 1406.2318  | 13.3752     | 308.4187  | 4.3023      |
| 28  | A'   | 1458.7666  | 4.6006      | 7.7432    | 2.9245      |
| 29  | A''  | 1550.3204  | 13.8444     | 65.3042   | 2.9806      |
| 30  | A'   | 1558.9065  | 3.0449      | 4.8775    | 3.9139      |
| 31  | A'   | 1605.1323  | 4.6442      | 474.0171  | 10.7695     |
| 32  | A'   | 3498.4608  | 7.5349      | 64.2555   | 121.2535    |
| 33  | A''  | 3618.7397  | 8.5225      | 69.1977   | 18.4100     |

py-10\_A\_bpw91

| NM# | Symm | Wavenumber | Force Const | IR Intens | Raman Activ |
|-----|------|------------|-------------|-----------|-------------|
| 1   | A''  | 88.1098    | 0.0976      | 0.0000    | 0.0223      |
| 2   | A'   | 101.3032   | 0.0758      | 0.2870    | 0.1536      |
| 3   | A'   | 195.2334   | 0.4920      | 0.4649    | 1.9927      |
| 4   | A'   | 202.1577   | 0.1503      | 4.2661    | 0.7540      |
| 5   | A'   | 223.5654   | 0.0368      | 194.3307  | 4.5434      |
| 6   | A''  | 237.1563   | 0.5005      | 0.6759    | 0.7574      |
| 7   | A'   | 297.0297   | 0.6170      | 0.6285    | 0.2801      |
| 8   | A'   | 308.7510   | 1.2448      | 0.1088    | 5.4029      |
| 9   | A''  | 311.5729   | 0.2628      | 3.8572    | 0.0149      |
| 10  | A''  | 354.5111   | 0.4258      | 0.3037    | 0.0571      |
| 11  | A'   | 394.6662   | 1.3142      | 3.1610    | 7.2353      |
| 12  | A''  | 395.8548   | 0.9501      | 1.4267    | 4.8766      |
| 13  | A''  | 491.9171   | 0.1614      | 2.4538    | 0.3034      |
| 14  | A'   | 576.0051   | 2.0782      | 0.0006    | 18.4189     |
| 15  | A'   | 593.2076   | 2.5576      | 5.8159    | 15.7599     |
| 16  | A'   | 628.8843   | 2.6325      | 3.7844    | 1.0810      |
| 17  | A''  | 653.9867   | 2.5204      | 0.0074    | 0.8448      |
| 18  | A''  | 654.6668   | 1.4740      | 0.0734    | 0.5375      |
| 19  | A'   | 717.5028   | 3.5877      | 12.0067   | 1.7816      |
| 20  | A''  | 723.0850   | 2.9413      | 91.6113   | 0.0659      |
| 21  | A''  | 1032.5921  | 3.2381      | 1.6166    | 1.4175      |
| 22  | A'   | 1047.6119  | 7.7023      | 172.2784  | 1.3797      |
| 23  | A''  | 1085.3398  | 1.4100      | 108.4652  | 0.0179      |
| 24  | A'   | 1099.4121  | 6.0130      | 0.5536    | 3.2978      |
| 25  | A''  | 1354.8814  | 7.7556      | 81.3103   | 21.0117     |
| 26  | A'   | 1366.9118  | 13.0934     | 89.0652   | 8.1482      |
| 27  | A''  | 1409.7660  | 13.3918     | 310.8773  | 4.0903      |
| 28  | A'   | 1464.0523  | 4.7465      | 8.9972    | 2.9540      |
| 29  | A''  | 1556.5036  | 14.0647     | 67.2661   | 2.9857      |
| 30  | A'   | 1565.6667  | 3.1734      | 8.1359    | 4.5376      |
| 31  | A'   | 1611.0882  | 4.3884      | 470.0747  | 10.5168     |
| 32  | A'   | 3521.5598  | 7.6346      | 64.8022   | 118.4589    |
| 33  | A''  | 3642.2315  | 8.6340      | 68.5333   | 18.1607     |

py-10\_A\_camb3lyp

| NM# | Symm | Wavenumber | Force Const | IR Intens | Raman Activ |
|-----|------|------------|-------------|-----------|-------------|
| 1   | A''  | 96.4144    | 0.1168      | 0.0000    | 0.0174      |
| 2   | A'   | 103.7189   | 0.1109      | 9.8575    | 0.0634      |
| 3   | A'   | 152.0720   | 0.0154      | 194.4549  | 0.0272      |
| 4   | A'   | 206.1618   | 0.5679      | 0.2466    | 1.6057      |
| 5   | A'   | 213.1508   | 0.2489      | 0.0008    | 0.6595      |
| 6   | A''  | 250.9297   | 0.5937      | 0.9132    | 0.6504      |

|    |     |           |         |          |         |
|----|-----|-----------|---------|----------|---------|
| 7  | A'  | 312.7169  | 0.6790  | 0.5099   | 0.2229  |
| 8  | A'  | 327.0323  | 1.4031  | 0.4619   | 3.7662  |
| 9  | A'' | 331.7632  | 0.3041  | 3.0118   | 0.0000  |
| 10 | A'' | 371.1727  | 0.4449  | 0.0000   | 0.0085  |
| 11 | A'  | 414.5760  | 1.4996  | 1.5817   | 5.2418  |
| 12 | A'' | 417.0936  | 1.0671  | 1.9969   | 4.3942  |
| 13 | A'' | 517.8674  | 0.1780  | 0.0000   | 0.0461  |
| 14 | A'  | 609.1531  | 2.1372  | 0.0378   | 21.4714 |
| 15 | A'  | 627.8312  | 3.2228  | 3.9945   | 8.1660  |
| 16 | A'  | 681.7369  | 3.1025  | 3.5978   | 0.3374  |
| 17 | A'' | 686.8553  | 1.4450  | 0.6236   | 0.0908  |
| 18 | A'' | 712.7308  | 3.6411  | 0.0000   | 0.9949  |
| 19 | A'' | 768.8568  | 3.1001  | 73.8365  | 0.0267  |
| 20 | A'  | 791.3608  | 4.4213  | 21.1208  | 0.1107  |
| 21 | A'' | 1096.1815 | 1.9930  | 3.1913   | 0.1458  |
| 22 | A'  | 1115.1010 | 7.9440  | 172.4001 | 1.7274  |
| 23 | A'' | 1134.1438 | 2.3809  | 100.4274 | 0.4338  |
| 24 | A'  | 1166.4598 | 7.1582  | 1.8258   | 4.3086  |
| 25 | A'' | 1347.5852 | 8.0744  | 19.7122  | 34.4975 |
| 26 | A'  | 1455.9621 | 14.5202 | 97.9227  | 6.5093  |
| 27 | A'' | 1491.5105 | 13.7979 | 366.3658 | 1.0204  |
| 28 | A'  | 1523.2771 | 4.8786  | 34.3727  | 0.6543  |
| 29 | A'  | 1644.6079 | 2.7718  | 13.6851  | 2.2860  |
| 30 | A'' | 1652.1621 | 16.0851 | 120.0630 | 3.6650  |
| 31 | A'  | 1686.3454 | 8.0755  | 594.3894 | 19.8012 |
| 32 | A'  | 3634.5586 | 8.1328  | 101.7399 | 98.7584 |
| 33 | A'' | 3755.8315 | 9.1934  | 86.2051  | 17.6635 |

py-10\_A\_m062x

| NM# | Symm | Wavenumber | Force Const | IR Intens | Raman Activ |
|-----|------|------------|-------------|-----------|-------------|
| 1   | A'   | 92.4082    | 0.0174      | 95.7878   | 2.5152      |
| 2   | A''  | 97.0175    | 0.1181      | 0.0000    | 0.0255      |
| 3   | A'   | 119.6974   | 0.0132      | 111.0946  | 2.0745      |
| 4   | A'   | 206.6227   | 0.5724      | 0.1982    | 1.5751      |
| 5   | A'   | 212.2671   | 0.2284      | 0.1246    | 0.7202      |
| 6   | A''  | 251.4977   | 0.6323      | 0.7871    | 0.6721      |
| 7   | A'   | 309.8318   | 0.6691      | 0.7976    | 0.2272      |
| 8   | A'   | 327.9869   | 1.4179      | 0.5081    | 3.9891      |
| 9   | A''  | 335.9098   | 0.3251      | 2.4362    | 0.0039      |
| 10  | A''  | 365.4956   | 0.4055      | 0.1169    | 0.0219      |
| 11  | A'   | 415.3096   | 1.4737      | 1.8511    | 5.0616      |
| 12  | A''  | 417.5522   | 1.0182      | 2.0536    | 4.5240      |
| 13  | A''  | 505.4949   | 0.1721      | 0.6675    | 0.1257      |
| 14  | A'   | 607.2618   | 2.1537      | 0.0277    | 22.1304     |
| 15  | A'   | 628.8734   | 3.2055      | 3.2238    | 7.3290      |
| 16  | A'   | 669.7529   | 2.8973      | 2.5892    | 1.2908      |
| 17  | A''  | 685.0506   | 1.4633      | 0.7787    | 0.0929      |

|    |     |           |         |          |          |
|----|-----|-----------|---------|----------|----------|
| 18 | A'' | 703.5714  | 3.5410  | 0.0002   | 0.9615   |
| 19 | A'  | 769.8859  | 4.2084  | 21.6266  | 1.0644   |
| 20 | A'' | 774.8548  | 3.0343  | 69.8967  | 0.0090   |
| 21 | A'' | 1101.6774 | 1.5281  | 15.7494  | 0.0832   |
| 22 | A'  | 1119.4238 | 8.2431  | 164.5428 | 2.1681   |
| 23 | A'' | 1146.7674 | 3.5207  | 75.4704  | 0.2833   |
| 24 | A'  | 1169.6818 | 6.9051  | 0.2833   | 4.1258   |
| 25 | A'' | 1344.4851 | 8.3399  | 20.0680  | 33.4767  |
| 26 | A'  | 1473.1633 | 14.6808 | 98.6977  | 6.8865   |
| 27 | A'' | 1502.4730 | 14.0771 | 363.6582 | 0.7800   |
| 28 | A'  | 1525.7796 | 4.5413  | 35.6754  | 0.7021   |
| 29 | A'  | 1642.6655 | 2.7210  | 28.6606  | 2.2805   |
| 30 | A'' | 1655.2394 | 16.4312 | 125.2248 | 3.2807   |
| 31 | A'  | 1688.7187 | 9.6435  | 580.7016 | 20.4033  |
| 32 | A'  | 3635.1808 | 8.1370  | 113.2818 | 101.9978 |
| 33 | A'' | 3761.3593 | 9.2198  | 90.9942  | 19.0235  |

-----

py-10\_A\_mn15

| NM# | Symm | Wavenumber | Force Const | IR Intens | Raman Activ |
|-----|------|------------|-------------|-----------|-------------|
| 1   | A''  | 95.5546    | 0.1147      | 0.0000    | 0.0188      |
| 2   | A'   | 106.0863   | 0.0981      | 0.5495    | 0.0891      |
| 3   | A'   | 173.5948   | 0.0201      | 196.4969  | 0.0020      |
| 4   | A'   | 203.2939   | 0.5515      | 0.2711    | 1.5540      |
| 5   | A'   | 209.5805   | 0.2628      | 0.2281    | 0.7724      |
| 6   | A''  | 247.5125   | 0.5889      | 0.9052    | 0.6316      |
| 7   | A'   | 306.9910   | 0.6671      | 0.3978    | 0.2006      |
| 8   | A'   | 322.0953   | 1.3565      | 0.4087    | 3.9192      |
| 9   | A''  | 326.5160   | 0.2964      | 3.0284    | 0.0000      |
| 10  | A''  | 362.6747   | 0.3864      | 0.0000    | 0.0016      |
| 11  | A''  | 409.4900   | 0.9988      | 1.8000    | 4.7189      |
| 12  | A'   | 410.2015   | 1.4205      | 2.1584    | 5.0746      |
| 13  | A''  | 499.3342   | 0.1689      | 0.0000    | 0.0860      |
| 14  | A'   | 597.8191   | 2.2471      | 0.0079    | 20.3869     |
| 15  | A'   | 618.9026   | 2.8654      | 2.6382    | 10.5091     |
| 16  | A'   | 666.8868   | 2.9790      | 2.3845    | 0.4984      |
| 17  | A''  | 674.1043   | 1.3928      | 0.7533    | 0.1349      |
| 18  | A''  | 699.5131   | 3.5086      | 0.0000    | 0.8972      |
| 19  | A''  | 769.6546   | 2.9078      | 70.6000   | 0.0102      |
| 20  | A'   | 770.6965   | 4.2255      | 21.6874   | 0.0318      |
| 21  | A''  | 1081.1993  | 1.3339      | 23.0498   | 0.1611      |
| 22  | A'   | 1108.8377  | 8.0748      | 170.9282  | 2.1202      |
| 23  | A''  | 1135.8251  | 4.3937      | 68.6034   | 0.1723      |
| 24  | A'   | 1161.7124  | 6.6135      | 0.5683    | 3.9945      |
| 25  | A''  | 1355.3112  | 9.3125      | 23.6031   | 32.1573     |
| 26  | A'   | 1466.2860  | 14.1377     | 99.6204   | 5.9411      |
| 27  | A''  | 1497.1939  | 14.3479     | 382.1230  | 0.9701      |
| 28  | A'   | 1512.7245  | 3.6249      | 21.0716   | 0.3105      |

|    |     |           |         |          |          |
|----|-----|-----------|---------|----------|----------|
| 29 | A'  | 1619.9493 | 2.7998  | 67.9885  | 2.0376   |
| 30 | A'' | 1649.7711 | 16.8927 | 128.3177 | 4.0041   |
| 31 | A'  | 1679.3561 | 12.8976 | 550.2209 | 19.9773  |
| 32 | A'  | 3633.4692 | 8.1303  | 97.3651  | 105.8734 |
| 33 | A'' | 3761.1513 | 9.2152  | 83.0787  | 19.5190  |

py-10\_A\_mp2

| NM# | Symm | Wavenumber | Force Const | IR Intens | Raman Activ |
|-----|------|------------|-------------|-----------|-------------|
| 1   | A''  | 90.4716    | 0.1029      | 0.0007    | 0.0077      |
| 2   | A'   | 104.6117   | 0.0558      | 0.9903    | 0.1165      |
| 3   | A'   | 194.1916   | 0.1976      | 0.7254    | 0.7315      |
| 4   | A'   | 205.9809   | 0.4805      | 0.1924    | 1.4022      |
| 5   | A''  | 248.9657   | 0.5914      | 0.3792    | 0.5971      |
| 6   | A'   | 292.9267   | 0.6499      | 0.9766    | 0.4178      |
| 7   | A'   | 323.7124   | 1.3268      | 0.3357    | 3.2765      |
| 8   | A''  | 325.2936   | 0.3114      | 1.2330    | 0.0057      |
| 9   | A''  | 332.6709   | 0.3206      | 1.8694    | 0.2312      |
| 10  | A'   | 412.3961   | 1.5123      | 0.8188    | 5.5162      |
| 11  | A''  | 413.8137   | 0.8341      | 3.2384    | 4.1988      |
| 12  | A''  | 441.8911   | 0.1402      | 12.2732   | 1.1321      |
| 13  | A'   | 530.3115   | 0.2254      | 234.2797  | 3.8594      |
| 14  | A'   | 596.7698   | 1.6961      | 3.2324    | 31.1558     |
| 15  | A'   | 612.2674   | 3.1840      | 3.8176    | 5.7913      |
| 16  | A'   | 631.0145   | 2.4725      | 7.0525    | 0.7192      |
| 17  | A''  | 631.6882   | 2.8185      | 0.0174    | 0.8663      |
| 18  | A'   | 643.6592   | 1.9233      | 52.9448   | 1.3148      |
| 19  | A''  | 674.9675   | 1.6741      | 0.4629    | 0.1227      |
| 20  | A''  | 779.8832   | 2.9863      | 69.1987   | 0.0654      |
| 21  | A'   | 1090.0692  | 6.8594      | 146.1809  | 1.5565      |
| 22  | A''  | 1095.3347  | 5.5707      | 9.5732    | 0.1615      |
| 23  | A''  | 1161.0485  | 1.3176      | 72.2321   | 0.0613      |
| 24  | A'   | 1165.8833  | 7.4951      | 6.3460    | 6.9602      |
| 25  | A''  | 1433.0543  | 9.2816      | 69.4242   | 26.1084     |
| 26  | A'   | 1434.9262  | 14.7807     | 86.9361   | 11.1463     |
| 27  | A''  | 1479.8633  | 14.3295     | 329.4887  | 3.9616      |
| 28  | A'   | 1510.5683  | 6.6558      | 22.3934   | 6.3945      |
| 29  | A'   | 1630.7362  | 2.9436      | 9.3107    | 3.0887      |
| 30  | A''  | 1636.6646  | 14.9766     | 42.6979   | 1.9131      |
| 31  | A'   | 1680.2956  | 4.8208      | 389.6411  | 20.9353     |
| 32  | A'   | 3602.8719  | 8.0050      | 64.2394   | 132.1479    |
| 33  | A''  | 3724.5117  | 9.0039      | 56.6569   | 22.1517     |

py-10\_A\_o3lyp

| NM# | Symm | Wavenumber | Force Const | IR Intens | Raman Activ |
|-----|------|------------|-------------|-----------|-------------|
|-----|------|------------|-------------|-----------|-------------|

|    |     |           |         |          |          |
|----|-----|-----------|---------|----------|----------|
| 1  | A'' | 90.8836   | 0.1037  | 0.0000   | 0.0170   |
| 2  | A'  | 103.3493  | 0.0789  | 0.3096   | 0.1743   |
| 3  | A'  | 202.6867  | 0.3682  | 4.9340   | 2.4368   |
| 4  | A'  | 209.7293  | 0.0471  | 82.5342  | 1.6510   |
| 5  | A'  | 213.1100  | 0.0691  | 119.7392 | 3.3680   |
| 6  | A'' | 247.4041  | 0.5518  | 0.7502   | 0.7215   |
| 7  | A'  | 307.0148  | 0.6506  | 0.5719   | 0.2567   |
| 8  | A'  | 319.3882  | 1.3418  | 0.1455   | 4.8468   |
| 9  | A'' | 322.6638  | 0.2906  | 3.4964   | 0.0100   |
| 10 | A'' | 367.9297  | 0.4256  | 0.3767   | 0.0575   |
| 11 | A'  | 406.3852  | 1.3846  | 2.8326   | 5.8567   |
| 12 | A'' | 407.0428  | 0.9955  | 1.6523   | 4.4659   |
| 13 | A'' | 498.5198  | 0.1677  | 2.5323   | 0.2494   |
| 14 | A'  | 590.5352  | 2.0662  | 0.0452   | 20.0668  |
| 15 | A'  | 611.9133  | 2.9232  | 5.0643   | 11.5423  |
| 16 | A'  | 656.4297  | 2.8407  | 4.9399   | 1.1916   |
| 17 | A'' | 675.6312  | 1.4401  | 0.0570   | 0.2499   |
| 18 | A'' | 686.5414  | 3.3525  | 0.0010   | 0.9793   |
| 19 | A'' | 748.6356  | 3.1126  | 85.6506  | 0.0204   |
| 20 | A'  | 755.7165  | 3.9695  | 13.2498  | 1.5722   |
| 21 | A'' | 1072.1393 | 2.8146  | 0.0934   | 0.7451   |
| 22 | A'  | 1081.0841 | 8.0388  | 169.7637 | 1.4178   |
| 23 | A'' | 1119.0184 | 1.6425  | 102.8271 | 0.1398   |
| 24 | A'  | 1132.0146 | 6.5105  | 0.1001   | 3.7184   |
| 25 | A'' | 1378.0875 | 8.2707  | 32.0446  | 26.1720  |
| 26 | A'  | 1419.2861 | 14.0755 | 96.1871  | 8.1986   |
| 27 | A'' | 1454.9880 | 13.2899 | 359.9856 | 1.4310   |
| 28 | A'  | 1502.1585 | 5.3736  | 20.8646  | 1.7823   |
| 29 | A'' | 1610.3435 | 15.3771 | 94.0859  | 2.9032   |
| 30 | A'  | 1616.1590 | 3.5930  | 19.6211  | 5.1939   |
| 31 | A'  | 1657.4826 | 4.1037  | 492.3249 | 12.4482  |
| 32 | A'  | 3628.6142 | 8.1088  | 79.6803  | 110.6500 |
| 33 | A'' | 3752.0747 | 9.1651  | 71.8213  | 18.4714  |

py-10\_A\_pbe0

| NM# | Symm | Wavenumber | Force Const | IR Intens | Raman Activ |
|-----|------|------------|-------------|-----------|-------------|
| 1   | A'   | 91.4476    | 0.0258      | 63.9304   | 2.0504      |
| 2   | A''  | 95.0481    | 0.1135      | 0.0000    | 0.0205      |
| 3   | A'   | 130.4472   | 0.0134      | 136.1915  | 2.9160      |
| 4   | A'   | 203.9433   | 0.5526      | 0.2915    | 1.6274      |
| 5   | A'   | 212.1331   | 0.2432      | 0.0735    | 0.7257      |
| 6   | A''  | 248.1079   | 0.5517      | 0.9095    | 0.6706      |
| 7   | A'   | 310.6060   | 0.6715      | 0.7012    | 0.2419      |
| 8   | A'   | 325.7359   | 1.3879      | 0.2983    | 3.9188      |
| 9   | A''  | 326.4928   | 0.2903      | 3.2412    | 0.0011      |
| 10  | A''  | 369.5308   | 0.4524      | 0.0935    | 0.0254      |
| 11  | A''  | 414.9608   | 1.0572      | 1.9197    | 4.3359      |

|    |     |           |         |          |          |
|----|-----|-----------|---------|----------|----------|
| 12 | A'  | 415.1406  | 1.4780  | 1.9115   | 5.2329   |
| 13 | A'' | 517.8392  | 0.1776  | 0.7102   | 0.1002   |
| 14 | A'  | 604.9286  | 2.1905  | 0.0634   | 20.2837  |
| 15 | A'  | 626.4556  | 3.0849  | 3.9123   | 10.3867  |
| 16 | A'  | 670.7462  | 2.9680  | 3.9274   | 0.9868   |
| 17 | A'' | 683.1885  | 1.4403  | 0.4745   | 0.2191   |
| 18 | A'' | 700.7031  | 3.5066  | 0.0003   | 0.9807   |
| 19 | A'' | 770.3076  | 3.0891  | 74.9913  | 0.0026   |
| 20 | A'  | 771.0428  | 4.1755  | 17.5747  | 1.0148   |
| 21 | A'' | 1093.3555 | 1.7972  | 7.3638   | 0.2983   |
| 22 | A'  | 1110.6209 | 8.2898  | 168.4234 | 1.7322   |
| 23 | A'' | 1137.0733 | 2.6109  | 89.0251  | 0.1571   |
| 24 | A'  | 1164.1016 | 6.7599  | 0.2426   | 3.9884   |
| 25 | A'' | 1392.0730 | 9.2930  | 31.3576  | 27.9980  |
| 26 | A'  | 1459.9979 | 14.7525 | 102.1491 | 7.0846   |
| 27 | A'' | 1491.6618 | 14.1470 | 365.6059 | 1.1558   |
| 28 | A'  | 1528.3093 | 4.0505  | 13.4694  | 1.0966   |
| 29 | A'  | 1635.0651 | 3.0098  | 11.1182  | 2.7470   |
| 30 | A'' | 1647.1363 | 16.3132 | 110.2151 | 3.6053   |
| 31 | A'  | 1684.8473 | 8.3828  | 569.5179 | 16.2239  |
| 32 | A'  | 3640.3116 | 8.1593  | 91.0811  | 103.7276 |
| 33 | A'' | 3767.4459 | 9.2477  | 83.8592  | 17.3721  |

py-10\_A\_pbe

| NM# | Symm | Wavenumber | Force Const | IR Intens | Raman Activ |
|-----|------|------------|-------------|-----------|-------------|
| 1   | A'   | -163.3223  | 0.0214      | 169.3620  | 0.0791      |
| 2   | A''  | 88.8700    | 0.0993      | 0.0000    | 0.0197      |
| 3   | A'   | 107.3012   | 0.0366      | 9.4187    | 0.1304      |
| 4   | A'   | 195.5865   | 0.5068      | 0.3380    | 1.8447      |
| 5   | A'   | 201.0841   | 0.1983      | 0.5840    | 0.7787      |
| 6   | A''  | 237.3159   | 0.5045      | 0.6814    | 0.7918      |
| 7   | A'   | 296.3812   | 0.5887      | 1.1644    | 0.2273      |
| 8   | A'   | 309.2353   | 1.2563      | 0.1122    | 5.2969      |
| 9   | A''  | 312.4135   | 0.2629      | 3.9007    | 0.0003      |
| 10  | A''  | 353.0695   | 0.4460      | 0.0000    | 0.0203      |
| 11  | A'   | 395.3095   | 1.3688      | 2.0363    | 6.7104      |
| 12  | A''  | 396.5694   | 0.9617      | 1.5217    | 5.0765      |
| 13  | A''  | 506.9562   | 0.1674      | 0.0000    | 0.0369      |
| 14  | A'   | 577.3105   | 2.1364      | 0.0003    | 17.2562     |
| 15  | A'   | 594.3534   | 2.5591      | 4.9361    | 17.2973     |
| 16  | A'   | 629.5251   | 2.5462      | 4.7622    | 0.2815      |
| 17  | A''  | 652.8371   | 1.3063      | 0.2656    | 0.3427      |
| 18  | A''  | 653.8003   | 3.0253      | 0.0000    | 1.1558      |
| 19  | A'   | 717.3129   | 3.5402      | 11.2111   | 0.1255      |
| 20  | A''  | 725.8268   | 2.9301      | 86.1755   | 0.0696      |
| 21  | A''  | 1033.6415  | 2.5068      | 0.0144    | 1.2265      |
| 22  | A'   | 1051.0436  | 7.8203      | 170.9061  | 1.2777      |

|    |     |           |         |          |          |
|----|-----|-----------|---------|----------|----------|
| 23 | A'' | 1079.8467 | 1.5967  | 110.6765 | 0.0548   |
| 24 | A'  | 1105.0119 | 5.9654  | 0.6081   | 3.4526   |
| 25 | A'' | 1361.6028 | 8.2641  | 101.1032 | 20.1284  |
| 26 | A'  | 1371.8216 | 13.1097 | 90.1625  | 8.5614   |
| 27 | A'' | 1415.6774 | 13.8028 | 295.9327 | 4.9951   |
| 28 | A'  | 1469.3723 | 3.9357  | 4.7784   | 3.2210   |
| 29 | A'' | 1561.5557 | 14.5238 | 71.4698  | 2.5840   |
| 30 | A'  | 1563.6726 | 2.9907  | 0.0406   | 3.8915   |
| 31 | A'  | 1613.8029 | 5.8960  | 499.7099 | 10.8470  |
| 32 | A'  | 3524.3006 | 7.6439  | 76.5144  | 116.4706 |
| 33 | A'' | 3648.3207 | 8.6704  | 76.8690  | 17.2853  |

-----

py-10\_A\_rtpss

| NM# | Symm | Wavenumber | Force Const | IR Intens | Raman Activ |
|-----|------|------------|-------------|-----------|-------------|
| 1   | A''  | 90.9980    | 0.1041      | 0.0000    | 0.0151      |
| 2   | A'   | 105.4492   | 0.0638      | 0.7821    | 0.1063      |
| 3   | A'   | 193.1621   | 0.4954      | 0.2351    | 1.7999      |
| 4   | A'   | 202.7404   | 0.1978      | 0.8279    | 0.6967      |
| 5   | A''  | 234.3638   | 0.5030      | 0.6430    | 0.7207      |
| 6   | A'   | 298.0240   | 0.5706      | 2.0587    | 0.2947      |
| 7   | A'   | 308.4005   | 1.2372      | 0.4109    | 4.8161      |
| 8   | A''  | 310.8255   | 0.2669      | 3.3470    | 0.0296      |
| 9   | A'   | 341.4379   | 0.0893      | 219.9682  | 2.2107      |
| 10  | A''  | 353.2084   | 0.4064      | 0.8095    | 0.0841      |
| 11  | A''  | 397.9515   | 0.9348      | 1.4671    | 4.8750      |
| 12  | A'   | 398.4341   | 0.9243      | 14.6671   | 8.6307      |
| 13  | A''  | 482.5549   | 0.1586      | 5.7431    | 0.6054      |
| 14  | A'   | 578.0395   | 2.0787      | 0.0104    | 19.4937     |
| 15  | A'   | 599.0549   | 2.4871      | 7.4385    | 14.2333     |
| 16  | A'   | 626.9766   | 2.6484      | 2.9896    | 0.6307      |
| 17  | A''  | 653.3785   | 2.4147      | 0.0132    | 0.7433      |
| 18  | A''  | 654.1262   | 1.6242      | 0.1116    | 0.4691      |
| 19  | A'   | 710.6084   | 3.5333      | 12.6109   | 1.1215      |
| 20  | A''  | 729.5088   | 2.8823      | 92.8422   | 0.0546      |
| 21  | A''  | 1042.8260  | 3.9506      | 4.2819    | 1.2334      |
| 22  | A'   | 1054.9368  | 7.6692      | 169.6311  | 1.5295      |
| 23  | A'   | 1108.3092  | 6.1512      | 0.3518    | 3.2538      |
| 24  | A''  | 1111.8118  | 1.3652      | 97.3516   | 0.0075      |
| 25  | A''  | 1365.8983  | 7.6203      | 91.1171   | 20.5413     |
| 26  | A'   | 1377.9984  | 13.4291     | 86.6918   | 7.5830      |
| 27  | A''  | 1425.9228  | 13.6894     | 315.7242  | 4.2807      |
| 28  | A'   | 1476.5864  | 6.0344      | 17.3276   | 2.1355      |
| 29  | A''  | 1570.6684  | 13.3784     | 53.2686   | 3.4531      |
| 30  | A'   | 1594.1626  | 3.9124      | 45.7346   | 5.4612      |
| 31  | A'   | 1637.2660  | 3.2924      | 411.5427  | 10.7481     |
| 32  | A'   | 3508.9480  | 7.5844      | 48.9948   | 124.2447    |
| 33  | A''  | 3626.1170  | 8.5470      | 53.5007   | 22.9403     |



py-10\_A\_tpssh

| NM# | Symm | Wavenumber | Force Const | IR Intens | Raman Activ |
|-----|------|------------|-------------|-----------|-------------|
| 1   | A''  | 92.9404    | 0.1085      | 0.0000    | 0.0169      |
| 2   | A'   | 105.6609   | 0.0800      | 0.2839    | 0.1434      |
| 3   | A'   | 196.2479   | 0.5036      | 0.3924    | 1.8521      |
| 4   | A'   | 208.3941   | 0.1821      | 2.0377    | 0.6878      |
| 5   | A'   | 234.2583   | 0.0397      | 211.6173  | 4.4768      |
| 6   | A''  | 238.6535   | 0.4976      | 0.8713    | 0.7057      |
| 7   | A'   | 305.2388   | 0.6522      | 0.6565    | 0.2846      |
| 8   | A'   | 314.8899   | 1.2902      | 0.1725    | 4.7246      |
| 9   | A''  | 315.1226   | 0.2712      | 3.4144    | 0.0142      |
| 10  | A''  | 363.8370   | 0.4430      | 0.3975    | 0.0574      |
| 11  | A'   | 404.2363   | 1.3621      | 3.4149    | 6.7976      |
| 12  | A''  | 405.2564   | 1.0032      | 1.4487    | 4.6649      |
| 13  | A''  | 502.6329   | 0.1690      | 3.0324    | 0.3407      |
| 14  | A'   | 588.9385   | 2.0886      | 0.0196    | 20.5346     |
| 15  | A'   | 610.6790   | 2.8172      | 5.4868    | 11.8556     |
| 16  | A'   | 649.6585   | 2.7788      | 4.2415    | 1.1830      |
| 17  | A''  | 666.9288   | 1.4229      | 0.1612    | 0.2946      |
| 18  | A''  | 676.7629   | 3.2485      | 0.0019    | 0.8747      |
| 19  | A'   | 742.4723   | 3.8408      | 14.2480   | 1.7079      |
| 20  | A''  | 742.6033   | 3.0144      | 87.4523   | 0.0387      |
| 21  | A''  | 1064.4158  | 3.0881      | 0.4628    | 0.8551      |
| 22  | A'   | 1076.9914  | 7.9629      | 174.5992  | 1.7060      |
| 23  | A''  | 1119.3267  | 1.5770      | 102.3928  | 0.0734      |
| 24  | A'   | 1127.9867  | 6.4396      | 0.1584    | 3.4492      |
| 25  | A''  | 1370.6842  | 8.1066      | 51.1987   | 24.3025     |
| 26  | A'   | 1408.4628  | 14.0020     | 93.4672   | 7.3403      |
| 27  | A''  | 1450.1524  | 13.5202     | 351.8264  | 2.2855      |
| 28  | A'   | 1497.4512  | 5.7317      | 21.0541   | 1.5906      |
| 29  | A''  | 1598.9426  | 14.3986     | 75.6250   | 3.3958      |
| 30  | A'   | 1615.9799  | 3.8379      | 32.8778   | 5.3260      |
| 31  | A'   | 1656.7780  | 3.6779      | 480.8725  | 12.1027     |
| 32  | A'   | 3576.8857  | 7.8790      | 69.5334   | 114.0964    |
| 33  | A''  | 3699.7928  | 8.9100      | 67.8246   | 20.3411     |

py-10\_A\_wb97xd

| NM# | Symm | Wavenumber | Force Const | IR Intens | Raman Activ |
|-----|------|------------|-------------|-----------|-------------|
| 1   | A'   | 70.3152    | 0.0063      | 139.5768  | 0.0052      |
| 2   | A''  | 95.0204    | 0.1133      | 0.0000    | 0.0196      |
| 3   | A'   | 117.4818   | 0.0175      | 66.1984   | 0.0818      |
| 4   | A'   | 204.1921   | 0.5546      | 0.3073    | 1.6305      |
| 5   | A'   | 213.3939   | 0.2280      | 0.2878    | 0.6695      |

|    |     |           |         |          |         |
|----|-----|-----------|---------|----------|---------|
| 6  | A'' | 249.4560  | 0.5564  | 0.9935   | 0.6781  |
| 7  | A'  | 310.3686  | 0.6584  | 0.7725   | 0.2249  |
| 8  | A'  | 326.1798  | 1.4091  | 0.3577   | 3.9942  |
| 9  | A'' | 327.1038  | 0.2931  | 3.0610   | 0.0001  |
| 10 | A'' | 368.7549  | 0.4201  | 0.0000   | 0.0102  |
| 11 | A'  | 414.0626  | 1.4882  | 1.6433   | 4.9509  |
| 12 | A'' | 415.2506  | 1.0587  | 1.9162   | 4.3650  |
| 13 | A'' | 511.3845  | 0.1752  | 0.0000   | 0.0654  |
| 14 | A'  | 604.2947  | 2.1081  | 0.0350   | 21.6063 |
| 15 | A'  | 625.9633  | 3.1967  | 4.0612   | 8.1436  |
| 16 | A'  | 675.8464  | 2.9848  | 3.2743   | 0.2638  |
| 17 | A'' | 685.0476  | 1.4108  | 0.2854   | 0.1107  |
| 18 | A'' | 707.9449  | 3.5865  | 0.0000   | 1.0352  |
| 19 | A'' | 765.2554  | 3.1716  | 74.9152  | 0.0191  |
| 20 | A'  | 777.8255  | 4.2609  | 21.0946  | 0.1637  |
| 21 | A'' | 1091.6653 | 1.7895  | 6.3166   | 0.1561  |
| 22 | A'  | 1110.4689 | 8.1298  | 171.4313 | 1.9658  |
| 23 | A'' | 1131.6936 | 2.6750  | 94.6239  | 0.3891  |
| 24 | A'  | 1160.3863 | 6.8994  | 0.3792   | 4.1816  |
| 25 | A'' | 1355.9186 | 8.4470  | 20.6970  | 33.6992 |
| 26 | A'  | 1452.2734 | 14.4068 | 100.3149 | 6.4942  |
| 27 | A'' | 1488.5620 | 13.8499 | 368.5849 | 1.0751  |
| 28 | A'  | 1522.5404 | 4.5559  | 28.9898  | 0.5536  |
| 29 | A'  | 1639.5982 | 2.8248  | 14.0448  | 2.4105  |
| 30 | A'' | 1650.8114 | 16.2827 | 122.4565 | 3.3328  |
| 31 | A'  | 1684.9020 | 8.2794  | 595.0225 | 18.2769 |
| 32 | A'  | 3650.0352 | 8.2048  | 91.8812  | 97.7479 |
| 33 | A'' | 3775.9572 | 9.2901  | 80.7954  | 17.4219 |

-----

py-10\_A\_x3lyp

| NM# | Symm | Wavenumber | Force Const | IR Intens | Raman Activ |
|-----|------|------------|-------------|-----------|-------------|
| 1   | A'   | 81.5820    | 0.0130      | 93.6380   | 2.1017      |
| 2   | A''  | 94.0745    | 0.1112      | 0.0000    | 0.0241      |
| 3   | A'   | 123.1140   | 0.0142      | 103.4307  | 1.6434      |
| 4   | A'   | 202.6202   | 0.5477      | 0.2709    | 1.7570      |
| 5   | A'   | 210.3017   | 0.2298      | 0.0849    | 0.7241      |
| 6   | A''  | 246.8243   | 0.5707      | 0.7998    | 0.7308      |
| 7   | A'   | 308.0823   | 0.6468      | 0.7845    | 0.2420      |
| 8   | A'   | 320.5847   | 1.3661      | 0.2691    | 4.7279      |
| 9   | A''  | 326.3064   | 0.2971      | 3.3129    | 0.0031      |
| 10  | A''  | 365.3514   | 0.4538      | 0.0560    | 0.0245      |
| 11  | A'   | 406.7947   | 1.4515      | 1.9782    | 5.8798      |
| 12  | A''  | 410.1959   | 1.0114      | 1.5901    | 4.6734      |
| 13  | A''  | 512.0141   | 0.1725      | 0.4291    | 0.0684      |
| 14  | A'   | 596.7573   | 2.0584      | 0.0205    | 21.3921     |
| 15  | A'   | 616.5913   | 3.0613      | 4.8739    | 10.2002     |
| 16  | A'   | 664.5302   | 2.9038      | 4.3224    | 0.9535      |

|    |     |           |         |          |          |
|----|-----|-----------|---------|----------|----------|
| 17 | A'' | 677.5081  | 1.4022  | 0.1392   | 0.1668   |
| 18 | A'' | 691.8913  | 3.4155  | 0.0002   | 1.0839   |
| 19 | A'' | 746.1697  | 3.1748  | 84.1090  | 0.0559   |
| 20 | A'  | 764.5499  | 4.0931  | 16.9036  | 0.9931   |
| 21 | A'' | 1073.0241 | 2.6442  | 0.0091   | 0.5405   |
| 22 | A'  | 1089.4003 | 8.0608  | 176.8277 | 1.8526   |
| 23 | A'' | 1118.9392 | 1.7621  | 107.9551 | 0.2611   |
| 24 | A'  | 1135.6333 | 6.6437  | 0.0696   | 3.5052   |
| 25 | A'' | 1353.3061 | 7.8691  | 27.5140  | 27.8220  |
| 26 | A'  | 1420.9606 | 14.1528 | 96.4270  | 7.5623   |
| 27 | A'' | 1458.5766 | 13.0954 | 353.1911 | 1.2906   |
| 28 | A'  | 1501.1126 | 5.6105  | 26.9377  | 1.1990   |
| 29 | A'' | 1609.7954 | 14.9369 | 98.8211  | 3.3683   |
| 30 | A'  | 1622.7036 | 3.7705  | 24.5836  | 5.6558   |
| 31 | A'  | 1659.7638 | 3.8602  | 530.9038 | 13.8407  |
| 32 | A'  | 3612.2561 | 8.0330  | 89.8323  | 105.4938 |
| 33 | A'' | 3734.1655 | 9.0845  | 79.1740  | 18.0415  |

-----

py-10\_B\_b3lyp

| NM# | Symm | Wavenumber | Force Const | IR Intens | Raman Activ |
|-----|------|------------|-------------|-----------|-------------|
| 1   | A    | 93.4857    | 0.1098      | 0.0000    | 0.0226      |
| 2   | A    | 98.6700    | 0.0871      | 16.5556   | 0.8618      |
| 3   | A    | 147.5220   | 0.0147      | 183.0371  | 4.7916      |
| 4   | A    | 204.1916   | 0.5566      | 0.2964    | 1.7412      |
| 5   | A    | 209.0240   | 0.2433      | 0.0048    | 0.7439      |
| 6   | A    | 247.9885   | 0.5889      | 0.7532    | 0.7140      |
| 7   | A    | 306.7918   | 0.6513      | 0.6520    | 0.2595      |
| 8   | A    | 321.3928   | 1.3630      | 0.2695    | 4.5234      |
| 9   | A    | 327.9412   | 0.2999      | 3.3148    | 0.0053      |
| 10  | A    | 363.7721   | 0.4547      | 0.1240    | 0.0319      |
| 11  | A    | 407.3376   | 1.4512      | 2.0982    | 6.1548      |
| 12  | A    | 410.3759   | 1.0057      | 1.6097    | 4.6646      |
| 13  | A    | 509.5304   | 0.1708      | 0.9763    | 0.1171      |
| 14  | A    | 598.3072   | 2.0928      | 0.0116    | 20.8120     |
| 15  | A    | 617.6277   | 3.0252      | 5.2984    | 10.9316     |
| 16  | A    | 660.7587   | 2.8927      | 4.1016    | 1.2975      |
| 17  | A    | 677.5488   | 1.4220      | 0.2059    | 0.1901      |
| 18  | A    | 688.0299   | 3.3750      | 0.0005    | 1.0289      |
| 19  | A    | 746.7837   | 3.1388      | 85.8776   | 0.0463      |
| 20  | A    | 760.6064   | 4.0581      | 16.6518   | 1.5379      |
| 21  | A    | 1071.5842  | 2.8660      | 0.0982    | 0.6062      |
| 22  | A    | 1088.1737  | 8.0092      | 176.8119  | 1.7912      |
| 23  | A    | 1118.7402  | 1.6726      | 108.0801  | 0.2109      |
| 24  | A    | 1136.2175  | 6.6608      | 0.0109    | 3.5248      |
| 25  | A    | 1353.4151  | 7.8306      | 29.2421   | 27.2424     |
| 26  | A    | 1422.5889  | 14.3209     | 98.8971   | 7.5448      |
| 27  | A    | 1455.7431  | 13.0731     | 354.6165  | 1.3547      |

|    |   |           |         |          |          |
|----|---|-----------|---------|----------|----------|
| 28 | A | 1501.6098 | 5.5704  | 22.1786  | 1.3569   |
| 29 | A | 1605.5824 | 14.6894 | 92.5609  | 3.6240   |
| 30 | A | 1619.2919 | 3.9426  | 32.4732  | 5.9492   |
| 31 | A | 1657.4325 | 3.6825  | 514.1016 | 13.1323  |
| 32 | A | 3608.0523 | 8.0141  | 85.7967  | 106.0652 |
| 33 | A | 3729.7631 | 9.0619  | 77.4429  | 17.9646  |

py-10\_B\_m062x

| NM# | Symm | Wavenumber | Force Const | IR Intens | Raman Activ |
|-----|------|------------|-------------|-----------|-------------|
| 1   | A    | 92.4077    | 0.0174      | 95.7915   | 2.5153      |
| 2   | A    | 97.0175    | 0.1181      | 0.0000    | 0.0255      |
| 3   | A    | 119.6970   | 0.0132      | 111.0909  | 2.0744      |
| 4   | A    | 206.6227   | 0.5724      | 0.1982    | 1.5751      |
| 5   | A    | 212.2671   | 0.2284      | 0.1246    | 0.7202      |
| 6   | A    | 251.4977   | 0.6323      | 0.7871    | 0.6721      |
| 7   | A    | 309.8318   | 0.6691      | 0.7976    | 0.2272      |
| 8   | A    | 327.9869   | 1.4179      | 0.5081    | 3.9891      |
| 9   | A    | 335.9098   | 0.3251      | 2.4362    | 0.0039      |
| 10  | A    | 365.4956   | 0.4055      | 0.1169    | 0.0219      |
| 11  | A    | 415.3096   | 1.4737      | 1.8511    | 5.0616      |
| 12  | A    | 417.5522   | 1.0182      | 2.0536    | 4.5240      |
| 13  | A    | 505.4950   | 0.1721      | 0.6675    | 0.1257      |
| 14  | A    | 607.2619   | 2.1537      | 0.0277    | 22.1304     |
| 15  | A    | 628.8734   | 3.2055      | 3.2238    | 7.3290      |
| 16  | A    | 669.7529   | 2.8973      | 2.5892    | 1.2908      |
| 17  | A    | 685.0506   | 1.4633      | 0.7787    | 0.0929      |
| 18  | A    | 703.5714   | 3.5410      | 0.0002    | 0.9615      |
| 19  | A    | 769.8860   | 4.2084      | 21.6266   | 1.0644      |
| 20  | A    | 774.8547   | 3.0343      | 69.8967   | 0.0090      |
| 21  | A    | 1101.6773  | 1.5281      | 15.7494   | 0.0832      |
| 22  | A    | 1119.4238  | 8.2431      | 164.5428  | 2.1681      |
| 23  | A    | 1146.7674  | 3.5207      | 75.4705   | 0.2833      |
| 24  | A    | 1169.6817  | 6.9051      | 0.2833    | 4.1258      |
| 25  | A    | 1344.4850  | 8.3399      | 20.0681   | 33.4767     |
| 26  | A    | 1473.1632  | 14.6808     | 98.6978   | 6.8865      |
| 27  | A    | 1502.4730  | 14.0771     | 363.6581  | 0.7800      |
| 28  | A    | 1525.7796  | 4.5413      | 35.6753   | 0.7021      |
| 29  | A    | 1642.6655  | 2.7210      | 28.6610   | 2.2805      |
| 30  | A    | 1655.2392  | 16.4311     | 125.2248  | 3.2807      |
| 31  | A    | 1688.7187  | 9.6435      | 580.7014  | 20.4033     |
| 32  | A    | 3635.1808  | 8.1370      | 113.2818  | 101.9978    |
| 33  | A    | 3761.3593  | 9.2198      | 90.9942   | 19.0235     |

py-10\_B\_mp2

| NM# | Symm | Wavenumber | Force Const | IR Intens | Raman Activ |
|-----|------|------------|-------------|-----------|-------------|
|-----|------|------------|-------------|-----------|-------------|

|    |   |           |         |          |          |
|----|---|-----------|---------|----------|----------|
| 1  | A | 90.4723   | 0.1029  | 0.0007   | 0.0077   |
| 2  | A | 104.5981  | 0.0558  | 0.9904   | 0.1165   |
| 3  | A | 194.1998  | 0.1976  | 0.7247   | 0.7317   |
| 4  | A | 205.9848  | 0.4804  | 0.1925   | 1.4019   |
| 5  | A | 248.9661  | 0.5913  | 0.3791   | 0.5971   |
| 6  | A | 292.9306  | 0.6499  | 0.9762   | 0.4178   |
| 7  | A | 323.7103  | 1.3267  | 0.3356   | 3.2766   |
| 8  | A | 325.2912  | 0.3115  | 1.2323   | 0.0057   |
| 9  | A | 332.5585  | 0.3207  | 1.8656   | 0.2309   |
| 10 | A | 412.3913  | 1.5122  | 0.8189   | 5.5147   |
| 11 | A | 413.8096  | 0.8339  | 3.2392   | 4.1987   |
| 12 | A | 441.8901  | 0.1402  | 12.2775  | 1.1325   |
| 13 | A | 530.3189  | 0.2254  | 234.2727 | 3.8594   |
| 14 | A | 596.7649  | 1.6962  | 3.2315   | 31.1574  |
| 15 | A | 612.2636  | 3.1837  | 3.8158   | 5.7943   |
| 16 | A | 631.0102  | 2.4694  | 7.1014   | 0.7189   |
| 17 | A | 631.6762  | 2.8183  | 0.0175   | 0.8663   |
| 18 | A | 643.6741  | 1.9250  | 52.9016  | 1.3169   |
| 19 | A | 674.9506  | 1.6740  | 0.4634   | 0.1228   |
| 20 | A | 779.8823  | 2.9863  | 69.1988  | 0.0653   |
| 21 | A | 1090.0725 | 6.8599  | 146.1807 | 1.5570   |
| 22 | A | 1095.3175 | 5.5713  | 9.5714   | 0.1615   |
| 23 | A | 1161.0510 | 1.3176  | 72.2298  | 0.0613   |
| 24 | A | 1165.8544 | 7.4942  | 6.3381   | 6.9585   |
| 25 | A | 1433.0583 | 9.2811  | 69.4634  | 26.1040  |
| 26 | A | 1434.9313 | 14.7807 | 86.9278  | 11.1474  |
| 27 | A | 1479.8481 | 14.3295 | 329.4322 | 3.9644   |
| 28 | A | 1510.5743 | 6.6555  | 22.3965  | 6.3931   |
| 29 | A | 1630.7412 | 2.9434  | 9.3035   | 3.0877   |
| 30 | A | 1636.6633 | 14.9767 | 42.7075  | 1.9134   |
| 31 | A | 1680.2993 | 4.8215  | 389.6503 | 20.9371  |
| 32 | A | 3602.8636 | 8.0050  | 64.2412  | 132.1477 |
| 33 | A | 3724.5032 | 9.0038  | 56.6581  | 22.1520  |

py-14\_A\_b3lyp

| NM# | Symm | Wavenumber | Force Const | IR Intens | Raman Activ |
|-----|------|------------|-------------|-----------|-------------|
| 1   | A    | 119.8740   | 0.1546      | 0.0708    | 0.0004      |
| 2   | A    | 157.9994   | 0.1886      | 0.3204    | 0.0230      |
| 3   | A    | 210.2776   | 0.3123      | 1.3666    | 0.1352      |
| 4   | A    | 277.2948   | 0.7462      | 2.5513    | 0.2970      |
| 5   | A    | 279.3700   | 0.4337      | 3.5099    | 0.3083      |
| 6   | A    | 318.4389   | 0.6264      | 2.8748    | 0.1725      |
| 7   | A    | 344.0979   | 0.7242      | 0.0001    | 0.7020      |
| 8   | A    | 347.2793   | 1.1552      | 2.0846    | 0.3342      |
| 9   | A    | 419.9512   | 0.2144      | 61.8404   | 2.8227      |
| 10  | A    | 446.0693   | 0.2381      | 66.4548   | 0.7232      |

|    |   |           |         |          |         |
|----|---|-----------|---------|----------|---------|
| 11 | A | 463.0497  | 1.9826  | 0.2393   | 4.8595  |
| 12 | A | 486.2226  | 1.9819  | 0.5526   | 6.1067  |
| 13 | A | 604.9591  | 2.9581  | 0.7009   | 18.5167 |
| 14 | A | 637.2332  | 2.8558  | 4.5729   | 0.3703  |
| 15 | A | 677.7551  | 3.2543  | 0.0315   | 0.0184  |
| 16 | A | 697.1424  | 4.3952  | 5.0383   | 11.4094 |
| 17 | A | 725.0670  | 3.7559  | 6.4416   | 0.3259  |
| 18 | A | 736.4757  | 3.1153  | 6.0428   | 0.1937  |
| 19 | A | 952.9017  | 3.7321  | 211.1496 | 0.2551  |
| 20 | A | 1101.9707 | 9.5440  | 283.8020 | 0.0711  |
| 21 | A | 1144.7852 | 6.7650  | 20.2286  | 1.8474  |
| 22 | A | 1271.2148 | 1.9532  | 87.9964  | 0.5473  |
| 23 | A | 1290.9080 | 7.6166  | 67.1977  | 3.2523  |
| 24 | A | 1373.2118 | 4.5336  | 35.5618  | 8.7457  |
| 25 | A | 1437.4584 | 15.0832 | 26.0988  | 3.8888  |
| 26 | A | 1503.5846 | 15.8528 | 640.6636 | 1.8508  |
| 27 | A | 1541.6953 | 14.4141 | 155.3435 | 1.8406  |
| 28 | A | 1663.3605 | 17.4090 | 123.9842 | 8.1941  |
| 29 | A | 1670.0679 | 15.1917 | 60.5198  | 3.5055  |
| 30 | A | 3790.5341 | 9.0248  | 139.7154 | 69.9129 |

py-14\_A\_b3p86

| NM# | Symm | Wavenumber | Force Const | IR Intens | Raman Activ |
|-----|------|------------|-------------|-----------|-------------|
| 1   | A    | 120.1705   | 0.1552      | 0.0730    | 0.0002      |
| 2   | A    | 158.8948   | 0.1900      | 0.2854    | 0.0236      |
| 3   | A    | 212.1551   | 0.3183      | 1.0380    | 0.1360      |
| 4   | A    | 274.4295   | 0.5268      | 5.2218    | 0.1909      |
| 5   | A    | 275.5202   | 0.5247      | 1.1822    | 0.3729      |
| 6   | A    | 319.1114   | 0.6384      | 2.8433    | 0.1632      |
| 7   | A    | 346.5461   | 0.7327      | 0.0032    | 0.6749      |
| 8   | A    | 349.8269   | 1.1715      | 2.0508    | 0.3346      |
| 9   | A    | 425.3858   | 0.2446      | 53.8705   | 2.8372      |
| 10  | A    | 452.0266   | 0.2226      | 73.5918   | 0.5972      |
| 11  | A    | 463.1293   | 1.9715      | 0.2314    | 4.7541      |
| 12  | A    | 485.0791   | 1.9645      | 0.6679    | 5.8573      |
| 13  | A    | 609.0520   | 2.9926      | 0.6308    | 17.6464     |
| 14  | A    | 638.3960   | 2.8606      | 3.8889    | 0.2976      |
| 15  | A    | 677.9963   | 3.2523      | 0.0500    | 0.0216      |
| 16  | A    | 701.3511   | 4.4400      | 3.8645    | 11.8440     |
| 17  | A    | 719.0313   | 3.7055      | 6.7124    | 0.3393      |
| 18  | A    | 740.8781   | 3.1247      | 6.0757    | 0.2026      |
| 19  | A    | 966.6779   | 3.6528      | 201.0802  | 0.2447      |
| 20  | A    | 1117.8339  | 9.8351      | 278.3135  | 0.0728      |
| 21  | A    | 1165.5105  | 6.2542      | 24.8821   | 1.5750      |
| 22  | A    | 1281.7069  | 1.7363      | 106.7863  | 0.7917      |
| 23  | A    | 1308.3177  | 9.6016      | 52.0755   | 2.8698      |
| 24  | A    | 1401.1171  | 6.2499      | 21.1814   | 8.7067      |

|    |   |           |         |          |         |
|----|---|-----------|---------|----------|---------|
| 25 | A | 1457.9415 | 15.5879 | 27.0573  | 3.7806  |
| 26 | A | 1527.9868 | 16.5795 | 663.3862 | 1.7648  |
| 27 | A | 1566.4765 | 15.2571 | 164.6047 | 1.8778  |
| 28 | A | 1686.5963 | 18.7107 | 135.3834 | 8.0048  |
| 29 | A | 1692.6674 | 15.9780 | 51.0033  | 3.2248  |
| 30 | A | 3815.6677 | 9.1447  | 143.4644 | 67.3934 |

py-14\_A\_b3pw91

| NM# | Symm | Wavenumber | Force Const | IR Intens | Raman Activ |
|-----|------|------------|-------------|-----------|-------------|
| 1   | A    | 119.6042   | 0.1538      | 0.0705    | 0.0003      |
| 2   | A    | 158.1224   | 0.1877      | 0.2930    | 0.0236      |
| 3   | A    | 212.5524   | 0.3203      | 1.0413    | 0.1368      |
| 4   | A    | 275.4632   | 0.6415      | 3.7989    | 0.2276      |
| 5   | A    | 276.9713   | 0.4555      | 2.4873    | 0.3342      |
| 6   | A    | 319.3808   | 0.6388      | 2.8128    | 0.1654      |
| 7   | A    | 346.5892   | 0.7284      | 0.0044    | 0.6774      |
| 8   | A    | 349.5277   | 1.1699      | 2.0127    | 0.3403      |
| 9   | A    | 424.2083   | 0.2151      | 62.6597   | 2.7697      |
| 10  | A    | 450.6355   | 0.2477      | 64.3390   | 0.7018      |
| 11  | A    | 462.1343   | 1.9636      | 0.2338    | 4.7595      |
| 12  | A    | 483.9037   | 1.9551      | 0.6464    | 5.8885      |
| 13  | A    | 607.2263   | 2.9768      | 0.6428    | 17.8006     |
| 14  | A    | 638.9001   | 2.8678      | 4.0693    | 0.3222      |
| 15  | A    | 679.1406   | 3.2642      | 0.0349    | 0.0191      |
| 16  | A    | 699.3664   | 4.4172      | 4.0171    | 11.7596     |
| 17  | A    | 721.4223   | 3.7271      | 6.5040    | 0.3245      |
| 18  | A    | 740.2752   | 3.1247      | 6.0246    | 0.2025      |
| 19  | A    | 963.5162   | 3.6690      | 203.0715  | 0.2473      |
| 20  | A    | 1113.7056  | 9.7619      | 279.0808  | 0.0699      |
| 21  | A    | 1160.3888  | 6.3887      | 23.4848   | 1.6325      |
| 22  | A    | 1279.4397  | 1.7582      | 102.7438  | 0.7303      |
| 23  | A    | 1303.4244  | 8.9886      | 56.0654   | 2.9293      |
| 24  | A    | 1396.2846  | 5.9849      | 23.4211   | 8.8571      |
| 25  | A    | 1452.8794  | 15.4621     | 25.9022   | 3.8892      |
| 26  | A    | 1522.7973  | 16.4096     | 657.8684  | 1.7359      |
| 27  | A    | 1560.8990  | 14.9989     | 164.4997  | 1.8539      |
| 28  | A    | 1681.6535  | 18.6837     | 138.1751  | 8.0818      |
| 29  | A    | 1687.9522  | 15.7446     | 47.6829   | 3.1854      |
| 30  | A    | 3816.6556  | 9.1497      | 141.2704  | 67.7349     |

py-14\_A\_blyp

| NM# | Symm | Wavenumber | Force Const | IR Intens | Raman Activ |
|-----|------|------------|-------------|-----------|-------------|
| 1   | A    | 112.5253   | 0.1364      | 0.0639    | 0.0007      |
| 2   | A    | 150.3806   | 0.1725      | 0.3405    | 0.0266      |

|    |   |           |         |          |         |
|----|---|-----------|---------|----------|---------|
| 3  | A | 199.8397  | 0.2855  | 1.2066   | 0.1556  |
| 4  | A | 267.0406  | 0.6806  | 2.7230   | 0.3891  |
| 5  | A | 270.4627  | 0.4138  | 3.2370   | 0.3719  |
| 6  | A | 305.9839  | 0.5754  | 2.8287   | 0.2108  |
| 7  | A | 328.9355  | 0.7131  | 0.0341   | 0.7123  |
| 8  | A | 331.8711  | 1.0562  | 1.7132   | 0.4322  |
| 9  | A | 405.5544  | 0.3696  | 24.9291  | 3.0124  |
| 10 | A | 440.2334  | 0.1581  | 93.3296  | 0.5931  |
| 11 | A | 444.3800  | 1.8352  | 0.2588   | 5.3628  |
| 12 | A | 466.0643  | 1.8429  | 0.5962   | 7.7227  |
| 13 | A | 576.4081  | 2.6871  | 1.0440   | 20.8151 |
| 14 | A | 603.5724  | 2.5437  | 5.0315   | 0.3571  |
| 15 | A | 638.7960  | 2.8731  | 0.0211   | 0.0329  |
| 16 | A | 662.8889  | 3.9850  | 5.7353   | 11.9925 |
| 17 | A | 681.6833  | 3.2980  | 4.0679   | 0.2890  |
| 18 | A | 705.4173  | 2.9034  | 6.1138   | 0.2528  |
| 19 | A | 901.6790  | 3.5736  | 222.4393 | 0.2420  |
| 20 | A | 1044.7707 | 8.5814  | 277.6316 | 0.0613  |
| 21 | A | 1073.9802 | 6.9828  | 14.8799  | 2.5398  |
| 22 | A | 1212.7284 | 7.4969  | 9.2536   | 1.5119  |
| 23 | A | 1235.0789 | 1.6726  | 166.3908 | 3.0590  |
| 24 | A | 1344.1765 | 5.2365  | 20.3366  | 8.2957  |
| 25 | A | 1353.7582 | 11.8435 | 30.9960  | 3.2891  |
| 26 | A | 1419.9946 | 13.9016 | 597.7215 | 2.1787  |
| 27 | A | 1461.8744 | 11.8865 | 116.7789 | 0.8006  |
| 28 | A | 1580.7479 | 13.3859 | 73.5573  | 7.0228  |
| 29 | A | 1588.4956 | 14.0397 | 90.9914  | 3.7287  |
| 30 | A | 3640.3001 | 8.3222  | 115.6463 | 79.9030 |

py-14\_A\_bp86

| NM# | Symm | Wavenumber | Force Const | IR Intens | Raman Activ |
|-----|------|------------|-------------|-----------|-------------|
| 1   | A    | 112.5384   | 0.1362      | 0.0656    | 0.0004      |
| 2   | A    | 151.0981   | 0.1736      | 0.2858    | 0.0274      |
| 3   | A    | 200.8641   | 0.2879      | 0.7713    | 0.1543      |
| 4   | A    | 264.4946   | 0.5774      | 4.0604    | 0.3020      |
| 5   | A    | 266.1986   | 0.4283      | 2.2783    | 0.4080      |
| 6   | A    | 306.7444   | 0.5884      | 2.7931    | 0.1932      |
| 7   | A    | 330.4620   | 0.7142      | 0.0029    | 0.6886      |
| 8   | A    | 334.6786   | 1.0731      | 1.6693    | 0.4175      |
| 9   | A    | 409.3669   | 0.4276      | 20.2650   | 2.9547      |
| 10  | A    | 444.6326   | 1.8234      | 0.2464    | 5.2553      |
| 11  | A    | 447.0025   | 0.1565      | 96.5468   | 0.5634      |
| 12  | A    | 465.8860   | 1.8275      | 0.7251    | 7.2130      |
| 13  | A    | 582.6907   | 2.7516      | 0.9343    | 19.9612     |
| 14  | A    | 603.3100   | 2.5419      | 4.2117    | 0.2866      |
| 15  | A    | 636.0327   | 2.8373      | 0.0553    | 0.0398      |
| 16  | A    | 668.2151   | 4.0415      | 4.2763    | 12.6011     |



|    |   |           |         |          |         |
|----|---|-----------|---------|----------|---------|
| 17 | A | 670.8959  | 3.2111  | 4.2521   | 0.3008  |
| 18 | A | 709.4153  | 2.9065  | 5.9731   | 0.2641  |
| 19 | A | 917.4882  | 3.5108  | 209.6092 | 0.2276  |
| 20 | A | 1062.5948 | 8.8967  | 271.7819 | 0.0440  |
| 21 | A | 1098.4926 | 6.7395  | 17.7686  | 2.2341  |
| 22 | A | 1231.6987 | 4.3868  | 10.8345  | 0.6566  |
| 23 | A | 1245.6455 | 1.8498  | 161.2955 | 3.8966  |
| 24 | A | 1373.9776 | 7.1871  | 7.7044   | 7.9626  |
| 25 | A | 1379.5075 | 12.1028 | 36.6098  | 3.2856  |
| 26 | A | 1445.6289 | 14.7138 | 628.6037 | 2.1538  |
| 27 | A | 1489.0847 | 12.9455 | 124.2769 | 0.8469  |
| 28 | A | 1604.6504 | 14.5454 | 72.4058  | 6.5666  |
| 29 | A | 1611.1643 | 15.0448 | 93.9190  | 3.4942  |
| 30 | A | 3655.6054 | 8.3915  | 117.2289 | 77.2680 |

py-14\_A\_bpw91

| NM# | Symm | Wavenumber | Force Const | IR Intens | Raman Activ |
|-----|------|------------|-------------|-----------|-------------|
| 1   | A    | 112.3632   | 0.1358      | 0.0644    | 0.0005      |
| 2   | A    | 150.9449   | 0.1725      | 0.2987    | 0.0271      |
| 3   | A    | 202.3357   | 0.2928      | 0.8112    | 0.1552      |
| 4   | A    | 266.4351   | 0.6408      | 3.2699    | 0.3308      |
| 5   | A    | 268.7313   | 0.4127      | 2.9643    | 0.3699      |
| 6   | A    | 308.4288   | 0.5939      | 2.7845    | 0.1959      |
| 7   | A    | 332.2435   | 0.7160      | 0.0035    | 0.6778      |
| 8   | A    | 335.9876   | 1.0818      | 1.6722    | 0.4166      |
| 9   | A    | 411.6155   | 0.3843      | 24.3956   | 2.9417      |
| 10  | A    | 445.5016   | 1.8302      | 0.2483    | 5.1894      |
| 11  | A    | 447.1093   | 0.1629      | 92.5635   | 0.5395      |
| 12  | A    | 466.5983   | 1.8318      | 0.7193    | 7.1442      |
| 13  | A    | 583.9559   | 2.7652      | 0.9604    | 19.6874     |
| 14  | A    | 607.0756   | 2.5829      | 4.3194    | 0.2987      |
| 15  | A    | 641.6672   | 2.8930      | 0.0322    | 0.0335      |
| 16  | A    | 669.8120   | 4.0603      | 4.2994    | 12.5642     |
| 17  | A    | 678.9224   | 3.2865      | 4.2175    | 0.2823      |
| 18  | A    | 712.2533   | 2.9303      | 5.9578    | 0.2623      |
| 19  | A    | 919.6613   | 3.5447      | 211.9757  | 0.2263      |
| 20  | A    | 1065.0403  | 8.9373      | 273.5474  | 0.0423      |
| 21  | A    | 1099.9057  | 6.8055      | 17.3699   | 2.2168      |
| 22  | A    | 1234.4488  | 4.5852      | 10.0128   | 0.6727      |
| 23  | A    | 1248.7932  | 1.8220      | 162.6916  | 3.7914      |
| 24  | A    | 1378.4747  | 7.4965      | 5.8495    | 8.0669      |
| 25  | A    | 1383.5848  | 11.5829     | 36.7250   | 3.3112      |
| 26  | A    | 1449.7861  | 14.7249     | 627.1552  | 2.0640      |
| 27  | A    | 1493.3854  | 12.9053     | 125.3491  | 0.7943      |
| 28  | A    | 1609.7584  | 14.9206     | 78.0779   | 6.6904      |
| 29  | A    | 1616.2832  | 14.9890     | 88.8655   | 3.4182      |
| 30  | A    | 3679.9221  | 8.5039      | 117.2750  | 75.9180     |

py-14\_A\_camb3lyp

| NM# | Symm | Wavenumber | Force Const | IR Intens | Raman Activ |
|-----|------|------------|-------------|-----------|-------------|
| 1   | A    | 123.5438   | 0.1640      | 0.0787    | 0.0004      |
| 2   | A    | 161.6320   | 0.1966      | 0.3234    | 0.0216      |
| 3   | A    | 214.1248   | 0.3224      | 1.5608    | 0.1233      |
| 4   | A    | 278.2316   | 0.6588      | 3.7495    | 0.2223      |
| 5   | A    | 279.3414   | 0.4660      | 2.5390    | 0.3242      |
| 6   | A    | 321.5170   | 0.6388      | 2.9788    | 0.1533      |
| 7   | A    | 350.2568   | 0.7240      | 0.0030    | 0.6773      |
| 8   | A    | 352.1616   | 1.1870      | 2.2861    | 0.2956      |
| 9   | A    | 426.5040   | 0.1916      | 77.5890   | 2.5090      |
| 10  | A    | 452.2665   | 0.2910      | 57.0595   | 0.8237      |
| 11  | A    | 469.0847   | 2.0302      | 0.2363    | 4.6016      |
| 12  | A    | 491.6691   | 2.0181      | 0.5347    | 5.4964      |
| 13  | A    | 615.0959   | 3.0488      | 0.5692    | 16.8275     |
| 14  | A    | 653.3736   | 3.0163      | 4.1340    | 0.3528      |
| 15  | A    | 698.2349   | 3.4673      | 0.0323    | 0.0110      |
| 16  | A    | 710.0079   | 4.5421      | 4.4877    | 11.6995     |
| 17  | A    | 746.6407   | 3.1573      | 6.2854    | 0.1466      |
| 18  | A    | 750.6829   | 4.0366      | 8.2104    | 0.3202      |
| 19  | A    | 973.6323   | 3.6788      | 203.0504  | 0.2566      |
| 20  | A    | 1127.1301  | 9.9816      | 283.8387  | 0.1479      |
| 21  | A    | 1173.4128  | 5.9200      | 28.0230   | 1.6852      |
| 22  | A    | 1276.6920  | 2.1101      | 90.0428   | 1.1852      |
| 23  | A    | 1322.3682  | 11.5412     | 40.9606   | 2.2796      |
| 24  | A    | 1364.0114  | 3.6879      | 47.0004   | 10.3547     |
| 25  | A    | 1472.4929  | 15.9110     | 24.3033   | 4.1001      |
| 26  | A    | 1543.4088  | 16.9142     | 655.3387  | 1.9222      |
| 27  | A    | 1579.1990  | 15.8115     | 182.1256  | 3.0180      |
| 28  | A    | 1707.2923  | 19.5969     | 154.6175  | 9.0687      |
| 29  | A    | 1713.9319  | 16.5141     | 44.3930   | 3.5557      |
| 30  | A    | 3825.6762  | 9.1935      | 157.5236  | 64.0603     |

py-14\_A\_m062x

| NM# | Symm | Wavenumber | Force Const | IR Intens | Raman Activ |
|-----|------|------------|-------------|-----------|-------------|
| 1   | A    | 124.7201   | 0.1673      | 0.0691    | 0.0001      |
| 2   | A    | 161.9139   | 0.1968      | 0.2741    | 0.0243      |
| 3   | A    | 214.7698   | 0.3203      | 1.3725    | 0.1220      |
| 4   | A    | 276.8038   | 0.7176      | 0.2245    | 0.3104      |
| 5   | A    | 279.2435   | 0.4496      | 5.3516    | 0.1536      |
| 6   | A    | 321.8896   | 0.6372      | 2.9030    | 0.1518      |
| 7   | A    | 349.2522   | 0.6627      | 0.1762    | 0.6181      |
| 8   | A    | 354.3395   | 1.1974      | 2.6949    | 0.2935      |

|    |   |           |         |          |         |
|----|---|-----------|---------|----------|---------|
| 9  | A | 413.3964  | 0.1291  | 116.2632 | 2.1215  |
| 10 | A | 445.8899  | 0.6412  | 18.5605  | 1.5731  |
| 11 | A | 467.8547  | 2.0096  | 0.1919   | 4.6851  |
| 12 | A | 489.1109  | 1.9858  | 0.4988   | 5.2579  |
| 13 | A | 616.6188  | 3.0802  | 0.3632   | 15.5696 |
| 14 | A | 645.8844  | 2.9141  | 3.5780   | 0.2710  |
| 15 | A | 688.4992  | 3.3628  | 0.0352   | 0.0137  |
| 16 | A | 713.1795  | 4.5627  | 3.9387   | 12.1647 |
| 17 | A | 731.7589  | 3.8526  | 8.3925   | 0.3397  |
| 18 | A | 745.1014  | 3.1526  | 5.9563   | 0.1549  |
| 19 | A | 987.0325  | 3.6892  | 186.9554 | 0.3011  |
| 20 | A | 1136.2955 | 10.1493 | 275.8664 | 0.2492  |
| 21 | A | 1195.9911 | 4.9173  | 34.8073  | 1.5870  |
| 22 | A | 1285.1397 | 2.4211  | 74.5058  | 1.2131  |
| 23 | A | 1340.8788 | 11.5291 | 36.0135  | 2.0638  |
| 24 | A | 1361.7633 | 3.4457  | 50.9594  | 9.5036  |
| 25 | A | 1491.1646 | 16.4169 | 27.6409  | 4.3872  |
| 26 | A | 1560.9755 | 17.6185 | 665.6172 | 1.8255  |
| 27 | A | 1593.6511 | 16.3832 | 198.4049 | 4.4495  |
| 28 | A | 1715.2302 | 20.4022 | 162.2799 | 8.6346  |
| 29 | A | 1723.1446 | 16.5698 | 24.1485  | 2.9038  |
| 30 | A | 3851.2256 | 9.3181  | 164.1865 | 67.1790 |

py-14\_A\_mn15

| NM# | Symm | Wavenumber | Force Const | IR Intens | Raman Activ |
|-----|------|------------|-------------|-----------|-------------|
| 1   | A    | 121.9345   | 0.1594      | 0.0844    | 0.0001      |
| 2   | A    | 159.9173   | 0.1908      | 0.3303    | 0.0245      |
| 3   | A    | 211.9391   | 0.3143      | 1.5076    | 0.1424      |
| 4   | A    | 268.6110   | 0.6507      | 0.2331    | 0.3199      |
| 5   | A    | 272.1048   | 0.4284      | 5.7657    | 0.1409      |
| 6   | A    | 316.2320   | 0.6067      | 3.1425    | 0.1592      |
| 7   | A    | 346.9029   | 0.6953      | 0.0106    | 0.6346      |
| 8   | A    | 349.3853   | 1.1601      | 2.8725    | 0.2902      |
| 9   | A    | 425.4867   | 0.2079      | 69.9862   | 2.7100      |
| 10  | A    | 450.1894   | 0.2609      | 64.5746   | 0.6831      |
| 11  | A    | 457.3247   | 1.9059      | 0.2030    | 4.7538      |
| 12  | A    | 477.7811   | 1.8866      | 0.7915    | 5.4727      |
| 13  | A    | 610.2350   | 2.9927      | 0.4401    | 15.7052     |
| 14  | A    | 643.3721   | 2.9331      | 3.4373    | 0.2637      |
| 15  | A    | 685.7461   | 3.3483      | 0.1027    | 0.0204      |
| 16  | A    | 702.6663   | 4.4272      | 2.8114    | 13.5987     |
| 17  | A    | 732.2584   | 3.8523      | 8.2121    | 0.3539      |
| 18  | A    | 736.7612   | 3.0124      | 6.4484    | 0.1699      |
| 19  | A    | 977.4908   | 3.2635      | 188.1537  | 0.2792      |
| 20  | A    | 1130.7300  | 10.0490     | 282.2912  | 0.1518      |
| 21  | A    | 1183.2875  | 3.7928      | 52.3726   | 1.3205      |
| 22  | A    | 1261.7482  | 1.9350      | 92.9913   | 0.9403      |

|    |   |           |         |          |         |
|----|---|-----------|---------|----------|---------|
| 23 | A | 1328.3725 | 12.0426 | 33.7579  | 2.3650  |
| 24 | A | 1362.4172 | 6.1230  | 17.3401  | 9.6302  |
| 25 | A | 1483.7250 | 16.2686 | 31.2957  | 4.1591  |
| 26 | A | 1555.9751 | 17.6370 | 695.8026 | 1.8121  |
| 27 | A | 1589.9018 | 16.7398 | 207.9068 | 3.6090  |
| 28 | A | 1705.0886 | 20.2794 | 161.7450 | 9.0174  |
| 29 | A | 1711.2381 | 17.3153 | 31.6139  | 3.6515  |
| 30 | A | 3859.6055 | 9.3563  | 161.4373 | 66.9876 |

py-14\_A\_mp2

| NM# | Symm | Wavenumber | Force Const | IR Intens | Raman Activ |
|-----|------|------------|-------------|-----------|-------------|
| 1   | A    | 117.3267   | 0.1497      | 0.0008    | 0.0008      |
| 2   | A    | 146.6091   | 0.1632      | 0.0385    | 0.0164      |
| 3   | A    | 208.8140   | 0.2947      | 0.3869    | 0.1177      |
| 4   | A    | 278.8105   | 0.7432      | 2.3898    | 0.2288      |
| 5   | A    | 280.6583   | 0.4349      | 3.3042    | 0.2837      |
| 6   | A    | 315.3313   | 0.0736      | 103.2091  | 0.3253      |
| 7   | A    | 319.4930   | 0.6609      | 2.6496    | 0.1618      |
| 8   | A    | 342.7136   | 0.4787      | 22.7420   | 1.2453      |
| 9   | A    | 348.0005   | 1.1580      | 2.0628    | 0.2682      |
| 10  | A    | 415.7658   | 0.8930      | 0.3171    | 1.0327      |
| 11  | A    | 439.7543   | 1.2080      | 0.2295    | 1.6091      |
| 12  | A    | 462.4676   | 1.9603      | 0.1776    | 5.0327      |
| 13  | A    | 483.9483   | 1.9655      | 0.6506    | 6.0012      |
| 14  | A    | 597.9912   | 2.5314      | 8.1193    | 0.5642      |
| 15  | A    | 602.2982   | 2.9242      | 0.3712    | 17.1684     |
| 16  | A    | 613.7539   | 2.5361      | 0.8935    | 0.0015      |
| 17  | A    | 703.2042   | 4.4950      | 3.6901    | 12.9524     |
| 18  | A    | 731.5025   | 3.0950      | 5.7172    | 0.1378      |
| 19  | A    | 963.1364   | 3.8306      | 182.0483  | 0.2051      |
| 20  | A    | 1103.2121  | 9.5884      | 272.9223  | 0.2442      |
| 21  | A    | 1166.7742  | 6.8697      | 17.0032   | 0.8116      |
| 22  | A    | 1294.9535  | 2.6651      | 38.8226   | 0.1491      |
| 23  | A    | 1306.9709  | 2.7001      | 114.3050  | 3.1252      |
| 24  | A    | 1448.6226  | 15.3652     | 33.3552   | 5.2438      |
| 25  | A    | 1460.7880  | 9.9516      | 14.1380   | 9.2841      |
| 26  | A    | 1527.7065  | 16.6702     | 624.4132  | 2.6185      |
| 27  | A    | 1566.3934  | 15.2954     | 127.9034  | 3.8587      |
| 28  | A    | 1683.3044  | 15.5345     | 36.4941   | 5.5537      |
| 29  | A    | 1690.9665  | 18.3463     | 119.9424  | 7.3265      |
| 30  | A    | 3833.6760  | 9.2323      | 146.3487  | 71.0244     |

py-14\_A\_o3lyp

| NM# | Symm | Wavenumber | Force Const | IR Intens | Raman Activ |
|-----|------|------------|-------------|-----------|-------------|
|-----|------|------------|-------------|-----------|-------------|

|    |   |           |         |          |         |
|----|---|-----------|---------|----------|---------|
| 1  | A | 117.1800  | 0.1479  | 0.0604   | 0.0005  |
| 2  | A | 155.3440  | 0.1802  | 0.3068   | 0.0233  |
| 3  | A | 211.5995  | 0.3211  | 0.9642   | 0.1367  |
| 4  | A | 278.0690  | 0.7571  | 2.3470   | 0.2809  |
| 5  | A | 281.9603  | 0.4392  | 3.5079   | 0.2911  |
| 6  | A | 319.7947  | 0.6381  | 2.6903   | 0.1766  |
| 7  | A | 345.2202  | 0.7383  | 0.0002   | 0.7089  |
| 8  | A | 347.9062  | 1.1604  | 1.7780   | 0.3845  |
| 9  | A | 418.4320  | 0.1759  | 74.7102  | 2.6310  |
| 10 | A | 446.8671  | 0.3004  | 48.1640  | 1.0084  |
| 11 | A | 457.6426  | 1.9257  | 0.2377   | 4.8278  |
| 12 | A | 478.8299  | 1.9152  | 0.6345   | 6.2377  |
| 13 | A | 600.6220  | 2.9185  | 0.7275   | 18.8275 |
| 14 | A | 634.6772  | 2.8273  | 5.1151   | 0.4504  |
| 15 | A | 677.6159  | 3.2466  | 0.0084   | 0.0193  |
| 16 | A | 690.7068  | 4.3149  | 4.2839   | 11.1929 |
| 17 | A | 724.0482  | 3.7312  | 4.9350   | 0.2802  |
| 18 | A | 735.2945  | 3.1090  | 5.7170   | 0.2148  |
| 19 | A | 952.9956  | 3.7236  | 207.5010 | 0.2530  |
| 20 | A | 1099.6750 | 9.5228  | 275.6653 | 0.0480  |
| 21 | A | 1144.6290 | 6.7820  | 18.9566  | 1.9041  |
| 22 | A | 1273.9537 | 2.0260  | 68.0671  | 0.3062  |
| 23 | A | 1287.4600 | 4.6760  | 96.0115  | 3.6030  |
| 24 | A | 1399.6091 | 6.3176  | 22.7771  | 8.7082  |
| 25 | A | 1435.6525 | 15.0277 | 24.9925  | 4.2823  |
| 26 | A | 1504.4996 | 15.8411 | 660.9475 | 1.6083  |
| 27 | A | 1544.2519 | 14.1759 | 156.7012 | 1.2980  |
| 28 | A | 1663.3659 | 18.2333 | 133.9561 | 7.5179  |
| 29 | A | 1670.0619 | 15.1036 | 44.9346  | 2.8029  |
| 30 | A | 3819.5397 | 9.1640  | 131.7291 | 70.9338 |

-----

py-14\_A\_pbe0

| NM# | Symm | Wavenumber | Force Const | IR Intens | Raman Activ |
|-----|------|------------|-------------|-----------|-------------|
| 1   | A    | 121.3423   | 0.1582      | 0.0725    | 0.0002      |
| 2   | A    | 160.0344   | 0.1920      | 0.2829    | 0.0226      |
| 3   | A    | 213.8525   | 0.3225      | 0.9715    | 0.1272      |
| 4   | A    | 276.4840   | 0.7386      | 2.5939    | 0.2457      |
| 5   | A    | 277.1889   | 0.4215      | 3.5978    | 0.2798      |
| 6   | A    | 321.5176   | 0.6448      | 2.8558    | 0.1543      |
| 7   | A    | 349.4551   | 0.7319      | 0.0165    | 0.6880      |
| 8   | A    | 352.8069   | 1.1909      | 2.0872    | 0.3216      |
| 9   | A    | 426.8400   | 0.2096      | 66.2585   | 2.7409      |
| 10  | A    | 453.3127   | 0.2617      | 61.7629   | 0.7700      |
| 11  | A    | 465.5621   | 1.9882      | 0.2305    | 4.6811      |
| 12  | A    | 487.7348   | 1.9793      | 0.6608    | 5.6329      |
| 13  | A    | 614.4297   | 3.0535      | 0.5910    | 17.2674     |
| 14  | A    | 645.0912   | 2.9312      | 3.9769    | 0.3487      |

|    |   |           |         |          |         |
|----|---|-----------|---------|----------|---------|
| 15 | A | 687.0516  | 3.3440  | 0.0397   | 0.0181  |
| 16 | A | 706.8218  | 4.5051  | 3.7435   | 11.7321 |
| 17 | A | 730.3013  | 3.8218  | 6.8527   | 0.3351  |
| 18 | A | 745.7629  | 3.1617  | 6.0174   | 0.1914  |
| 19 | A | 976.0641  | 3.6950  | 198.3491 | 0.2505  |
| 20 | A | 1128.1440 | 10.0184 | 276.6393 | 0.0906  |
| 21 | A | 1178.7490 | 6.1550  | 25.8299  | 1.5041  |
| 22 | A | 1290.8682 | 1.7566  | 108.3972 | 0.8937  |
| 23 | A | 1321.6165 | 10.5634 | 45.9529  | 2.5929  |
| 24 | A | 1407.7581 | 6.2089  | 22.4623  | 8.9887  |
| 25 | A | 1475.5380 | 15.9992 | 27.8867  | 4.0989  |
| 26 | A | 1544.6458 | 16.9625 | 672.0473 | 1.7171  |
| 27 | A | 1582.5445 | 15.7102 | 172.8774 | 2.3412  |
| 28 | A | 1702.9732 | 19.6377 | 151.7674 | 8.1742  |
| 29 | A | 1709.6124 | 16.1736 | 37.7583  | 3.0413  |
| 30 | A | 3842.9271 | 9.2761  | 145.9382 | 66.2119 |

-----

py-14\_A\_pbe

| NM# | Symm | Wavenumber | Force Const | IR Intens | Raman Activ |
|-----|------|------------|-------------|-----------|-------------|
| 1   | A    | 112.9211   | 0.1371      | 0.0665    | 0.0005      |
| 2   | A    | 151.7347   | 0.1750      | 0.2918    | 0.0265      |
| 3   | A    | 201.3992   | 0.2890      | 0.7523    | 0.1491      |
| 4   | A    | 265.2469   | 0.6984      | 2.3297    | 0.3653      |
| 5   | A    | 267.1378   | 0.3887      | 3.7928    | 0.3221      |
| 6   | A    | 308.0252   | 0.5873      | 2.8434    | 0.1929      |
| 7   | A    | 332.3884   | 0.7219      | 0.0026    | 0.6956      |
| 8   | A    | 336.2036   | 1.0817      | 1.6925    | 0.4220      |
| 9   | A    | 411.5234   | 0.4215      | 21.1176   | 2.9774      |
| 10  | A    | 445.4531   | 1.8272      | 0.2438    | 5.1666      |
| 11  | A    | 449.7907   | 0.1596      | 95.5343   | 0.5707      |
| 12  | A    | 466.5013   | 1.8295      | 0.7451    | 7.1818      |
| 13  | A    | 585.3431   | 2.7801      | 0.9608    | 19.5934     |
| 14  | A    | 607.5476   | 2.5919      | 4.4303    | 0.3377      |
| 15  | A    | 643.4237   | 2.9115      | 0.0359    | 0.0356      |
| 16  | A    | 670.8514   | 4.0686      | 4.0248    | 12.4970     |
| 17  | A    | 682.4169   | 3.3167      | 3.9997    | 0.2837      |
| 18  | A    | 711.8566   | 2.9220      | 5.9267    | 0.2607      |
| 19  | A    | 922.7861   | 3.5303      | 208.7464  | 0.2304      |
| 20  | A    | 1068.9454  | 9.0078      | 270.7438  | 0.0551      |
| 21  | A    | 1104.8323  | 6.7294      | 18.1557   | 2.1281      |
| 22  | A    | 1238.0242  | 3.6376      | 16.0306   | 0.4193      |
| 23  | A    | 1250.6353  | 1.9961      | 155.2761  | 4.0799      |
| 24  | A    | 1385.9458  | 9.6443      | 0.2198    | 7.4589      |
| 25  | A    | 1389.4606  | 9.5336      | 40.7401   | 4.1644      |
| 26  | A    | 1455.0712  | 14.8863     | 636.2852  | 2.0577      |
| 27  | A    | 1499.5296  | 13.1812     | 126.9135  | 0.8115      |
| 28  | A    | 1615.1675  | 15.1728     | 77.4175   | 6.5536      |

|    |   |           |         |          |         |
|----|---|-----------|---------|----------|---------|
| 29 | A | 1621.5299 | 15.2595 | 89.8878  | 3.3391  |
| 30 | A | 3669.3500 | 8.4548  | 118.9391 | 77.1615 |

py-14\_A\_rtpss

| NM# | Symm | Wavenumber | Force Const | IR Intens | Raman Activ |
|-----|------|------------|-------------|-----------|-------------|
| 1   | A    | 115.4160   | 0.1431      | 0.0666    | 0.0003      |
| 2   | A    | 154.3218   | 0.1817      | 0.2943    | 0.0253      |
| 3   | A    | 202.4148   | 0.2901      | 0.8740    | 0.1382      |
| 4   | A    | 257.9783   | 0.5324      | 0.4447    | 0.4474      |
| 5   | A    | 259.4398   | 0.4222      | 5.6379    | 0.1967      |
| 6   | A    | 304.9455   | 0.5760      | 2.8535    | 0.1696      |
| 7   | A    | 333.2928   | 0.7387      | 0.0109    | 0.6830      |
| 8   | A    | 336.0016   | 1.0775      | 1.8762    | 0.3902      |
| 9   | A    | 412.9348   | 0.5230      | 14.6116   | 2.9241      |
| 10  | A    | 446.4642   | 1.8248      | 0.2664    | 5.2126      |
| 11  | A    | 456.4122   | 0.1550      | 100.7574  | 0.6436      |
| 12  | A    | 467.9101   | 1.8421      | 0.7605    | 6.9630      |
| 13  | A    | 588.6295   | 2.8036      | 0.7986    | 19.9459     |
| 14  | A    | 606.3923   | 2.5597      | 4.1711    | 0.2852      |
| 15  | A    | 638.0963   | 2.8370      | 0.0654    | 0.0453      |
| 16  | A    | 669.6709   | 3.2042      | 4.5340    | 0.2812      |
| 17  | A    | 674.8217   | 4.1277      | 4.2089    | 12.4137     |
| 18  | A    | 710.1917   | 2.9058      | 5.8710    | 0.2842      |
| 19  | A    | 925.5176   | 3.5988      | 208.6008  | 0.2437      |
| 20  | A    | 1071.7229  | 9.0700      | 274.0727  | 0.0346      |
| 21  | A    | 1110.0465  | 7.3313      | 16.9787   | 2.1826      |
| 22  | A    | 1242.6901  | 7.2218      | 6.7550    | 1.2234      |
| 23  | A    | 1261.6556  | 1.6375      | 168.8471  | 3.3744      |
| 24  | A    | 1387.6714  | 6.9973      | 11.1665   | 7.5802      |
| 25  | A    | 1393.6925  | 12.4958     | 36.5784   | 3.1659      |
| 26  | A    | 1465.2214  | 15.2717     | 628.3145  | 2.5191      |
| 27  | A    | 1507.9515  | 13.6531     | 124.6318  | 0.8926      |
| 28  | A    | 1629.6496  | 13.3125     | 33.1347   | 5.5413      |
| 29  | A    | 1637.7165  | 17.1728     | 135.1817  | 4.9798      |
| 30  | A    | 3661.8686  | 8.4201      | 105.1868  | 76.8759     |

py-14\_A\_tpssh

| NM# | Symm | Wavenumber | Force Const | IR Intens | Raman Activ |
|-----|------|------------|-------------|-----------|-------------|
| 1   | A    | 118.1288   | 0.1500      | 0.0685    | 0.0003      |
| 2   | A    | 156.9667   | 0.1866      | 0.2975    | 0.0244      |
| 3   | A    | 208.8883   | 0.3096      | 1.0592    | 0.1367      |
| 4   | A    | 266.5800   | 0.4507      | 5.7466    | 0.1912      |
| 5   | A    | 267.2046   | 0.5504      | 0.5992    | 0.4149      |
| 6   | A    | 312.1653   | 0.6106      | 2.8101    | 0.1665      |

|    |   |           |         |          |         |
|----|---|-----------|---------|----------|---------|
| 7  | A | 341.6943  | 0.7471  | 0.0056   | 0.6845  |
| 8  | A | 342.9786  | 1.1259  | 1.9819   | 0.3634  |
| 9  | A | 422.5128  | 0.3608  | 30.1058  | 3.0100  |
| 10 | A | 453.8057  | 0.1760  | 92.2697  | 0.5180  |
| 11 | A | 455.8289  | 1.9063  | 0.2503   | 4.9761  |
| 12 | A | 477.7903  | 1.9150  | 0.6739   | 6.3840  |
| 13 | A | 599.1763  | 2.8974  | 0.6710   | 19.1679 |
| 14 | A | 626.0609  | 2.7403  | 4.3275   | 0.3190  |
| 15 | A | 662.1072  | 3.0814  | 0.0338   | 0.0273  |
| 16 | A | 688.8348  | 4.2993  | 4.2594   | 11.7634 |
| 17 | A | 699.9272  | 3.5012  | 5.5618   | 0.2939  |
| 18 | A | 726.4351  | 3.0277  | 5.9550   | 0.2414  |
| 19 | A | 945.6808  | 3.6684  | 206.7089 | 0.2475  |
| 20 | A | 1093.0198 | 9.4129  | 279.3940 | 0.0421  |
| 21 | A | 1137.2018 | 7.0782  | 19.4631  | 1.9268  |
| 22 | A | 1268.5355 | 2.6737  | 38.2112  | 0.0895  |
| 23 | A | 1280.0864 | 3.0537  | 129.3935 | 4.0255  |
| 24 | A | 1390.3309 | 5.8911  | 21.1832  | 8.1758  |
| 25 | A | 1424.5879 | 14.7627 | 26.5587  | 3.7226  |
| 26 | A | 1495.5389 | 15.8396 | 648.8121 | 2.0322  |
| 27 | A | 1534.8540 | 14.2340 | 145.8014 | 1.2889  |
| 28 | A | 1658.3473 | 15.6420 | 77.3646  | 6.9741  |
| 29 | A | 1664.1877 | 16.2612 | 100.6321 | 4.0424  |
| 30 | A | 3748.9833 | 8.8274  | 123.8237 | 72.1579 |

py-14\_A\_wb97xd

| NM# | Symm | Wavenumber | Force Const | IR Intens | Raman Activ |
|-----|------|------------|-------------|-----------|-------------|
| 1   | A    | 122.0401   | 0.1602      | 0.0685    | 0.0003      |
| 2   | A    | 159.8492   | 0.1908      | 0.2907    | 0.0217      |
| 3   | A    | 215.5056   | 0.3286      | 1.1473    | 0.1269      |
| 4   | A    | 280.2412   | 0.6050      | 4.5149    | 0.2002      |
| 5   | A    | 281.8791   | 0.5031      | 1.8659    | 0.3359      |
| 6   | A    | 323.4741   | 0.6610      | 2.7677    | 0.1480      |
| 7   | A    | 349.5584   | 0.7109      | 0.0247    | 0.6652      |
| 8   | A    | 353.5307   | 1.1982      | 2.0851    | 0.3052      |
| 9   | A    | 422.7227   | 0.1579      | 93.5121   | 2.2383      |
| 10  | A    | 450.3608   | 0.3924      | 37.8906   | 1.1117      |
| 11  | A    | 467.3776   | 2.0108      | 0.2391    | 4.6450      |
| 12  | A    | 489.5597   | 1.9998      | 0.5360    | 5.4583      |
| 13  | A    | 612.9653   | 3.0278      | 0.6167    | 17.1917     |
| 14  | A    | 648.9215   | 2.9506      | 3.9634    | 0.3273      |
| 15  | A    | 691.1119   | 3.3880      | 0.0234    | 0.0111      |
| 16  | A    | 706.9520   | 4.5090      | 4.5336    | 11.6816     |
| 17  | A    | 736.0268   | 3.8812      | 7.7699    | 0.3188      |
| 18  | A    | 747.9404   | 3.1844      | 6.1082    | 0.1518      |
| 19  | A    | 973.0639   | 3.7318      | 204.6460  | 0.2497      |
| 20  | A    | 1126.8316  | 9.9776      | 281.0345  | 0.1363      |



|    |   |           |         |          |         |
|----|---|-----------|---------|----------|---------|
| 21 | A | 1173.1914 | 6.2418  | 24.0606  | 1.6845  |
| 22 | A | 1283.0544 | 2.0469  | 92.3266  | 1.0677  |
| 23 | A | 1319.9260 | 11.1735 | 43.1095  | 2.3771  |
| 24 | A | 1374.2941 | 3.9254  | 47.7191  | 10.3314 |
| 25 | A | 1469.0919 | 15.8485 | 25.6334  | 4.0601  |
| 26 | A | 1541.0563 | 16.7245 | 667.6141 | 1.8235  |
| 27 | A | 1579.8601 | 15.6321 | 176.2531 | 2.8983  |
| 28 | A | 1704.5339 | 19.7916 | 163.6690 | 8.7359  |
| 29 | A | 1712.2475 | 16.1286 | 36.0873  | 3.2755  |
| 30 | A | 3871.9321 | 9.4180  | 146.1085 | 63.3161 |

py-14\_A\_x3lyp

| NM# | Symm | Wavenumber | Force Const | IR Intens | Raman Activ |
|-----|------|------------|-------------|-----------|-------------|
| 1   | A    | 120.7254   | 0.1568      | 0.0717    | 0.0004      |
| 2   | A    | 158.7612   | 0.1905      | 0.3181    | 0.0228      |
| 3   | A    | 211.4386   | 0.3162      | 1.3927    | 0.1332      |
| 4   | A    | 276.6803   | 0.7014      | 3.1054    | 0.2632      |
| 5   | A    | 278.7206   | 0.4444      | 3.0232    | 0.3252      |
| 6   | A    | 318.5456   | 0.6282      | 2.8594    | 0.1698      |
| 7   | A    | 345.7235   | 0.7305      | 0.0002    | 0.7077      |
| 8   | A    | 347.8429   | 1.1589      | 2.1025    | 0.3417      |
| 9   | A    | 420.7805   | 0.2019      | 67.3803   | 2.7792      |
| 10  | A    | 446.7791   | 0.2555      | 61.8804   | 0.7984      |
| 11  | A    | 463.4171   | 1.9844      | 0.2349    | 4.8295      |
| 12  | A    | 485.7949   | 1.9795      | 0.5552    | 6.0843      |
| 13  | A    | 604.6319   | 2.9443      | 0.6525    | 18.4678     |
| 14  | A    | 640.4333   | 2.8795      | 4.6886    | 0.3859      |
| 15  | A    | 681.4636   | 3.2919      | 0.0335    | 0.0180      |
| 16  | A    | 698.0456   | 4.4065      | 4.9223    | 11.2754     |
| 17  | A    | 729.3147   | 3.7984      | 6.5276    | 0.3284      |
| 18  | A    | 737.9480   | 3.1195      | 6.0508    | 0.1899      |
| 19  | A    | 955.5006   | 3.7133      | 209.2076  | 0.2616      |
| 20  | A    | 1104.4604  | 9.5866      | 283.1909  | 0.0748      |
| 21  | A    | 1148.2045  | 6.6829      | 21.1451   | 1.8313      |
| 22  | A    | 1272.0642  | 1.9216      | 92.3948   | 0.6447      |
| 23  | A    | 1293.5641  | 8.2836      | 62.1712   | 3.0886      |
| 24  | A    | 1373.3625  | 4.5526      | 35.7609   | 8.8707      |
| 25  | A    | 1438.5167  | 15.1149     | 24.5323   | 4.0222      |
| 26  | A    | 1508.2207  | 15.9930     | 642.7082  | 1.8048      |
| 27  | A    | 1545.0025  | 14.5157     | 161.9520  | 1.9385      |
| 28  | A    | 1668.3169  | 17.6887     | 127.2133  | 8.2459      |
| 29  | A    | 1674.8035  | 15.3915     | 59.0990   | 3.4734      |
| 30  | A    | 3796.7271  | 9.0548      | 142.6221  | 69.9475     |

py-14\_B\_b3lyp

| NM# | Symm | Wavenumber | Force Const | IR Intens | Raman Activ |
|-----|------|------------|-------------|-----------|-------------|
| 1   | A    | 119.8738   | 0.1546      | 0.0708    | 0.0004      |
| 2   | A    | 157.9993   | 0.1886      | 0.3204    | 0.0230      |
| 3   | A    | 210.2774   | 0.3123      | 1.3665    | 0.1352      |
| 4   | A    | 277.2946   | 0.7462      | 2.5512    | 0.2970      |
| 5   | A    | 279.3699   | 0.4337      | 3.5100    | 0.3083      |
| 6   | A    | 318.4388   | 0.6264      | 2.8748    | 0.1725      |
| 7   | A    | 344.0976   | 0.7242      | 0.0001    | 0.7020      |
| 8   | A    | 347.2792   | 1.1552      | 2.0846    | 0.3342      |
| 9   | A    | 419.9497   | 0.2144      | 61.8487   | 2.8226      |
| 10  | A    | 446.0679   | 0.2381      | 66.4465   | 0.7233      |
| 11  | A    | 463.0497   | 1.9826      | 0.2393    | 4.8595      |
| 12  | A    | 486.2226   | 1.9819      | 0.5526    | 6.1067      |
| 13  | A    | 604.9592   | 2.9581      | 0.7009    | 18.5167     |
| 14  | A    | 637.2330   | 2.8558      | 4.5729    | 0.3703      |
| 15  | A    | 677.7549   | 3.2543      | 0.0315    | 0.0184      |
| 16  | A    | 697.1423   | 4.3952      | 5.0383    | 11.4094     |
| 17  | A    | 725.0667   | 3.7559      | 6.4416    | 0.3258      |
| 18  | A    | 736.4757   | 3.1153      | 6.0429    | 0.1937      |
| 19  | A    | 952.9016   | 3.7321      | 211.1496  | 0.2551      |
| 20  | A    | 1101.9710  | 9.5440      | 283.8028  | 0.0711      |
| 21  | A    | 1144.7854  | 6.7650      | 20.2283   | 1.8474      |
| 22  | A    | 1271.2143  | 1.9531      | 87.9986   | 0.5474      |
| 23  | A    | 1290.9082  | 7.6169      | 67.1957   | 3.2522      |
| 24  | A    | 1373.2123  | 4.5336      | 35.5623   | 8.7458      |
| 25  | A    | 1437.4589  | 15.0833     | 26.0982   | 3.8889      |
| 26  | A    | 1503.5853  | 15.8529     | 640.6602  | 1.8508      |
| 27  | A    | 1541.6959  | 14.4140     | 155.3472  | 1.8406      |
| 28  | A    | 1663.3610  | 17.4091     | 123.9865  | 8.1941      |
| 29  | A    | 1670.0679  | 15.1917     | 60.5178   | 3.5055      |
| 30  | A    | 3790.5368  | 9.0249      | 139.7155  | 69.9129     |

py-14\_B\_m062x

| NM# | Symm | Wavenumber | Force Const | IR Intens | Raman Activ |
|-----|------|------------|-------------|-----------|-------------|
| 1   | A    | 124.7201   | 0.1673      | 0.0691    | 0.0001      |
| 2   | A    | 161.9141   | 0.1968      | 0.2741    | 0.0243      |
| 3   | A    | 214.7699   | 0.3203      | 1.3725    | 0.1220      |
| 4   | A    | 276.8037   | 0.7176      | 0.2245    | 0.3104      |
| 5   | A    | 279.2442   | 0.4496      | 5.3516    | 0.1536      |
| 6   | A    | 321.8895   | 0.6372      | 2.9030    | 0.1518      |
| 7   | A    | 349.2521   | 0.6627      | 0.1762    | 0.6181      |
| 8   | A    | 354.3395   | 1.1974      | 2.6949    | 0.2935      |
| 9   | A    | 413.3953   | 0.1291      | 116.2653  | 2.1214      |
| 10  | A    | 445.8903   | 0.6412      | 18.5584   | 1.5731      |
| 11  | A    | 467.8545   | 2.0096      | 0.1919    | 4.6851      |
| 12  | A    | 489.1111   | 1.9858      | 0.4988    | 5.2579      |

|    |   |           |         |          |         |
|----|---|-----------|---------|----------|---------|
| 13 | A | 616.6191  | 3.0803  | 0.3632   | 15.5697 |
| 14 | A | 645.8843  | 2.9141  | 3.5781   | 0.2710  |
| 15 | A | 688.4989  | 3.3628  | 0.0352   | 0.0137  |
| 16 | A | 713.1791  | 4.5627  | 3.9387   | 12.1646 |
| 17 | A | 731.7584  | 3.8525  | 8.3925   | 0.3397  |
| 18 | A | 745.1015  | 3.1526  | 5.9564   | 0.1549  |
| 19 | A | 987.0318  | 3.6892  | 186.9559 | 0.3011  |
| 20 | A | 1136.2964 | 10.1493 | 275.8661 | 0.2492  |
| 21 | A | 1195.9912 | 4.9174  | 34.8081  | 1.5870  |
| 22 | A | 1285.1389 | 2.4210  | 74.5085  | 1.2130  |
| 23 | A | 1340.8773 | 11.5289 | 36.0145  | 2.0639  |
| 24 | A | 1361.7641 | 3.4458  | 50.9557  | 9.5036  |
| 25 | A | 1491.1652 | 16.4169 | 27.6415  | 4.3872  |
| 26 | A | 1560.9764 | 17.6185 | 665.6127 | 1.8255  |
| 27 | A | 1593.6512 | 16.3832 | 198.4055 | 4.4495  |
| 28 | A | 1715.2316 | 20.4022 | 162.2789 | 8.6347  |
| 29 | A | 1723.1444 | 16.5699 | 24.1529  | 2.9038  |
| 30 | A | 3851.2269 | 9.3181  | 164.1873 | 67.1789 |

py-14\_B\_mp2

| NM# | Symm | Wavenumber | Force Const | IR Intens | Raman Activ |
|-----|------|------------|-------------|-----------|-------------|
| 1   | A    | 117.3270   | 0.1497      | 0.0008    | 0.0008      |
| 2   | A    | 146.6091   | 0.1632      | 0.0385    | 0.0164      |
| 3   | A    | 208.8144   | 0.2947      | 0.3870    | 0.1177      |
| 4   | A    | 278.8105   | 0.7432      | 2.3905    | 0.2288      |
| 5   | A    | 280.6583   | 0.4349      | 3.3036    | 0.2837      |
| 6   | A    | 315.3371   | 0.0736      | 103.2032  | 0.3253      |
| 7   | A    | 319.4932   | 0.6610      | 2.6495    | 0.1618      |
| 8   | A    | 342.7140   | 0.4786      | 22.7477   | 1.2454      |
| 9   | A    | 348.0007   | 1.1580      | 2.0628    | 0.2682      |
| 10  | A    | 415.7664   | 0.8931      | 0.3171    | 1.0328      |
| 11  | A    | 439.7546   | 1.2080      | 0.2295    | 1.6090      |
| 12  | A    | 462.4677   | 1.9603      | 0.1776    | 5.0327      |
| 13  | A    | 483.9484   | 1.9655      | 0.6506    | 6.0012      |
| 14  | A    | 597.9915   | 2.5314      | 8.1194    | 0.5642      |
| 15  | A    | 602.2979   | 2.9242      | 0.3712    | 17.1683     |
| 16  | A    | 613.7540   | 2.5361      | 0.8934    | 0.0015      |
| 17  | A    | 703.2045   | 4.4950      | 3.6902    | 12.9524     |
| 18  | A    | 731.5024   | 3.0950      | 5.7171    | 0.1378      |
| 19  | A    | 963.1367   | 3.8306      | 182.0480  | 0.2051      |
| 20  | A    | 1103.2118  | 9.5884      | 272.9240  | 0.2442      |
| 21  | A    | 1166.7737  | 6.8697      | 17.0017   | 0.8116      |
| 22  | A    | 1294.9552  | 2.6650      | 38.8231   | 0.1491      |
| 23  | A    | 1306.9713  | 2.7001      | 114.3044  | 3.1252      |
| 24  | A    | 1448.6215  | 15.3648     | 33.3610   | 5.2431      |
| 25  | A    | 1460.7884  | 9.9518      | 14.1295   | 9.2849      |
| 26  | A    | 1527.7051  | 16.6702     | 624.4150  | 2.6184      |

|    |   |           |         |          |         |
|----|---|-----------|---------|----------|---------|
| 27 | A | 1566.3950 | 15.2953 | 127.9030 | 3.8586  |
| 28 | A | 1683.3039 | 15.5350 | 36.5094  | 5.5544  |
| 29 | A | 1690.9664 | 18.3458 | 119.9277 | 7.3259  |
| 30 | A | 3833.6723 | 9.2323  | 146.3485 | 71.0246 |

py-15\_A\_b31yp

| NM# | Symm | Wavenumber | Force Const | IR Intens | Raman Activ |
|-----|------|------------|-------------|-----------|-------------|
| 1   | A    | 115.0345   | 0.1060      | 0.3232    | 0.0685      |
| 2   | A    | 200.1315   | 0.2588      | 0.7117    | 0.3141      |
| 3   | A    | 282.5106   | 0.6525      | 2.0207    | 0.7061      |
| 4   | A    | 297.2886   | 0.4403      | 0.9153    | 1.4708      |
| 5   | A    | 304.7713   | 0.6159      | 1.7324    | 0.1131      |
| 6   | A    | 353.9965   | 0.6898      | 8.0522    | 0.0559      |
| 7   | A    | 426.1038   | 0.2170      | 55.5106   | 1.4537      |
| 8   | A    | 454.9058   | 1.4201      | 1.2821    | 4.3596      |
| 9   | A    | 462.1737   | 0.3802      | 26.4623   | 2.0024      |
| 10  | A    | 495.4903   | 0.3565      | 45.2279   | 0.7712      |
| 11  | A    | 517.4863   | 1.8410      | 6.1749    | 12.0407     |
| 12  | A    | 650.7409   | 1.3234      | 18.9484   | 1.4290      |
| 13  | A    | 695.1743   | 4.2332      | 18.2298   | 1.2479      |
| 14  | A    | 697.0692   | 3.3215      | 0.9715    | 0.2275      |
| 15  | A    | 731.6278   | 2.8171      | 12.4584   | 0.8353      |
| 16  | A    | 759.3582   | 3.0354      | 12.1155   | 25.2609     |
| 17  | A    | 894.8676   | 0.6548      | 27.4324   | 0.1785      |
| 18  | A    | 900.9700   | 1.9729      | 75.6400   | 0.3150      |
| 19  | A    | 1150.0803  | 3.6806      | 26.0515   | 3.9674      |
| 20  | A    | 1175.7937  | 1.9189      | 344.4830  | 1.4269      |
| 21  | A    | 1205.3350  | 1.7774      | 65.3333   | 0.2825      |
| 22  | A    | 1274.1338  | 4.0337      | 170.1281  | 1.6508      |
| 23  | A    | 1357.1571  | 3.7706      | 3.5089    | 0.9119      |
| 24  | A    | 1417.4205  | 13.1283     | 9.2132    | 13.4129     |
| 25  | A    | 1467.5325  | 10.0513     | 87.4477   | 0.2159      |
| 26  | A    | 1525.2169  | 9.8662      | 688.0519  | 2.1160      |
| 27  | A    | 1652.4222  | 11.9779     | 0.4088    | 8.9321      |
| 28  | A    | 1677.4455  | 15.4750     | 32.4214   | 6.1341      |
| 29  | A    | 3216.9214  | 6.6674      | 2.5548    | 97.0314     |
| 30  | A    | 3788.9331  | 9.0082      | 121.4257  | 99.5880     |

py-15\_A\_b3p86

| NM# | Symm | Wavenumber | Force Const | IR Intens | Raman Activ |
|-----|------|------------|-------------|-----------|-------------|
| 1   | A    | 115.0977   | 0.1061      | 0.3144    | 0.0662      |
| 2   | A    | 202.0446   | 0.2637      | 0.5073    | 0.3060      |
| 3   | A    | 280.8154   | 0.6311      | 2.1051    | 0.6802      |
| 4   | A    | 299.4473   | 0.4443      | 0.9474    | 1.4336      |

|    |   |           |         |          |         |
|----|---|-----------|---------|----------|---------|
| 5  | A | 304.0427  | 0.6157  | 1.7503   | 0.0946  |
| 6  | A | 356.5795  | 0.7001  | 8.1466   | 0.0525  |
| 7  | A | 430.4272  | 0.2199  | 55.5651  | 1.4256  |
| 8  | A | 454.2822  | 1.3933  | 1.4461   | 4.2450  |
| 9  | A | 465.9403  | 0.4347  | 19.8839  | 1.8051  |
| 10 | A | 499.1520  | 0.3359  | 51.7106  | 0.9146  |
| 11 | A | 517.1449  | 1.8121  | 6.3840   | 11.1573 |
| 12 | A | 653.3435  | 1.3164  | 19.3844  | 1.4434  |
| 13 | A | 699.0316  | 3.3460  | 1.0019   | 0.2212  |
| 14 | A | 699.2267  | 4.2594  | 15.8079  | 1.3204  |
| 15 | A | 731.8930  | 2.9614  | 11.6640  | 0.7270  |
| 16 | A | 762.1920  | 3.0534  | 10.8474  | 25.4908 |
| 17 | A | 891.0226  | 0.6430  | 29.0709  | 0.1821  |
| 18 | A | 910.6233  | 1.8501  | 64.6859  | 0.3555  |
| 19 | A | 1166.0815 | 2.4181  | 51.4493  | 3.6078  |
| 20 | A | 1183.3114 | 1.9488  | 323.5503 | 0.9243  |
| 21 | A | 1211.9596 | 2.1948  | 49.8807  | 0.6862  |
| 22 | A | 1288.4547 | 3.5547  | 180.1072 | 1.5905  |
| 23 | A | 1380.9015 | 5.1103  | 1.2027   | 0.7988  |
| 24 | A | 1439.9455 | 13.6326 | 8.4627   | 12.9460 |
| 25 | A | 1486.0011 | 11.0312 | 82.6923  | 0.1758  |
| 26 | A | 1548.5412 | 10.9031 | 725.4858 | 1.8662  |
| 27 | A | 1674.7572 | 13.0674 | 0.2488   | 8.3046  |
| 28 | A | 1698.5300 | 16.4053 | 32.7171  | 6.6691  |
| 29 | A | 3229.6213 | 6.7221  | 3.2204   | 94.9931 |
| 30 | A | 3815.4371 | 9.1339  | 125.7077 | 97.0409 |

py-15\_A\_b3pw91

| NM# | Symm | Wavenumber | Force Const | IR Intens | Raman Activ |
|-----|------|------------|-------------|-----------|-------------|
| 1   | A    | 114.5429   | 0.1051      | 0.3150    | 0.0666      |
| 2   | A    | 201.9706   | 0.2633      | 0.5189    | 0.3088      |
| 3   | A    | 281.2907   | 0.6347      | 2.0766    | 0.6796      |
| 4   | A    | 298.9888   | 0.4427      | 0.9346    | 1.4436      |
| 5   | A    | 304.6240   | 0.6181      | 1.7596    | 0.0955      |
| 6   | A    | 356.1690   | 0.7003      | 8.0287    | 0.0539      |
| 7   | A    | 430.5127   | 0.2157      | 56.7836   | 1.4084      |
| 8   | A    | 453.3368   | 1.3934      | 1.4090    | 4.2614      |
| 9   | A    | 465.8668   | 0.4394      | 19.5659   | 1.8585      |
| 10  | A    | 498.5006   | 0.3402      | 50.3307   | 0.8959      |
| 11  | A    | 516.1539   | 1.8067      | 6.3511    | 11.2786     |
| 12  | A    | 653.2229   | 1.3212      | 19.2773   | 1.4342      |
| 13  | A    | 697.2970   | 4.2353      | 16.0168   | 1.3306      |
| 14  | A    | 699.4678   | 3.3508      | 0.9778    | 0.2185      |
| 15  | A    | 732.4929   | 2.9339      | 11.6561   | 0.7554      |
| 16  | A    | 759.8396   | 3.0358      | 10.9492   | 25.4421     |
| 17  | A    | 891.5560   | 0.6449      | 28.6504   | 0.1855      |
| 18  | A    | 908.4245   | 1.8761      | 66.9757   | 0.3431      |

|    |   |           |         |          |         |
|----|---|-----------|---------|----------|---------|
| 19 | A | 1162.6956 | 2.6475  | 44.1684  | 3.6814  |
| 20 | A | 1181.3509 | 1.9510  | 328.7808 | 1.0139  |
| 21 | A | 1209.4474 | 2.0575  | 54.1961  | 0.5538  |
| 22 | A | 1284.8365 | 3.5129  | 179.3956 | 1.6341  |
| 23 | A | 1376.8227 | 4.9028  | 0.9305   | 0.8091  |
| 24 | A | 1434.2050 | 13.5132 | 8.4008   | 13.1030 |
| 25 | A | 1481.7944 | 10.8221 | 82.6946  | 0.1756  |
| 26 | A | 1543.9313 | 10.7057 | 718.8700 | 1.8711  |
| 27 | A | 1670.6789 | 12.8858 | 0.2771   | 8.2194  |
| 28 | A | 1693.8307 | 16.2712 | 32.3702  | 6.8662  |
| 29 | A | 3225.5409 | 6.7048  | 2.7587   | 95.5138 |
| 30 | A | 3814.4836 | 9.1296  | 123.2563 | 96.8505 |

py-15\_A\_blyp

| NM# | Symm | Wavenumber | Force Const | IR Intens | Raman Activ |
|-----|------|------------|-------------|-----------|-------------|
| 1   | A    | 108.1832   | 0.0942      | 0.3220    | 0.0888      |
| 2   | A    | 190.4932   | 0.2365      | 0.6408    | 0.3538      |
| 3   | A    | 272.4254   | 0.6144      | 1.8274    | 0.9061      |
| 4   | A    | 283.0544   | 0.4046      | 0.7750    | 1.4960      |
| 5   | A    | 293.9705   | 0.5765      | 1.8111    | 0.1467      |
| 6   | A    | 339.1127   | 0.6326      | 7.2805    | 0.0690      |
| 7   | A    | 412.7026   | 0.2871      | 33.3314   | 1.6540      |
| 8   | A    | 437.6891   | 1.3368      | 1.1587    | 4.7508      |
| 9   | A    | 445.5094   | 0.3150      | 25.3790   | 1.4347      |
| 10  | A    | 480.8045   | 0.2691      | 59.3443   | 1.2371      |
| 11  | A    | 495.8757   | 1.7034      | 6.3762    | 15.1590     |
| 12  | A    | 624.9322   | 1.2428      | 16.8234   | 1.6349      |
| 13  | A    | 658.3507   | 2.8987      | 1.4467    | 0.3140      |
| 14  | A    | 662.7581   | 3.8742      | 19.0865   | 1.2593      |
| 15  | A    | 689.3475   | 2.5887      | 9.0997    | 0.7169      |
| 16  | A    | 727.0302   | 2.8008      | 12.9739   | 26.0707     |
| 17  | A    | 851.2018   | 0.5861      | 26.3600   | 0.2006      |
| 18  | A    | 858.2860   | 1.9829      | 87.6616   | 0.3537      |
| 19  | A    | 1083.6739  | 4.8037      | 11.4561   | 5.0871      |
| 20  | A    | 1125.6542  | 1.9069      | 329.3099  | 1.8260      |
| 21  | A    | 1158.0659  | 1.6039      | 123.0771  | 0.2756      |
| 22  | A    | 1227.5306  | 2.4659      | 126.3180  | 2.1704      |
| 23  | A    | 1326.4575  | 4.6707      | 6.2192    | 0.3008      |
| 24  | A    | 1338.7329  | 11.1498     | 13.6373   | 11.9409     |
| 25  | A    | 1395.7257  | 7.6854      | 99.2445   | 0.3989      |
| 26  | A    | 1446.5204  | 7.8384      | 594.0327  | 1.6912      |
| 27  | A    | 1569.3104  | 9.9660      | 2.0995    | 9.5658      |
| 28  | A    | 1598.3302  | 13.3242     | 24.4467   | 4.1038      |
| 29  | A    | 3138.7589  | 6.3411      | 1.9022    | 105.2696    |
| 30  | A    | 3636.1987  | 8.2947      | 95.0136   | 120.5599    |

py-15\_A\_bp86

| NM# | Symm | Wavenumber | Force Const | IR Intens | Raman Activ |
|-----|------|------------|-------------|-----------|-------------|
| 1   | A    | 107.9057   | 0.0937      | 0.3078    | 0.0856      |
| 2   | A    | 191.7568   | 0.2395      | 0.3587    | 0.3463      |
| 3   | A    | 270.7749   | 0.5901      | 1.9193    | 0.8769      |
| 4   | A    | 284.6809   | 0.4063      | 0.8385    | 1.4656      |
| 5   | A    | 293.1126   | 0.5751      | 1.8609    | 0.1190      |
| 6   | A    | 341.7878   | 0.6442      | 7.3586    | 0.0606      |
| 7   | A    | 415.7487   | 0.2853      | 33.8201   | 1.6350      |
| 8   | A    | 437.0705   | 1.3045      | 1.3619    | 4.6120      |
| 9   | A    | 446.8530   | 0.3716      | 17.3276   | 1.2349      |
| 10  | A    | 484.7204   | 0.2513      | 66.1750   | 1.4050      |
| 11  | A    | 496.8194   | 1.6829      | 6.5818    | 13.8200     |
| 12  | A    | 627.0865   | 1.2334      | 17.3467   | 1.6795      |
| 13  | A    | 657.4020   | 2.8953      | 1.5256    | 0.3168      |
| 14  | A    | 668.1360   | 3.9188      | 16.1881   | 1.3969      |
| 15  | A    | 686.3539   | 2.7350      | 8.2252    | 0.6038      |
| 16  | A    | 731.2319   | 2.8321      | 11.6298   | 26.6367     |
| 17  | A    | 841.7799   | 0.5666      | 28.2961   | 0.2151      |
| 18  | A    | 869.8220   | 1.8306      | 72.9631   | 0.3961      |
| 19  | A    | 1105.0865  | 3.3293      | 24.5869   | 4.9043      |
| 20  | A    | 1133.3007  | 1.8482      | 322.6757  | 1.2760      |
| 21  | A    | 1161.7224  | 1.7431      | 86.9820   | 0.4512      |
| 22  | A    | 1239.1727  | 2.4351      | 151.4755  | 2.0782      |
| 23  | A    | 1354.2309  | 6.2546      | 1.3798    | 0.2339      |
| 24  | A    | 1366.1797  | 11.4733     | 14.4888   | 11.5466     |
| 25  | A    | 1414.9649  | 8.8591      | 82.8437   | 0.3232      |
| 26  | A    | 1469.7495  | 9.0184      | 651.9922  | 1.4311      |
| 27  | A    | 1591.5896  | 11.1734     | 1.2467    | 8.9262      |
| 28  | A    | 1619.3775  | 14.2938     | 25.3361   | 4.4033      |
| 29  | A    | 3141.2590  | 6.3534      | 2.3335    | 104.6982    |
| 30  | A    | 3653.0747  | 8.3703      | 97.0766   | 118.4515    |

py-15\_A\_bpw91

| NM# | Symm | Wavenumber | Force Const | IR Intens | Raman Activ |
|-----|------|------------|-------------|-----------|-------------|
| 1   | A    | 107.7451   | 0.0934      | 0.3122    | 0.0843      |
| 2   | A    | 192.6246   | 0.2413      | 0.3926    | 0.3410      |
| 3   | A    | 272.2827   | 0.5976      | 1.9006    | 0.8704      |
| 4   | A    | 285.5238   | 0.4083      | 0.8363    | 1.4540      |
| 5   | A    | 294.9465   | 0.5821      | 1.8715    | 0.1177      |
| 6   | A    | 343.0162   | 0.6502      | 7.3250    | 0.0610      |
| 7   | A    | 418.2691   | 0.2802      | 35.1626   | 1.5950      |
| 8   | A    | 437.9145   | 1.3140      | 1.3439    | 4.5696      |
| 9   | A    | 449.2054   | 0.3801      | 16.8418   | 1.2458      |
| 10  | A    | 486.6787   | 0.2566      | 65.4612   | 1.3539      |

|    |   |           |         |          |          |
|----|---|-----------|---------|----------|----------|
| 11 | A | 497.9978  | 1.6893  | 6.6086   | 13.6641  |
| 12 | A | 629.9301  | 1.2488  | 17.2799  | 1.6461   |
| 13 | A | 662.5459  | 2.9446  | 1.3993   | 0.2901   |
| 14 | A | 669.4273  | 3.9292  | 16.2152  | 1.3781   |
| 15 | A | 692.1113  | 2.7194  | 8.5295   | 0.6183   |
| 16 | A | 732.8534  | 2.8470  | 11.5470  | 26.3978  |
| 17 | A | 847.6781  | 0.5766  | 27.7301  | 0.2131   |
| 18 | A | 872.5985  | 1.8650  | 75.1001  | 0.3760   |
| 19 | A | 1107.7207 | 3.5579  | 22.0433  | 4.8052   |
| 20 | A | 1136.9473 | 1.8709  | 325.7474 | 1.2958   |
| 21 | A | 1165.7643 | 1.7121  | 92.8384  | 0.3715   |
| 22 | A | 1242.4369 | 2.4034  | 148.7292 | 2.0801   |
| 23 | A | 1359.2970 | 6.3049  | 1.1135   | 0.2393   |
| 24 | A | 1369.3499 | 11.4520 | 14.8090  | 11.3201  |
| 25 | A | 1419.5594 | 8.9152  | 81.0545  | 0.2942   |
| 26 | A | 1474.8653 | 9.0397  | 650.5740 | 1.4121   |
| 27 | A | 1597.7496 | 11.2332 | 1.0257   | 8.8732   |
| 28 | A | 1624.5388 | 14.4430 | 25.5981  | 4.6503   |
| 29 | A | 3157.3326 | 6.4185  | 2.1404   | 102.7706 |
| 30 | A | 3675.7133 | 8.4748  | 97.1482  | 115.2799 |

py-15\_A\_camb3lyp

| NM# | Symm | Wavenumber | Force Const | IR Intens | Raman Activ |
|-----|------|------------|-------------|-----------|-------------|
| 1   | A    | 118.6078   | 0.1124      | 0.3247    | 0.0591      |
| 2   | A    | 204.3257   | 0.2690      | 0.8366    | 0.2879      |
| 3   | A    | 284.2212   | 0.6591      | 2.1061    | 0.6259      |
| 4   | A    | 303.4397   | 0.4534      | 1.0198    | 1.4304      |
| 5   | A    | 306.9100   | 0.6214      | 1.8363    | 0.0990      |
| 6   | A    | 358.9957   | 0.7057      | 8.5930    | 0.0512      |
| 7   | A    | 431.3754   | 0.1955      | 67.7172   | 1.2809      |
| 8   | A    | 460.6063   | 1.4391      | 1.3595    | 4.2159      |
| 9   | A    | 470.6241   | 0.4511      | 23.0371   | 2.1062      |
| 10  | A    | 503.5394   | 0.3899      | 42.1490   | 0.6582      |
| 11  | A    | 523.3989   | 1.8693      | 6.0753    | 10.5922     |
| 12  | A    | 658.2928   | 1.3268      | 20.9913   | 1.3228      |
| 13  | A    | 705.9755   | 4.3302      | 17.8481   | 1.0987      |
| 14  | A    | 717.8796   | 3.5562      | 0.6616    | 0.1725      |
| 15  | A    | 756.2715   | 2.8482      | 15.3762   | 0.8689      |
| 16  | A    | 772.4984   | 3.1318      | 10.8599   | 25.0824     |
| 17  | A    | 917.3037   | 1.8941      | 68.1179   | 0.3009      |
| 18  | A    | 918.9133   | 0.7014      | 27.7046   | 0.2332      |
| 19  | A    | 1174.7527  | 2.5866      | 57.1341   | 3.5801      |
| 20  | A    | 1191.5804  | 1.9193      | 337.9007  | 1.2667      |
| 21  | A    | 1217.5306  | 2.0990      | 26.6408   | 0.5746      |
| 22  | A    | 1282.7078  | 7.7777      | 189.6994  | 1.5187      |
| 23  | A    | 1351.7136  | 3.0028      | 8.0847    | 1.0093      |
| 24  | A    | 1452.2046  | 13.8829     | 7.3048    | 14.3125     |



|    |   |           |         |          |         |
|----|---|-----------|---------|----------|---------|
| 25 | A | 1500.6726 | 11.4384 | 82.2444  | 0.1887  |
| 26 | A | 1562.9896 | 11.0090 | 732.6396 | 2.5789  |
| 27 | A | 1696.7999 | 13.5902 | 0.3524   | 8.8117  |
| 28 | A | 1720.1543 | 16.9492 | 37.3550  | 7.9213  |
| 29 | A | 3235.5579 | 6.7512  | 3.9944   | 92.3896 |
| 30 | A | 3828.8557 | 9.1999  | 141.0667 | 88.2407 |

py-15\_A\_m062x

| NM# | Symm | Wavenumber | Force Const | IR Intens | Raman Activ |
|-----|------|------------|-------------|-----------|-------------|
| 1   | A    | 119.2852   | 0.1139      | 0.3064    | 0.0586      |
| 2   | A    | 204.5545   | 0.2657      | 0.6181    | 0.3084      |
| 3   | A    | 283.1900   | 0.6575      | 2.0823    | 0.5248      |
| 4   | A    | 304.2852   | 0.4595      | 0.8234    | 1.4194      |
| 5   | A    | 306.2581   | 0.6208      | 1.5497    | 0.0936      |
| 6   | A    | 361.0723   | 0.7214      | 8.5979    | 0.0546      |
| 7   | A    | 420.1362   | 0.1463      | 91.1469   | 1.0834      |
| 8   | A    | 458.8011   | 1.4188      | 1.4114    | 4.2822      |
| 9   | A    | 465.9717   | 0.6420      | 13.3071   | 2.7186      |
| 10  | A    | 493.5897   | 0.4521      | 29.2539   | 0.5364      |
| 11  | A    | 521.2925   | 1.8440      | 5.6293    | 9.8076      |
| 12  | A    | 657.3408   | 1.3239      | 20.2388   | 1.2877      |
| 13  | A    | 707.1049   | 4.2806      | 16.7683   | 1.0107      |
| 14  | A    | 708.4481   | 3.5091      | 0.5907    | 0.1612      |
| 15  | A    | 745.0150   | 3.0998      | 12.7877   | 0.8094      |
| 16  | A    | 771.9521   | 3.1318      | 9.3143    | 25.3853     |
| 17  | A    | 907.8960   | 0.6669      | 30.8239   | 0.1977      |
| 18  | A    | 925.4005   | 1.8126      | 58.3046   | 0.3761      |
| 19  | A    | 1186.6216  | 1.6846      | 68.2036   | 2.2508      |
| 20  | A    | 1197.2091  | 1.9363      | 320.5896  | 1.8472      |
| 21  | A    | 1224.5109  | 3.7594      | 8.5651    | 1.0319      |
| 22  | A    | 1288.0534  | 8.9312      | 183.0102  | 1.3184      |
| 23  | A    | 1353.3523  | 2.8384      | 14.0009   | 0.7776      |
| 24  | A    | 1471.5377  | 14.5017     | 3.3900    | 15.3513     |
| 25  | A    | 1512.6779  | 12.3800     | 92.0398   | 0.2453      |
| 26  | A    | 1574.4216  | 11.9033     | 750.9304  | 2.7170      |
| 27  | A    | 1704.9400  | 14.0076     | 0.4441    | 7.2778      |
| 28  | A    | 1725.1663  | 17.2243     | 34.5323   | 7.9504      |
| 29  | A    | 3243.7241  | 6.7850      | 5.4585    | 90.0469     |
| 30  | A    | 3855.4491  | 9.3299      | 149.3127  | 90.2659     |

py-15\_A\_mn15

| NM# | Symm | Wavenumber | Force Const | IR Intens | Raman Activ |
|-----|------|------------|-------------|-----------|-------------|
| 1   | A    | 116.7294   | 0.1083      | 0.3320    | 0.0628      |
| 2   | A    | 202.1152   | 0.2626      | 0.7867    | 0.2909      |

|    |   |           |         |          |          |
|----|---|-----------|---------|----------|----------|
| 3  | A | 275.4899  | 0.6018  | 2.3170   | 0.5777   |
| 4  | A | 299.2408  | 0.5822  | 1.6894   | 0.0873   |
| 5  | A | 300.5863  | 0.4402  | 1.1054   | 1.4454   |
| 6  | A | 354.6167  | 0.6884  | 9.3920   | 0.0461   |
| 7  | A | 425.9579  | 0.1874  | 67.5855  | 1.2851   |
| 8  | A | 447.1203  | 1.3121  | 1.7131   | 4.2440   |
| 9  | A | 465.6109  | 0.5055  | 15.5236  | 1.9610   |
| 10 | A | 498.0648  | 0.3596  | 48.9370  | 0.9053   |
| 11 | A | 509.7616  | 1.7234  | 6.5513   | 9.7187   |
| 12 | A | 646.5293  | 1.2569  | 20.4653  | 1.4363   |
| 13 | A | 696.7429  | 4.1714  | 14.3932  | 1.1512   |
| 14 | A | 707.1678  | 3.4551  | 0.6434   | 0.1664   |
| 15 | A | 743.2371  | 2.8891  | 14.3101  | 0.7224   |
| 16 | A | 762.5760  | 3.0605  | 9.1422   | 26.7767  |
| 17 | A | 907.2955  | 0.6765  | 28.4423  | 0.3258   |
| 18 | A | 914.5689  | 1.6344  | 50.7092  | 0.4747   |
| 19 | A | 1169.9454 | 1.6064  | 384.4841 | 2.4157   |
| 20 | A | 1174.8368 | 1.6146  | 20.3786  | 1.3302   |
| 21 | A | 1217.6715 | 3.9966  | 14.6521  | 1.3053   |
| 22 | A | 1282.2291 | 5.8880  | 193.3028 | 1.1979   |
| 23 | A | 1344.1685 | 4.3061  | 1.0436   | 0.9530   |
| 24 | A | 1465.6131 | 14.2735 | 4.8433   | 14.7143  |
| 25 | A | 1501.8198 | 13.0194 | 85.1511  | 0.1177   |
| 26 | A | 1572.3626 | 12.3149 | 790.0202 | 2.2333   |
| 27 | A | 1694.0927 | 14.5535 | 1.4761   | 8.1410   |
| 28 | A | 1715.2425 | 17.5171 | 36.4439  | 9.4659   |
| 29 | A | 3252.8421 | 6.8193  | 1.8108   | 101.4713 |
| 30 | A | 3862.2133 | 9.3604  | 140.0074 | 95.9173  |

py-15\_A\_mp2

| NM# | Symm | Wavenumber | Force Const | IR Intens | Raman Activ |
|-----|------|------------|-------------|-----------|-------------|
| 1   | A    | 110.5282   | 0.1063      | 0.0548    | 0.0455      |
| 2   | A    | 199.9722   | 0.2306      | 0.0868    | 0.3172      |
| 3   | A    | 282.8431   | 0.6338      | 2.0513    | 0.6140      |
| 4   | A    | 288.5157   | 0.4021      | 0.0366    | 1.3296      |
| 5   | A    | 306.0500   | 0.6454      | 1.3654    | 0.0635      |
| 6   | A    | 354.0374   | 0.7002      | 8.1678    | 0.0533      |
| 7   | A    | 365.6881   | 0.0874      | 124.2516  | 0.6334      |
| 8   | A    | 440.9134   | 0.7018      | 3.0565    | 0.3858      |
| 9   | A    | 448.6293   | 1.1224      | 1.6830    | 2.9842      |
| 10  | A    | 451.6936   | 1.3704      | 1.6187    | 4.3684      |
| 11  | A    | 512.9340   | 1.8152      | 5.2929    | 10.7821     |
| 12  | A    | 547.3105   | 1.9228      | 3.5684    | 1.1481      |
| 13  | A    | 629.5833   | 2.8301      | 0.0833    | 0.0084      |
| 14  | A    | 648.2061   | 1.3378      | 18.3511   | 1.5067      |
| 15  | A    | 704.6820   | 4.3459      | 14.3877   | 2.9079      |
| 16  | A    | 751.9599   | 2.9869      | 13.2502   | 24.4327     |

|    |   |           |         |          |         |
|----|---|-----------|---------|----------|---------|
| 17 | A | 852.3948  | 0.5386  | 36.7973  | 0.0274  |
| 18 | A | 905.4392  | 1.9578  | 62.3773  | 0.4267  |
| 19 | A | 1168.2363 | 3.3880  | 7.2965   | 1.9211  |
| 20 | A | 1183.6192 | 1.9313  | 314.7575 | 1.6765  |
| 21 | A | 1216.0189 | 2.0151  | 74.1823  | 0.1656  |
| 22 | A | 1303.1286 | 2.3192  | 145.0454 | 1.3666  |
| 23 | A | 1430.8519 | 13.2386 | 4.5872   | 10.8637 |
| 24 | A | 1452.2011 | 9.9256  | 18.7399  | 7.8176  |
| 25 | A | 1478.2241 | 9.5763  | 85.6505  | 0.2774  |
| 26 | A | 1543.2412 | 10.7335 | 694.5266 | 3.2376  |
| 27 | A | 1664.9793 | 13.0780 | 4.4452   | 8.6643  |
| 28 | A | 1691.3714 | 15.9207 | 15.9662  | 5.3908  |
| 29 | A | 3251.9918 | 6.8180  | 3.6225   | 93.0678 |
| 30 | A | 3827.0351 | 9.1906  | 128.9766 | 93.2726 |

py-15\_A\_o3lyp

| NM# | Symm | Wavenumber | Force Const | IR Intens | Raman Activ |
|-----|------|------------|-------------|-----------|-------------|
| 1   | A    | 112.2020   | 0.1009      | 0.3117    | 0.0719      |
| 2   | A    | 200.1517   | 0.2594      | 0.4786    | 0.3264      |
| 3   | A    | 282.9959   | 0.6509      | 1.9062    | 0.6951      |
| 4   | A    | 296.0932   | 0.4352      | 0.8688    | 1.4884      |
| 5   | A    | 306.6497   | 0.6253      | 1.8513    | 0.1089      |
| 6   | A    | 354.3374   | 0.6989      | 7.4189    | 0.0606      |
| 7   | A    | 430.0817   | 0.2242      | 52.1483   | 1.4094      |
| 8   | A    | 449.3160   | 1.3879      | 1.2764    | 4.3354      |
| 9   | A    | 462.6933   | 0.4219      | 19.0582   | 1.8745      |
| 10  | A    | 494.4986   | 0.3248      | 51.1192   | 0.9879      |
| 11  | A    | 511.7259   | 1.7787      | 6.2406    | 12.2139     |
| 12  | A    | 650.6765   | 1.3340      | 18.0960   | 1.4486      |
| 13  | A    | 689.4534   | 4.1410      | 15.9219   | 1.2730      |
| 14  | A    | 694.7619   | 3.2560      | 1.2543    | 0.2691      |
| 15  | A    | 726.4508   | 2.7383      | 10.7026   | 0.8543      |
| 16  | A    | 750.8024   | 2.9668      | 11.2815   | 25.2030     |
| 17  | A    | 883.6309   | 0.6397      | 26.5307   | 0.1975      |
| 18  | A    | 900.6287   | 1.9338      | 71.9792   | 0.3679      |
| 19  | A    | 1150.5774  | 3.2347      | 31.0742   | 4.1564      |
| 20  | A    | 1173.0168  | 2.0108      | 324.6465  | 1.3259      |
| 21  | A    | 1200.0942  | 1.8237      | 72.8339   | 0.3820      |
| 22  | A    | 1275.9266  | 2.8763      | 171.6703  | 1.8512      |
| 23  | A    | 1380.3888  | 5.3792      | 1.8395    | 0.6590      |
| 24  | A    | 1417.0923  | 13.1199     | 9.9286    | 13.3701     |
| 25  | A    | 1466.9829  | 10.1663     | 82.3068   | 0.1853      |
| 26  | A    | 1527.1955  | 10.2304     | 709.1932  | 1.6121      |
| 27  | A    | 1653.7105  | 12.3191     | 0.5669    | 7.3804      |
| 28  | A    | 1675.6215  | 15.8553     | 28.9601   | 7.1139      |
| 29  | A    | 3222.6974  | 6.6915      | 1.9855    | 99.4989     |
| 30  | A    | 3811.8777  | 9.1175      | 112.7603  | 101.7558    |

py-15\_A\_pbe0

| NM# | Symm | Wavenumber | Force Const | IR Intens | Raman Activ |
|-----|------|------------|-------------|-----------|-------------|
| 1   | A    | 116.0964   | 0.1079      | 0.3128    | 0.0633      |
| 2   | A    | 203.4963   | 0.2671      | 0.4613    | 0.3051      |
| 3   | A    | 282.3582   | 0.6375      | 2.0927    | 0.6298      |
| 4   | A    | 302.0479   | 0.4498      | 0.9892    | 1.4397      |
| 5   | A    | 305.9385   | 0.6226      | 1.7822    | 0.0907      |
| 6   | A    | 359.3403   | 0.7130      | 8.1501    | 0.0518      |
| 7   | A    | 432.3674   | 0.2110      | 59.3190   | 1.3846      |
| 8   | A    | 456.2584   | 1.3991      | 1.4824    | 4.1917      |
| 9   | A    | 468.7240   | 0.4640      | 18.2439   | 1.9470      |
| 10  | A    | 501.2223   | 0.3462      | 49.8770   | 0.8912      |
| 11  | A    | 520.3516   | 1.8291      | 6.3269    | 10.7345     |
| 12  | A    | 657.4633   | 1.3288      | 19.6787   | 1.4169      |
| 13  | A    | 704.0637   | 4.3047      | 15.6260   | 1.2355      |
| 14  | A    | 706.9103   | 3.4256      | 0.9383    | 0.2166      |
| 15  | A    | 740.2994   | 2.9616      | 12.2742   | 0.8182      |
| 16  | A    | 767.5415   | 3.0991      | 10.4600   | 25.3316     |
| 17  | A    | 897.3056   | 0.6558      | 28.9192   | 0.1860      |
| 18  | A    | 918.2721   | 1.8327      | 62.3880   | 0.3657      |
| 19  | A    | 1174.8919  | 2.0552      | 64.7517   | 3.3264      |
| 20  | A    | 1192.9326  | 1.9934      | 312.4779  | 0.8675      |
| 21  | A    | 1219.8547  | 2.5649      | 39.6862   | 0.9289      |
| 22  | A    | 1297.2934  | 3.7855      | 186.7049  | 1.5447      |
| 23  | A    | 1387.1280  | 5.0226      | 1.4967    | 0.8787      |
| 24  | A    | 1455.9463  | 13.9357     | 7.9636    | 13.9835     |
| 25  | A    | 1501.0367  | 11.5395     | 83.3362   | 0.1119      |
| 26  | A    | 1564.1784  | 11.4117     | 742.1562  | 1.9205      |
| 27  | A    | 1691.6047  | 13.6068     | 0.3014    | 7.7775      |
| 28  | A    | 1713.9897  | 16.9011     | 33.5453   | 7.4460      |
| 29  | A    | 3238.1326  | 6.7592      | 3.1781    | 95.0977     |
| 30  | A    | 3842.8767  | 9.2660      | 128.7101  | 93.8287     |

py-15\_A\_pbe

| NM# | Symm | Wavenumber | Force Const | IR Intens | Raman Activ |
|-----|------|------------|-------------|-----------|-------------|
| 1   | A    | 108.1938   | 0.0941      | 0.3109    | 0.0859      |
| 2   | A    | 192.2085   | 0.2407      | 0.3460    | 0.3483      |
| 3   | A    | 271.3951   | 0.5946      | 1.8721    | 0.8469      |
| 4   | A    | 285.9617   | 0.4090      | 0.8447    | 1.4577      |
| 5   | A    | 294.1573   | 0.5773      | 1.9210    | 0.1215      |
| 6   | A    | 343.3548   | 0.6504      | 7.3199    | 0.0620      |
| 7   | A    | 417.6796   | 0.2896      | 33.3918   | 1.6178      |
| 8   | A    | 437.7961   | 1.3046      | 1.3987    | 4.5357      |

|    |   |           |         |          |          |
|----|---|-----------|---------|----------|----------|
| 9  | A | 448.4777  | 0.3802  | 16.2497  | 1.2400   |
| 10 | A | 487.6253  | 0.2504  | 67.2171  | 1.4315   |
| 11 | A | 497.8842  | 1.6831  | 6.5877   | 13.7009  |
| 12 | A | 629.1338  | 1.2353  | 17.3460  | 1.6585   |
| 13 | A | 663.8704  | 2.9351  | 1.5021   | 0.3143   |
| 14 | A | 670.1670  | 3.9320  | 15.8727  | 1.2087   |
| 15 | A | 693.4781  | 2.6745  | 8.6654   | 0.6755   |
| 16 | A | 734.2166  | 2.8597  | 11.0103  | 26.3970  |
| 17 | A | 844.5694  | 0.5758  | 27.7103  | 0.2216   |
| 18 | A | 874.6631  | 1.8058  | 71.1609  | 0.4239   |
| 19 | A | 1110.4185 | 2.9398  | 31.2719  | 4.8135   |
| 20 | A | 1137.6323 | 1.8541  | 315.9841 | 1.2190   |
| 21 | A | 1163.8406 | 1.8338  | 81.7123  | 0.6261   |
| 22 | A | 1243.5616 | 2.4288  | 154.4353 | 2.0607   |
| 23 | A | 1366.3278 | 6.8258  | 1.0489   | 0.3604   |
| 24 | A | 1375.6165 | 11.4045 | 16.6545  | 11.8262  |
| 25 | A | 1423.6081 | 9.2661  | 77.0681  | 0.2793   |
| 26 | A | 1479.3008 | 9.3750  | 665.8879 | 1.3523   |
| 27 | A | 1601.9060 | 11.6338 | 0.6939   | 8.5459   |
| 28 | A | 1628.7412 | 14.7156 | 25.5158  | 5.0511   |
| 29 | A | 3151.0606 | 6.3935  | 2.6692   | 104.6343 |
| 30 | A | 3668.0453 | 8.4391  | 98.7977  | 117.6555 |

py-15\_A\_rtpss

| NM# | Symm | Wavenumber | Force Const | IR Intens | Raman Activ |
|-----|------|------------|-------------|-----------|-------------|
| 1   | A    | 110.7286   | 0.0987      | 0.3053    | 0.0799      |
| 2   | A    | 193.7192   | 0.2451      | 0.4448    | 0.3384      |
| 3   | A    | 265.0012   | 0.5585      | 2.0175    | 0.8076      |
| 4   | A    | 288.1753   | 0.5589      | 1.7104    | 0.1045      |
| 5   | A    | 289.9705   | 0.4236      | 0.8265    | 1.4544      |
| 6   | A    | 342.7714   | 0.6477      | 7.6604    | 0.0501      |
| 7   | A    | 418.7903   | 0.3093      | 30.2356   | 1.6826      |
| 8   | A    | 436.2065   | 1.2628      | 1.6099    | 4.4400      |
| 9   | A    | 448.8215   | 0.3993      | 13.5314   | 1.0610      |
| 10  | A    | 489.0804   | 0.2399      | 73.0018   | 1.5012      |
| 11  | A    | 498.2446   | 1.6855      | 6.5890    | 13.2595     |
| 12  | A    | 626.4381   | 1.2534      | 17.2338   | 1.7165      |
| 13  | A    | 658.9200   | 2.9434      | 1.4872    | 0.3283      |
| 14  | A    | 674.9574   | 4.0247      | 16.2616   | 1.6371      |
| 15  | A    | 687.2258   | 2.8933      | 7.4322    | 0.6141      |
| 16  | A    | 737.6365   | 2.8958      | 12.4931   | 26.6788     |
| 17  | A    | 865.6881   | 0.5891      | 26.8899   | 0.1858      |
| 18  | A    | 877.0407   | 1.9244      | 76.2013   | 0.4021      |
| 19  | A    | 1115.2058  | 4.2115      | 17.5894   | 4.9319      |
| 20  | A    | 1148.9875  | 2.0058      | 322.1895  | 1.6131      |
| 21  | A    | 1183.3747  | 1.6903      | 113.8951  | 0.2036      |
| 22  | A    | 1255.1212  | 2.3425      | 128.8395  | 2.1746      |

|    |   |           |         |          |          |
|----|---|-----------|---------|----------|----------|
| 23 | A | 1367.0228 | 6.3508  | 2.8180   | 0.2231   |
| 24 | A | 1382.6274 | 11.6552 | 12.9000  | 11.7530  |
| 25 | A | 1433.3357 | 8.7318  | 87.5913  | 0.4409   |
| 26 | A | 1488.0390 | 9.0253  | 651.9173 | 1.6347   |
| 27 | A | 1613.9891 | 11.1401 | 2.6598   | 9.4715   |
| 28 | A | 1648.2633 | 14.5509 | 25.7785  | 3.1603   |
| 29 | A | 3182.2875 | 6.5214  | 0.6637   | 107.8474 |
| 30 | A | 3664.2069 | 8.4220  | 87.1975  | 113.7999 |

py-15\_A\_tpssh

| NM# | Symm | Wavenumber | Force Const | IR Intens | Raman Activ |
|-----|------|------------|-------------|-----------|-------------|
| 1   | A    | 113.2453   | 0.1030      | 0.3125    | 0.0728      |
| 2   | A    | 198.9174   | 0.2569      | 0.5543    | 0.3222      |
| 3   | A    | 272.9933   | 0.5906      | 2.1071    | 0.7477      |
| 4   | A    | 295.9193   | 0.4375      | 0.8732    | 1.4575      |
| 5   | A    | 296.2134   | 0.5864      | 1.7000    | 0.0996      |
| 6   | A    | 349.5681   | 0.6744      | 8.0269    | 0.0503      |
| 7   | A    | 427.4577   | 0.2590      | 42.7579   | 1.5786      |
| 8   | A    | 445.8926   | 1.3310      | 1.5313    | 4.3366      |
| 9   | A    | 460.1127   | 0.4014      | 18.7706   | 1.4659      |
| 10  | A    | 494.6585   | 0.2904      | 61.5405   | 1.1327      |
| 11  | A    | 508.6939   | 1.7600      | 6.4449    | 12.2847     |
| 12  | A    | 640.6801   | 1.3028      | 18.2732   | 1.5675      |
| 13  | A    | 682.3371   | 3.1808      | 1.1824    | 0.2616      |
| 14  | A    | 688.3700   | 4.1772      | 16.3696   | 1.6307      |
| 15  | A    | 713.0795   | 2.9465      | 9.5643    | 0.7168      |
| 16  | A    | 750.0277   | 2.9724      | 12.5042   | 25.9270     |
| 17  | A    | 887.0376   | 0.6274      | 27.9017   | 0.1661      |
| 18  | A    | 893.7584   | 1.9497      | 73.4220   | 0.3546      |
| 19  | A    | 1141.9929  | 4.0312      | 19.4378   | 4.2603      |
| 20  | A    | 1167.6370  | 1.9728      | 337.0405  | 1.5200      |
| 21  | A    | 1203.1599  | 1.7381      | 90.6472   | 0.1881      |
| 22  | A    | 1272.7055  | 2.8993      | 151.3213  | 1.8480      |
| 23  | A    | 1370.3923  | 5.0885      | 1.3417    | 0.6121      |
| 24  | A    | 1408.6135  | 12.9443     | 9.8221    | 12.4906     |
| 25  | A    | 1458.6093  | 9.6046      | 88.4167   | 0.3350      |
| 26  | A    | 1517.4600  | 9.6942      | 686.5643  | 1.8560      |
| 27  | A    | 1644.6691  | 11.7383     | 1.3314    | 9.1612      |
| 28  | A    | 1673.2219  | 15.2551     | 29.6301   | 4.5111      |
| 29  | A    | 3219.3032  | 6.6769      | 1.6888    | 101.8764    |
| 30  | A    | 3749.9223  | 8.8226      | 105.9083  | 104.3328    |

py-15\_A\_wb97xd

| NM# | Symm | Wavenumber | Force Const | IR Intens | Raman Activ |
|-----|------|------------|-------------|-----------|-------------|
|-----|------|------------|-------------|-----------|-------------|

|    |   |           |         |          |         |
|----|---|-----------|---------|----------|---------|
| 1  | A | 117.0709  | 0.1097  | 0.3080   | 0.0574  |
| 2  | A | 204.8000  | 0.2694  | 0.5760   | 0.2876  |
| 3  | A | 286.0873  | 0.6559  | 2.1478   | 0.6284  |
| 4  | A | 302.5218  | 0.4515  | 0.9955   | 1.4317  |
| 5  | A | 309.1293  | 0.6404  | 1.7909   | 0.0839  |
| 6  | A | 360.4281  | 0.7187  | 8.1877   | 0.0513  |
| 7  | A | 432.0980  | 0.1892  | 69.5249  | 1.2520  |
| 8  | A | 459.0918  | 1.4418  | 1.3192   | 4.2564  |
| 9  | A | 470.8909  | 0.5035  | 17.7978  | 2.0902  |
| 10 | A | 500.7018  | 0.3801  | 43.4713  | 0.7313  |
| 11 | A | 521.8892  | 1.8553  | 6.1204   | 10.5184 |
| 12 | A | 661.1272  | 1.3583  | 20.3784  | 1.3307  |
| 13 | A | 704.3613  | 4.3069  | 16.9615  | 1.3377  |
| 14 | A | 711.4601  | 3.4960  | 0.7391   | 0.1863  |
| 15 | A | 746.4754  | 2.9874  | 13.3635  | 0.8106  |
| 16 | A | 767.7182  | 3.0879  | 10.9714  | 25.3810 |
| 17 | A | 910.3114  | 0.6764  | 29.1244  | 0.1915  |
| 18 | A | 918.1898  | 1.9357  | 68.5734  | 0.3058  |
| 19 | A | 1175.3855 | 2.6307  | 55.5220  | 3.5877  |
| 20 | A | 1195.9224 | 2.0216  | 330.4175 | 1.1099  |
| 21 | A | 1219.7978 | 2.0619  | 35.2723  | 0.4647  |
| 22 | A | 1285.3730 | 6.0849  | 196.9460 | 1.6767  |
| 23 | A | 1360.8958 | 3.1904  | 3.8815   | 1.0240  |
| 24 | A | 1450.4422 | 13.7513 | 8.8419   | 14.3810 |
| 25 | A | 1499.2783 | 11.0911 | 82.0132  | 0.1343  |
| 26 | A | 1562.8388 | 11.0419 | 738.7277 | 2.3747  |
| 27 | A | 1696.3129 | 13.3937 | 0.6042   | 7.9258  |
| 28 | A | 1717.8019 | 16.8622 | 36.3627  | 8.0833  |
| 29 | A | 3235.2686 | 6.7499  | 2.4131   | 92.5647 |
| 30 | A | 3870.9597 | 9.4036  | 130.4093 | 87.3287 |

-----

py-15\_A\_x3lyp

| NM# | Symm | Wavenumber | Force Const | IR Intens | Raman Activ |
|-----|------|------------|-------------|-----------|-------------|
| 1   | A    | 115.8203   | 0.1075      | 0.3223    | 0.0674      |
| 2   | A    | 201.2059   | 0.2616      | 0.7300    | 0.3149      |
| 3   | A    | 282.2970   | 0.6525      | 2.0336    | 0.6843      |
| 4   | A    | 298.6469   | 0.4440      | 0.8959    | 1.4769      |
| 5   | A    | 304.7642   | 0.6154      | 1.7238    | 0.1124      |
| 6   | A    | 354.6507   | 0.6914      | 8.1045    | 0.0575      |
| 7   | A    | 427.3486   | 0.2107      | 58.4940   | 1.4215      |
| 8   | A    | 455.1984   | 1.4192      | 1.2957    | 4.3417      |
| 9   | A    | 463.4493   | 0.3877      | 26.7969   | 2.1142      |
| 10  | A    | 496.6314   | 0.3696      | 42.9115   | 0.7222      |
| 11  | A    | 516.9298   | 1.8332      | 6.1297    | 11.9657     |
| 12  | A    | 651.6615   | 1.3218      | 19.1947   | 1.4139      |
| 13  | A    | 696.0432   | 4.2386      | 18.0036   | 1.2336      |
| 14  | A    | 700.4910   | 3.3558      | 1.0031    | 0.2314      |

|    |   |           |         |          |         |
|----|---|-----------|---------|----------|---------|
| 15 | A | 735.1780  | 2.8352  | 12.5835  | 0.8672  |
| 16 | A | 759.0653  | 3.0258  | 11.8277  | 25.2676 |
| 17 | A | 898.7872  | 0.6615  | 27.5259  | 0.1769  |
| 18 | A | 902.5310  | 1.9582  | 73.9845  | 0.3153  |
| 19 | A | 1153.3724 | 3.6131  | 27.1793  | 3.9417  |
| 20 | A | 1177.3997 | 1.9217  | 345.2500 | 1.4521  |
| 21 | A | 1206.7029 | 1.7849  | 62.1011  | 0.2893  |
| 22 | A | 1275.1312 | 4.1717  | 173.3745 | 1.6252  |
| 23 | A | 1357.0747 | 3.7352  | 2.9337   | 0.8828  |
| 24 | A | 1419.1934 | 13.2247 | 8.3803   | 13.6815 |
| 25 | A | 1470.0501 | 10.1666 | 86.9143  | 0.2612  |
| 26 | A | 1529.3864 | 9.9832  | 696.3094 | 2.1337  |
| 27 | A | 1657.0931 | 12.1473 | 0.2688   | 8.7348  |
| 28 | A | 1681.7178 | 15.6590 | 32.7598  | 6.4290  |
| 29 | A | 3218.5217 | 6.6744  | 2.6984   | 97.2289 |
| 30 | A | 3796.0009 | 9.0424  | 124.4508 | 98.9401 |

-----

py-15\_B\_b3lyp

| NM# | Symm | Wavenumber | Force Const | IR Intens | Raman Activ |
|-----|------|------------|-------------|-----------|-------------|
| 1   | A    | 116.0612   | 0.1104      | 0.2329    | 0.0800      |
| 2   | A    | 200.8637   | 0.2794      | 1.4981    | 0.1856      |
| 3   | A    | 283.9871   | 0.6420      | 3.9201    | 0.5314      |
| 4   | A    | 297.5231   | 0.3953      | 4.3296    | 1.3805      |
| 5   | A    | 305.9191   | 0.5351      | 5.0570    | 0.0630      |
| 6   | A    | 359.8330   | 0.8579      | 0.4686    | 0.2965      |
| 7   | A    | 412.0641   | 0.1120      | 114.6836  | 1.3491      |
| 8   | A    | 441.1589   | 1.2110      | 1.1516    | 2.7260      |
| 9   | A    | 458.1558   | 1.6514      | 0.3493    | 4.1016      |
| 10  | A    | 473.6714   | 0.5572      | 2.4895    | 0.0549      |
| 11  | A    | 515.9197   | 2.0616      | 2.0348    | 11.4440     |
| 12  | A    | 657.4657   | 1.2947      | 3.0606    | 2.2677      |
| 13  | A    | 689.6224   | 3.7025      | 15.9089   | 1.3289      |
| 14  | A    | 694.2959   | 3.1807      | 0.5477    | 0.0443      |
| 15  | A    | 722.6742   | 2.8302      | 11.7628   | 0.8872      |
| 16  | A    | 759.2058   | 3.0084      | 11.1678   | 25.9351     |
| 17  | A    | 887.6276   | 0.6366      | 30.9175   | 0.1598      |
| 18  | A    | 901.6241   | 2.5565      | 182.4265  | 0.1473      |
| 19  | A    | 1130.8611  | 3.5433      | 28.7318   | 4.0996      |
| 20  | A    | 1187.5365  | 2.6125      | 44.4101   | 0.3582      |
| 21  | A    | 1201.7316  | 1.4867      | 50.2686   | 0.5088      |
| 22  | A    | 1272.1256  | 3.0913      | 178.4828  | 1.0796      |
| 23  | A    | 1350.8920  | 3.8994      | 182.3812  | 2.0004      |
| 24  | A    | 1420.3641  | 11.2811     | 9.8194    | 11.3979     |
| 25  | A    | 1476.2732  | 8.8984      | 118.0692  | 1.0887      |
| 26  | A    | 1511.2576  | 9.4920      | 669.8517  | 0.7293      |
| 27  | A    | 1647.1486  | 13.5078     | 25.0993   | 2.8669      |
| 28  | A    | 1669.9808  | 15.9285     | 24.8300   | 12.0041     |



|    |   |           |        |          |         |
|----|---|-----------|--------|----------|---------|
| 29 | A | 3218.1883 | 6.6745 | 2.8412   | 96.3769 |
| 30 | A | 3805.1499 | 9.0918 | 120.4525 | 72.1399 |

py-15\_B\_m062x

| NM# | Symm | Wavenumber | Force Const | IR Intens | Raman Activ |
|-----|------|------------|-------------|-----------|-------------|
| 1   | A    | 120.3424   | 0.1180      | 0.2289    | 0.0705      |
| 2   | A    | 205.4077   | 0.2897      | 1.4465    | 0.1783      |
| 3   | A    | 286.6445   | 0.7216      | 2.7931    | 0.3597      |
| 4   | A    | 304.1945   | 0.3985      | 5.2572    | 1.3417      |
| 5   | A    | 312.0189   | 0.5310      | 5.9152    | 0.0817      |
| 6   | A    | 366.9004   | 0.8856      | 0.5920    | 0.2690      |
| 7   | A    | 383.1268   | 0.0959      | 121.6057  | 1.1278      |
| 8   | A    | 451.7799   | 1.4327      | 0.0242    | 3.0720      |
| 9   | A    | 462.2126   | 1.6480      | 0.4103    | 3.9635      |
| 10  | A    | 476.7930   | 0.5739      | 2.3620    | 0.0920      |
| 11  | A    | 519.4872   | 2.0583      | 1.7976    | 9.3136      |
| 12  | A    | 663.9294   | 1.2910      | 3.2812    | 2.2321      |
| 13  | A    | 702.9906   | 3.7392      | 13.7768   | 1.0194      |
| 14  | A    | 703.6135   | 3.2840      | 0.2542    | 0.0193      |
| 15  | A    | 735.7018   | 3.1233      | 11.6271   | 0.8155      |
| 16  | A    | 772.1185   | 3.1532      | 8.6976    | 25.8487     |
| 17  | A    | 901.4319   | 0.6508      | 34.4650   | 0.1765      |
| 18  | A    | 927.5434   | 2.2904      | 157.9533  | 0.1926      |
| 19  | A    | 1171.2844  | 1.9356      | 55.0304   | 2.3628      |
| 20  | A    | 1209.3338  | 2.2486      | 9.1542    | 0.8246      |
| 21  | A    | 1216.9748  | 2.3271      | 7.5193    | 0.7817      |
| 22  | A    | 1286.3078  | 6.7642      | 172.3143  | 0.4206      |
| 23  | A    | 1347.2566  | 2.7312      | 232.6895  | 2.7259      |
| 24  | A    | 1473.0593  | 12.9102     | 1.8665    | 13.2917     |
| 25  | A    | 1520.6334  | 11.3105     | 67.6422   | 0.3006      |
| 26  | A    | 1558.9501  | 11.9660     | 785.9855  | 1.5854      |
| 27  | A    | 1698.0600  | 15.6031     | 31.6683   | 1.9010      |
| 28  | A    | 1719.9738  | 17.2425     | 20.9339   | 13.2196     |
| 29  | A    | 3245.2209  | 6.7932      | 5.9519    | 88.7887     |
| 30  | A    | 3870.2814  | 9.4080      | 143.5165  | 66.6115     |

py-15\_B\_mp2

| NM# | Symm | Wavenumber | Force Const | IR Intens | Raman Activ |
|-----|------|------------|-------------|-----------|-------------|
| 1   | A    | 112.1826   | 0.0983      | 0.3756    | 0.0743      |
| 2   | A    | 199.8906   | 0.3159      | 5.4360    | 0.1175      |
| 3   | A    | 280.3180   | 0.0540      | 103.4170  | 0.8494      |
| 4   | A    | 284.7596   | 0.6225      | 3.9308    | 0.4533      |
| 5   | A    | 289.2234   | 0.3732      | 2.9578    | 1.1389      |
| 6   | A    | 307.4641   | 0.5563      | 4.5168    | 0.0379      |

|    |   |           |         |          |         |
|----|---|-----------|---------|----------|---------|
| 7  | A | 359.9325  | 0.8738  | 0.5469   | 0.2409  |
| 8  | A | 424.4590  | 0.6369  | 6.8556   | 1.2761  |
| 9  | A | 446.8968  | 0.8982  | 3.4111   | 2.2073  |
| 10 | A | 454.6554  | 1.5929  | 0.4692   | 4.1239  |
| 11 | A | 511.4561  | 2.0239  | 1.6384   | 10.2011 |
| 12 | A | 536.7620  | 1.5053  | 0.3640   | 0.8829  |
| 13 | A | 625.8202  | 2.3997  | 2.4126   | 0.0951  |
| 14 | A | 655.6064  | 1.3144  | 3.2295   | 2.3535  |
| 15 | A | 700.3911  | 3.8535  | 11.7705  | 3.2339  |
| 16 | A | 751.6377  | 2.9189  | 11.5737  | 25.0429 |
| 17 | A | 846.2015  | 0.5301  | 41.7977  | 0.0287  |
| 18 | A | 905.9152  | 2.4443  | 149.6550 | 0.2502  |
| 19 | A | 1151.0530 | 3.0936  | 29.1736  | 2.6433  |
| 20 | A | 1195.8419 | 2.7530  | 46.2038  | 0.3053  |
| 21 | A | 1212.0364 | 1.6761  | 57.2121  | 0.2533  |
| 22 | A | 1300.5432 | 2.0377  | 191.5865 | 2.1655  |
| 23 | A | 1430.1943 | 13.2391 | 61.6309  | 9.4377  |
| 24 | A | 1449.3227 | 8.2068  | 149.3548 | 6.6958  |
| 25 | A | 1483.0348 | 9.0452  | 67.9506  | 0.4948  |
| 26 | A | 1531.5488 | 10.5329 | 644.9267 | 1.6423  |
| 27 | A | 1661.2472 | 14.1747 | 10.6062  | 3.2363  |
| 28 | A | 1681.3009 | 16.8018 | 16.1470  | 11.1550 |
| 29 | A | 3253.5739 | 6.8266  | 4.0199   | 92.2986 |
| 30 | A | 3847.9137 | 9.2977  | 123.9187 | 73.6659 |

py-15\_C\_b31yp

| NM# | Symm | Wavenumber | Force Const | IR Intens | Raman Activ |
|-----|------|------------|-------------|-----------|-------------|
| 1   | A    | 115.0346   | 0.1060      | 0.3232    | 0.0685      |
| 2   | A    | 200.1317   | 0.2588      | 0.7117    | 0.3141      |
| 3   | A    | 282.5106   | 0.6525      | 2.0207    | 0.7061      |
| 4   | A    | 297.2886   | 0.4403      | 0.9153    | 1.4708      |
| 5   | A    | 304.7713   | 0.6159      | 1.7325    | 0.1131      |
| 6   | A    | 353.9964   | 0.6898      | 8.0522    | 0.0559      |
| 7   | A    | 426.1031   | 0.2170      | 55.5125   | 1.4536      |
| 8   | A    | 454.9058   | 1.4201      | 1.2821    | 4.3596      |
| 9   | A    | 462.1737   | 0.3802      | 26.4616   | 2.0025      |
| 10  | A    | 495.4901   | 0.3565      | 45.2266   | 0.7712      |
| 11  | A    | 517.4862   | 1.8410      | 6.1749    | 12.0407     |
| 12  | A    | 650.7409   | 1.3234      | 18.9484   | 1.4290      |
| 13  | A    | 695.1741   | 4.2332      | 18.2297   | 1.2479      |
| 14  | A    | 697.0691   | 3.3215      | 0.9715    | 0.2275      |
| 15  | A    | 731.6276   | 2.8171      | 12.4584   | 0.8353      |
| 16  | A    | 759.3584   | 3.0354      | 12.1156   | 25.2609     |
| 17  | A    | 894.8673   | 0.6548      | 27.4323   | 0.1785      |
| 18  | A    | 900.9697   | 1.9729      | 75.6405   | 0.3149      |
| 19  | A    | 1150.0795  | 3.6805      | 26.0524   | 3.9674      |
| 20  | A    | 1175.7938  | 1.9189      | 344.4833  | 1.4269      |

|    |   |           |         |          |         |
|----|---|-----------|---------|----------|---------|
| 21 | A | 1205.3350 | 1.7774  | 65.3334  | 0.2825  |
| 22 | A | 1274.1336 | 4.0337  | 170.1275 | 1.6509  |
| 23 | A | 1357.1574 | 3.7706  | 3.5087   | 0.9119  |
| 24 | A | 1417.4202 | 13.1283 | 9.2134   | 13.4129 |
| 25 | A | 1467.5324 | 10.0512 | 87.4464  | 0.2159  |
| 26 | A | 1525.2173 | 9.8662  | 688.0520 | 2.1159  |
| 27 | A | 1652.4223 | 11.9780 | 0.4086   | 8.9323  |
| 28 | A | 1677.4456 | 15.4750 | 32.4214  | 6.1339  |
| 29 | A | 3216.9221 | 6.6674  | 2.5548   | 97.0313 |
| 30 | A | 3788.9343 | 9.0082  | 121.4254 | 99.5879 |

py-15\_C\_m062x

| NM# | Symm | Wavenumber | Force Const | IR Intens | Raman Activ |
|-----|------|------------|-------------|-----------|-------------|
| 1   | A    | 119.2850   | 0.1139      | 0.3064    | 0.0586      |
| 2   | A    | 204.5543   | 0.2657      | 0.6181    | 0.3083      |
| 3   | A    | 283.1899   | 0.6575      | 2.0823    | 0.5248      |
| 4   | A    | 304.2851   | 0.4595      | 0.8234    | 1.4194      |
| 5   | A    | 306.2580   | 0.6208      | 1.5497    | 0.0936      |
| 6   | A    | 361.0722   | 0.7214      | 8.5980    | 0.0546      |
| 7   | A    | 420.1358   | 0.1463      | 91.1479   | 1.0834      |
| 8   | A    | 458.8011   | 1.4188      | 1.4114    | 4.2822      |
| 9   | A    | 465.9712   | 0.6420      | 13.3066   | 2.7186      |
| 10  | A    | 493.5897   | 0.4521      | 29.2534   | 0.5364      |
| 11  | A    | 521.2925   | 1.8440      | 5.6293    | 9.8076      |
| 12  | A    | 657.3409   | 1.3239      | 20.2387   | 1.2877      |
| 13  | A    | 707.1050   | 4.2806      | 16.7682   | 1.0107      |
| 14  | A    | 708.4482   | 3.5091      | 0.5907    | 0.1612      |
| 15  | A    | 745.0149   | 3.0998      | 12.7877   | 0.8095      |
| 16  | A    | 771.9523   | 3.1318      | 9.3142    | 25.3853     |
| 17  | A    | 907.8962   | 0.6669      | 30.8239   | 0.1977      |
| 18  | A    | 925.4007   | 1.8126      | 58.3044   | 0.3761      |
| 19  | A    | 1186.6215  | 1.6846      | 68.2081   | 2.2509      |
| 20  | A    | 1197.2090  | 1.9363      | 320.5843  | 1.8472      |
| 21  | A    | 1224.5119  | 3.7594      | 8.5642    | 1.0319      |
| 22  | A    | 1288.0537  | 8.9312      | 183.0106  | 1.3184      |
| 23  | A    | 1353.3522  | 2.8384      | 14.0009   | 0.7776      |
| 24  | A    | 1471.5379  | 14.5017     | 3.3895    | 15.3513     |
| 25  | A    | 1512.6781  | 12.3801     | 92.0440   | 0.2453      |
| 26  | A    | 1574.4217  | 11.9033     | 750.9285  | 2.7169      |
| 27  | A    | 1704.9408  | 14.0076     | 0.4439    | 7.2780      |
| 28  | A    | 1725.1656  | 17.2243     | 34.5329   | 7.9502      |
| 29  | A    | 3243.7236  | 6.7850      | 5.4585    | 90.0469     |
| 30  | A    | 3855.4496  | 9.3299      | 149.3125  | 90.2658     |

py-15\_C\_mp2

| NM# | Symm | Wavenumber | Force Const | IR Intens | Raman Activ |
|-----|------|------------|-------------|-----------|-------------|
| 1   | A    | 110.5284   | 0.1063      | 0.0548    | 0.0455      |
| 2   | A    | 199.9726   | 0.2306      | 0.0867    | 0.3172      |
| 3   | A    | 282.8431   | 0.6338      | 2.0513    | 0.6140      |
| 4   | A    | 288.5158   | 0.4021      | 0.0366    | 1.3296      |
| 5   | A    | 306.0501   | 0.6454      | 1.3654    | 0.0635      |
| 6   | A    | 354.0374   | 0.7002      | 8.1678    | 0.0533      |
| 7   | A    | 365.6876   | 0.0874      | 124.2516  | 0.6334      |
| 8   | A    | 440.9136   | 0.7018      | 3.0566    | 0.3858      |
| 9   | A    | 448.6298   | 1.1224      | 1.6829    | 2.9842      |
| 10  | A    | 451.6935   | 1.3704      | 1.6187    | 4.3684      |
| 11  | A    | 512.9339   | 1.8152      | 5.2929    | 10.7821     |
| 12  | A    | 547.3101   | 1.9228      | 3.5684    | 1.1481      |
| 13  | A    | 629.5832   | 2.8301      | 0.0833    | 0.0084      |
| 14  | A    | 648.2061   | 1.3378      | 18.3511   | 1.5067      |
| 15  | A    | 704.6818   | 4.3459      | 14.3877   | 2.9079      |
| 16  | A    | 751.9600   | 2.9869      | 13.2503   | 24.4326     |
| 17  | A    | 852.3945   | 0.5386      | 36.7973   | 0.0274      |
| 18  | A    | 905.4389   | 1.9578      | 62.3778   | 0.4266      |
| 19  | A    | 1168.2355  | 3.3880      | 7.2968    | 1.9211      |
| 20  | A    | 1183.6190  | 1.9313      | 314.7580  | 1.6765      |
| 21  | A    | 1216.0189  | 2.0151      | 74.1823   | 0.1656      |
| 22  | A    | 1303.1283  | 2.3192      | 145.0445  | 1.3666      |
| 23  | A    | 1430.8510  | 13.2386     | 4.5873    | 10.8637     |
| 24  | A    | 1452.2017  | 9.9258      | 18.7397   | 7.8178      |
| 25  | A    | 1478.2235  | 9.5761      | 85.6504   | 0.2773      |
| 26  | A    | 1543.2414  | 10.7334     | 694.5264  | 3.2375      |
| 27  | A    | 1664.9792  | 13.0780     | 4.4449    | 8.6645      |
| 28  | A    | 1691.3716  | 15.9206     | 15.9660   | 5.3906      |
| 29  | A    | 3251.9923  | 6.8180      | 3.6225    | 93.0678     |
| 30  | A    | 3827.0354  | 9.1906      | 128.9763  | 93.2724     |

py-15\_D\_b31yp

| NM# | Symm | Wavenumber | Force Const | IR Intens | Raman Activ |
|-----|------|------------|-------------|-----------|-------------|
| 1   | A    | 109.8245   | 0.1186      | 2.0531    | 0.2486      |
| 2   | A    | 166.8035   | 0.2096      | 4.5357    | 0.9353      |
| 3   | A    | 269.1859   | 0.3510      | 0.8477    | 1.2401      |
| 4   | A    | 278.7797   | 0.8106      | 0.6191    | 0.7559      |
| 5   | A    | 314.0197   | 0.9598      | 0.4216    | 0.3042      |
| 6   | A    | 350.6515   | 1.0223      | 8.3570    | 0.9048      |
| 7   | A    | 382.0755   | 0.5586      | 3.3061    | 2.3954      |
| 8   | A    | 434.4338   | 1.4369      | 1.8543    | 3.5088      |
| 9   | A    | 437.9640   | 0.4062      | 2.8476    | 0.0290      |
| 10  | A    | 497.2071   | 1.9579      | 0.7251    | 11.5526     |
| 11  | A    | 597.6177   | 0.2525      | 69.4050   | 0.3302      |
| 12  | A    | 647.5156   | 2.5665      | 8.9478    | 2.3326      |

|    |   |           |         |          |          |
|----|---|-----------|---------|----------|----------|
| 13 | A | 659.6918  | 1.3606  | 2.3093   | 2.2909   |
| 14 | A | 704.4516  | 2.7259  | 26.7674  | 6.1597   |
| 15 | A | 742.5652  | 3.1087  | 36.6859  | 14.4027  |
| 16 | A | 749.5507  | 3.4545  | 17.2944  | 0.6021   |
| 17 | A | 885.9168  | 1.5590  | 71.5300  | 0.3244   |
| 18 | A | 892.6502  | 0.6482  | 36.3415  | 0.8112   |
| 19 | A | 1143.9384 | 6.3349  | 108.8856 | 9.4130   |
| 20 | A | 1173.4876 | 1.7684  | 29.6793  | 5.2730   |
| 21 | A | 1221.8744 | 3.4888  | 83.1389  | 4.0022   |
| 22 | A | 1285.2628 | 7.6960  | 93.0816  | 18.2732  |
| 23 | A | 1299.8021 | 1.8486  | 100.1308 | 13.3880  |
| 24 | A | 1435.3360 | 7.2999  | 37.3619  | 10.5121  |
| 25 | A | 1492.3224 | 5.6737  | 50.5394  | 30.9566  |
| 26 | A | 1623.2080 | 10.3368 | 37.4208  | 54.4045  |
| 27 | A | 1717.5590 | 13.2433 | 554.2272 | 27.3459  |
| 28 | A | 1776.3681 | 20.1005 | 394.8272 | 33.7661  |
| 29 | A | 3205.7215 | 6.6155  | 2.3685   | 106.4393 |
| 30 | A | 3589.1366 | 8.1797  | 110.6068 | 78.0277  |

py-15\_D\_m062x

| NM# | Symm | Wavenumber | Force Const | IR Intens | Raman Activ |
|-----|------|------------|-------------|-----------|-------------|
| 1   | A    | 111.3125   | 0.1215      | 1.9784    | 0.2598      |
| 2   | A    | 169.1135   | 0.2145      | 4.2826    | 0.9925      |
| 3   | A    | 275.3379   | 0.3634      | 0.9696    | 1.1559      |
| 4   | A    | 278.3401   | 0.8024      | 0.7483    | 0.6027      |
| 5   | A    | 316.5101   | 0.9710      | 0.4047    | 0.3828      |
| 6   | A    | 356.8831   | 1.0522      | 9.0215    | 0.9408      |
| 7   | A    | 389.3743   | 0.4942      | 4.1954    | 2.1537      |
| 8   | A    | 436.3422   | 1.4329      | 2.2551    | 3.1198      |
| 9   | A    | 441.9539   | 0.4532      | 2.0955    | 0.0458      |
| 10  | A    | 502.5267   | 1.9582      | 0.5067    | 9.8667      |
| 11  | A    | 601.7392   | 0.2572      | 75.4065   | 0.4191      |
| 12  | A    | 656.4894   | 2.7850      | 9.3782    | 2.5122      |
| 13  | A    | 665.8371   | 1.3730      | 3.2151    | 2.2724      |
| 14  | A    | 713.8199   | 2.7608      | 25.2603   | 5.5119      |
| 15  | A    | 749.9932   | 3.1722      | 34.5322   | 11.6953     |
| 16  | A    | 757.1951   | 3.6676      | 16.0003   | 0.7496      |
| 17  | A    | 902.8703   | 0.6560      | 41.3509   | 0.9731      |
| 18  | A    | 905.8418   | 1.4574      | 63.8551   | 0.6140      |
| 19  | A    | 1191.3949  | 1.4882      | 59.9332   | 2.8293      |
| 20  | A    | 1195.4426  | 4.2204      | 76.6677   | 13.0208     |
| 21  | A    | 1251.8330  | 6.5070      | 71.5762   | 7.4443      |
| 22  | A    | 1313.6726  | 2.4938      | 39.2568   | 1.0924      |
| 23  | A    | 1323.7915  | 4.5249      | 146.2960  | 46.1141     |
| 24  | A    | 1470.1260  | 8.0056      | 55.7302   | 7.1836      |
| 25  | A    | 1530.5061  | 7.2862      | 64.0057   | 36.2363     |
| 26  | A    | 1677.2015  | 12.4286     | 54.3424   | 69.2566     |

|    |   |           |         |          |         |
|----|---|-----------|---------|----------|---------|
| 27 | A | 1776.9592 | 15.7662 | 583.3664 | 27.0081 |
| 28 | A | 1836.3361 | 22.3407 | 442.2118 | 34.6092 |
| 29 | A | 3234.0004 | 6.7388  | 5.4644   | 96.4956 |
| 30 | A | 3610.2224 | 8.2782  | 134.8425 | 73.4545 |

py-15\_D\_mp2

| NM# | Symm | Wavenumber | Force Const | IR Intens | Raman Activ |
|-----|------|------------|-------------|-----------|-------------|
| 1   | A    | 24.8229    | 0.0053      | 0.1626    | 0.5989      |
| 2   | A    | 136.4577   | 0.1833      | 0.0943    | 0.1151      |
| 3   | A    | 222.2968   | 0.2261      | 9.1898    | 1.3052      |
| 4   | A    | 277.2651   | 0.7974      | 0.7645    | 0.7148      |
| 5   | A    | 315.8646   | 0.9684      | 0.4260    | 0.7851      |
| 6   | A    | 348.6599   | 1.0097      | 8.3852    | 1.0636      |
| 7   | A    | 358.5352   | 0.3919      | 8.3706    | 2.6525      |
| 8   | A    | 409.6260   | 0.6156      | 0.5320    | 0.3420      |
| 9   | A    | 431.4734   | 1.3782      | 1.8693    | 3.4401      |
| 10  | A    | 453.5146   | 0.9615      | 3.4969    | 1.3903      |
| 11  | A    | 495.2440   | 1.9335      | 0.8329    | 11.9608     |
| 12  | A    | 572.6949   | 0.2326      | 73.5602   | 0.2219      |
| 13  | A    | 648.3728   | 2.4694      | 1.8878    | 0.4412      |
| 14  | A    | 654.2797   | 1.3846      | 2.1062    | 2.6407      |
| 15  | A    | 702.9357   | 2.7192      | 24.8477   | 5.0211      |
| 16  | A    | 739.2169   | 3.0888      | 30.3324   | 12.9107     |
| 17  | A    | 850.5778   | 0.5506      | 47.1222   | 0.2496      |
| 18  | A    | 889.4712   | 1.5482      | 60.3152   | 0.4417      |
| 19  | A    | 1178.2075  | 3.0046      | 123.0514  | 9.0215      |
| 20  | A    | 1194.7925  | 2.2227      | 20.0786   | 13.1482     |
| 21  | A    | 1232.0010  | 3.6549      | 80.5646   | 2.9039      |
| 22  | A    | 1306.0198  | 1.9793      | 52.7174   | 0.5071      |
| 23  | A    | 1334.6369  | 6.8123      | 90.4349   | 66.8559     |
| 24  | A    | 1458.6707  | 8.2644      | 28.5509   | 9.4499      |
| 25  | A    | 1508.1041  | 6.7347      | 57.4169   | 64.7078     |
| 26  | A    | 1634.0666  | 11.5184     | 4.8944    | 38.0370     |
| 27  | A    | 1722.7948  | 13.2279     | 618.0570  | 95.9798     |
| 28  | A    | 1787.2085  | 20.4016     | 284.7243  | 49.8074     |
| 29  | A    | 3243.0781  | 6.7741      | 3.6727    | 101.7090    |
| 30  | A    | 3603.2229  | 8.2449      | 118.5715  | 77.1010     |

# D Composition of the vibrational normal modes as a function of the internal coordinates

Level of theory: DFT B3LYP[GD3BJ] / 6-311++G\*\*

## Molecule 1

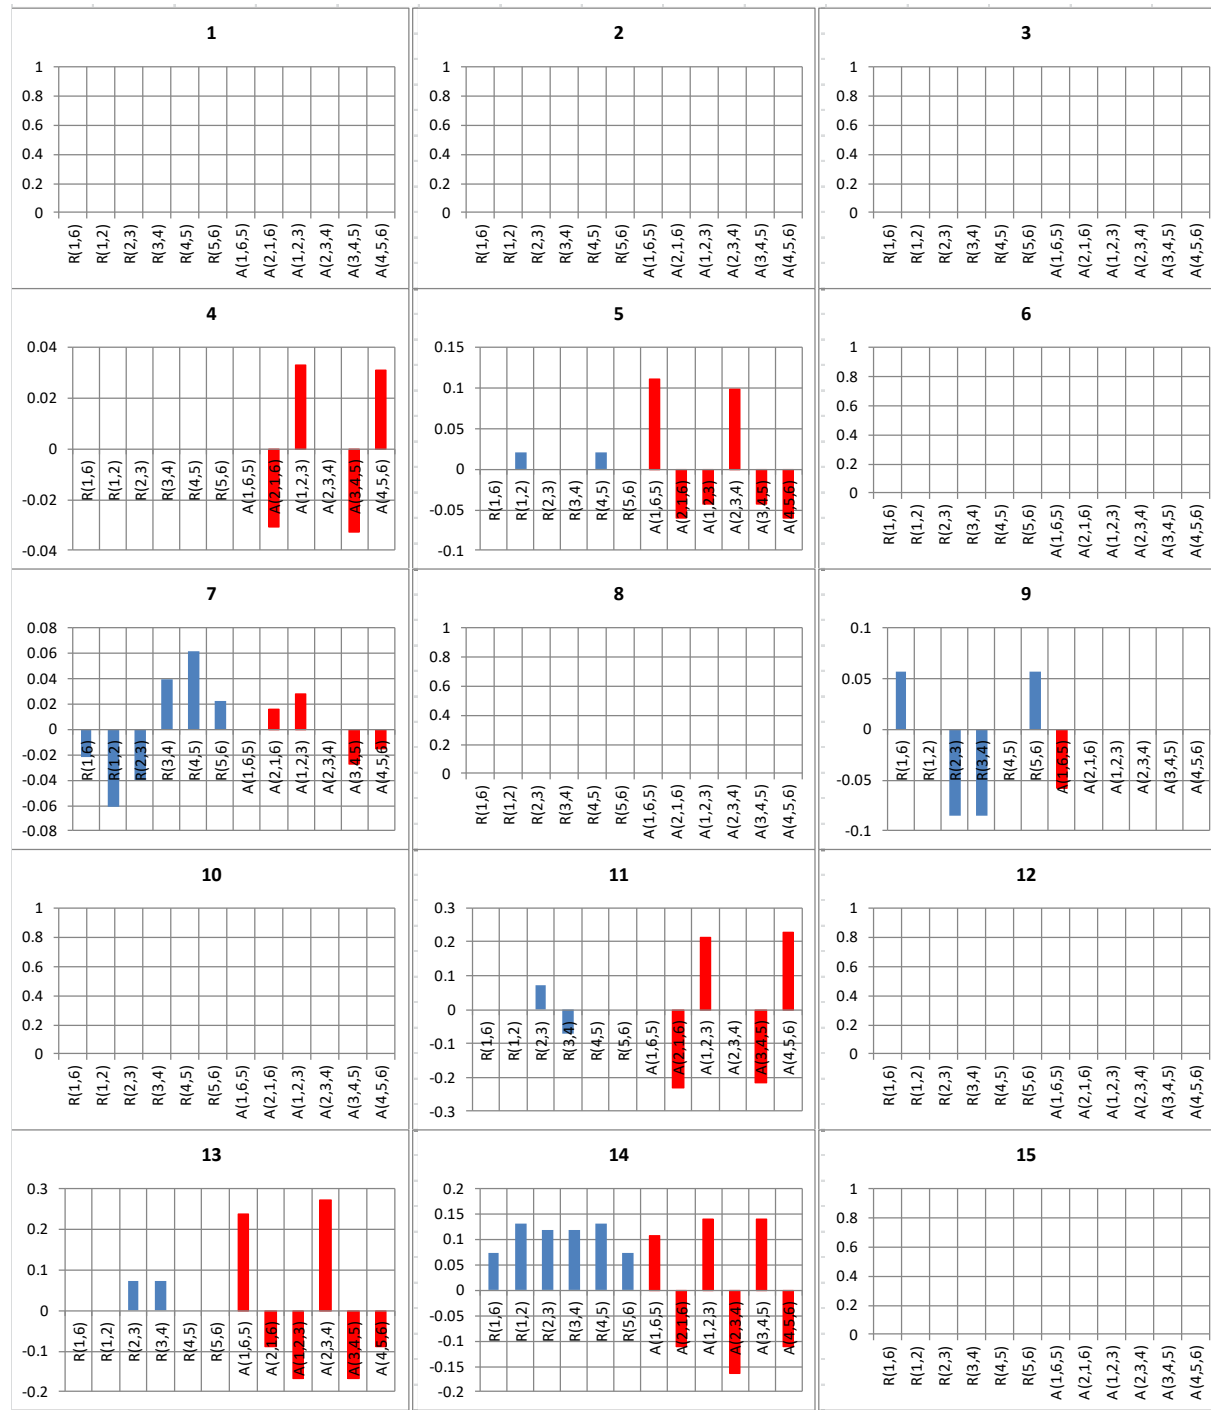

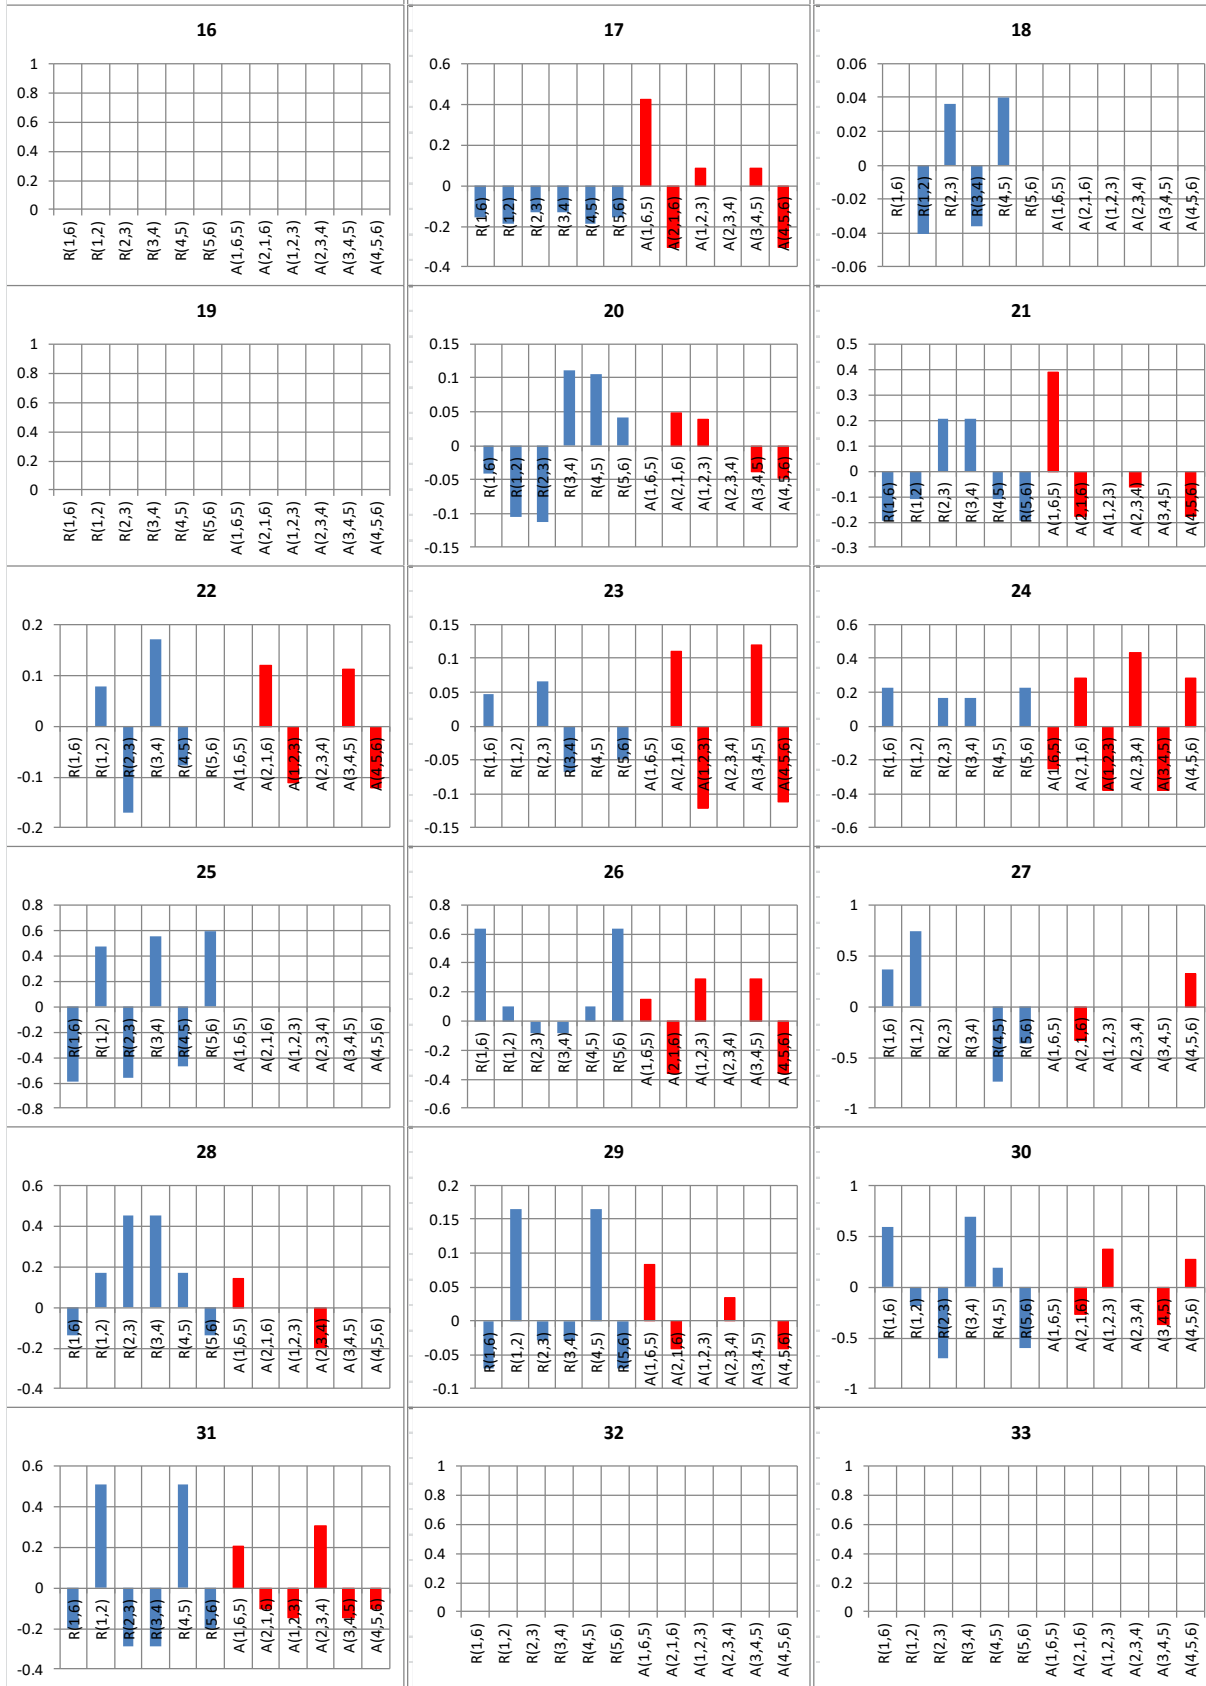



Molecule 2

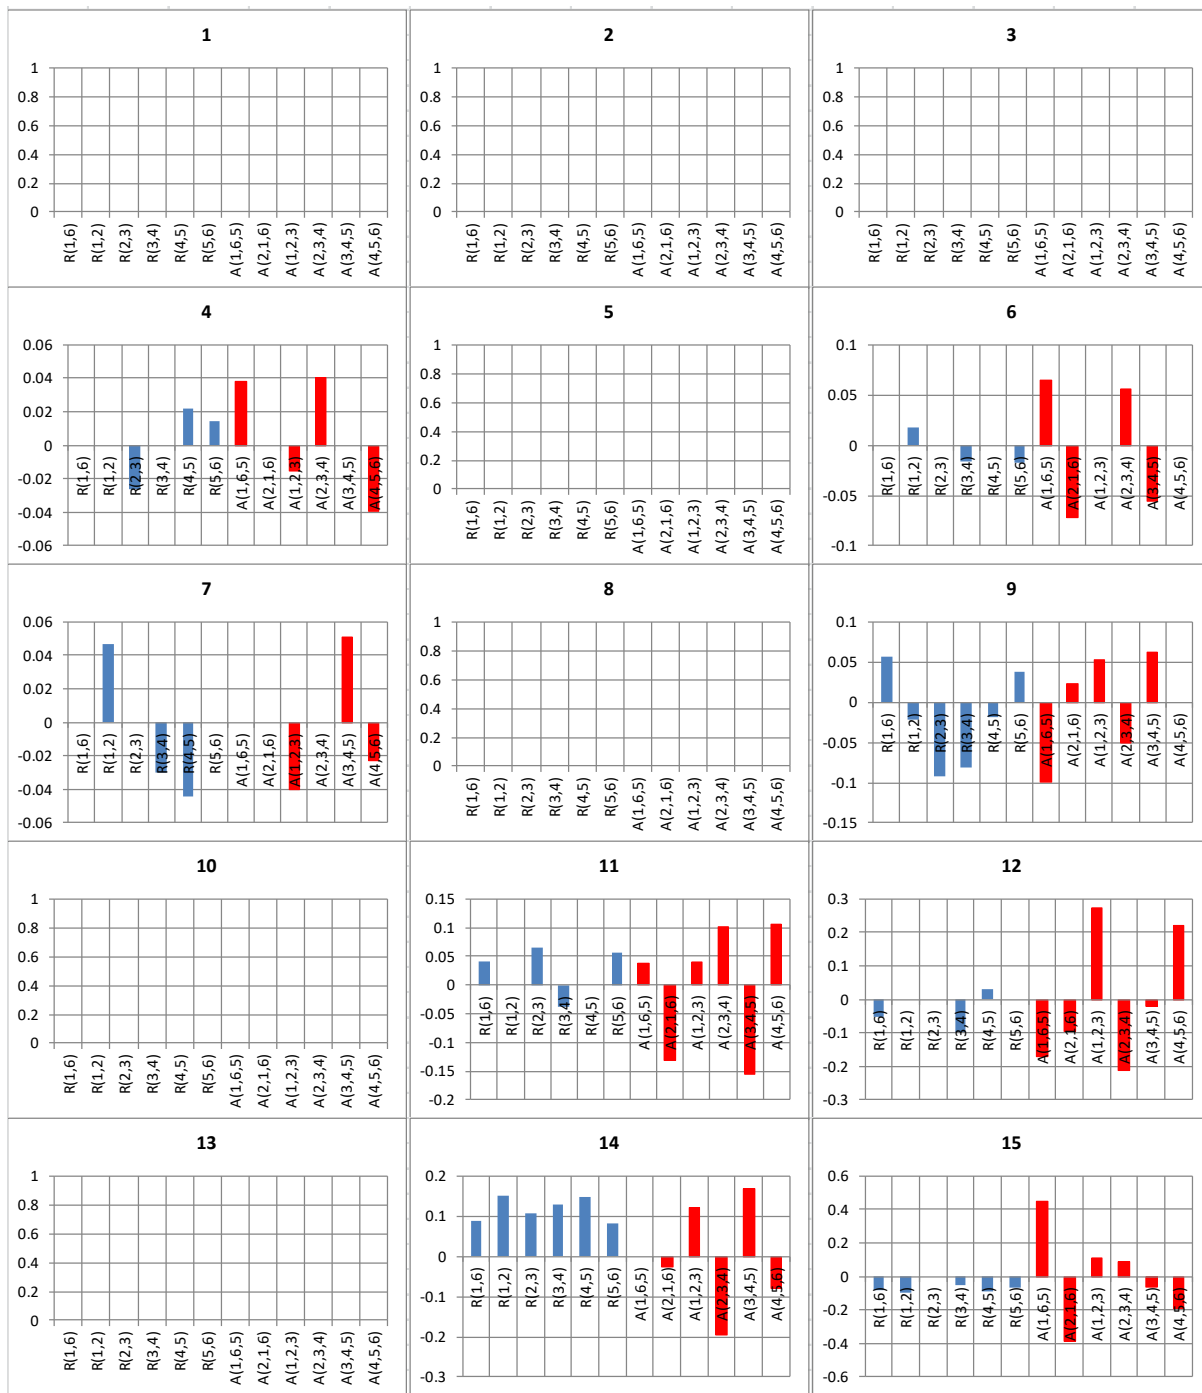

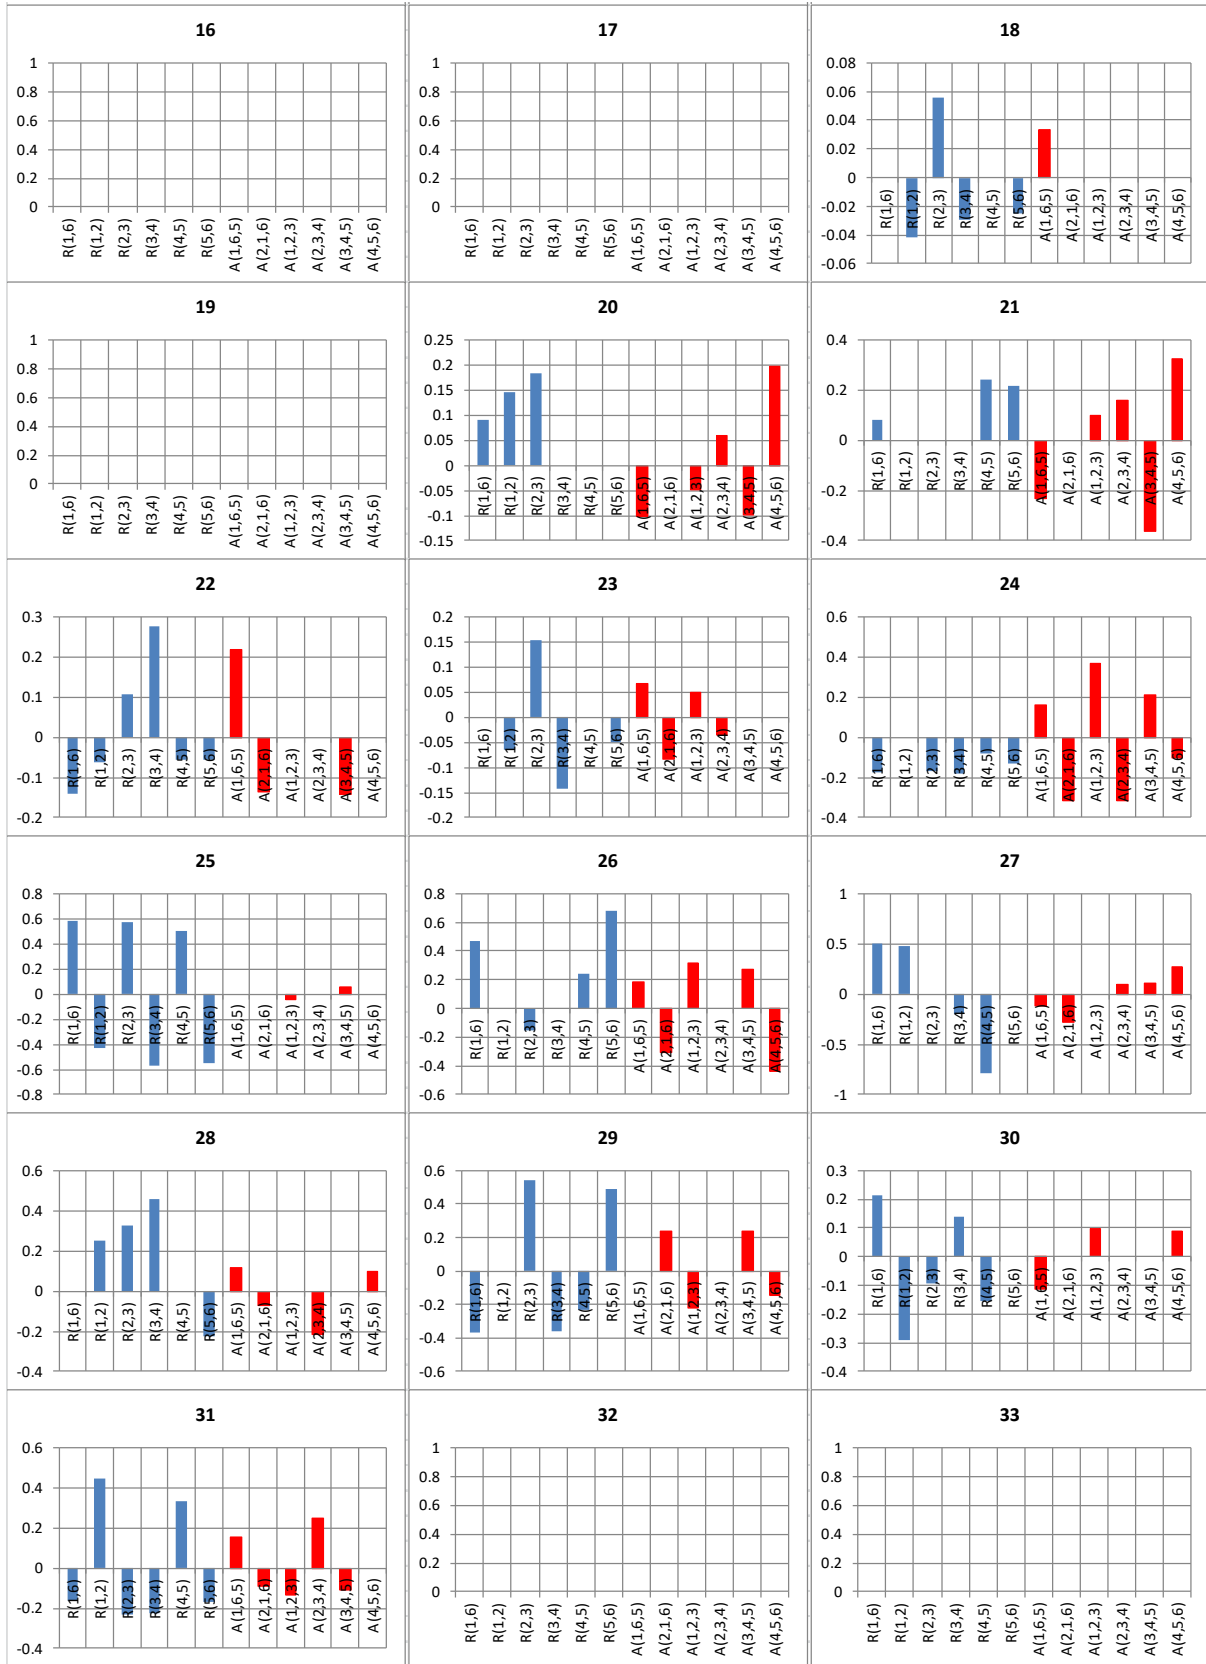

Molecule 3

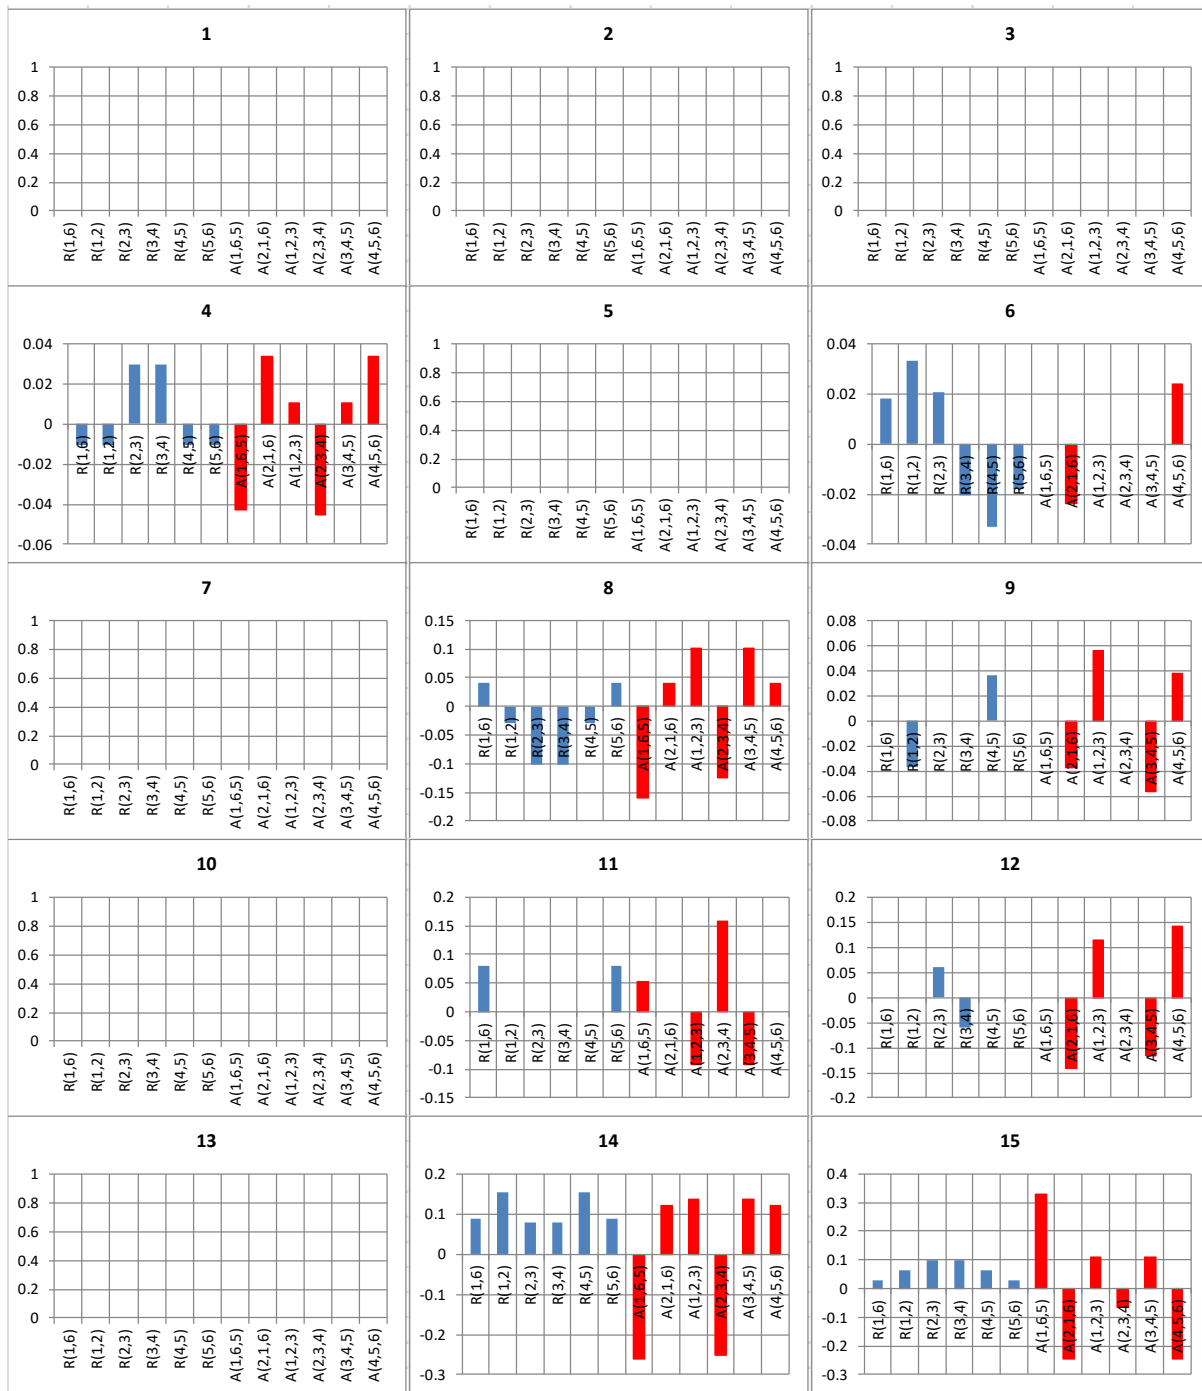

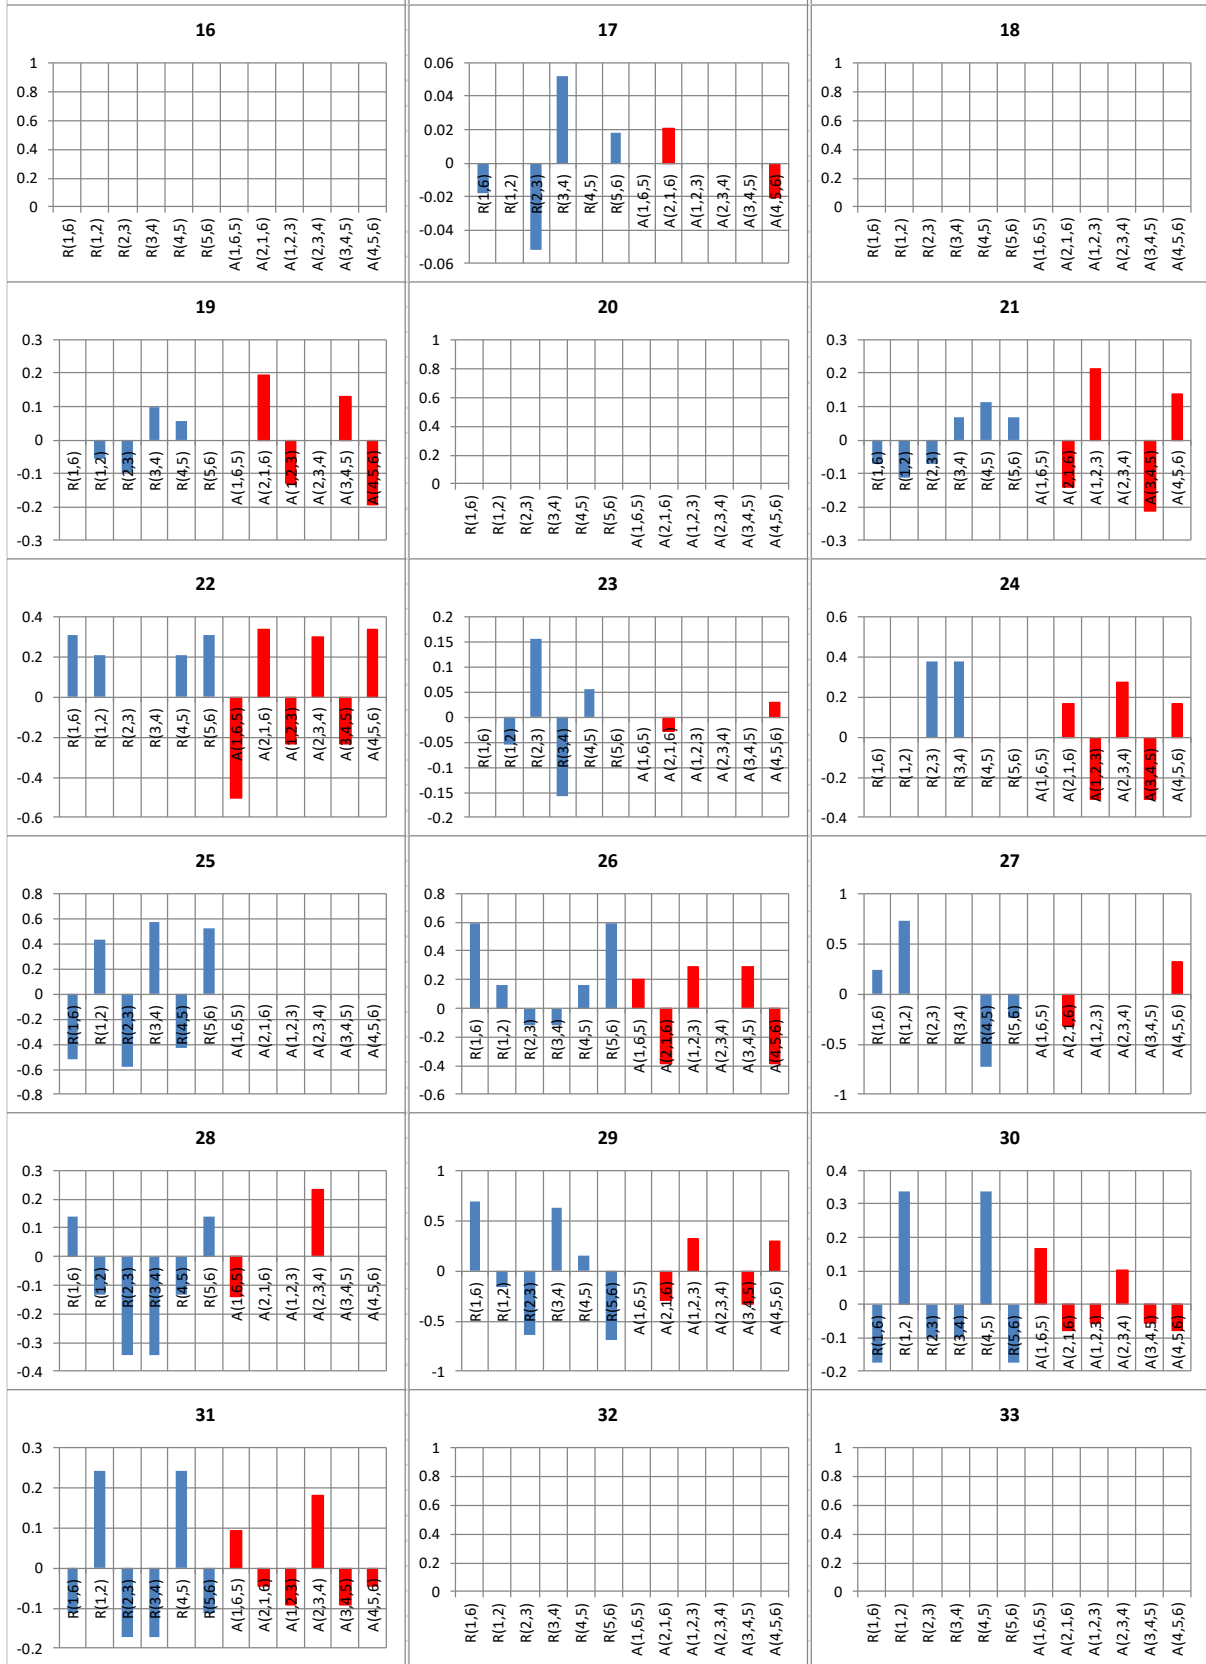

# Molecule 4

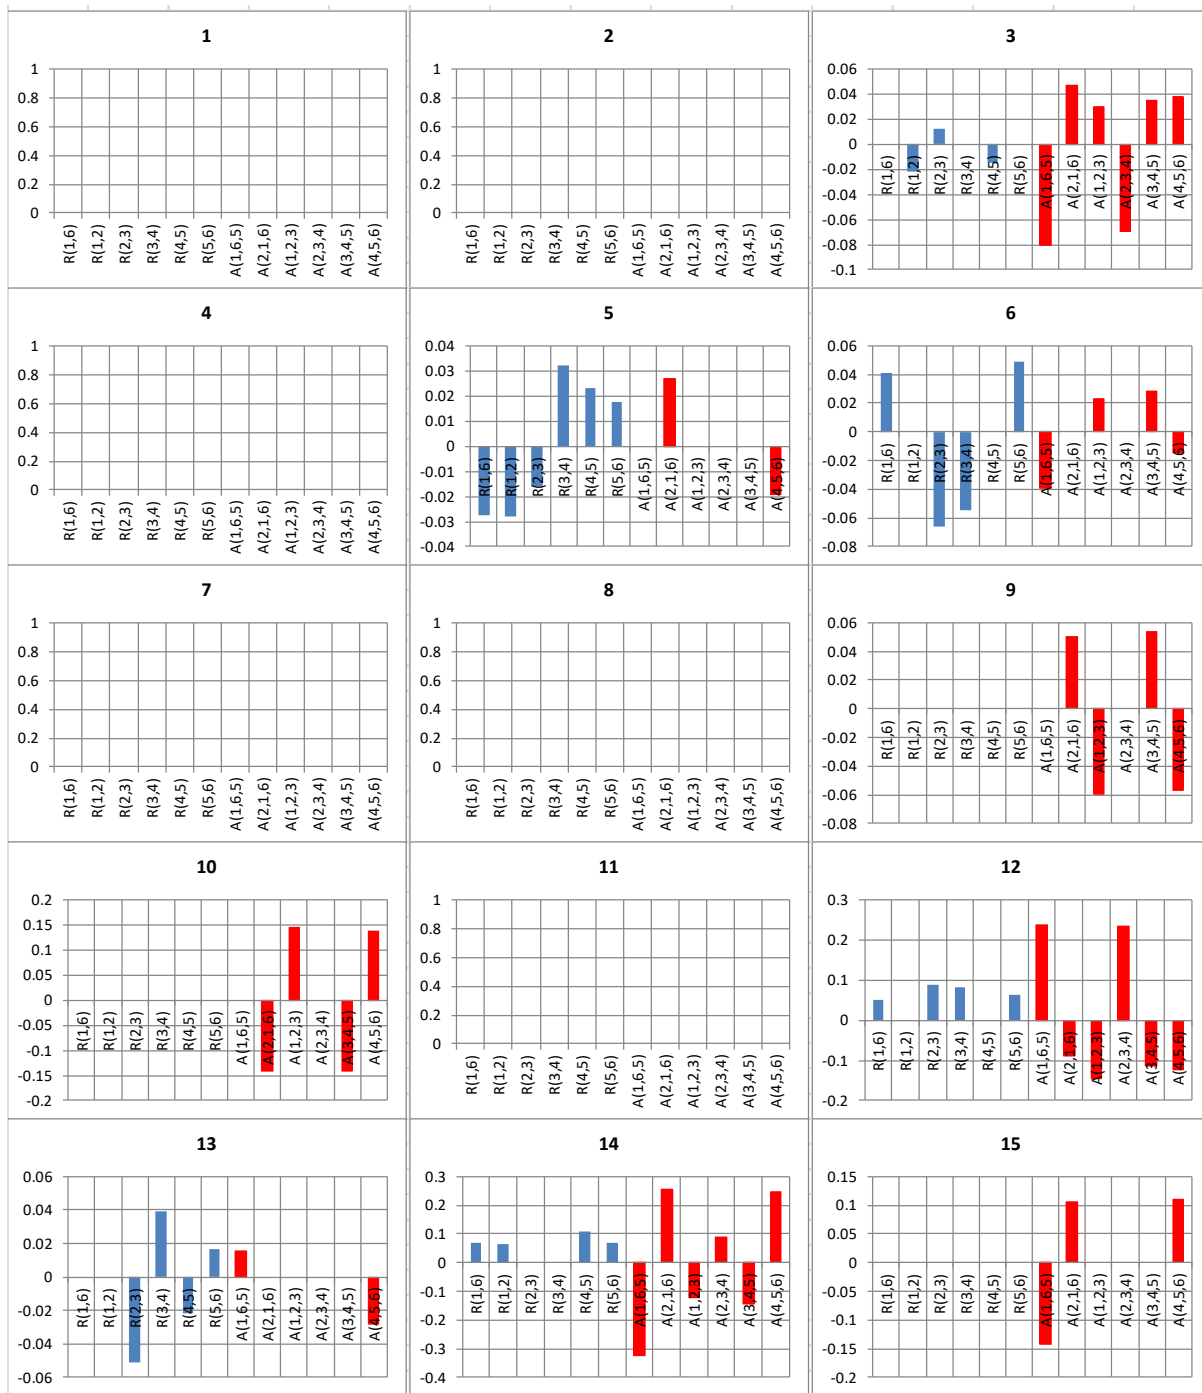

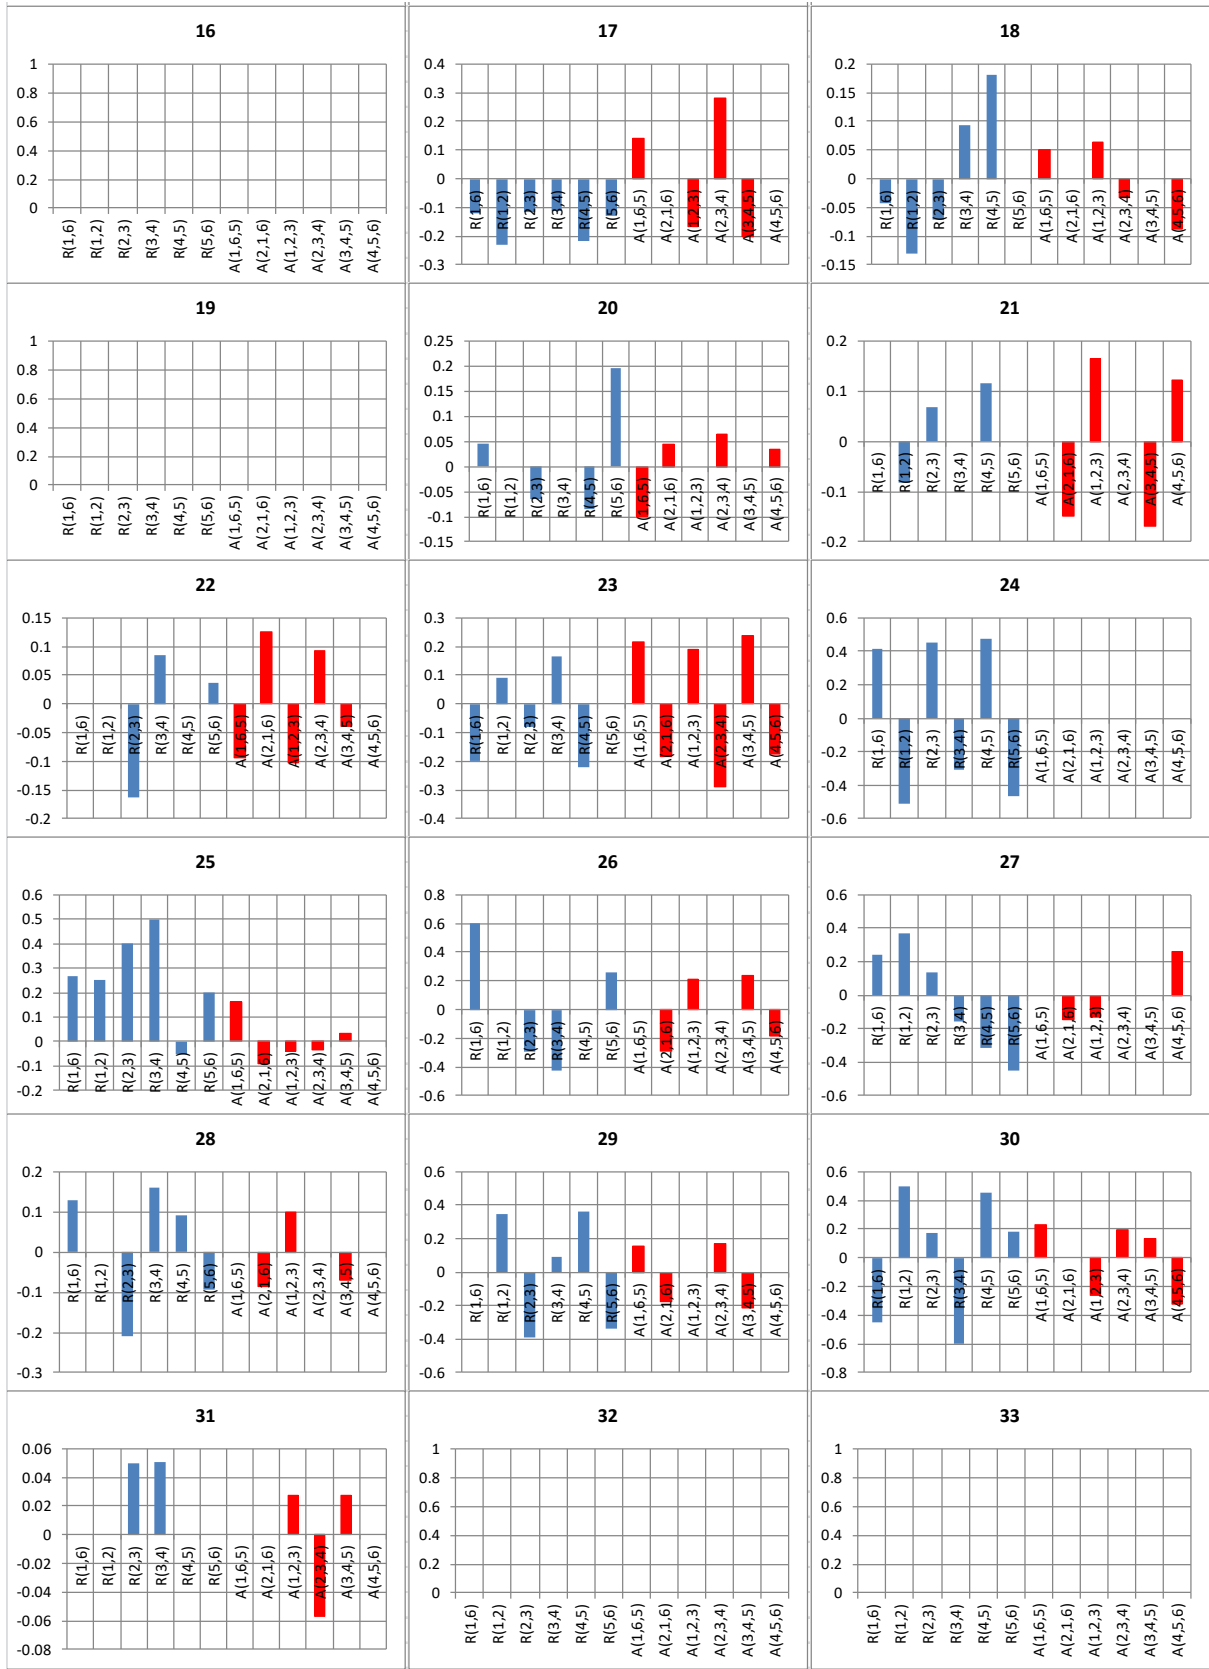

Molecule 5

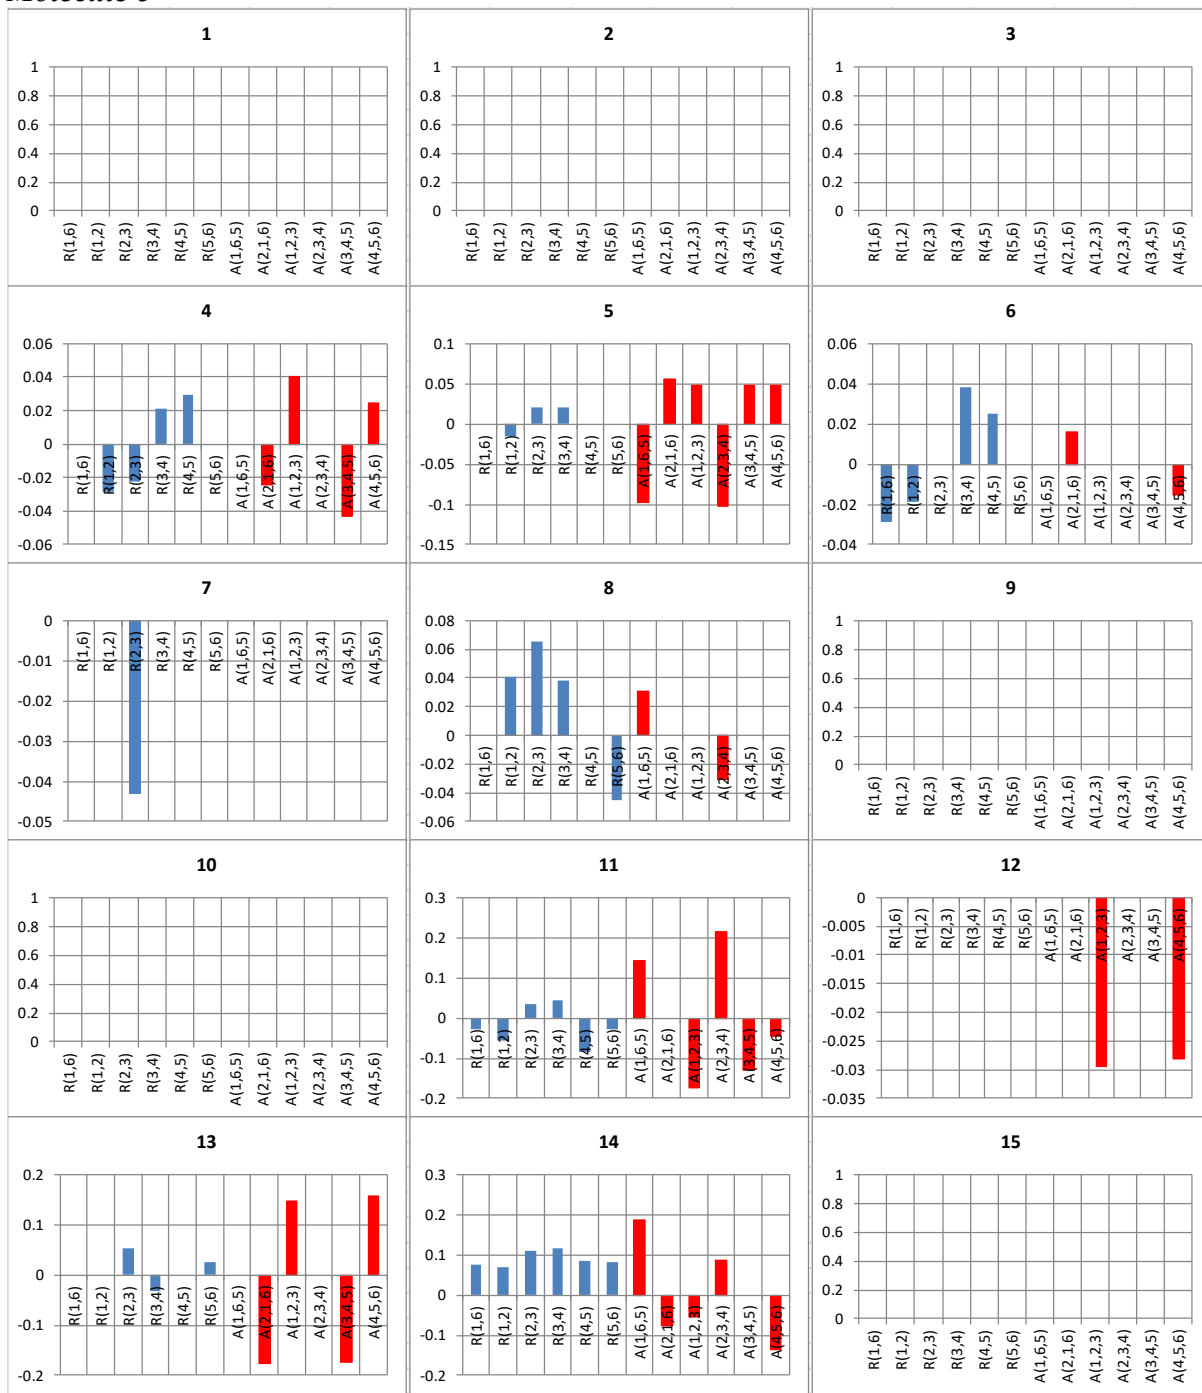

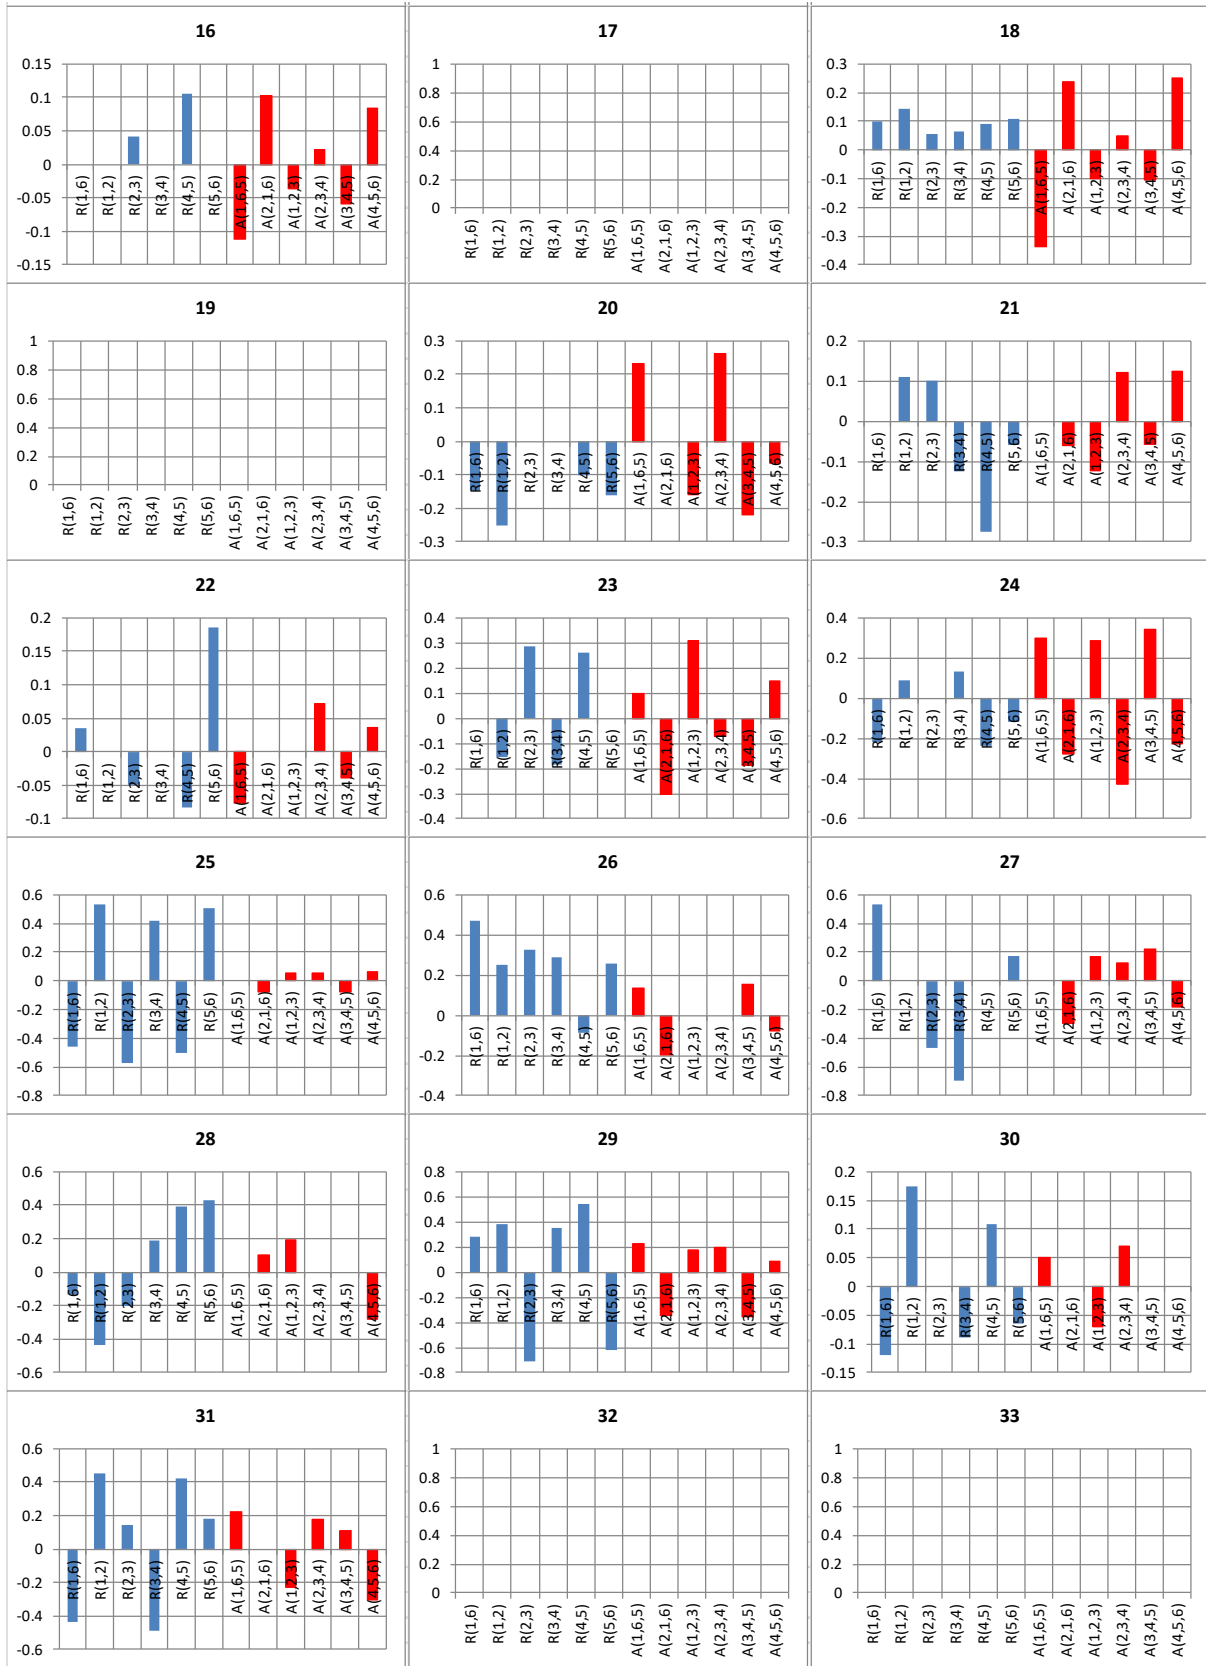



# Molecule 6

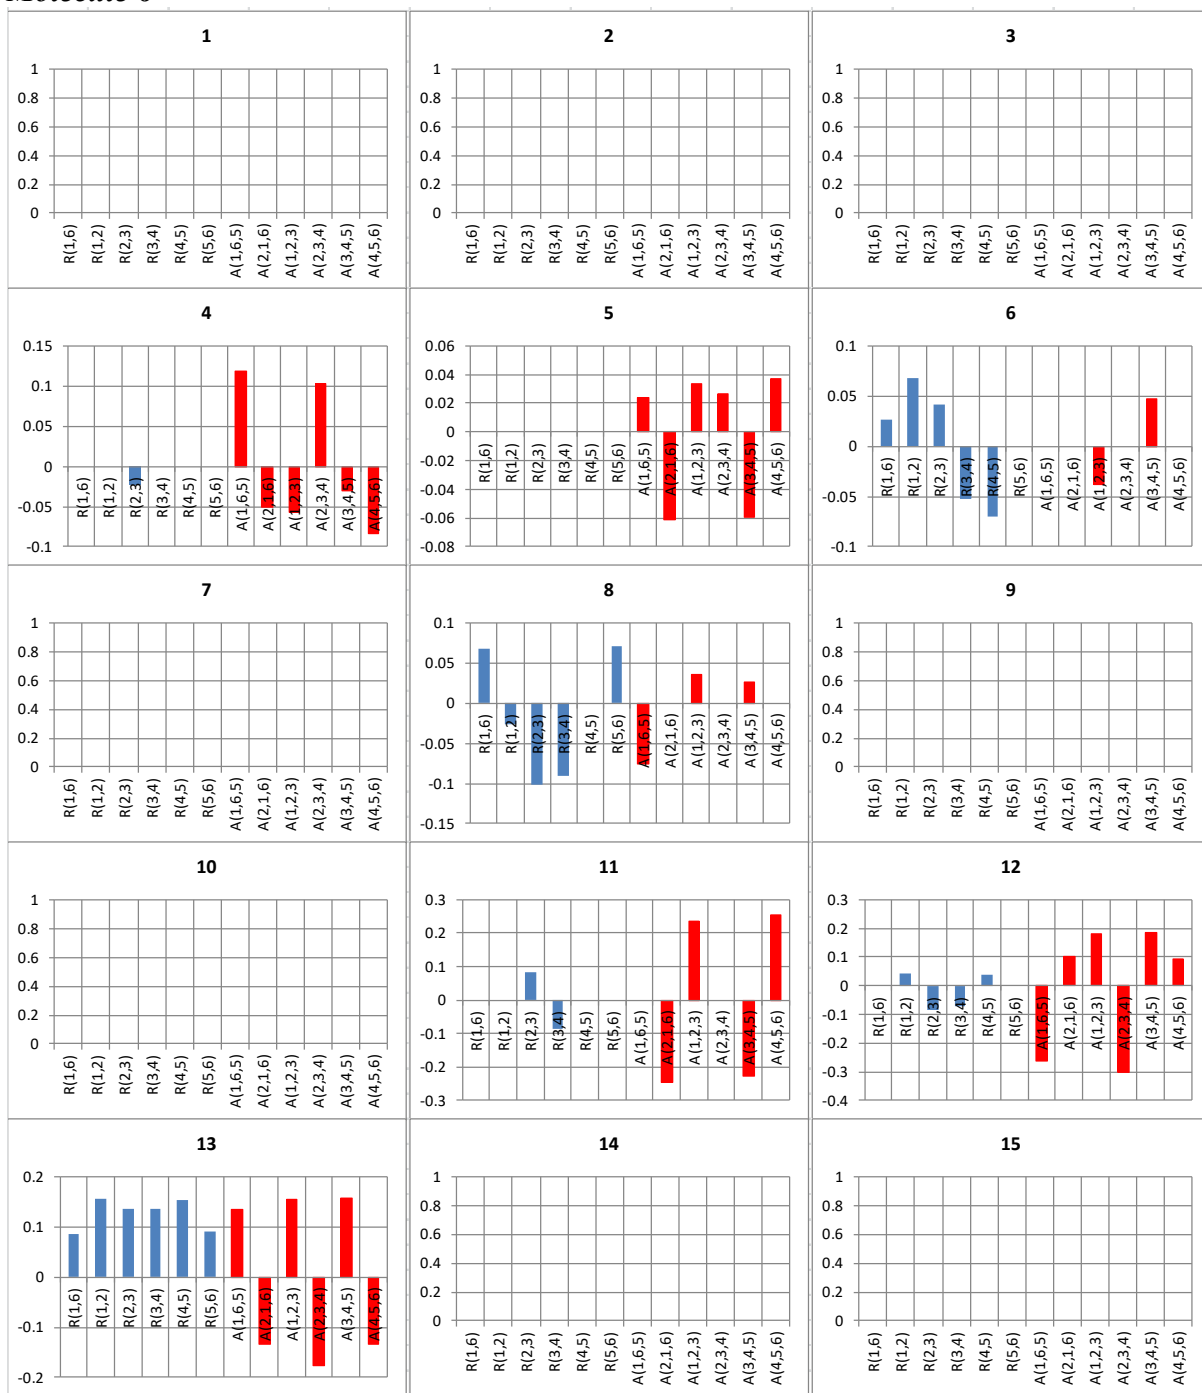

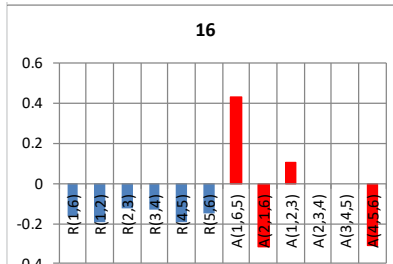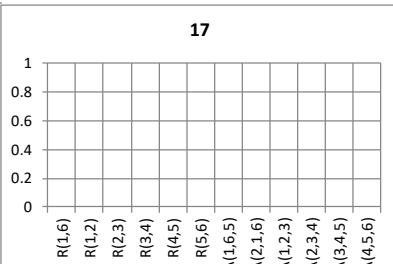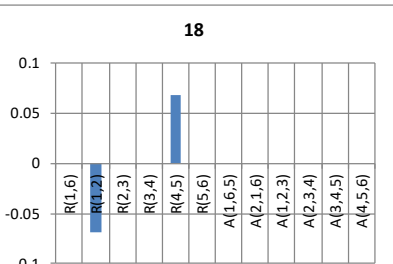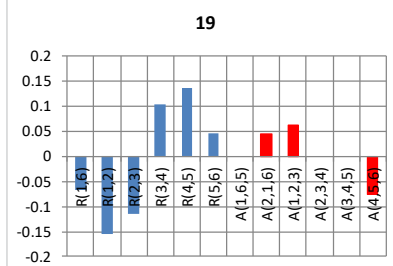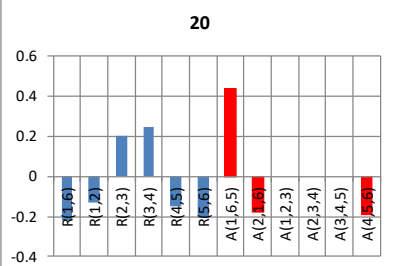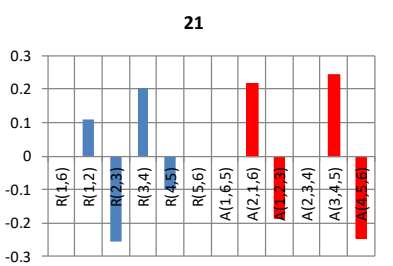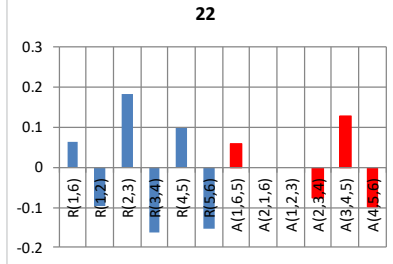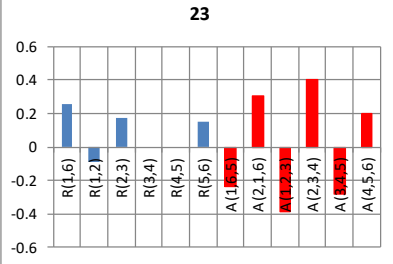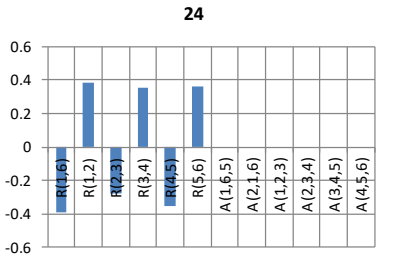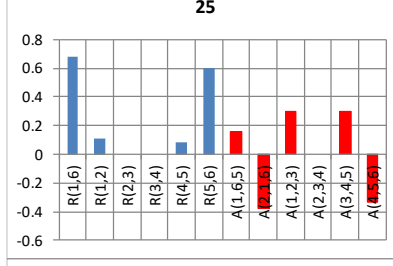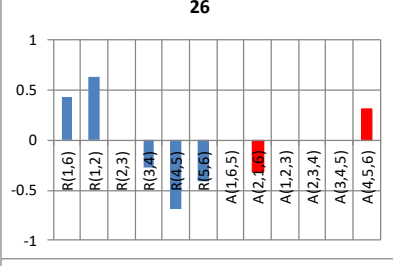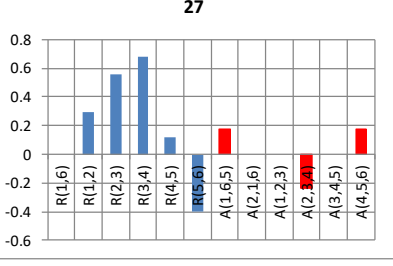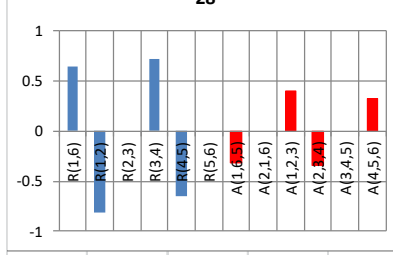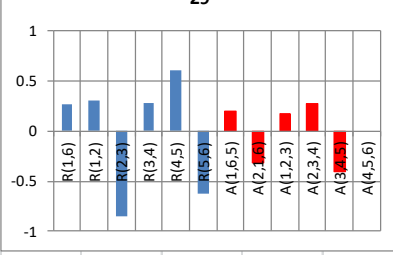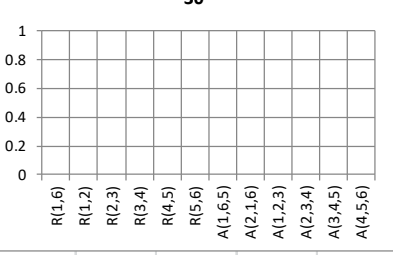

Molecule 7

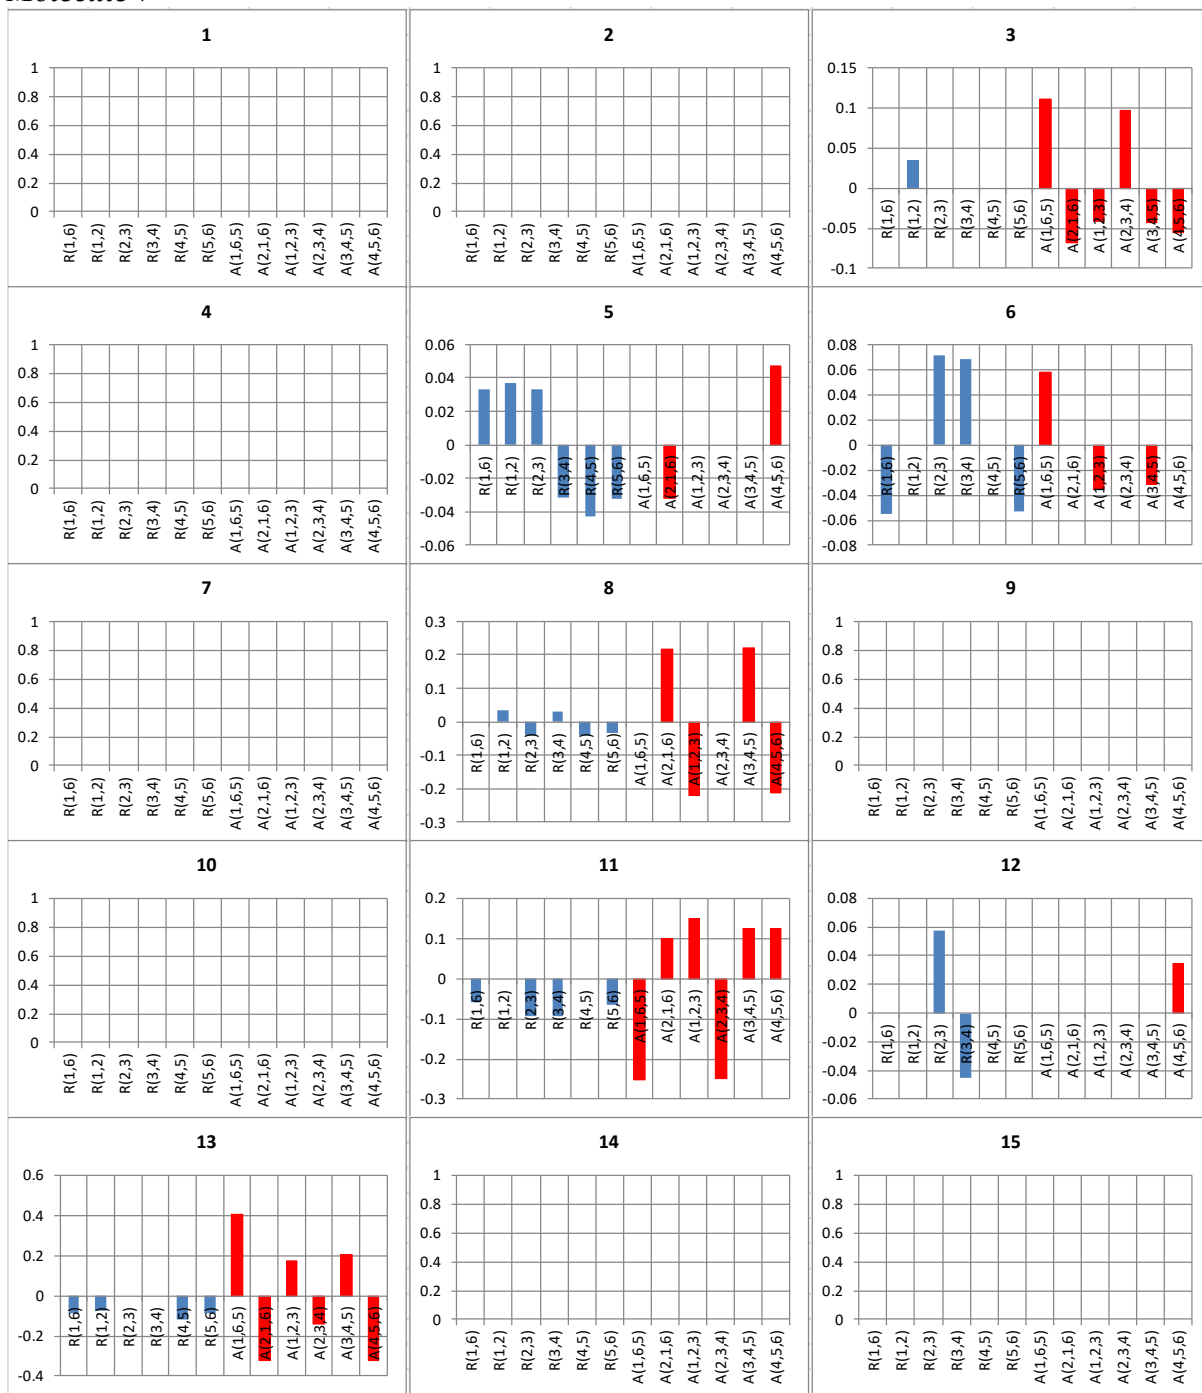

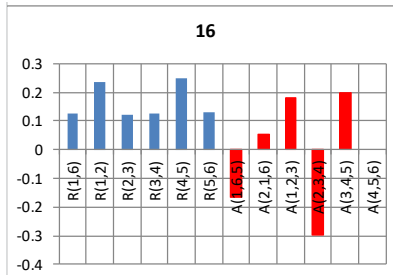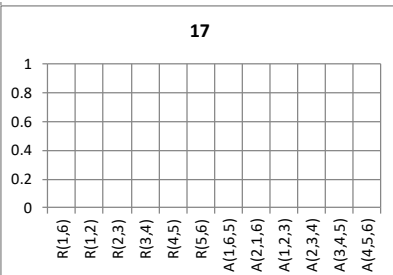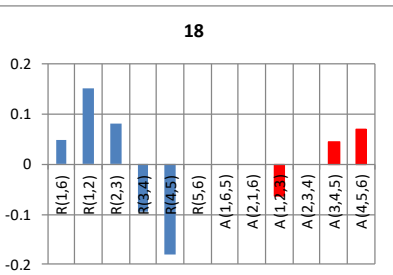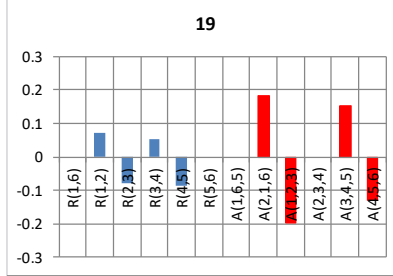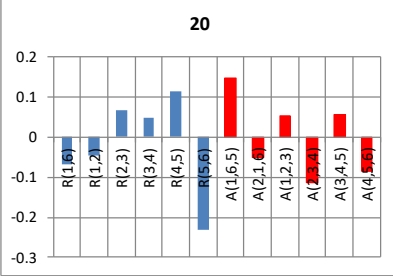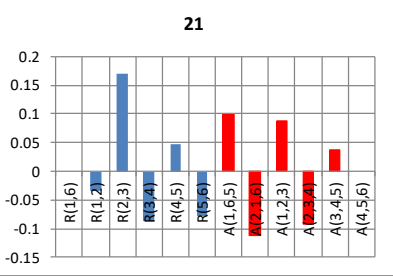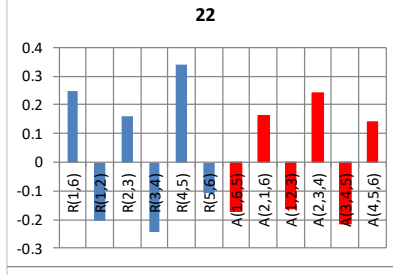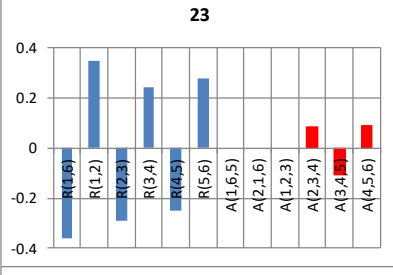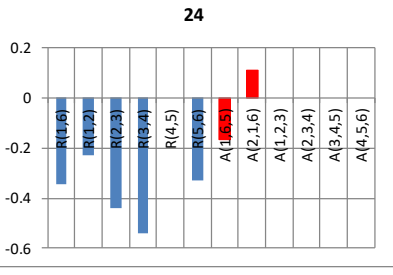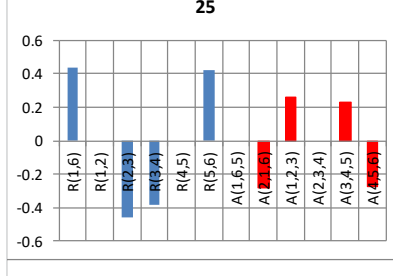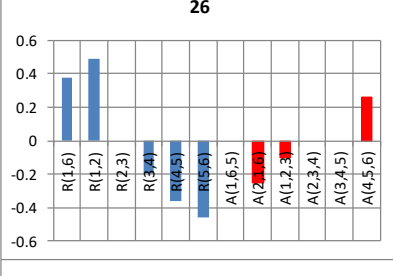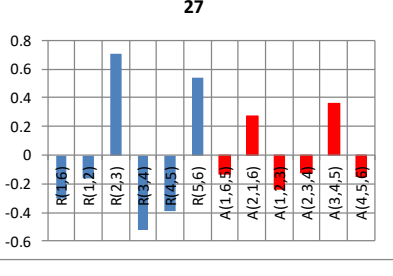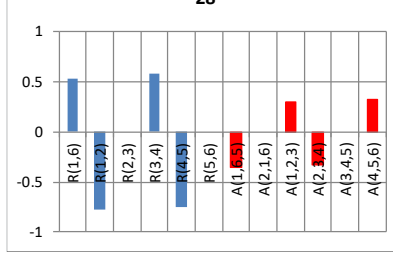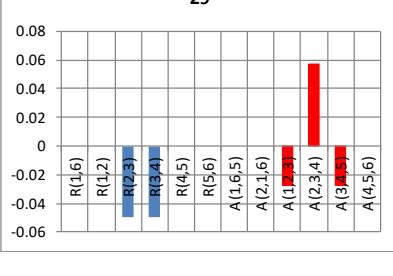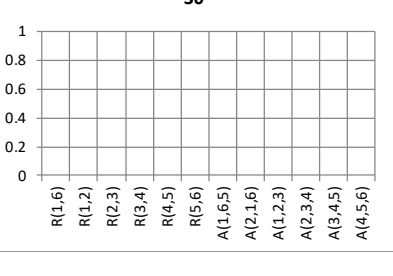

## E Optimised Geometries of aggregates

01\_hb

|   |           |           |          |
|---|-----------|-----------|----------|
| 7 | 2.599090  | 10.164742 | 1.851303 |
| 7 | 1.645887  | 6.122583  | 2.205000 |
| 6 | 1.963192  | 7.432502  | 2.101524 |
| 6 | 1.092771  | 8.450918  | 2.522906 |
| 6 | 1.459368  | 9.772733  | 2.374414 |
| 6 | 3.429499  | 9.227694  | 1.451855 |
| 6 | 3.175898  | 7.874136  | 1.548004 |
| 9 | 4.065869  | 6.953721  | 1.124648 |
| 9 | -0.091258 | 8.097196  | 3.070766 |
| 9 | 0.613521  | 10.725806 | 2.784314 |
| 9 | 4.591497  | 9.627072  | 0.920917 |
| 1 | 2.319799  | 5.396436  | 1.991574 |
| 1 | 0.805460  | 5.856551  | 2.689645 |
| 7 | 3.137472  | 3.468503  | 1.802269 |
| 7 | 4.212972  | -0.547944 | 1.593087 |
| 6 | 3.854694  | 0.757973  | 1.645712 |
| 6 | 4.691008  | 1.781197  | 1.175508 |
| 6 | 4.288826  | 3.097933  | 1.277570 |
| 6 | 2.338041  | 2.521558  | 2.246045 |
| 6 | 2.633609  | 1.175983  | 2.196523 |
| 9 | 1.781062  | 0.241506  | 2.659992 |
| 9 | 5.874329  | 1.442249  | 0.628834 |
| 9 | 5.091018  | 4.057710  | 0.827139 |
| 9 | 1.172068  | 2.914529  | 2.771773 |
| 1 | 3.541514  | -1.259231 | 1.828699 |
| 1 | 5.039650  | -0.817342 | 1.086655 |

01\_pi

|   |          |           |           |
|---|----------|-----------|-----------|
| 7 | 2.422816 | 11.070939 | 2.225164  |
| 7 | 2.156287 | 7.057939  | 1.118371  |
| 6 | 2.243705 | 8.366877  | 1.480760  |
| 6 | 1.189146 | 9.039283  | 2.115331  |
| 6 | 1.333995 | 10.369758 | 2.456350  |
| 6 | 3.426712 | 10.452148 | 1.645706  |
| 6 | 3.403090 | 9.125945  | 1.266102  |
| 9 | 4.452074 | 8.546761  | 0.649911  |
| 9 | 0.044448 | 8.369990  | 2.346191  |
| 9 | 0.314908 | 11.001979 | 3.042106  |
| 9 | 4.523391 | 11.177664 | 1.390012  |
| 1 | 2.807834 | 6.732479  | 0.420051  |
| 1 | 1.230985 | 6.659667  | 1.066196  |
| 7 | 2.123756 | 8.857910  | -1.876240 |
| 7 | 2.390283 | 12.870914 | -0.769458 |
| 6 | 2.302868 | 11.561974 | -1.131843 |
| 6 | 1.143482 | 10.802907 | -0.917185 |
| 6 | 1.119860 | 9.476703  | -1.296782 |

|   |          |           |           |
|---|----------|-----------|-----------|
| 6 | 3.212577 | 9.559089  | -2.107425 |
| 6 | 3.357426 | 10.889567 | -1.766413 |
| 9 | 4.502123 | 11.558859 | -1.997277 |
| 9 | 0.094499 | 11.382092 | -0.300991 |
| 9 | 0.023183 | 8.751186  | -1.041089 |
| 9 | 4.231666 | 8.926867  | -2.693178 |
| 1 | 3.315585 | 13.269185 | -0.717288 |
| 1 | 1.738742 | 13.196370 | -0.071132 |

02\_h1

|    |           |          |           |
|----|-----------|----------|-----------|
| 17 | -0.119911 | 5.377943 | 1.002960  |
| 7  | 2.099378  | 3.140191 | 3.442878  |
| 9  | 1.878307  | 5.365436 | 3.193924  |
| 6  | 1.523001  | 4.134722 | 2.807982  |
| 7  | -0.668633 | 2.443363 | 0.410032  |
| 1  | -1.134128 | 3.181437 | -0.102691 |
| 1  | -0.890153 | 1.492231 | 0.169783  |
| 9  | 0.538045  | 0.374267 | 1.739128  |
| 6  | 0.593087  | 3.998284 | 1.788792  |
| 9  | 2.346044  | 0.907138 | 3.719912  |
| 6  | 0.224157  | 2.695821 | 1.388132  |
| 6  | 0.852292  | 1.644948 | 2.079935  |
| 6  | 1.761302  | 1.923204 | 3.075786  |
| 17 | -4.698218 | 1.474357 | -4.003517 |
| 7  | -2.524440 | 3.820699 | -1.628755 |
| 9  | -2.700019 | 1.586904 | -1.814327 |
| 6  | -3.083034 | 2.798067 | -2.237832 |
| 7  | -5.301089 | 4.384212 | -4.676220 |
| 1  | -5.738188 | 3.606580 | -5.141040 |
| 1  | -5.551454 | 5.321283 | -4.941909 |
| 9  | -4.136995 | 6.506982 | -3.403280 |
| 6  | -4.014027 | 2.888923 | -3.258358 |
| 9  | -2.319586 | 6.063673 | -1.410465 |
| 6  | -4.403268 | 4.175070 | -3.689034 |
| 6  | -3.798019 | 5.257176 | -3.028637 |
| 6  | -2.883170 | 5.026589 | -2.025325 |

02\_h2

|    |           |           |          |
|----|-----------|-----------|----------|
| 9  | 8.991910  | 13.568271 | 2.692715 |
| 6  | 8.845659  | 12.460748 | 3.455650 |
| 6  | 9.981296  | 11.920253 | 4.081553 |
| 6  | 9.757673  | 10.767565 | 4.864732 |
| 17 | 11.089432 | 10.010925 | 5.694443 |
| 7  | 11.201102 | 12.476527 | 3.915576 |
| 1  | 11.987883 | 12.131457 | 4.439239 |
| 1  | 11.304250 | 13.351453 | 3.428931 |
| 17 | 11.246270 | 15.750388 | 2.196306 |
| 7  | 15.102215 | 15.917554 | 3.182103 |

|   |           |           |          |
|---|-----------|-----------|----------|
| 7 | 12.411056 | 18.372717 | 1.162907 |
| 1 | 11.434623 | 18.139238 | 1.098126 |
| 1 | 12.714616 | 19.285097 | 0.867886 |
| 9 | 13.501450 | 14.369071 | 3.523477 |
| 9 | 15.017412 | 19.120375 | 1.535497 |
| 9 | 16.732691 | 17.451846 | 2.860547 |
| 6 | 14.605572 | 17.931164 | 2.021273 |
| 6 | 13.263698 | 17.562848 | 1.831757 |
| 6 | 13.853396 | 15.562634 | 3.014612 |
| 6 | 15.462858 | 17.084236 | 2.690853 |
| 6 | 12.887273 | 16.313044 | 2.364310 |
| 7 | 7.417931  | 10.787154 | 4.355604 |
| 9 | 8.247366  | 9.177070  | 5.690153 |
| 9 | 6.551028  | 12.395226 | 3.019814 |
| 6 | 8.466944  | 10.268103 | 4.950600 |
| 6 | 7.616645  | 11.862301 | 3.625762 |

02\_p1

|    |           |           |          |
|----|-----------|-----------|----------|
| 17 | -0.125092 | 2.789400  | 5.114680 |
| 7  | 2.416788  | 0.625819  | 2.946052 |
| 9  | 2.515313  | 1.451163  | 5.035732 |
| 6  | 1.836286  | 1.325848  | 3.894296 |
| 7  | -1.339896 | 2.332806  | 2.359083 |
| 1  | -1.878702 | 2.619194  | 3.162140 |
| 1  | -1.861987 | 2.020447  | 1.555332 |
| 9  | -0.104715 | 0.882754  | 0.388305 |
| 6  | 0.586152  | 1.919491  | 3.789082 |
| 9  | 2.345715  | -0.239090 | 0.855155 |
| 6  | -0.117223 | 1.785726  | 2.575202 |
| 6  | 0.530158  | 1.054790  | 1.565558 |
| 6  | 1.766231  | 0.500533  | 1.810435 |
| 17 | 1.224065  | -1.654460 | 5.880833 |
| 7  | -2.206334 | -0.408474 | 4.291789 |
| 9  | -1.323664 | -0.220513 | 6.351699 |
| 6  | -1.209567 | -0.678617 | 5.103989 |
| 7  | 1.101645  | -2.578857 | 2.981169 |
| 1  | 1.956524  | -2.538838 | 3.514846 |
| 1  | 1.198337  | -2.705818 | 1.985833 |
| 9  | -0.995305 | -2.018777 | 1.307432 |
| 6  | -0.067898 | -1.384274 | 4.750500 |
| 9  | -3.118315 | -0.558790 | 2.225231 |
| 6  | 0.036521  | -1.869069 | 3.431332 |
| 6  | -1.049651 | -1.591285 | 2.585274 |
| 6  | -2.115383 | -0.861109 | 3.060774 |

02\_p2

|    |           |          |           |
|----|-----------|----------|-----------|
| 17 | -0.863005 | 4.094453 | -1.158422 |
| 7  | 0.464036  | 4.880834 | 2.510723  |

|    |           |          |           |
|----|-----------|----------|-----------|
| 9  | -0.059202 | 6.194635 | 0.758763  |
| 6  | 0.041501  | 4.961155 | 1.272916  |
| 7  | -0.573173 | 1.460004 | 0.366753  |
| 1  | -1.111402 | 1.546529 | -0.480872 |
| 1  | -0.686807 | 0.607531 | 0.892486  |
| 9  | 0.298713  | 1.312138 | 2.955588  |
| 6  | -0.318672 | 3.880336 | 0.483096  |
| 9  | 0.974468  | 3.594811 | 4.299142  |
| 6  | -0.247599 | 2.589518 | 1.044812  |
| 6  | 0.211907  | 2.521137 | 2.369688  |
| 6  | 0.547780  | 3.678553 | 3.040087  |
| 17 | -4.037100 | 2.615920 | -0.057310 |
| 7  | -2.905484 | 2.098152 | 3.723355  |
| 9  | -3.498335 | 0.662414 | 2.093507  |
| 6  | -3.300041 | 1.928560 | 2.485326  |
| 7  | -3.419756 | 5.349474 | 1.166221  |
| 1  | -3.489224 | 5.196557 | 0.172523  |
| 1  | -3.034133 | 6.231665 | 1.464636  |
| 9  | -2.584615 | 5.683842 | 3.749797  |
| 6  | -3.503276 | 2.947824 | 1.567989  |
| 9  | -2.280081 | 3.508273 | 5.376614  |
| 6  | -3.254115 | 4.273629 | 1.976583  |
| 6  | -2.837255 | 4.437757 | 3.307149  |
| 6  | -2.683850 | 3.333797 | 4.119306  |

02\_p3

|    |           |           |          |
|----|-----------|-----------|----------|
| 17 | 10.512006 | 13.127173 | 5.787057 |
| 7  | 13.262880 | 13.784595 | 4.657422 |
| 1  | 12.636565 | 14.481092 | 5.031258 |
| 1  | 14.041962 | 14.128711 | 4.118598 |
| 9  | 14.646248 | 12.111613 | 2.982047 |
| 6  | 13.442282 | 11.717290 | 3.447521 |
| 6  | 12.732956 | 12.586529 | 4.288918 |
| 6  | 11.478919 | 12.127992 | 4.736281 |
| 17 | 13.206476 | 14.937359 | 1.310723 |
| 7  | 11.129946 | 16.179682 | 3.163466 |
| 1  | 11.876650 | 16.708313 | 2.738045 |
| 1  | 10.383677 | 16.723175 | 3.570196 |
| 7  | 10.054476 | 12.511964 | 1.498761 |
| 9  | 12.030853 | 12.362145 | 0.433706 |
| 9  | 8.667316  | 15.068034 | 3.620829 |
| 9  | 8.056212  | 12.625291 | 2.550411 |
| 6  | 9.535969  | 14.411587 | 2.826210 |
| 6  | 10.778173 | 15.002352 | 2.563077 |
| 6  | 11.214611 | 13.058252 | 1.227250 |
| 6  | 9.235504  | 13.180628 | 2.280330 |
| 6  | 11.640957 | 14.286767 | 1.713767 |
| 7  | 11.729500 | 10.073404 | 3.537276 |
| 9  | 9.860750  | 10.433741 | 4.737931 |



|   |           |           |          |
|---|-----------|-----------|----------|
| 9 | 13.588439 | 9.681645  | 2.310362 |
| 6 | 11.049621 | 10.874768 | 4.321664 |
| 6 | 12.899300 | 10.494634 | 3.111320 |

02\_p4

|    |          |          |           |
|----|----------|----------|-----------|
| 17 | 0.085456 | 3.906013 | -0.165570 |
| 7  | 1.759557 | 4.906741 | 3.305161  |
| 9  | 0.884283 | 6.121792 | 1.625646  |
| 6  | 1.178328 | 4.915398 | 2.129897  |
| 7  | 0.991900 | 1.360288 | 1.258847  |
| 1  | 0.768150 | 1.392976 | 0.276864  |
| 1  | 1.451098 | 0.528937 | 1.596293  |
| 9  | 2.184735 | 1.355851 | 3.720871  |
| 6  | 0.875000 | 3.788829 | 1.381389  |
| 9  | 2.665897 | 3.721522 | 5.004997  |
| 6  | 1.228314 | 2.528413 | 1.905466  |
| 6  | 1.831953 | 2.534584 | 3.173279  |
| 6  | 2.071316 | 3.732004 | 3.811870  |
| 17 | 3.526848 | 3.050353 | -0.947864 |
| 7  | 5.204335 | 1.961647 | 2.494080  |
| 9  | 4.445397 | 0.789756 | 0.726860  |
| 6  | 4.649298 | 1.981071 | 1.307525  |
| 7  | 4.088869 | 5.554866 | 0.701274  |
| 1  | 3.495116 | 5.545426 | -0.112775 |
| 1  | 4.040775 | 6.368640 | 1.293998  |
| 9  | 5.229283 | 5.493005 | 3.189556  |
| 6  | 4.251540 | 3.125723 | 0.634038  |
| 9  | 5.960826 | 3.102075 | 4.294061  |
| 6  | 4.435538 | 4.371113 | 1.267424  |
| 6  | 5.031933 | 4.332071 | 2.537704  |
| 6  | 5.392436 | 3.120403 | 3.089563  |

02\_p5

|    |           |           |           |
|----|-----------|-----------|-----------|
| 17 | 9.768098  | 18.052088 | 5.053147  |
| 7  | 10.420529 | 15.315106 | 6.250593  |
| 1  | 10.340055 | 15.474616 | 5.258764  |
| 1  | 10.816572 | 14.434125 | 6.538764  |
| 7  | 10.932329 | 18.552134 | 8.826284  |
| 9  | 10.311308 | 19.994494 | 7.212865  |
| 9  | 11.283873 | 14.969223 | 8.823347  |
| 9  | 11.585977 | 17.135501 | 10.462970 |
| 6  | 11.016307 | 16.216270 | 8.392329  |
| 6  | 10.585001 | 16.386445 | 7.067136  |
| 6  | 10.524182 | 18.727289 | 7.593446  |
| 6  | 11.168338 | 17.315597 | 9.210995  |
| 6  | 10.320601 | 17.712989 | 6.670700  |
| 17 | 12.944471 | 16.608751 | 3.912644  |
| 7  | 14.314100 | 15.807179 | 7.562807  |

|   |           |           |          |
|---|-----------|-----------|----------|
| 7 | 13.226744 | 19.234431 | 5.454224 |
| 1 | 12.681010 | 19.149444 | 4.611254 |
| 1 | 13.111047 | 20.082074 | 5.987265 |
| 9 | 13.784853 | 14.501671 | 5.806450 |
| 9 | 14.122802 | 19.371004 | 8.035427 |
| 9 | 14.831193 | 17.084542 | 9.355511 |
| 6 | 14.040510 | 18.165587 | 7.441554 |
| 6 | 13.568592 | 18.102872 | 6.120769 |
| 6 | 13.880105 | 15.732207 | 6.328634 |
| 6 | 14.392818 | 17.006263 | 8.100126 |
| 6 | 13.503004 | 16.815597 | 5.550321 |

02\_p6

|    |           |           |          |
|----|-----------|-----------|----------|
| 17 | 14.610855 | 12.107660 | 0.826336 |
| 7  | 16.029164 | 11.720844 | 3.498325 |
| 1  | 16.511389 | 11.944666 | 2.641179 |
| 1  | 16.558793 | 11.829168 | 4.349400 |
| 9  | 14.747101 | 11.851326 | 5.917243 |
| 6  | 14.029479 | 12.024328 | 4.790489 |
| 6  | 14.696141 | 11.968879 | 3.555746 |
| 6  | 13.895330 | 12.158324 | 2.410592 |
| 17 | 12.928480 | 15.783794 | 0.051332 |
| 7  | 15.742300 | 15.165034 | 2.796514 |
| 7  | 11.617239 | 15.769715 | 2.803665 |
| 1  | 11.114433 | 15.661157 | 1.935951 |
| 1  | 11.127499 | 15.479131 | 3.636400 |
| 9  | 15.815223 | 15.364048 | 0.558133 |
| 9  | 13.011825 | 15.367555 | 5.133498 |
| 9  | 15.708002 | 14.938539 | 5.047068 |
| 6  | 13.683077 | 15.384573 | 3.964033 |
| 6  | 12.960820 | 15.576913 | 2.775423 |
| 6  | 15.086343 | 15.371690 | 1.676910 |
| 6  | 15.042739 | 15.174018 | 3.910109 |
| 6  | 13.717606 | 15.575319 | 1.585615 |
| 7  | 11.938446 | 12.477209 | 3.754895 |
| 9  | 11.778939 | 12.632890 | 1.516656 |
| 9  | 12.059049 | 12.342004 | 6.008627 |
| 6  | 12.545039 | 12.411396 | 2.592259 |
| 6  | 12.675384 | 12.277822 | 4.828028 |

03\_hb

|    |           |          |           |
|----|-----------|----------|-----------|
| 17 | 10.557260 | 1.734688 | -0.026857 |
| 9  | 10.961974 | 1.726227 | 2.903717  |
| 7  | 8.808444  | 1.697603 | 3.550512  |
| 6  | 9.670634  | 1.712388 | 2.558363  |
| 17 | 5.332782  | 1.664944 | 1.608574  |
| 9  | 6.668960  | 1.668930 | 4.244417  |
| 7  | 7.566633  | 1.700836 | -0.425203 |

|    |           |          |           |
|----|-----------|----------|-----------|
| 1  | 8.221330  | 1.712087 | -1.196829 |
| 1  | 6.584598  | 1.690052 | -0.643347 |
| 6  | 9.337587  | 1.714505 | 1.215791  |
| 6  | 7.968906  | 1.699798 | 0.858686  |
| 6  | 7.047325  | 1.683934 | 1.932112  |
| 6  | 7.535402  | 1.683886 | 3.226258  |
| 17 | 11.260373 | 1.770932 | -6.259892 |
| 9  | 10.807253 | 1.752595 | -3.341836 |
| 7  | 8.558692  | 1.725657 | -3.339744 |
| 6  | 9.674540  | 1.742119 | -4.040361 |
| 17 | 5.785660  | 1.705080 | -6.194602 |
| 9  | 6.312123  | 1.698506 | -3.283138 |
| 7  | 8.509506  | 1.743465 | -7.500773 |
| 1  | 9.372408  | 1.756126 | -8.017832 |
| 1  | 7.635309  | 1.735238 | -7.998498 |
| 6  | 9.735038  | 1.748958 | -5.422300 |
| 6  | 8.525120  | 1.737698 | -6.152564 |
| 6  | 7.331450  | 1.720054 | -5.395197 |
| 6  | 7.430782  | 1.715148 | -4.017357 |

03\_pi

|    |           |           |          |
|----|-----------|-----------|----------|
| 17 | 10.418116 | 0.895626  | 1.449294 |
| 9  | 10.518124 | 1.763708  | 4.271086 |
| 7  | 8.312008  | 1.970517  | 4.645977 |
| 6  | 9.273967  | 1.685023  | 3.795863 |
| 17 | 5.063350  | 1.538167  | 2.390613 |
| 9  | 6.116244  | 2.193955  | 5.072880 |
| 7  | 7.488180  | 0.874556  | 0.710497 |
| 1  | 8.225607  | 0.442373  | 0.175866 |
| 1  | 6.543686  | 0.606376  | 0.480946 |
| 6  | 9.078228  | 1.305207  | 2.479621 |
| 6  | 7.755548  | 1.231505  | 1.988558 |
| 6  | 6.728286  | 1.573178  | 2.896557 |
| 6  | 7.080967  | 1.913240  | 4.189994 |
| 17 | 4.343177  | -0.895635 | 5.608784 |
| 9  | 4.243169  | -1.763713 | 2.786988 |
| 7  | 6.449285  | -1.970508 | 2.412096 |
| 6  | 5.487325  | -1.685023 | 3.262212 |
| 17 | 9.697943  | -1.538170 | 4.667461 |
| 9  | 8.645049  | -2.193950 | 1.985191 |
| 7  | 7.273113  | -0.874563 | 6.347580 |
| 1  | 6.535688  | -0.442363 | 6.882201 |
| 1  | 8.217605  | -0.606369 | 6.577123 |
| 6  | 5.683064  | -1.305212 | 4.578455 |
| 6  | 7.005744  | -1.231508 | 5.069516 |
| 6  | 8.033007  | -1.573181 | 4.161517 |
| 6  | 7.680326  | -1.913237 | 2.868078 |

04\_hb

|   |           |           |           |
|---|-----------|-----------|-----------|
| 9 | -0.019819 | 8.754746  | 3.863350  |
| 7 | 1.207542  | 6.500980  | 1.354509  |
| 6 | 0.928633  | 7.648239  | 1.995538  |
| 9 | -0.107199 | 4.013382  | 3.600150  |
| 7 | 1.311977  | 8.824697  | 1.449182  |
| 1 | 1.677251  | 8.842849  | 0.497364  |
| 1 | 0.998657  | 9.683769  | 1.867802  |
| 6 | 0.261926  | 7.586403  | 3.236377  |
| 9 | 1.179173  | 4.251083  | 1.187057  |
| 6 | -0.097772 | 6.386635  | 3.799585  |
| 1 | -0.608383 | 6.345991  | 4.752705  |
| 6 | 0.216187  | 5.222665  | 3.103551  |
| 6 | 0.864977  | 5.351249  | 1.890648  |
| 9 | 3.673619  | 6.504454  | -3.863350 |
| 7 | 2.446258  | 8.758220  | -1.354509 |
| 6 | 2.725167  | 7.610961  | -1.995538 |
| 9 | 3.760999  | 11.245818 | -3.600150 |
| 7 | 2.341823  | 6.434503  | -1.449182 |
| 1 | 1.976549  | 6.416351  | -0.497364 |
| 1 | 2.655143  | 5.575431  | -1.867802 |
| 6 | 3.391874  | 7.672797  | -3.236377 |
| 9 | 2.474627  | 11.008117 | -1.187057 |
| 6 | 3.751572  | 8.872565  | -3.799585 |
| 1 | 4.262183  | 8.913209  | -4.752705 |
| 6 | 3.437613  | 10.036535 | -3.103551 |
| 6 | 2.788823  | 9.907951  | -1.890648 |

04\_p1

|   |           |          |          |
|---|-----------|----------|----------|
| 9 | 0.581580  | 9.148327 | 3.597390 |
| 7 | 0.292982  | 5.984683 | 1.921883 |
| 6 | 0.411756  | 7.302379 | 2.115982 |
| 9 | 0.169296  | 4.736510 | 5.291898 |
| 7 | 0.505307  | 8.126192 | 1.024187 |
| 1 | 0.165271  | 7.714274 | 0.166679 |
| 1 | 0.207301  | 9.079139 | 1.174546 |
| 6 | 0.468302  | 7.809074 | 3.424569 |
| 9 | 0.092193  | 3.873605 | 2.700048 |
| 6 | 0.393977  | 6.972236 | 4.514892 |
| 1 | 0.420905  | 7.360914 | 5.523947 |
| 6 | 0.265704  | 5.611639 | 4.271635 |
| 6 | 0.227579  | 5.182360 | 2.953928 |
| 9 | -2.807847 | 7.716464 | 4.359050 |
| 7 | -2.717430 | 7.338736 | 0.791439 |
| 6 | -2.691274 | 7.904331 | 2.001137 |
| 9 | -3.194550 | 3.872414 | 1.604798 |
| 7 | -2.456177 | 9.261496 | 2.083862 |
| 1 | -2.718653 | 9.782406 | 1.259744 |
| 1 | -2.691962 | 9.705016 | 2.959066 |

|   |           |          |           |
|---|-----------|----------|-----------|
| 6 | -2.835030 | 7.111206 | 3.144971  |
| 9 | -2.890517 | 5.528271 | -0.545027 |
| 6 | -3.008222 | 5.746579 | 3.048492  |
| 1 | -3.118010 | 5.129078 | 3.929978  |
| 6 | -3.030760 | 5.193134 | 1.777111  |
| 6 | -2.876304 | 6.041964 | 0.690029  |

04\_p2

|   |           |          |           |
|---|-----------|----------|-----------|
| 9 | -2.350048 | 5.033703 | 26.829671 |
| 9 | -1.889370 | 5.339834 | 29.504569 |
| 9 | 2.354425  | 5.192858 | 26.211658 |
| 7 | 2.662948  | 5.463362 | 28.949285 |
| 1 | 2.688611  | 5.837118 | 29.885995 |
| 1 | 3.431198  | 5.717539 | 28.348241 |
| 7 | 0.347309  | 5.383332 | 29.181052 |
| 6 | 1.420741  | 5.353764 | 28.385042 |
| 6 | -0.846561 | 5.269817 | 28.660649 |
| 6 | -1.090553 | 5.110307 | 27.306001 |
| 6 | 1.251610  | 5.188974 | 27.001444 |
| 6 | -0.002074 | 5.066589 | 26.446131 |
| 1 | -0.136425 | 4.963040 | 25.377755 |
| 9 | 3.638984  | 8.622922 | 27.180450 |
| 9 | 2.582076  | 8.804633 | 29.692611 |
| 9 | -0.808215 | 8.253279 | 25.560227 |
| 7 | -1.730256 | 8.484764 | 28.160074 |
| 1 | -1.973862 | 8.289327 | 29.119364 |
| 1 | -2.348831 | 8.108131 | 27.458947 |
| 7 | 0.475074  | 8.655039 | 28.887967 |
| 6 | -0.390933 | 8.514895 | 27.879427 |
| 6 | 1.757533  | 8.696066 | 28.637672 |
| 6 | 2.303292  | 8.608668 | 27.367021 |
| 6 | 0.088524  | 8.425774 | 26.563264 |
| 6 | 1.437290  | 8.470358 | 26.291388 |
| 1 | 1.810668  | 8.378334 | 25.280289 |

04\_p3

|   |           |          |           |
|---|-----------|----------|-----------|
| 1 | 3.928930  | 7.459974 | 26.056225 |
| 9 | 0.240286  | 2.336349 | 23.812391 |
| 9 | -1.170596 | 4.583021 | 24.453108 |
| 9 | 3.203630  | 3.436456 | 27.355322 |
| 7 | 1.733174  | 5.726243 | 27.818226 |
| 1 | 1.020610  | 6.378294 | 28.108817 |
| 1 | 2.358672  | 5.399749 | 28.538219 |
| 7 | 0.261438  | 5.082557 | 26.129321 |
| 6 | 1.350917  | 4.822875 | 26.857853 |
| 6 | -0.076943 | 4.263365 | 25.165807 |
| 6 | 0.628134  | 3.117166 | 24.837852 |
| 6 | 2.109502  | 3.673519 | 26.592131 |

|   |          |          |           |
|---|----------|----------|-----------|
| 6 | 1.760130 | 2.809321 | 25.578942 |
| 1 | 2.357354 | 1.935988 | 25.353731 |
| 9 | 5.689658 | 5.489223 | 25.919021 |
| 9 | 5.090894 | 3.624593 | 24.007136 |
| 7 | 3.242097 | 4.764423 | 23.385102 |
| 6 | 4.291901 | 4.691440 | 24.164587 |
| 6 | 4.600903 | 5.627340 | 25.138561 |
| 6 | 2.646029 | 6.781164 | 24.476292 |
| 6 | 3.746461 | 6.709653 | 25.299630 |
| 9 | 1.765288 | 7.802971 | 24.595004 |
| 7 | 1.319297 | 5.868971 | 22.669873 |
| 1 | 1.085448 | 5.019792 | 22.178421 |
| 1 | 0.541690 | 6.442337 | 22.957742 |
| 6 | 2.398010 | 5.793242 | 23.511040 |

04\_p4

|   |          |           |           |
|---|----------|-----------|-----------|
| 9 | 3.247180 | 6.053197  | 16.929157 |
| 7 | 1.335836 | 5.670132  | 18.883038 |
| 1 | 0.866196 | 5.529461  | 19.764553 |
| 1 | 1.813248 | 4.863232  | 18.511318 |
| 6 | 1.956004 | 6.883033  | 18.732289 |
| 9 | 3.729472 | 10.550686 | 18.367793 |
| 9 | 1.824780 | 10.024880 | 20.256358 |
| 7 | 1.615546 | 7.888653  | 19.544528 |
| 6 | 2.187475 | 9.056933  | 19.397411 |
| 6 | 3.148438 | 9.333505  | 18.440316 |
| 6 | 2.915962 | 7.092497  | 17.729584 |
| 6 | 3.526379 | 8.315739  | 17.575780 |
| 1 | 4.282652 | 8.473541  | 16.818647 |
| 1 | 2.094106 | 6.785659  | 23.486606 |
| 9 | 2.647286 | 4.708514  | 21.937459 |
| 9 | 4.551978 | 5.234320  | 20.048895 |
| 7 | 4.761211 | 7.370547  | 20.760725 |
| 6 | 4.189283 | 6.202267  | 20.907842 |
| 6 | 3.228320 | 5.925695  | 21.864937 |
| 6 | 3.460796 | 8.166703  | 22.575668 |
| 6 | 2.850379 | 6.943461  | 22.729473 |
| 9 | 3.129578 | 9.206003  | 23.376096 |
| 7 | 5.040922 | 9.589068  | 21.422215 |
| 1 | 5.510562 | 9.729739  | 20.540700 |
| 1 | 4.563510 | 10.395968 | 21.793934 |
| 6 | 4.420754 | 8.376167  | 21.572963 |

05\_hb

|    |           |          |          |
|----|-----------|----------|----------|
| 17 | -1.840447 | 2.725726 | 3.974996 |
| 9  | -0.410455 | 5.104526 | 2.880559 |
| 7  | 1.455379  | 2.754488 | 0.911474 |
| 9  | -0.625398 | 0.358163 | 2.606545 |

|    |           |          |           |
|----|-----------|----------|-----------|
| 6  | 1.027135  | 3.922418 | 1.420327  |
| 7  | 1.582378  | 5.074874 | 0.987011  |
| 1  | 2.385685  | 5.045591 | 0.359743  |
| 1  | 1.329678  | 5.943622 | 1.425706  |
| 9  | 1.383083  | 0.506315 | 0.761529  |
| 6  | -0.003339 | 3.920994 | 2.380673  |
| 6  | -0.578476 | 2.737173 | 2.799739  |
| 6  | -0.110008 | 1.540023 | 2.244646  |
| 6  | 0.904820  | 1.632156 | 1.312824  |
| 17 | 7.220375  | 4.900306 | -3.974996 |
| 9  | 5.790382  | 2.521506 | -2.880559 |
| 7  | 3.924549  | 4.871544 | -0.911474 |
| 9  | 6.005325  | 7.267869 | -2.606545 |
| 6  | 4.352793  | 3.703614 | -1.420327 |
| 7  | 3.797549  | 2.551157 | -0.987011 |
| 1  | 2.994242  | 2.580441 | -0.359743 |
| 1  | 4.050250  | 1.682409 | -1.425706 |
| 9  | 3.996845  | 7.119717 | -0.761529 |
| 6  | 5.383267  | 3.705037 | -2.380673 |
| 6  | 5.958404  | 4.888859 | -2.799739 |
| 6  | 5.489936  | 6.086008 | -2.244646 |
| 6  | 4.475108  | 5.993876 | -1.312824 |

05\_p1

|    |           |          |           |
|----|-----------|----------|-----------|
| 17 | 6.038813  | 5.123674 | -4.059612 |
| 9  | 4.929565  | 2.587072 | -2.949580 |
| 7  | 3.331394  | 4.662006 | -0.496390 |
| 9  | 4.980253  | 7.297155 | -2.300176 |
| 6  | 3.721520  | 3.575488 | -1.170632 |
| 7  | 3.282748  | 2.347690 | -0.748767 |
| 1  | 2.434835  | 2.359720 | -0.198039 |
| 1  | 3.354328  | 1.590780 | -1.411360 |
| 9  | 3.320645  | 6.895914 | -0.179652 |
| 6  | 4.576364  | 3.699114 | -2.274266 |
| 6  | 5.017878  | 4.947028 | -2.682137 |
| 6  | 4.596197  | 6.062752 | -1.956663 |
| 6  | 3.754449  | 5.839759 | -0.877975 |
| 17 | 2.260607  | 4.880592 | -4.849742 |
| 9  | 1.237875  | 2.548038 | -3.291037 |
| 7  | -0.033659 | 4.981332 | -0.980131 |
| 9  | 1.447824  | 7.296596 | -3.290501 |
| 6  | 0.269449  | 3.808034 | -1.536550 |
| 7  | -0.054496 | 2.651892 | -0.850410 |
| 1  | -0.750296 | 2.791319 | -0.130611 |
| 1  | -0.198473 | 1.825936 | -1.413682 |
| 9  | 0.028191  | 7.236627 | -0.970980 |
| 6  | 0.962047  | 3.753688 | -2.748689 |
| 6  | 1.376394  | 4.922089 | -3.370375 |
| 6  | 1.069057  | 6.133528 | -2.752283 |

|       |    |          |           |           |
|-------|----|----------|-----------|-----------|
|       | 6  | 0.353893 | 6.086227  | -1.562667 |
| 05_p2 |    |          |           |           |
|       | 7  | 4.201265 | 8.231256  | 7.262273  |
|       | 6  | 5.322660 | 8.144254  | 6.539037  |
|       | 7  | 6.409245 | 7.512703  | 7.079801  |
|       | 1  | 6.393437 | 7.405923  | 8.082673  |
|       | 1  | 7.310951 | 7.708984  | 6.673515  |
|       | 9  | 2.055859 | 8.889806  | 7.514895  |
|       | 6  | 3.148620 | 8.807965  | 6.738999  |
|       | 17 | 4.311038 | 9.988751  | 3.120789  |
|       | 9  | 6.525473 | 8.599407  | 4.554473  |
|       | 6  | 5.368277 | 8.672926  | 5.240619  |
|       | 6  | 4.258291 | 9.294035  | 4.695565  |
|       | 6  | 3.097488 | 9.359572  | 5.471090  |
|       | 7  | 4.638723 | 12.237107 | 6.445533  |
|       | 6  | 4.926550 | 11.536851 | 7.547486  |
|       | 7  | 3.971756 | 11.416304 | 8.519265  |
|       | 1  | 3.033681 | 11.659889 | 8.238597  |
|       | 1  | 4.050896 | 10.640045 | 9.158262  |
|       | 9  | 5.214872 | 13.107335 | 4.444887  |
|       | 6  | 5.552589 | 12.391541 | 5.521889  |
|       | 17 | 8.726708 | 10.409283 | 6.890541  |
|       | 9  | 6.462276 | 10.264045 | 8.827197  |
|       | 9  | 1.991120 | 9.954991  | 5.013311  |
|       | 6  | 6.199882 | 10.971388 | 7.709088  |
|       | 6  | 7.161976 | 11.123230 | 6.724759  |
|       | 6  | 6.831728 | 11.859261 | 5.585982  |
|       | 9  | 7.713980 | 12.037793 | 4.597172  |
| 05_p3 |    |          |           |           |
|       | 7  | 3.841030 | 13.577333 | 7.550591  |
|       | 6  | 4.610351 | 12.662307 | 6.953040  |
|       | 7  | 4.234515 | 11.351890 | 7.013862  |
|       | 1  | 3.295502 | 11.152632 | 7.318632  |
|       | 1  | 4.700845 | 10.674785 | 6.433697  |
|       | 9  | 3.428567 | 15.704221 | 8.183869  |
|       | 6  | 4.229082 | 14.828334 | 7.565505  |
|       | 17 | 7.685627 | 14.848365 | 5.584505  |
|       | 9  | 6.548060 | 12.093295 | 5.720169  |
|       | 6  | 5.807554 | 13.040574 | 6.327063  |
|       | 6  | 6.214873 | 14.362549 | 6.343097  |
|       | 6  | 5.401724 | 15.293276 | 6.993505  |
|       | 9  | 4.168343 | 10.755905 | 10.505184 |
|       | 17 | 3.545866 | 13.543409 | 11.395795 |
|       | 9  | 5.872948 | 15.197823 | 10.523395 |
|       | 6  | 5.963310 | 13.887066 | 10.218439 |
|       | 6  | 4.956957 | 13.002411 | 10.570883 |



|   |          |           |           |
|---|----------|-----------|-----------|
| 6 | 5.113484 | 11.661460 | 10.219357 |
| 7 | 7.211245 | 12.144498 | 9.192973  |
| 6 | 7.085714 | 13.437618 | 9.512255  |
| 7 | 8.044254 | 14.313311 | 9.083771  |
| 1 | 8.909380 | 13.913940 | 8.756629  |
| 1 | 8.080939 | 15.232340 | 9.493371  |
| 9 | 6.434008 | 10.025475 | 9.189020  |
| 6 | 6.266017 | 11.307886 | 9.537508  |
| 9 | 5.750757 | 16.584716 | 7.064492  |

05\_p4

|    |          |           |          |
|----|----------|-----------|----------|
| 9  | 4.243382 | 9.193383  | 4.093247 |
| 17 | 2.399271 | 11.526339 | 3.782257 |
| 9  | 4.001362 | 13.632294 | 2.398889 |
| 6  | 4.656121 | 12.475311 | 2.615034 |
| 6  | 4.035119 | 11.413672 | 3.250038 |
| 6  | 4.778453 | 10.250510 | 3.461608 |
| 7  | 4.519384 | 13.449646 | 5.933229 |
| 6  | 5.202681 | 12.319967 | 6.143049 |
| 7  | 4.576424 | 11.283256 | 6.776438 |
| 1  | 3.569403 | 11.331224 | 6.804394 |
| 1  | 4.978466 | 10.362802 | 6.692350 |
| 9  | 4.381786 | 15.561578 | 5.146606 |
| 6  | 5.108588 | 14.455609 | 5.339641 |
| 7  | 6.679455 | 11.243351 | 2.422437 |
| 6  | 5.996151 | 12.373027 | 2.212618 |
| 7  | 6.622403 | 13.409741 | 1.579227 |
| 1  | 7.629424 | 13.361781 | 1.551274 |
| 1  | 6.220354 | 14.330193 | 1.663314 |
| 9  | 6.817065 | 9.131420  | 3.209060 |
| 6  | 6.090257 | 10.237386 | 3.016027 |
| 17 | 8.799568 | 13.166637 | 4.573415 |
| 9  | 7.197462 | 11.060688 | 5.956777 |
| 6  | 6.542712 | 12.217677 | 5.740635 |
| 6  | 7.163720 | 13.279312 | 5.105633 |
| 6  | 6.420392 | 14.442478 | 4.894062 |
| 9  | 6.955470 | 15.499604 | 4.262426 |

06\_hb

|   |          |          |          |
|---|----------|----------|----------|
| 6 | 5.442506 | 1.229005 | 5.235400 |
| 6 | 6.576873 | 1.822570 | 4.718166 |
| 6 | 6.451505 | 2.963156 | 3.920610 |
| 6 | 5.158709 | 3.441733 | 3.687248 |
| 6 | 4.095116 | 2.763433 | 4.258756 |
| 7 | 4.229220 | 1.687057 | 5.008162 |
| 9 | 5.553608 | 0.149825 | 6.002718 |
| 9 | 7.811685 | 1.344515 | 4.956686 |
| 8 | 7.500234 | 3.596470 | 3.385644 |

|   |           |           |           |
|---|-----------|-----------|-----------|
| 1 | 8.321861  | 3.155247  | 3.641674  |
| 9 | 4.967998  | 4.525958  | 2.936977  |
| 9 | 2.859135  | 3.207820  | 4.059355  |
| 6 | 2.474799  | 2.169964  | 9.739014  |
| 6 | 2.730566  | 1.879771  | 8.410814  |
| 6 | 1.902063  | 0.978745  | 7.730826  |
| 6 | 0.848992  | 0.427329  | 8.474604  |
| 6 | 0.698820  | 0.799241  | 9.799485  |
| 7 | 1.486714  | 1.646745  | 10.421672 |
| 9 | 3.276170  | 3.032787  | 10.372842 |
| 9 | 3.763743  | 2.452262  | 7.756123  |
| 8 | 2.049541  | 0.624479  | 6.457989  |
| 1 | 2.823755  | 1.049797  | 6.024437  |
| 9 | 0.012694  | -0.442464 | 7.897578  |
| 9 | -0.305750 | 0.270754  | 10.503147 |

06\_p1

|   |          |          |          |
|---|----------|----------|----------|
| 6 | 4.683389 | 1.646412 | 5.439708 |
| 6 | 5.229571 | 1.946165 | 4.204115 |
| 6 | 5.570219 | 3.268162 | 3.907618 |
| 6 | 5.333326 | 4.222857 | 4.900966 |
| 6 | 4.771559 | 3.797280 | 6.093413 |
| 7 | 4.458708 | 2.552147 | 6.362030 |
| 9 | 4.365710 | 0.384481 | 5.719320 |
| 9 | 5.442051 | 1.008885 | 3.261193 |
| 8 | 6.094447 | 3.642086 | 2.735590 |
| 1 | 6.115089 | 2.889526 | 2.128727 |
| 9 | 5.619711 | 5.509220 | 4.682366 |
| 9 | 4.503747 | 4.710398 | 7.034475 |
| 6 | 2.526213 | 5.816288 | 3.744500 |
| 6 | 1.980031 | 5.516535 | 4.980093 |
| 6 | 1.639383 | 4.194538 | 5.276590 |
| 6 | 1.876276 | 3.239843 | 4.283242 |
| 6 | 2.438043 | 3.665420 | 3.090795 |
| 7 | 2.750894 | 4.910553 | 2.822178 |
| 9 | 2.843892 | 7.078219 | 3.464888 |
| 9 | 1.767550 | 6.453815 | 5.923015 |
| 8 | 1.115155 | 3.820614 | 6.448618 |
| 1 | 1.094513 | 4.573174 | 7.055481 |
| 9 | 1.589891 | 1.953480 | 4.501842 |
| 9 | 2.705855 | 2.752302 | 2.149733 |

06\_p2

|   |          |          |          |
|---|----------|----------|----------|
| 6 | 5.602341 | 1.232204 | 4.863336 |
| 6 | 6.385167 | 1.434587 | 3.740727 |
| 6 | 6.635341 | 2.738131 | 3.310912 |
| 6 | 6.060725 | 3.771993 | 4.052485 |
| 6 | 5.302300 | 3.440423 | 5.163156 |

|   |           |           |          |
|---|-----------|-----------|----------|
| 7 | 5.073179  | 2.211523  | 5.556836 |
| 9 | 5.368458  | -0.014063 | 5.272632 |
| 9 | 6.939383  | 0.419523  | 3.050150 |
| 8 | 7.409468  | 3.028629  | 2.255931 |
| 1 | 7.783438  | 2.217433  | 1.885252 |
| 9 | 6.274006  | 5.048317  | 3.704829 |
| 9 | 4.774883  | 4.429749  | 5.891279 |
| 6 | 9.625061  | 6.230496  | 4.320872 |
| 6 | 8.842234  | 6.028113  | 5.443481 |
| 6 | 8.592061  | 4.724569  | 5.873296 |
| 6 | 9.166677  | 3.690707  | 5.131723 |
| 6 | 9.925102  | 4.022277  | 4.021052 |
| 7 | 10.154223 | 5.251177  | 3.627372 |
| 9 | 9.858943  | 7.476763  | 3.911576 |
| 9 | 8.288018  | 7.043177  | 6.134059 |
| 8 | 7.817934  | 4.434071  | 6.928277 |
| 1 | 7.443964  | 5.245267  | 7.298957 |
| 9 | 8.953396  | 2.414383  | 5.479379 |
| 9 | 10.452519 | 3.032951  | 3.292929 |

07\_hb

|   |           |           |           |
|---|-----------|-----------|-----------|
| 9 | -1.768523 | 1.174225  | 3.742917  |
| 7 | -0.621439 | -1.060957 | 1.186319  |
| 6 | -0.888794 | 0.076701  | 1.836114  |
| 9 | -1.838116 | -3.549643 | 3.472856  |
| 1 | -0.154675 | 1.149169  | 0.418897  |
| 6 | -1.504613 | 0.028040  | 3.099420  |
| 9 | -0.636810 | -3.314310 | 1.020878  |
| 6 | -1.833475 | -1.181454 | 3.670495  |
| 1 | -2.307504 | -1.226668 | 4.642229  |
| 6 | -1.540303 | -2.343121 | 2.965430  |
| 6 | -0.934994 | -2.223446 | 1.730029  |
| 9 | 1.768523  | -1.174225 | -3.742917 |
| 7 | 0.621439  | 1.060957  | -1.186319 |
| 6 | 0.888794  | -0.076701 | -1.836114 |
| 9 | 1.838116  | 3.549643  | -3.472856 |
| 1 | 0.154675  | -1.149169 | -0.418897 |
| 6 | 1.504613  | -0.028040 | -3.099420 |
| 9 | 0.636810  | 3.314310  | -1.020878 |
| 6 | 1.833475  | 1.181454  | -3.670495 |
| 1 | 2.307504  | 1.226668  | -4.642229 |
| 6 | 1.540303  | 2.343121  | -2.965430 |
| 6 | 0.934994  | 2.223446  | -1.730029 |
| 8 | -0.583247 | 1.250359  | 1.309886  |
| 8 | 0.583247  | -1.250359 | -1.309886 |

07\_p1

|   |          |          |           |
|---|----------|----------|-----------|
| 9 | 2.748523 | 2.171608 | -0.515565 |
|---|----------|----------|-----------|

|   |           |           |           |
|---|-----------|-----------|-----------|
| 7 | 0.576092  | -0.516467 | -1.468404 |
| 6 | 1.140636  | 0.681698  | -1.418562 |
| 9 | 2.420994  | -2.285433 | 1.047506  |
| 1 | -0.114487 | 1.328952  | -2.659682 |
| 6 | 2.198287  | 0.949085  | -0.543720 |
| 9 | 0.388454  | -2.650428 | -0.742886 |
| 6 | 2.652660  | -0.044091 | 0.301148  |
| 1 | 3.453306  | 0.145525  | 1.003399  |
| 6 | 2.036837  | -1.285568 | 0.236917  |
| 6 | 1.005370  | -1.466142 | -0.671313 |
| 9 | 0.180077  | 0.692144  | 2.606287  |
| 7 | -1.850080 | 1.289223  | -0.290301 |
| 6 | -0.976189 | 1.480483  | 0.689323  |
| 9 | -2.987178 | -2.043212 | 0.392696  |
| 1 | -0.512461 | 3.157182  | -0.028358 |
| 6 | -0.726837 | 0.482540  | 1.636365  |
| 9 | -3.342775 | -0.001246 | -1.390930 |
| 6 | -1.400744 | -0.721037 | 1.559136  |
| 1 | -1.215583 | -1.510703 | 2.275301  |
| 6 | -2.308765 | -0.894534 | 0.525262  |
| 6 | -2.488394 | 0.145570  | -0.374110 |
| 8 | 0.667467  | 1.668362  | -2.201380 |
| 8 | -0.304500 | 2.641532  | 0.763381  |

07\_p2

|   |           |           |           |
|---|-----------|-----------|-----------|
| 9 | -0.095218 | -1.796272 | -3.177448 |
| 1 | -3.164291 | -2.099065 | -1.173911 |
| 6 | -1.699304 | -1.011436 | -1.615806 |
| 9 | 0.426834  | 2.416883  | -1.082759 |
| 9 | -1.909868 | 1.922404  | 0.251985  |
| 7 | -2.130870 | -0.081158 | -0.775542 |
| 6 | -1.437405 | 1.022713  | -0.617992 |
| 6 | -0.254760 | 1.277425  | -1.292356 |
| 6 | -0.513523 | -0.837458 | -2.339357 |
| 6 | 0.221219  | 0.319757  | -2.176973 |
| 1 | 1.149994  | 0.467853  | -2.711375 |
| 1 | -1.149994 | -0.467853 | 2.711375  |
| 9 | -0.426834 | -2.416883 | 1.082759  |
| 9 | 1.909868  | -1.922404 | -0.251985 |
| 7 | 2.130870  | 0.081158  | 0.775542  |
| 6 | 1.437405  | -1.022713 | 0.617992  |
| 6 | 0.254760  | -1.277425 | 1.292356  |
| 6 | 0.513523  | 0.837458  | 2.339357  |
| 6 | -0.221219 | -0.319757 | 2.176973  |
| 9 | 0.095218  | 1.796272  | 3.177448  |
| 1 | 3.164291  | 2.099065  | 1.173911  |
| 6 | 1.699304  | 1.011436  | 1.615806  |
| 8 | -2.408453 | -2.139846 | -1.775466 |
| 8 | 2.408453  | 2.139846  | 1.775466  |

07\_p3

|   |           |           |           |
|---|-----------|-----------|-----------|
| 9 | -3.484058 | -0.372604 | -0.714203 |
| 9 | -1.878867 | 0.709937  | -2.642097 |
| 9 | -0.598946 | 1.558675  | 2.506653  |
| 1 | 1.326818  | 2.792623  | -0.371982 |
| 7 | -0.521024 | 1.616463  | -1.077318 |
| 6 | -0.191371 | 1.834344  | 0.186882  |
| 6 | -1.592203 | 0.909119  | -1.354288 |
| 6 | -2.413845 | 0.368350  | -0.377371 |
| 6 | -0.967501 | 1.330615  | 1.235939  |
| 6 | -2.096418 | 0.587029  | 0.954895  |
| 1 | -2.699236 | 0.166902  | 1.748631  |
| 9 | 3.484014  | 0.372696  | -0.714127 |
| 9 | 1.878583  | -0.709408 | -2.642068 |
| 9 | 0.599225  | -1.559202 | 2.506649  |
| 1 | -1.326923 | -2.792434 | -0.372040 |
| 7 | 0.520887  | -1.616216 | -1.077325 |
| 6 | 0.191375  | -1.834360 | 0.186866  |
| 6 | 1.592057  | -0.908845 | -1.354267 |
| 6 | 2.413820  | -0.368299 | -0.377330 |
| 6 | 0.967638  | -1.330876 | 1.235942  |
| 6 | 2.096537  | -0.587251 | 0.954927  |
| 1 | 2.699455  | -0.167306 | 1.748683  |
| 8 | 0.920752  | 2.536835  | 0.468122  |
| 8 | -0.920741 | -2.536874 | 0.468077  |

## F Computed IR and Raman Spectra of aggregates

01\_hb

| NM# | Symm | Wavenumber | Force Const | IR Intens | Raman Activ |
|-----|------|------------|-------------|-----------|-------------|
| 1   | A    | 4.4427     | 0.0001      | 0.0519    | 0.2390      |
| 2   | A    | 10.9179    | 0.0009      | 0.4137    | 0.0473      |
| 3   | A    | 17.5223    | 0.0022      | 0.2093    | 0.1013      |
| 4   | A    | 22.0400    | 0.0034      | 0.4650    | 6.6189      |
| 5   | A    | 40.8117    | 0.0135      | 0.4462    | 0.0422      |
| 6   | A    | 64.1630    | 0.0306      | 1.8617    | 0.6608      |
| 7   | A    | 122.1700   | 0.1595      | 0.0836    | 0.0113      |
| 8   | A    | 123.3566   | 0.1624      | 0.0124    | 0.0034      |
| 9   | A    | 144.9176   | 0.1645      | 13.9900   | 0.9475      |
| 10  | A    | 147.0769   | 0.1768      | 6.7516    | 0.4027      |
| 11  | A    | 195.1203   | 0.0302      | 146.2161  | 2.1811      |
| 12  | A    | 207.3506   | 0.3427      | 4.8801    | 0.8773      |
| 13  | A    | 211.7417   | 0.1221      | 84.0229   | 1.6385      |
| 14  | A    | 275.2013   | 0.1971      | 4.1355    | 1.0273      |
| 15  | A    | 280.5992   | 0.7376      | 1.7933    | 0.2413      |
| 16  | A    | 280.8879   | 0.7303      | 2.5219    | 0.5640      |
| 17  | A    | 288.9790   | 0.3193      | 5.9109    | 1.2475      |
| 18  | A    | 313.0363   | 0.5388      | 0.1242    | 0.1093      |
| 19  | A    | 319.4163   | 0.3787      | 2.2653    | 0.9890      |
| 20  | A    | 333.8756   | 0.1848      | 58.9736   | 1.6521      |
| 21  | A    | 341.4539   | 0.6739      | 0.3139    | 0.8745      |
| 22  | A    | 348.5275   | 1.0502      | 7.6168    | 0.8192      |
| 23  | A    | 351.0430   | 0.9460      | 0.7131    | 0.0695      |
| 24  | A    | 356.1001   | 0.1274      | 95.6285   | 0.8966      |
| 25  | A    | 413.2233   | 0.3038      | 0.5823    | 1.9044      |
| 26  | A    | 434.1468   | 0.8461      | 10.4698   | 2.0771      |
| 27  | A    | 463.5166   | 1.9098      | 0.3122    | 5.9188      |
| 28  | A    | 464.3676   | 1.9162      | 0.2443    | 4.3727      |
| 29  | A    | 484.8410   | 1.2201      | 0.7688    | 3.1369      |
| 30  | A    | 485.0346   | 0.1998      | 2.0754    | 0.2260      |
| 31  | A    | 488.2133   | 1.7539      | 5.5083    | 9.7663      |
| 32  | A    | 604.1159   | 0.2836      | 7.3344    | 3.7151      |
| 33  | A    | 611.1164   | 1.8861      | 1.1752    | 6.3861      |
| 34  | A    | 612.2054   | 1.6951      | 19.9354   | 43.2045     |
| 35  | A    | 644.6040   | 2.7225      | 0.0310    | 0.8470      |
| 36  | A    | 653.7826   | 1.1039      | 32.8349   | 0.7073      |
| 37  | A    | 671.3686   | 3.0919      | 0.2077    | 0.0077      |
| 38  | A    | 673.3363   | 3.2340      | 0.0027    | 0.0150      |
| 39  | A    | 696.9129   | 4.2442      | 1.4846    | 16.9522     |
| 40  | A    | 708.5964   | 4.3795      | 0.0321    | 30.9542     |
| 41  | A    | 718.1731   | 1.9282      | 1.0712    | 0.5899      |
| 42  | A    | 721.0441   | 3.3693      | 8.2220    | 0.8965      |
| 43  | A    | 723.1918   | 1.9856      | 0.2587    | 0.0627      |
| 44  | A    | 727.9234   | 3.2900      | 3.5588    | 0.7828      |

|    |   |           |         |           |          |
|----|---|-----------|---------|-----------|----------|
| 45 | A | 907.6123  | 1.9803  | 35.7590   | 0.6973   |
| 46 | A | 913.7069  | 2.0455  | 220.6194  | 0.1648   |
| 47 | A | 1117.1141 | 3.3530  | 111.0556  | 0.7904   |
| 48 | A | 1119.5358 | 5.1095  | 346.2021  | 0.5024   |
| 49 | A | 1122.6890 | 4.5164  | 75.5952   | 0.7891   |
| 50 | A | 1130.1270 | 4.0013  | 94.7179   | 0.3307   |
| 51 | A | 1176.3749 | 2.1719  | 58.5883   | 4.5658   |
| 52 | A | 1182.8975 | 2.6381  | 39.2905   | 0.9006   |
| 53 | A | 1285.2533 | 9.2567  | 56.1517   | 11.9285  |
| 54 | A | 1289.4379 | 9.0314  | 104.1011  | 16.6648  |
| 55 | A | 1374.0424 | 9.1348  | 32.2539   | 12.8882  |
| 56 | A | 1375.8922 | 9.0905  | 46.0526   | 23.5670  |
| 57 | A | 1426.6262 | 14.3143 | 37.5378   | 4.3352   |
| 58 | A | 1430.2734 | 14.0824 | 14.0781   | 15.8561  |
| 59 | A | 1503.2025 | 15.6963 | 284.7698  | 3.1824   |
| 60 | A | 1512.3601 | 14.7962 | 800.2048  | 8.8076   |
| 61 | A | 1558.4149 | 6.8978  | 149.1349  | 0.3033   |
| 62 | A | 1561.8142 | 8.6408  | 84.7056   | 0.6995   |
| 63 | A | 1637.4457 | 9.1214  | 4.4908    | 0.3187   |
| 64 | A | 1638.2182 | 5.9451  | 2.4948    | 1.7607   |
| 65 | A | 1641.3922 | 3.3907  | 36.4479   | 1.7850   |
| 66 | A | 1657.1614 | 3.3502  | 1.3143    | 4.0200   |
| 67 | A | 1681.4426 | 6.3413  | 1037.2176 | 68.3644  |
| 68 | A | 1689.8050 | 5.9339  | 46.6644   | 6.8813   |
| 69 | A | 3512.2484 | 7.6851  | 859.0743  | 635.0141 |
| 70 | A | 3612.4392 | 8.0353  | 135.0547  | 157.2678 |
| 71 | A | 3695.7527 | 8.8127  | 112.3673  | 49.3691  |
| 72 | A | 3732.2215 | 9.0757  | 79.0888   | 39.4179  |

-----

01\_pi

| NM# | Symm | Wavenumber | Force Const | IR Intens | Raman Activ |
|-----|------|------------|-------------|-----------|-------------|
| 1   | A    | 19.8372    | 0.0028      | 1.5549    | 0.0000      |
| 2   | A    | 36.5329    | 0.0082      | 0.0000    | 3.7975      |
| 3   | A    | 42.5516    | 0.0145      | 0.0000    | 2.4971      |
| 4   | A    | 46.5244    | 0.0186      | 0.9200    | 0.0000      |
| 5   | A    | 56.6513    | 0.0155      | 10.1446   | 0.0000      |
| 6   | A    | 77.0267    | 0.0417      | 0.0000    | 0.8049      |
| 7   | A    | 124.2709   | 0.1620      | 0.1726    | 0.0000      |
| 8   | A    | 128.6117   | 0.1726      | 0.0000    | 0.0598      |
| 9   | A    | 158.5541   | 0.1057      | 0.0000    | 0.3207      |
| 10  | A    | 159.6622   | 0.1184      | 7.3412    | 0.0000      |
| 11  | A    | 211.5229   | 0.2619      | 3.3367    | 0.0000      |
| 12  | A    | 222.8813   | 0.3138      | 0.0000    | 1.4252      |
| 13  | A    | 276.5630   | 0.1973      | 0.0000    | 1.1579      |
| 14  | A    | 277.0240   | 0.1961      | 8.4770    | 0.0000      |
| 15  | A    | 280.6686   | 0.7960      | 1.6702    | 0.0000      |
| 16  | A    | 281.3403   | 0.7880      | 0.0000    | 0.3216      |

|    |   |           |         |           |         |
|----|---|-----------|---------|-----------|---------|
| 17 | A | 312.7605  | 0.5067  | 0.7494    | 0.0000  |
| 18 | A | 313.2835  | 0.5154  | 0.0000    | 0.3666  |
| 19 | A | 345.3158  | 0.6332  | 0.0000    | 0.8031  |
| 20 | A | 346.4117  | 0.8258  | 5.9560    | 0.0000  |
| 21 | A | 349.3820  | 0.9128  | 0.0000    | 0.7834  |
| 22 | A | 350.9096  | 0.8987  | 0.2795    | 0.0000  |
| 23 | A | 394.0415  | 0.1330  | 0.0000    | 2.4440  |
| 24 | A | 395.1145  | 0.1290  | 30.2237   | 0.0000  |
| 25 | A | 462.3464  | 0.5324  | 7.7208    | 0.0000  |
| 26 | A | 463.3219  | 0.4095  | 0.0000    | 3.4055  |
| 27 | A | 464.3561  | 0.9909  | 5.9606    | 0.0000  |
| 28 | A | 464.5270  | 1.6064  | 0.0000    | 6.1057  |
| 29 | A | 480.0715  | 0.5986  | 162.5542  | 0.0000  |
| 30 | A | 482.8071  | 1.0560  | 0.0000    | 6.0403  |
| 31 | A | 502.4135  | 0.2417  | 596.2509  | 0.0000  |
| 32 | A | 516.8629  | 0.2261  | 0.0000    | 5.7781  |
| 33 | A | 611.6141  | 1.8450  | 32.4582   | 0.0000  |
| 34 | A | 611.9284  | 1.7875  | 0.0000    | 33.9210 |
| 35 | A | 641.8200  | 2.9878  | 0.0000    | 0.8356  |
| 36 | A | 644.1038  | 2.9328  | 13.4600   | 0.0000  |
| 37 | A | 674.9983  | 3.2694  | 0.2111    | 0.0000  |
| 38 | A | 675.2891  | 3.2635  | 0.0000    | 0.4690  |
| 39 | A | 700.6529  | 4.2357  | 8.5494    | 0.0000  |
| 40 | A | 700.8051  | 4.1960  | 0.0000    | 16.8820 |
| 41 | A | 720.9087  | 2.1121  | 0.3748    | 0.0000  |
| 42 | A | 721.5708  | 2.1222  | 0.0000    | 0.2074  |
| 43 | A | 726.5257  | 3.7805  | 0.0000    | 1.6920  |
| 44 | A | 727.4431  | 3.7834  | 25.5827   | 0.0000  |
| 45 | A | 915.9069  | 2.3163  | 0.0000    | 0.1958  |
| 46 | A | 920.8956  | 2.2529  | 230.7586  | 0.0000  |
| 47 | A | 1108.5577 | 6.4605  | 0.0000    | 0.3858  |
| 48 | A | 1121.1283 | 6.5427  | 252.9496  | 0.0000  |
| 49 | A | 1126.1502 | 4.5682  | 89.4154   | 0.0000  |
| 50 | A | 1130.3407 | 3.5135  | 0.0000    | 0.9135  |
| 51 | A | 1196.3537 | 1.8557  | 110.6066  | 0.0000  |
| 52 | A | 1198.6662 | 2.0679  | 0.0000    | 1.2873  |
| 53 | A | 1287.8871 | 9.3005  | 90.0309   | 0.0000  |
| 54 | A | 1289.8381 | 8.9715  | 0.0000    | 13.3196 |
| 55 | A | 1377.3442 | 7.9863  | 35.4616   | 0.0000  |
| 56 | A | 1378.9703 | 7.9781  | 0.0000    | 17.7600 |
| 57 | A | 1428.6035 | 14.2659 | 56.7690   | 0.0000  |
| 58 | A | 1429.6568 | 14.5959 | 0.0000    | 8.6879  |
| 59 | A | 1500.3352 | 15.5163 | 0.0000    | 5.1347  |
| 60 | A | 1510.7178 | 16.1200 | 1038.0541 | 0.0000  |
| 61 | A | 1551.2463 | 9.1286  | 154.9279  | 0.0000  |
| 62 | A | 1554.3856 | 8.5734  | 0.0000    | 1.5270  |
| 63 | A | 1641.6815 | 6.1088  | 3.8662    | 0.0000  |
| 64 | A | 1643.0815 | 7.3394  | 0.0000    | 2.0138  |
| 65 | A | 1644.3903 | 3.1965  | 6.1403    | 0.0000  |
| 66 | A | 1645.1681 | 3.2401  | 0.0000    | 1.3134  |



|    |   |           |        |          |          |
|----|---|-----------|--------|----------|----------|
| 67 | A | 1681.3118 | 5.5909 | 0.0000   | 29.9373  |
| 68 | A | 1687.6251 | 6.4244 | 586.6268 | 0.0000   |
| 69 | A | 3582.8854 | 7.9140 | 175.1541 | 0.0047   |
| 70 | A | 3583.0478 | 7.9144 | 0.0041   | 197.8338 |
| 71 | A | 3690.0933 | 8.8456 | 0.0093   | 52.5223  |
| 72 | A | 3690.1896 | 8.8463 | 114.2279 | 0.0043   |

02\_h1

| NM# | Symm | Wavenumber | Force Const | IR Intens | Raman Activ |
|-----|------|------------|-------------|-----------|-------------|
| 1   | A    | 6.2129     | 0.0002      | 1.9036    | 0.1518      |
| 2   | A    | 11.9727    | 0.0005      | 18.9595   | 0.1240      |
| 3   | A    | 13.6468    | 0.0002      | 139.0861  | 0.0865      |
| 4   | A    | 23.9462    | 0.0048      | 0.0355    | 0.2500      |
| 5   | A    | 24.9930    | 0.0045      | 0.4287    | 6.9757      |
| 6   | A    | 42.7451    | 0.0182      | 0.4578    | 0.0604      |
| 7   | A    | 60.3720    | 0.0286      | 1.2308    | 0.5101      |
| 8   | A    | 97.9702    | 0.1074      | 0.1094    | 0.0355      |
| 9   | A    | 101.8126   | 0.0566      | 10.1666   | 0.0967      |
| 10  | A    | 133.5242   | 0.1655      | 1.3151    | 0.1176      |
| 11  | A    | 146.6950   | 0.0429      | 37.0029   | 0.1789      |
| 12  | A    | 207.0977   | 0.3288      | 4.5905    | 1.7556      |
| 13  | A    | 207.8604   | 0.2827      | 0.3336    | 0.1162      |
| 14  | A    | 220.6175   | 0.5012      | 0.4411    | 2.3472      |
| 15  | A    | 223.3779   | 0.4964      | 0.5115    | 0.7600      |
| 16  | A    | 290.6509   | 0.4327      | 2.9379    | 0.4026      |
| 17  | A    | 292.8978   | 0.6503      | 2.6900    | 0.1072      |
| 18  | A    | 314.0104   | 0.3322      | 1.3424    | 0.6562      |
| 19  | A    | 315.7584   | 0.5923      | 10.3181   | 0.0838      |
| 20  | A    | 321.7133   | 0.3639      | 1.8660    | 0.4499      |
| 21  | A    | 321.8164   | 0.5126      | 4.7632    | 0.4344      |
| 22  | A    | 336.7097   | 0.8403      | 4.5364    | 3.0307      |
| 23  | A    | 339.0814   | 0.7203      | 1.2905    | 1.3482      |
| 24  | A    | 368.2903   | 0.0990      | 121.5713  | 0.2840      |
| 25  | A    | 395.0585   | 0.4668      | 1.1485    | 0.7280      |
| 26  | A    | 406.8249   | 1.2113      | 1.4637    | 6.4256      |
| 27  | A    | 408.8079   | 1.2049      | 2.0525    | 4.2177      |
| 28  | A    | 410.2465   | 0.5220      | 12.0030   | 0.8133      |
| 29  | A    | 476.2225   | 1.8196      | 0.3762    | 1.2842      |
| 30  | A    | 477.0491   | 1.8354      | 5.0094    | 9.6347      |
| 31  | A    | 507.0869   | 0.1754      | 0.1809    | 0.0620      |
| 32  | A    | 606.7000   | 0.2438      | 5.2957    | 0.1706      |
| 33  | A    | 609.7521   | 2.0875      | 2.1786    | 0.9433      |
| 34  | A    | 612.4722   | 2.1320      | 15.1541   | 67.5681     |
| 35  | A    | 632.8412   | 3.6384      | 5.6019    | 5.5449      |
| 36  | A    | 642.8598   | 3.6543      | 3.2794    | 17.7267     |
| 37  | A    | 657.4651   | 2.5563      | 1.9307    | 0.1394      |
| 38  | A    | 661.5257   | 1.8026      | 20.0283   | 1.2065      |

|    |   |           |         |           |          |
|----|---|-----------|---------|-----------|----------|
| 39 | A | 679.0444  | 3.2401  | 0.0293    | 0.0952   |
| 40 | A | 679.1780  | 3.1697  | 3.0370    | 0.0353   |
| 41 | A | 699.1146  | 1.6420  | 2.5286    | 1.1624   |
| 42 | A | 703.4229  | 1.6799  | 1.0950    | 0.1412   |
| 43 | A | 750.2851  | 3.8333  | 5.5449    | 0.3009   |
| 44 | A | 759.9737  | 3.8458  | 8.7805    | 0.1514   |
| 45 | A | 842.4246  | 2.5415  | 61.3171   | 8.1811   |
| 46 | A | 848.9125  | 2.6820  | 142.1028  | 1.6430   |
| 47 | A | 1074.4173 | 4.1415  | 54.0928   | 0.8434   |
| 48 | A | 1078.9893 | 4.8640  | 87.7291   | 3.1903   |
| 49 | A | 1109.8634 | 1.6204  | 109.8830  | 0.5312   |
| 50 | A | 1114.4217 | 1.8063  | 112.1935  | 1.3801   |
| 51 | A | 1120.9700 | 5.8825  | 114.6631  | 1.2006   |
| 52 | A | 1129.4565 | 4.6822  | 133.8826  | 0.6123   |
| 53 | A | 1239.1867 | 6.6549  | 61.5290   | 17.8855  |
| 54 | A | 1246.7934 | 6.7334  | 81.1847   | 9.2932   |
| 55 | A | 1364.7777 | 9.0867  | 68.6878   | 37.2860  |
| 56 | A | 1365.5224 | 8.8071  | 24.0782   | 14.6709  |
| 57 | A | 1419.7550 | 13.9387 | 120.5157  | 14.3585  |
| 58 | A | 1421.8598 | 13.5181 | 23.3859   | 3.0302   |
| 59 | A | 1475.6224 | 13.6614 | 297.8202  | 9.1245   |
| 60 | A | 1481.7988 | 13.0532 | 362.7582  | 13.1416  |
| 61 | A | 1534.3461 | 5.9631  | 192.2282  | 1.5663   |
| 62 | A | 1538.8755 | 7.0288  | 168.4253  | 0.5533   |
| 63 | A | 1619.8041 | 14.2672 | 28.2737   | 3.9371   |
| 64 | A | 1620.8152 | 11.2724 | 7.4218    | 4.8056   |
| 65 | A | 1635.0006 | 2.8439  | 15.8618   | 1.8545   |
| 66 | A | 1646.1069 | 4.0745  | 17.5087   | 7.5491   |
| 67 | A | 1668.7037 | 5.0592  | 1321.8966 | 56.5158  |
| 68 | A | 1678.4768 | 4.5929  | 40.7206   | 7.7576   |
| 69 | A | 3534.5870 | 7.7671  | 648.4857  | 522.0809 |
| 70 | A | 3613.4878 | 8.0384  | 126.5138  | 138.8076 |
| 71 | A | 3702.8312 | 8.8611  | 86.8067   | 38.4845  |
| 72 | A | 3736.5373 | 9.1001  | 83.1517   | 30.4501  |

02\_h2

| NM# | Symm | Wavenumber | Force Const | IR Intens | Raman Activ |
|-----|------|------------|-------------|-----------|-------------|
| 1   | A    | 3.6516     | 0.0001      | 0.1430    | 0.4387      |
| 2   | A    | 10.2192    | 0.0009      | 1.4667    | 0.2054      |
| 3   | A    | 16.3777    | 0.0021      | 0.3753    | 4.4941      |
| 4   | A    | 19.7084    | 0.0032      | 2.0034    | 0.2047      |
| 5   | A    | 33.7268    | 0.0093      | 0.1712    | 0.4845      |
| 6   | A    | 45.7455    | 0.0175      | 0.1268    | 0.2318      |
| 7   | A    | 94.9623    | 0.0451      | 30.9726   | 1.2295      |
| 8   | A    | 97.7444    | 0.1061      | 0.2887    | 0.1039      |
| 9   | A    | 110.2373   | 0.0209      | 89.2763   | 2.5051      |
| 10  | A    | 134.7466   | 0.1648      | 0.9689    | 0.2497      |

|    |   |           |         |          |         |
|----|---|-----------|---------|----------|---------|
| 11 | A | 153.7380  | 0.0257  | 85.3070  | 1.7049  |
| 12 | A | 206.2724  | 0.2659  | 0.0334   | 0.5967  |
| 13 | A | 207.5739  | 0.3503  | 4.7922   | 1.1862  |
| 14 | A | 223.0418  | 0.5069  | 0.9181   | 0.9518  |
| 15 | A | 226.9160  | 0.5248  | 2.0670   | 2.8112  |
| 16 | A | 286.7119  | 0.0658  | 143.2205 | 3.7041  |
| 17 | A | 288.9831  | 0.3402  | 11.9501  | 0.3313  |
| 18 | A | 290.0376  | 0.3525  | 7.7510   | 2.0071  |
| 19 | A | 313.5249  | 0.3140  | 3.5429   | 1.7507  |
| 20 | A | 314.8472  | 0.3294  | 1.5146   | 0.5948  |
| 21 | A | 316.3885  | 0.6504  | 0.4366   | 0.3251  |
| 22 | A | 321.8242  | 0.3047  | 16.3177  | 0.5533  |
| 23 | A | 334.1232  | 0.9759  | 0.7455   | 2.2605  |
| 24 | A | 336.6452  | 0.9860  | 2.9999   | 1.5477  |
| 25 | A | 395.2017  | 0.4378  | 3.2272   | 1.4899  |
| 26 | A | 397.3606  | 0.5187  | 3.3717   | 0.6063  |
| 27 | A | 406.9084  | 1.2210  | 3.1888   | 6.8853  |
| 28 | A | 407.3387  | 1.1922  | 1.8763   | 6.4446  |
| 29 | A | 475.7971  | 1.7975  | 0.5449   | 9.5705  |
| 30 | A | 477.1361  | 1.8159  | 3.0611   | 3.7558  |
| 31 | A | 497.1775  | 0.1721  | 1.2681   | 0.1550  |
| 32 | A | 516.8182  | 0.1785  | 1.1383   | 0.8489  |
| 33 | A | 609.2773  | 2.0872  | 3.0747   | 11.3179 |
| 34 | A | 611.3798  | 2.0838  | 12.0266  | 52.5503 |
| 35 | A | 632.2158  | 3.6137  | 10.2599  | 5.6391  |
| 36 | A | 632.5546  | 3.6267  | 1.2802   | 3.7121  |
| 37 | A | 652.0758  | 2.8038  | 5.8005   | 1.1435  |
| 38 | A | 656.2629  | 2.7636  | 7.4800   | 1.5798  |
| 39 | A | 675.9337  | 3.2423  | 0.9777   | 0.0818  |
| 40 | A | 681.0046  | 3.2501  | 0.9152   | 0.2923  |
| 41 | A | 697.6256  | 1.6466  | 1.8938   | 0.1706  |
| 42 | A | 699.5686  | 1.6887  | 1.2531   | 0.2666  |
| 43 | A | 744.4967  | 3.8336  | 7.0920   | 1.3796  |
| 44 | A | 753.3099  | 3.8638  | 11.6214  | 2.5374  |
| 45 | A | 841.5172  | 2.6312  | 124.1890 | 2.9038  |
| 46 | A | 844.3216  | 2.6549  | 101.3647 | 1.0945  |
| 47 | A | 1068.7259 | 5.3474  | 56.7990  | 0.7923  |
| 48 | A | 1075.9690 | 4.3685  | 43.4699  | 1.7592  |
| 49 | A | 1112.2560 | 1.7340  | 2.6258   | 0.5722  |
| 50 | A | 1114.3919 | 2.1214  | 202.3637 | 2.8401  |
| 51 | A | 1119.9593 | 4.1834  | 206.6658 | 0.5289  |
| 52 | A | 1124.9113 | 3.4144  | 104.7897 | 0.5504  |
| 53 | A | 1237.4922 | 6.6956  | 59.4212  | 5.2758  |
| 54 | A | 1243.5483 | 6.5251  | 46.0813  | 5.1216  |
| 55 | A | 1364.5716 | 8.8363  | 44.4941  | 29.2451 |
| 56 | A | 1367.4202 | 8.8694  | 36.2537  | 18.6770 |
| 57 | A | 1418.6166 | 12.7270 | 144.9300 | 5.8074  |
| 58 | A | 1423.7042 | 14.1524 | 64.7298  | 4.5307  |
| 59 | A | 1474.9410 | 13.2320 | 501.8402 | 8.9962  |
| 60 | A | 1476.0282 | 13.7686 | 307.2219 | 2.6454  |

|    |   |           |         |          |          |
|----|---|-----------|---------|----------|----------|
| 61 | A | 1532.9099 | 6.6522  | 380.1149 | 1.3189   |
| 62 | A | 1534.0998 | 6.1837  | 42.3406  | 0.6128   |
| 63 | A | 1622.3881 | 9.8858  | 35.3491  | 4.8434   |
| 64 | A | 1625.2753 | 10.5070 | 57.3219  | 4.1305   |
| 65 | A | 1633.7812 | 2.8942  | 28.9758  | 3.8313   |
| 66 | A | 1635.5574 | 3.3506  | 14.3320  | 1.5721   |
| 67 | A | 1668.6472 | 5.9770  | 338.3055 | 5.3775   |
| 68 | A | 1672.3151 | 5.8240  | 612.4241 | 36.5452  |
| 69 | A | 3606.3683 | 8.0110  | 259.0994 | 307.5734 |
| 70 | A | 3612.2316 | 8.0339  | 106.5594 | 113.4693 |
| 71 | A | 3723.7848 | 9.0321  | 172.1382 | 93.0388  |
| 72 | A | 3733.8786 | 9.0843  | 79.3487  | 26.3159  |

02\_p1

| NM# | Symm | Wavenumber | Force Const | IR Intens | Raman Activ |
|-----|------|------------|-------------|-----------|-------------|
| 1   | A    | 11.5045    | 0.0012      | 0.0558    | 2.6866      |
| 2   | A    | 13.2492    | 0.0015      | 1.4494    | 0.2294      |
| 3   | A    | 26.7909    | 0.0055      | 0.0154    | 4.2808      |
| 4   | A    | 60.7702    | 0.0210      | 9.7043    | 0.0742      |
| 5   | A    | 60.9541    | 0.0373      | 0.0001    | 0.1418      |
| 6   | A    | 72.6518    | 0.0484      | 0.0164    | 0.2994      |
| 7   | A    | 104.2996   | 0.0828      | 0.0041    | 0.1788      |
| 8   | A    | 110.2770   | 0.1280      | 0.6464    | 0.1175      |
| 9   | A    | 139.5194   | 0.1053      | 3.6367    | 0.1287      |
| 10  | A    | 149.6077   | 0.1055      | 0.0216    | 0.2197      |
| 11  | A    | 208.5879   | 0.2150      | 2.1484    | 0.0024      |
| 12  | A    | 221.0958   | 0.2827      | 0.1517    | 1.4774      |
| 13  | A    | 222.1249   | 0.5033      | 0.2825    | 0.0463      |
| 14  | A    | 222.6243   | 0.4993      | 0.5636    | 1.5683      |
| 15  | A    | 289.6243   | 0.4805      | 0.8396    | 0.1986      |
| 16  | A    | 289.8533   | 0.4941      | 2.6870    | 0.0949      |
| 17  | A    | 313.7207   | 0.3038      | 0.0560    | 0.0047      |
| 18  | A    | 313.7507   | 0.3055      | 3.4501    | 0.9140      |
| 19  | A    | 319.1554   | 0.6115      | 1.2135    | 0.0119      |
| 20  | A    | 326.8704   | 0.6189      | 0.4703    | 0.9289      |
| 21  | A    | 335.3478   | 0.9333      | 1.9366    | 0.6946      |
| 22  | A    | 335.6044   | 0.9553      | 0.5585    | 2.3778      |
| 23  | A    | 388.2356   | 0.2861      | 9.4258    | 1.7409      |
| 24  | A    | 396.1103   | 0.2454      | 2.9899    | 0.3294      |
| 25  | A    | 406.3258   | 1.0245      | 19.4109   | 5.4136      |
| 26  | A    | 408.5243   | 0.7935      | 0.1308    | 2.0502      |
| 27  | A    | 435.5054   | 0.1637      | 572.4991  | 2.0702      |
| 28  | A    | 454.8686   | 0.2094      | 23.6099   | 0.6122      |
| 29  | A    | 473.5641   | 0.1921      | 21.1601   | 0.3217      |
| 30  | A    | 473.8307   | 0.1921      | 23.0656   | 0.0995      |
| 31  | A    | 479.0649   | 0.6947      | 75.7524   | 0.0373      |
| 32  | A    | 480.3513   | 0.6710      | 7.0268    | 7.9882      |

|    |   |           |         |          |          |
|----|---|-----------|---------|----------|----------|
| 33 | A | 610.5659  | 1.9079  | 3.1017   | 40.4409  |
| 34 | A | 610.6831  | 1.9202  | 13.5732  | 0.0192   |
| 35 | A | 634.9987  | 3.4936  | 2.0973   | 3.9200   |
| 36 | A | 635.1351  | 3.5701  | 10.4036  | 0.8005   |
| 37 | A | 644.2670  | 2.8560  | 0.0615   | 1.2332   |
| 38 | A | 646.6673  | 3.0382  | 7.5445   | 0.0540   |
| 39 | A | 676.4303  | 3.2843  | 0.3330   | 0.1906   |
| 40 | A | 677.9467  | 3.2260  | 1.8235   | 0.0453   |
| 41 | A | 702.2624  | 1.8280  | 0.3529   | 0.1044   |
| 42 | A | 702.4360  | 1.8424  | 0.5625   | 0.3179   |
| 43 | A | 735.6144  | 3.8139  | 28.6583  | 0.0826   |
| 44 | A | 737.5588  | 3.8947  | 0.0127   | 0.6210   |
| 45 | A | 849.1348  | 2.8447  | 16.5206  | 0.2536   |
| 46 | A | 853.0698  | 2.8243  | 151.7641 | 2.0168   |
| 47 | A | 1077.0385 | 6.2691  | 25.5919  | 0.3972   |
| 48 | A | 1084.4996 | 6.9431  | 52.2431  | 1.2562   |
| 49 | A | 1108.6679 | 6.9040  | 0.0046   | 0.6459   |
| 50 | A | 1116.8734 | 6.1283  | 162.7807 | 0.6483   |
| 51 | A | 1136.5185 | 1.4928  | 30.7270  | 0.0236   |
| 52 | A | 1140.4188 | 1.5047  | 105.8004 | 1.8037   |
| 53 | A | 1241.1003 | 6.1044  | 41.1756  | 0.1710   |
| 54 | A | 1252.3372 | 5.9208  | 35.2100  | 6.3431   |
| 55 | A | 1367.1504 | 7.9153  | 32.8769  | 11.3749  |
| 56 | A | 1367.7258 | 7.7811  | 11.5980  | 11.5113  |
| 57 | A | 1424.0177 | 14.0893 | 94.0965  | 0.0140   |
| 58 | A | 1425.4963 | 14.1714 | 13.6464  | 9.5614   |
| 59 | A | 1470.8931 | 12.9190 | 11.5920  | 0.3004   |
| 60 | A | 1476.2305 | 13.1508 | 569.1374 | 3.0930   |
| 61 | A | 1525.2171 | 7.6670  | 42.0442  | 1.2896   |
| 62 | A | 1532.1967 | 7.2751  | 286.1180 | 0.8258   |
| 63 | A | 1622.8818 | 12.9608 | 21.6027  | 2.6509   |
| 64 | A | 1623.6851 | 8.7488  | 13.7656  | 4.4172   |
| 65 | A | 1636.3296 | 3.2530  | 3.3128   | 0.4616   |
| 66 | A | 1638.6707 | 3.4496  | 12.6864  | 2.7501   |
| 67 | A | 1667.7827 | 4.0967  | 29.4185  | 13.1967  |
| 68 | A | 1677.1633 | 5.0180  | 631.8487 | 7.6597   |
| 69 | A | 3585.4324 | 7.9237  | 152.8526 | 7.7919   |
| 70 | A | 3585.5791 | 7.9237  | 9.9600   | 148.8493 |
| 71 | A | 3697.0376 | 8.8848  | 2.7161   | 26.0518  |
| 72 | A | 3697.2111 | 8.8857  | 115.5002 | 11.1609  |

02\_p2

| NM# | Symm | Wavenumber | Force Const | IR Intens | Raman Activ |
|-----|------|------------|-------------|-----------|-------------|
| 1   | A    | 5.9774     | 0.0003      | 0.5087    | 3.2734      |
| 2   | A    | 18.3892    | 0.0029      | 0.6668    | 0.1030      |
| 3   | A    | 44.6894    | 0.0154      | 0.0009    | 3.4517      |
| 4   | A    | 53.7282    | 0.0187      | 5.1255    | 0.1676      |

|    |   |           |        |          |         |
|----|---|-----------|--------|----------|---------|
| 5  | A | 54.5707   | 0.0289 | 0.0127   | 0.0587  |
| 6  | A | 80.7084   | 0.0482 | 0.1610   | 0.5639  |
| 7  | A | 100.9584  | 0.1016 | 0.7488   | 0.0062  |
| 8  | A | 111.1602  | 0.1357 | 0.0079   | 0.2038  |
| 9  | A | 146.6188  | 0.1006 | 0.0444   | 0.4572  |
| 10 | A | 146.9969  | 0.1196 | 4.8827   | 0.0820  |
| 11 | A | 210.7804  | 0.2350 | 0.7388   | 0.4286  |
| 12 | A | 219.1602  | 0.2802 | 1.3290   | 0.3314  |
| 13 | A | 221.7067  | 0.4938 | 0.8584   | 1.3159  |
| 14 | A | 223.7057  | 0.4306 | 0.0231   | 0.4079  |
| 15 | A | 289.9174  | 0.4580 | 1.3884   | 0.0119  |
| 16 | A | 290.0573  | 0.4727 | 2.5373   | 0.3197  |
| 17 | A | 312.3642  | 0.3283 | 2.7925   | 0.2030  |
| 18 | A | 313.5627  | 0.3183 | 1.5914   | 0.7136  |
| 19 | A | 320.4049  | 0.5785 | 2.4329   | 0.5431  |
| 20 | A | 328.3493  | 0.6693 | 0.3619   | 1.0953  |
| 21 | A | 335.4209  | 0.9056 | 0.9413   | 0.0912  |
| 22 | A | 335.9331  | 0.8866 | 2.0081   | 2.9056  |
| 23 | A | 383.6768  | 0.1741 | 167.5140 | 0.2948  |
| 24 | A | 389.3307  | 0.1833 | 39.9226  | 1.5610  |
| 25 | A | 406.9369  | 0.7886 | 17.8333  | 0.4794  |
| 26 | A | 407.1989  | 0.8178 | 0.1020   | 6.7227  |
| 27 | A | 418.9195  | 0.2031 | 406.3010 | 1.1165  |
| 28 | A | 419.4949  | 0.1905 | 52.1276  | 2.7932  |
| 29 | A | 473.8661  | 0.1791 | 35.9806  | 0.5152  |
| 30 | A | 476.2262  | 0.3780 | 6.4437   | 1.0233  |
| 31 | A | 477.5565  | 1.0857 | 5.0957   | 4.7643  |
| 32 | A | 479.4273  | 0.2830 | 1.2367   | 1.6371  |
| 33 | A | 610.1718  | 1.9646 | 12.5313  | 0.4661  |
| 34 | A | 610.3461  | 1.9292 | 0.4005   | 40.0558 |
| 35 | A | 633.1342  | 3.6096 | 10.0675  | 2.1345  |
| 36 | A | 633.4664  | 3.4942 | 2.6866   | 2.2908  |
| 37 | A | 645.9266  | 2.9258 | 5.1272   | 0.6547  |
| 38 | A | 648.3475  | 2.8723 | 0.4202   | 0.4727  |
| 39 | A | 678.2831  | 3.3033 | 1.0264   | 0.0502  |
| 40 | A | 682.3832  | 3.2609 | 0.3160   | 0.2806  |
| 41 | A | 701.5971  | 1.8204 | 0.9319   | 0.0391  |
| 42 | A | 702.1077  | 1.8272 | 0.0396   | 0.4072  |
| 43 | A | 736.3530  | 3.8100 | 27.8730  | 0.0844  |
| 44 | A | 741.0198  | 3.8893 | 0.0001   | 0.8040  |
| 45 | A | 848.7285  | 2.8428 | 43.2692  | 0.4372  |
| 46 | A | 850.5632  | 2.8082 | 113.0133 | 1.8713  |
| 47 | A | 1072.3546 | 5.8427 | 82.2363  | 0.2688  |
| 48 | A | 1075.6023 | 6.9459 | 12.9797  | 1.2550  |
| 49 | A | 1116.9413 | 5.6501 | 84.2861  | 0.0436  |
| 50 | A | 1118.2348 | 3.7256 | 34.0962  | 1.5549  |
| 51 | A | 1134.7712 | 1.5759 | 16.5524  | 0.4442  |
| 52 | A | 1139.3535 | 1.7782 | 162.5070 | 1.1190  |
| 53 | A | 1246.7218 | 6.0250 | 1.2681   | 3.6694  |
| 54 | A | 1251.3322 | 6.0165 | 76.6800  | 3.6976  |

|    |   |           |         |          |          |
|----|---|-----------|---------|----------|----------|
| 55 | A | 1366.4866 | 8.0041  | 6.1859   | 5.7005   |
| 56 | A | 1368.5435 | 8.1058  | 36.0403  | 15.8109  |
| 57 | A | 1422.5587 | 13.8072 | 106.4233 | 2.2873   |
| 58 | A | 1426.8653 | 13.4607 | 5.2450   | 6.5142   |
| 59 | A | 1472.0945 | 13.0806 | 189.7359 | 2.8808   |
| 60 | A | 1478.2675 | 13.1261 | 380.4801 | 1.7439   |
| 61 | A | 1528.2073 | 7.7930  | 29.3461  | 1.6157   |
| 62 | A | 1532.8323 | 7.3935  | 272.4793 | 0.1309   |
| 63 | A | 1624.3133 | 14.5059 | 0.4805   | 0.5140   |
| 64 | A | 1628.1722 | 13.1234 | 24.7472  | 3.2412   |
| 65 | A | 1634.2524 | 3.2763  | 0.3670   | 0.9142   |
| 66 | A | 1636.1783 | 2.9993  | 26.6303  | 2.8395   |
| 67 | A | 1670.5928 | 4.8018  | 327.7037 | 5.7812   |
| 68 | A | 1671.1856 | 4.1918  | 422.2272 | 13.4422  |
| 69 | A | 3590.3043 | 7.9429  | 114.0539 | 8.5298   |
| 70 | A | 3590.5530 | 7.9435  | 39.9516  | 143.2643 |
| 71 | A | 3702.6042 | 8.9155  | 50.8269  | 5.6351   |
| 72 | A | 3702.9873 | 8.9172  | 61.2121  | 28.5403  |

02\_p3

| NM# | Symm | Wavenumber | Force Const | IR Intens | Raman Activ |
|-----|------|------------|-------------|-----------|-------------|
| 1   | A    | 10.7445    | 0.0011      | 0.1409    | 1.0409      |
| 2   | A    | 24.9881    | 0.0047      | 1.0241    | 2.6131      |
| 3   | A    | 41.2527    | 0.0141      | 0.4304    | 2.4806      |
| 4   | A    | 47.8755    | 0.0149      | 0.0492    | 0.6692      |
| 5   | A    | 55.1925    | 0.0326      | 0.0376    | 0.0517      |
| 6   | A    | 81.0826    | 0.0512      | 0.8016    | 1.1480      |
| 7   | A    | 103.8028   | 0.1053      | 0.1223    | 0.0760      |
| 8   | A    | 110.3804   | 0.1287      | 0.3916    | 0.1468      |
| 9   | A    | 146.8439   | 0.1240      | 1.5649    | 0.1331      |
| 10  | A    | 151.6333   | 0.1083      | 3.5974    | 0.3402      |
| 11  | A    | 212.4058   | 0.2258      | 1.4943    | 0.5202      |
| 12  | A    | 218.9328   | 0.2760      | 1.1265    | 0.6658      |
| 13  | A    | 221.5282   | 0.5015      | 0.4311    | 1.1197      |
| 14  | A    | 222.4138   | 0.5068      | 0.5100    | 0.3730      |
| 15  | A    | 290.1894   | 0.4717      | 3.0006    | 0.1688      |
| 16  | A    | 290.8807   | 0.5021      | 0.7249    | 0.1490      |
| 17  | A    | 312.7957   | 0.3030      | 2.4311    | 0.3066      |
| 18  | A    | 315.0226   | 0.3057      | 0.8437    | 0.8299      |
| 19  | A    | 320.9826   | 0.6148      | 2.5569    | 1.0028      |
| 20  | A    | 325.0283   | 0.6064      | 0.8983    | 0.1737      |
| 21  | A    | 335.6174   | 0.9046      | 0.9216    | 0.9515      |
| 22  | A    | 335.9527   | 0.8967      | 1.3347    | 2.1584      |
| 23  | A    | 386.6218   | 0.1985      | 33.8549   | 0.8630      |
| 24  | A    | 400.1697   | 0.2928      | 15.1548   | 1.8236      |
| 25  | A    | 406.5171   | 1.1722      | 1.9573    | 5.2405      |
| 26  | A    | 407.4796   | 0.9847      | 1.8478    | 2.9457      |

|    |   |           |         |          |          |
|----|---|-----------|---------|----------|----------|
| 27 | A | 442.8610  | 0.2260  | 249.0122 | 1.2223   |
| 28 | A | 460.5214  | 0.1742  | 42.0045  | 0.2974   |
| 29 | A | 470.8113  | 0.2587  | 8.4312   | 2.0714   |
| 30 | A | 475.9798  | 1.0531  | 4.0829   | 4.2041   |
| 31 | A | 481.8736  | 0.3997  | 65.7139  | 2.1310   |
| 32 | A | 513.9357  | 0.2004  | 181.7985 | 2.7322   |
| 33 | A | 610.0469  | 1.7829  | 4.0859   | 7.6148   |
| 34 | A | 610.9794  | 1.8303  | 9.7209   | 34.1426  |
| 35 | A | 632.2526  | 3.4841  | 7.1005   | 1.6913   |
| 36 | A | 632.7906  | 3.3961  | 8.2870   | 1.9705   |
| 37 | A | 645.8752  | 2.9245  | 4.2296   | 1.2699   |
| 38 | A | 647.7877  | 3.0366  | 0.4306   | 0.1124   |
| 39 | A | 679.9451  | 3.2999  | 0.8888   | 0.2410   |
| 40 | A | 684.0333  | 3.3379  | 1.4034   | 0.1135   |
| 41 | A | 702.5351  | 1.8804  | 1.1762   | 0.1156   |
| 42 | A | 702.8669  | 1.8803  | 0.3658   | 0.2085   |
| 43 | A | 738.5610  | 3.8652  | 31.9103  | 0.2377   |
| 44 | A | 740.7865  | 3.9271  | 0.1565   | 0.2372   |
| 45 | A | 848.0631  | 2.9248  | 6.3992   | 2.2178   |
| 46 | A | 852.6413  | 2.8930  | 166.4709 | 0.1281   |
| 47 | A | 1078.2262 | 6.3266  | 39.3617  | 0.6444   |
| 48 | A | 1078.5830 | 6.3244  | 41.9311  | 0.8900   |
| 49 | A | 1113.5677 | 5.2548  | 23.6944  | 0.8627   |
| 50 | A | 1115.8949 | 5.6357  | 152.0938 | 0.5726   |
| 51 | A | 1142.9244 | 1.5617  | 21.3137  | 1.2654   |
| 52 | A | 1146.3041 | 1.6116  | 118.5702 | 0.5117   |
| 53 | A | 1242.9528 | 5.5419  | 28.3195  | 0.1812   |
| 54 | A | 1247.0326 | 5.7924  | 57.9748  | 6.5096   |
| 55 | A | 1363.9229 | 7.9033  | 9.5568   | 15.9204  |
| 56 | A | 1365.5147 | 7.7627  | 9.2166   | 6.6713   |
| 57 | A | 1426.9513 | 13.9994 | 11.4720  | 1.0997   |
| 58 | A | 1434.3168 | 13.9044 | 104.7091 | 7.8667   |
| 59 | A | 1470.5445 | 12.6605 | 9.0883   | 3.3396   |
| 60 | A | 1477.5696 | 12.2200 | 549.7685 | 0.4550   |
| 61 | A | 1521.0505 | 8.9792  | 285.7275 | 1.2398   |
| 62 | A | 1526.3446 | 8.1092  | 113.9155 | 1.5271   |
| 63 | A | 1628.8943 | 9.7312  | 10.1845  | 2.2268   |
| 64 | A | 1630.8472 | 3.4580  | 61.5058  | 4.3323   |
| 65 | A | 1633.9281 | 7.4633  | 13.9420  | 2.0433   |
| 66 | A | 1635.4056 | 3.4602  | 10.6926  | 1.8252   |
| 67 | A | 1664.5813 | 4.1635  | 5.7221   | 3.3782   |
| 68 | A | 1674.2591 | 4.8292  | 641.9369 | 16.9558  |
| 69 | A | 3577.0167 | 7.8871  | 73.5373  | 130.7751 |
| 70 | A | 3584.5296 | 7.9191  | 57.0227  | 66.7973  |
| 71 | A | 3686.5277 | 8.8272  | 52.5005  | 28.6575  |
| 72 | A | 3696.0848 | 8.8753  | 51.6346  | 16.6779  |

02\_p4



| NM# | Symm | Wavenumber | Force Const | IR Intens | Raman Activ |
|-----|------|------------|-------------|-----------|-------------|
| 1   | A    | 7.7014     | 0.0005      | 0.8356    | 0.2464      |
| 2   | A    | 19.7622    | 0.0030      | 0.6311    | 3.1017      |
| 3   | A    | 37.6615    | 0.0111      | 0.0407    | 3.5722      |
| 4   | A    | 53.4134    | 0.0168      | 5.8769    | 0.0855      |
| 5   | A    | 58.8443    | 0.0339      | 0.2906    | 0.1338      |
| 6   | A    | 78.4885    | 0.0466      | 0.2192    | 0.6757      |
| 7   | A    | 101.0143   | 0.0967      | 0.6017    | 0.0137      |
| 8   | A    | 112.2314   | 0.1431      | 0.0102    | 0.1737      |
| 9   | A    | 143.5759   | 0.1108      | 1.1959    | 0.2449      |
| 10  | A    | 147.6774   | 0.1175      | 2.5608    | 0.1484      |
| 11  | A    | 210.7713   | 0.2386      | 1.0298    | 0.4183      |
| 12  | A    | 218.2325   | 0.2592      | 1.0006    | 0.7213      |
| 13  | A    | 222.0270   | 0.4631      | 0.7888    | 1.3499      |
| 14  | A    | 222.3075   | 0.4825      | 0.1129    | 0.3019      |
| 15  | A    | 289.6118   | 0.4519      | 0.9864    | 0.0168      |
| 16  | A    | 289.7720   | 0.4657      | 2.9900    | 0.3164      |
| 17  | A    | 313.0542   | 0.3251      | 1.5380    | 0.4478      |
| 18  | A    | 313.3785   | 0.3169      | 2.2184    | 0.5207      |
| 19  | A    | 321.5196   | 0.6196      | 3.6499    | 0.6700      |
| 20  | A    | 326.0508   | 0.5995      | 0.2099    | 0.5840      |
| 21  | A    | 335.3745   | 0.9379      | 0.7043    | 0.0539      |
| 22  | A    | 335.5346   | 0.9070      | 2.0660    | 2.9564      |
| 23  | A    | 380.0136   | 0.1479      | 279.7722  | 0.4430      |
| 24  | A    | 389.9534   | 0.1656      | 71.0824   | 1.1619      |
| 25  | A    | 405.4832   | 0.4234      | 1.8218    | 3.3734      |
| 26  | A    | 407.4217   | 0.4932      | 48.6459   | 0.6098      |
| 27  | A    | 411.5400   | 0.3040      | 189.6119  | 2.1113      |
| 28  | A    | 412.7083   | 0.2467      | 82.7305   | 4.7955      |
| 29  | A    | 475.1338   | 0.1936      | 13.2289   | 0.5184      |
| 30  | A    | 476.9468   | 1.1013      | 7.0062    | 5.2325      |
| 31  | A    | 477.4401   | 0.9963      | 4.1877    | 1.8027      |
| 32  | A    | 482.3774   | 0.1823      | 4.6574    | 0.3381      |
| 33  | A    | 609.8442   | 1.9600      | 4.7269    | 24.3323     |
| 34  | A    | 610.5517   | 1.9836      | 8.1420    | 16.3146     |
| 35  | A    | 633.0885   | 3.5590      | 4.0888    | 2.2908      |
| 36  | A    | 634.4773   | 3.5692      | 8.0180    | 2.5195      |
| 37  | A    | 645.8397   | 2.8325      | 0.4103    | 0.4053      |
| 38  | A    | 646.6508   | 2.9524      | 6.3733    | 0.6367      |
| 39  | A    | 677.5492   | 3.2860      | 1.0524    | 0.1585      |
| 40  | A    | 680.4191   | 3.2629      | 0.2176    | 0.2064      |
| 41  | A    | 701.0086   | 1.7998      | 0.8997    | 0.0854      |
| 42  | A    | 701.8726   | 1.8138      | 0.2635    | 0.3170      |
| 43  | A    | 734.8126   | 3.8036      | 17.3673   | 0.2354      |
| 44  | A    | 741.4928   | 3.8910      | 11.6883   | 1.1185      |
| 45  | A    | 848.6502   | 2.8275      | 32.0337   | 0.3801      |
| 46  | A    | 850.7728   | 2.7881      | 128.1822  | 2.0046      |
| 47  | A    | 1073.2116  | 6.0274      | 73.5352   | 0.2380      |
| 48  | A    | 1075.3372  | 6.8692      | 16.9627   | 1.2713      |

|    |   |           |         |          |          |
|----|---|-----------|---------|----------|----------|
| 49 | A | 1117.5552 | 3.7850  | 26.6851  | 1.5136   |
| 50 | A | 1117.8135 | 5.7039  | 99.1170  | 0.0483   |
| 51 | A | 1133.3670 | 1.5763  | 14.9596  | 0.4729   |
| 52 | A | 1137.3286 | 1.7338  | 162.6535 | 1.1901   |
| 53 | A | 1246.1998 | 6.1110  | 0.1640   | 3.5830   |
| 54 | A | 1251.4934 | 6.1542  | 80.8396  | 3.7153   |
| 55 | A | 1366.7726 | 8.0938  | 3.7870   | 9.7456   |
| 56 | A | 1368.8329 | 8.1806  | 41.7031  | 12.4780  |
| 57 | A | 1421.7488 | 13.8185 | 110.2775 | 2.4426   |
| 58 | A | 1425.4406 | 13.3571 | 3.3403   | 6.4674   |
| 59 | A | 1471.7380 | 13.2445 | 135.6619 | 3.5631   |
| 60 | A | 1478.9164 | 13.0936 | 432.3316 | 1.3436   |
| 61 | A | 1528.7165 | 7.4959  | 47.8614  | 1.4443   |
| 62 | A | 1532.2572 | 7.1810  | 240.8230 | 0.1645   |
| 63 | A | 1624.4312 | 13.3750 | 1.4286   | 0.6192   |
| 64 | A | 1627.2008 | 12.5154 | 24.8172  | 3.6117   |
| 65 | A | 1633.4962 | 3.0856  | 2.8918   | 0.5686   |
| 66 | A | 1635.8485 | 3.1072  | 24.1057  | 3.3524   |
| 67 | A | 1669.5337 | 4.8243  | 297.1616 | 9.9316   |
| 68 | A | 1672.0244 | 4.6436  | 469.1145 | 10.8308  |
| 69 | A | 3591.3958 | 7.9471  | 120.5407 | 21.3402  |
| 70 | A | 3591.6398 | 7.9478  | 38.1401  | 138.4927 |
| 71 | A | 3704.8047 | 8.9272  | 48.8925  | 15.0131  |
| 72 | A | 3705.2865 | 8.9300  | 68.0535  | 21.5523  |

02\_p5

| NM# | Symm | Wavenumber | Force Const | IR Intens | Raman Activ |
|-----|------|------------|-------------|-----------|-------------|
| 1   | A    | 6.0121     | 0.0003      | 0.5087    | 3.2730      |
| 2   | A    | 18.3932    | 0.0029      | 0.6666    | 0.1030      |
| 3   | A    | 44.6893    | 0.0154      | 0.0009    | 3.4518      |
| 4   | A    | 53.7301    | 0.0187      | 5.1214    | 0.1675      |
| 5   | A    | 54.5759    | 0.0289      | 0.0170    | 0.0588      |
| 6   | A    | 80.7098    | 0.0482      | 0.1611    | 0.5639      |
| 7   | A    | 100.9594   | 0.1016      | 0.7489    | 0.0062      |
| 8   | A    | 111.1614   | 0.1357      | 0.0079    | 0.2038      |
| 9   | A    | 146.6191   | 0.1006      | 0.0445    | 0.4572      |
| 10  | A    | 146.9966   | 0.1196      | 4.8831    | 0.0820      |
| 11  | A    | 210.7810   | 0.2350      | 0.7390    | 0.4285      |
| 12  | A    | 219.1610   | 0.2802      | 1.3293    | 0.3314      |
| 13  | A    | 221.7065   | 0.4938      | 0.8585    | 1.3159      |
| 14  | A    | 223.7074   | 0.4306      | 0.0232    | 0.4080      |
| 15  | A    | 289.9173   | 0.4580      | 1.3887    | 0.0119      |
| 16  | A    | 290.0573   | 0.4727      | 2.5371    | 0.3197      |
| 17  | A    | 312.3644   | 0.3283      | 2.7925    | 0.2030      |
| 18  | A    | 313.5628   | 0.3183      | 1.5911    | 0.7136      |
| 19  | A    | 320.4068   | 0.5786      | 2.4331    | 0.5431      |
| 20  | A    | 328.3515   | 0.6693      | 0.3623    | 1.0953      |

|    |   |           |         |          |          |
|----|---|-----------|---------|----------|----------|
| 21 | A | 335.4211  | 0.9056  | 0.9414   | 0.0912   |
| 22 | A | 335.9331  | 0.8867  | 2.0078   | 2.9056   |
| 23 | A | 383.6733  | 0.1741  | 167.5568 | 0.2949   |
| 24 | A | 389.3289  | 0.1833  | 39.9348  | 1.5610   |
| 25 | A | 406.9383  | 0.7888  | 17.8008  | 0.4809   |
| 26 | A | 407.1996  | 0.8179  | 0.1069   | 6.7219   |
| 27 | A | 418.9203  | 0.2031  | 405.7615 | 1.1190   |
| 28 | A | 419.4954  | 0.1906  | 52.6239  | 2.7897   |
| 29 | A | 473.8714  | 0.1791  | 36.0067  | 0.5159   |
| 30 | A | 476.2277  | 0.3786  | 6.4473   | 1.0255   |
| 31 | A | 477.5568  | 1.0852  | 5.0884   | 4.7636   |
| 32 | A | 479.4322  | 0.2826  | 1.2327   | 1.6348   |
| 33 | A | 610.1716  | 1.9646  | 12.5313  | 0.4663   |
| 34 | A | 610.3460  | 1.9291  | 0.4005   | 40.0554  |
| 35 | A | 633.1340  | 3.6096  | 10.0674  | 2.1345   |
| 36 | A | 633.4664  | 3.4942  | 2.6868   | 2.2909   |
| 37 | A | 645.9262  | 2.9258  | 5.1267   | 0.6548   |
| 38 | A | 648.3485  | 2.8724  | 0.4203   | 0.4726   |
| 39 | A | 678.2827  | 3.3033  | 1.0262   | 0.0502   |
| 40 | A | 682.3841  | 3.2609  | 0.3160   | 0.2806   |
| 41 | A | 701.5975  | 1.8204  | 0.9318   | 0.0391   |
| 42 | A | 702.1078  | 1.8272  | 0.0396   | 0.4072   |
| 43 | A | 736.3533  | 3.8100  | 27.8730  | 0.0844   |
| 44 | A | 741.0197  | 3.8893  | 0.0006   | 0.8039   |
| 45 | A | 848.7292  | 2.8428  | 43.2695  | 0.4371   |
| 46 | A | 850.5629  | 2.8082  | 113.0128 | 1.8714   |
| 47 | A | 1072.3544 | 5.8427  | 82.2353  | 0.2688   |
| 48 | A | 1075.6023 | 6.9460  | 12.9786  | 1.2550   |
| 49 | A | 1116.9413 | 5.6502  | 84.2867  | 0.0436   |
| 50 | A | 1118.2351 | 3.7259  | 34.1026  | 1.5549   |
| 51 | A | 1134.7714 | 1.5759  | 16.5527  | 0.4442   |
| 52 | A | 1139.3541 | 1.7781  | 162.5028 | 1.1191   |
| 53 | A | 1246.7219 | 6.0250  | 1.2681   | 3.6696   |
| 54 | A | 1251.3330 | 6.0165  | 76.6796  | 3.6976   |
| 55 | A | 1366.4867 | 8.0041  | 6.1867   | 5.7006   |
| 56 | A | 1368.5436 | 8.1057  | 36.0404  | 15.8110  |
| 57 | A | 1422.5582 | 13.8072 | 106.4203 | 2.2873   |
| 58 | A | 1426.8650 | 13.4607 | 5.2459   | 6.5143   |
| 59 | A | 1472.0945 | 13.0806 | 189.7348 | 2.8808   |
| 60 | A | 1478.2680 | 13.1261 | 380.4824 | 1.7438   |
| 61 | A | 1528.2075 | 7.7930  | 29.3453  | 1.6156   |
| 62 | A | 1532.8327 | 7.3935  | 272.4771 | 0.1309   |
| 63 | A | 1624.3128 | 14.5058 | 0.4802   | 0.5141   |
| 64 | A | 1628.1716 | 13.1228 | 24.7503  | 3.2414   |
| 65 | A | 1634.2529 | 3.2763  | 0.3672   | 0.9142   |
| 66 | A | 1636.1788 | 2.9994  | 26.6277  | 2.8394   |
| 67 | A | 1670.5931 | 4.8017  | 327.7104 | 5.7822   |
| 68 | A | 1671.1863 | 4.1919  | 422.2192 | 13.4411  |
| 69 | A | 3590.3030 | 7.9429  | 114.0461 | 8.5487   |
| 70 | A | 3590.5517 | 7.9435  | 39.9599  | 143.2460 |

|    |   |           |        |         |         |
|----|---|-----------|--------|---------|---------|
| 71 | A | 3702.6028 | 8.9155 | 50.8238 | 5.6356  |
| 72 | A | 3702.9859 | 8.9172 | 61.2143 | 28.5392 |

-----

02\_p6

| NM# | Symm | Wavenumber | Force Const | IR Intens | Raman Activ |
|-----|------|------------|-------------|-----------|-------------|
| 1   | A    | 17.5884    | 0.0027      | 1.2839    | 0.2894      |
| 2   | A    | 32.6045    | 0.0077      | 0.0243    | 3.4818      |
| 3   | A    | 40.5596    | 0.0136      | 0.0558    | 3.2474      |
| 4   | A    | 52.2753    | 0.0262      | 1.7319    | 0.0260      |
| 5   | A    | 60.6688    | 0.0191      | 8.8631    | 0.0367      |
| 6   | A    | 76.0339    | 0.0526      | 0.0009    | 0.7043      |
| 7   | A    | 105.5836   | 0.0888      | 0.3615    | 0.1922      |
| 8   | A    | 110.1517   | 0.1228      | 0.5436    | 0.1132      |
| 9   | A    | 143.0554   | 0.1003      | 1.2668    | 0.1738      |
| 10  | A    | 147.7348   | 0.1147      | 3.2082    | 0.1270      |
| 11  | A    | 211.6020   | 0.2306      | 3.0353    | 0.0632      |
| 12  | A    | 221.4443   | 0.2868      | 0.0254    | 1.6441      |
| 13  | A    | 222.2003   | 0.5025      | 0.3880    | 0.7032      |
| 14  | A    | 223.0882   | 0.4870      | 0.2788    | 0.9423      |
| 15  | A    | 289.6339   | 0.4697      | 0.5197    | 0.1642      |
| 16  | A    | 290.1954   | 0.4743      | 3.1099    | 0.1255      |
| 17  | A    | 313.6533   | 0.3095      | 2.4661    | 0.5858      |
| 18  | A    | 314.8028   | 0.3124      | 1.2534    | 0.3617      |
| 19  | A    | 324.4273   | 0.5700      | 0.7673    | 0.3965      |
| 20  | A    | 325.8537   | 0.6219      | 0.7647    | 0.2917      |
| 21  | A    | 335.6419   | 0.8993      | 1.2137    | 1.2572      |
| 22  | A    | 335.8296   | 0.9306      | 1.2801    | 1.8912      |
| 23  | A    | 389.8998   | 0.2219      | 7.1190    | 1.7302      |
| 24  | A    | 392.7669   | 0.2162      | 14.9971   | 0.5086      |
| 25  | A    | 407.1864   | 1.1691      | 1.3919    | 4.1498      |
| 26  | A    | 407.7579   | 1.0424      | 2.1064    | 4.2385      |
| 27  | A    | 456.7581   | 0.2259      | 266.9875  | 0.7068      |
| 28  | A    | 462.2665   | 0.2053      | 7.8705    | 0.6161      |
| 29  | A    | 468.3012   | 0.2184      | 151.1948  | 0.4652      |
| 30  | A    | 472.4647   | 0.6084      | 9.2682    | 2.0300      |
| 31  | A    | 481.3110   | 0.4849      | 162.2942  | 2.3106      |
| 32  | A    | 495.8773   | 0.2235      | 116.6165  | 4.8232      |
| 33  | A    | 610.5213   | 1.8981      | 10.6777   | 17.6676     |
| 34  | A    | 611.0041   | 1.8379      | 9.3129    | 24.2543     |
| 35  | A    | 635.5128   | 3.5690      | 7.2524    | 0.0531      |
| 36  | A    | 636.0519   | 3.4370      | 5.0629    | 4.3959      |
| 37  | A    | 646.8714   | 3.0349      | 0.4523    | 0.7951      |
| 38  | A    | 649.6794   | 3.0503      | 10.0118   | 0.1406      |
| 39  | A    | 679.2632   | 3.2884      | 0.5951    | 0.1922      |
| 40  | A    | 680.5979   | 3.3105      | 0.7211    | 0.2216      |
| 41  | A    | 702.8311   | 1.8615      | 0.2489    | 0.1579      |
| 42  | A    | 703.4809   | 1.8622      | 1.1896    | 0.1722      |

|    |   |           |         |          |         |
|----|---|-----------|---------|----------|---------|
| 43 | A | 739.2998  | 3.9166  | 1.3215   | 1.4278  |
| 44 | A | 741.4423  | 3.9119  | 33.2775  | 0.1494  |
| 45 | A | 849.8427  | 2.9044  | 0.6914   | 0.2816  |
| 46 | A | 854.3396  | 2.8685  | 174.5239 | 2.1898  |
| 47 | A | 1075.0089 | 6.7240  | 9.4173   | 0.8246  |
| 48 | A | 1083.0901 | 7.0251  | 75.8217  | 0.6034  |
| 49 | A | 1111.1596 | 6.2402  | 18.6376  | 0.7422  |
| 50 | A | 1120.5832 | 5.6943  | 130.6112 | 0.4626  |
| 51 | A | 1140.3031 | 1.5522  | 21.6018  | 0.2305  |
| 52 | A | 1145.2769 | 1.5208  | 115.7768 | 1.6671  |
| 53 | A | 1247.4417 | 5.8145  | 24.5512  | 5.6031  |
| 54 | A | 1249.9197 | 5.9217  | 57.8597  | 2.3844  |
| 55 | A | 1367.6198 | 7.6825  | 39.6797  | 1.2383  |
| 56 | A | 1369.2330 | 7.6266  | 2.2173   | 22.8923 |
| 57 | A | 1422.2039 | 13.8693 | 41.5688  | 5.4376  |
| 58 | A | 1424.3660 | 14.0571 | 72.0331  | 4.1484  |
| 59 | A | 1472.8816 | 13.1096 | 13.0783  | 2.5880  |
| 60 | A | 1479.6744 | 13.0628 | 605.2300 | 3.3055  |
| 61 | A | 1526.4934 | 7.7476  | 100.5247 | 1.3196  |
| 62 | A | 1530.7310 | 7.4899  | 202.0786 | 0.5751  |
| 63 | A | 1624.1610 | 12.4389 | 32.4667  | 3.8739  |
| 64 | A | 1624.9179 | 12.5027 | 10.9694  | 3.3357  |
| 65 | A | 1636.2539 | 3.0707  | 14.5634  | 1.6554  |
| 66 | A | 1638.5491 | 3.4983  | 14.0074  | 2.4691  |
| 67 | A | 1669.6820 | 3.9207  | 15.5845  | 22.0370 |
| 68 | A | 1676.8592 | 4.7296  | 653.6384 | 0.6352  |
| 69 | A | 3580.6855 | 7.9032  | 79.6928  | 79.3080 |
| 70 | A | 3584.3100 | 7.9189  | 75.4428  | 93.4323 |
| 71 | A | 3689.3687 | 8.8432  | 55.4671  | 18.8783 |
| 72 | A | 3694.9392 | 8.8724  | 61.2282  | 21.8780 |

-----

03\_hb

| NM# | Symm | Wavenumber | Force Const | IR Intens | Raman Activ |
|-----|------|------------|-------------|-----------|-------------|
| 1   | A    | 7.4984     | 0.0004      | 0.0225    | 0.1102      |
| 2   | A    | 11.0621    | 0.0014      | 0.1328    | 0.0042      |
| 3   | A    | 22.2452    | 0.0049      | 0.0513    | 0.0452      |
| 4   | A    | 30.3226    | 0.0081      | 0.1109    | 6.7612      |
| 5   | A    | 42.1074    | 0.0182      | 0.4475    | 0.3965      |
| 6   | A    | 55.1253    | 0.0287      | 0.9255    | 0.4921      |
| 7   | A    | 89.6153    | 0.0272      | 52.0389   | 0.0127      |
| 8   | A    | 94.2475    | 0.1116      | 0.0107    | 0.0115      |
| 9   | A    | 96.0995    | 0.1143      | 0.0301    | 0.1104      |
| 10  | A    | 103.4980   | 0.0869      | 0.1294    | 0.1854      |
| 11  | A    | 127.9344   | 0.0127      | 136.8692  | 0.1379      |
| 12  | A    | 203.6780   | 0.5558      | 0.7735    | 3.1482      |
| 13  | A    | 205.9100   | 0.5476      | 0.0610    | 1.0420      |
| 14  | A    | 208.0864   | 0.2563      | 0.5113    | 1.7548      |

|    |   |           |         |          |         |
|----|---|-----------|---------|----------|---------|
| 15 | A | 208.8682  | 0.2823  | 3.1849   | 0.0807  |
| 16 | A | 248.4600  | 0.6080  | 0.4742   | 0.6513  |
| 17 | A | 250.6209  | 0.5907  | 1.2846   | 1.4620  |
| 18 | A | 304.3106  | 0.6102  | 7.2774   | 0.0806  |
| 19 | A | 309.2982  | 0.5830  | 3.9608   | 0.4463  |
| 20 | A | 321.2853  | 1.3542  | 0.3228   | 2.9365  |
| 21 | A | 324.1013  | 1.2769  | 0.7942   | 4.9226  |
| 22 | A | 328.3952  | 0.3042  | 2.6607   | 0.0177  |
| 23 | A | 337.9043  | 0.3488  | 2.8754   | 0.0550  |
| 24 | A | 354.6684  | 0.2133  | 29.5688  | 0.0362  |
| 25 | A | 358.3679  | 0.3958  | 5.1735   | 0.0586  |
| 26 | A | 400.7820  | 0.1509  | 85.5126  | 0.0024  |
| 27 | A | 407.8669  | 1.4703  | 4.5697   | 8.4292  |
| 28 | A | 408.6289  | 1.4025  | 1.8598   | 2.7739  |
| 29 | A | 411.5312  | 1.0282  | 2.3333   | 4.3426  |
| 30 | A | 413.1726  | 0.9377  | 1.2141   | 3.7404  |
| 31 | A | 519.6488  | 0.1746  | 0.0048   | 0.0115  |
| 32 | A | 599.3068  | 2.0805  | 1.5817   | 8.2492  |
| 33 | A | 606.2030  | 2.0490  | 3.0310   | 60.7054 |
| 34 | A | 617.8199  | 2.9509  | 15.4142  | 23.4818 |
| 35 | A | 619.3931  | 0.2622  | 6.3217   | 0.0262  |
| 36 | A | 623.5837  | 3.4612  | 0.2604   | 5.3888  |
| 37 | A | 658.8698  | 2.7733  | 0.0470   | 0.0360  |
| 38 | A | 665.6054  | 1.4256  | 15.7352  | 0.5470  |
| 39 | A | 677.3474  | 1.3940  | 1.3887   | 0.8739  |
| 40 | A | 680.8824  | 3.2616  | 0.2186   | 0.1167  |
| 41 | A | 681.1862  | 1.3999  | 0.1737   | 0.1939  |
| 42 | A | 685.6128  | 3.0869  | 0.3968   | 0.5531  |
| 43 | A | 746.0820  | 3.0425  | 45.0594  | 0.3962  |
| 44 | A | 751.3564  | 3.1832  | 117.3126 | 0.1249  |
| 45 | A | 752.9136  | 3.7429  | 0.0086   | 0.0515  |
| 46 | A | 755.2300  | 3.9842  | 30.5319  | 0.4238  |
| 47 | A | 1065.4710 | 2.3963  | 2.3187   | 3.2602  |
| 48 | A | 1072.2127 | 2.8230  | 4.4400   | 0.2600  |
| 49 | A | 1088.6335 | 8.1258  | 293.3870 | 3.1157  |
| 50 | A | 1096.4455 | 7.0257  | 164.2578 | 5.6031  |
| 51 | A | 1107.8927 | 1.7676  | 109.3665 | 4.0201  |
| 52 | A | 1117.2948 | 1.7824  | 63.3069  | 0.1564  |
| 53 | A | 1138.5543 | 6.7646  | 0.2492   | 7.3754  |
| 54 | A | 1139.8107 | 6.6148  | 3.3414   | 9.9957  |
| 55 | A | 1352.2227 | 7.9735  | 53.5254  | 43.8073 |
| 56 | A | 1353.7382 | 7.7627  | 40.9585  | 26.3161 |
| 57 | A | 1417.0993 | 14.2758 | 143.7124 | 10.7160 |
| 58 | A | 1419.6460 | 13.9937 | 48.4897  | 12.4736 |
| 59 | A | 1455.7728 | 13.5694 | 275.0841 | 2.4158  |
| 60 | A | 1461.4185 | 12.9940 | 326.5917 | 4.6365  |
| 61 | A | 1506.9254 | 5.1748  | 24.1209  | 1.4520  |
| 62 | A | 1513.6329 | 6.0506  | 19.8469  | 3.8616  |
| 63 | A | 1597.7069 | 12.6481 | 45.0377  | 6.0840  |
| 64 | A | 1598.3694 | 14.7930 | 113.1348 | 3.2992  |

|    |   |           |        |           |          |
|----|---|-----------|--------|-----------|----------|
| 65 | A | 1624.2513 | 3.9702 | 90.5478   | 10.0158  |
| 66 | A | 1629.4224 | 6.5223 | 123.2748  | 10.9900  |
| 67 | A | 1656.6720 | 3.2830 | 1238.9708 | 42.9779  |
| 68 | A | 1670.9740 | 3.1756 | 121.9080  | 7.2259   |
| 69 | A | 3535.0437 | 7.7614 | 616.2475  | 527.9765 |
| 70 | A | 3606.7787 | 8.0087 | 105.4163  | 119.9354 |
| 71 | A | 3693.3437 | 8.8217 | 97.2167   | 28.2315  |
| 72 | A | 3728.8778 | 9.0602 | 80.1734   | 20.4215  |

03\_pi

| NM# | Symm | Wavenumber | Force Const | IR Intens | Raman Activ |
|-----|------|------------|-------------|-----------|-------------|
| 1   | A    | 16.1328    | 0.0026      | 1.1454    | 0.0000      |
| 2   | A    | 25.8398    | 0.0056      | 0.0000    | 3.9533      |
| 3   | A    | 38.2349    | 0.0131      | 0.0000    | 3.5679      |
| 4   | A    | 50.5552    | 0.0250      | 3.9281    | 0.0000      |
| 5   | A    | 68.4860    | 0.0289      | 7.1205    | 0.0000      |
| 6   | A    | 75.1837    | 0.0593      | 0.0000    | 0.6522      |
| 7   | A    | 97.2865    | 0.1136      | 0.0735    | 0.0000      |
| 8   | A    | 109.8005   | 0.1261      | 0.0000    | 0.2209      |
| 9   | A    | 115.4347   | 0.0743      | 3.0430    | 0.0000      |
| 10  | A    | 118.2804   | 0.0603      | 0.0000    | 0.4168      |
| 11  | A    | 204.6573   | 0.5633      | 0.1505    | 0.0000      |
| 12  | A    | 205.0043   | 0.5650      | 0.0000    | 2.3497      |
| 13  | A    | 212.5971   | 0.2142      | 3.0372    | 0.0000      |
| 14  | A    | 220.5130   | 0.2570      | 0.0000    | 1.9945      |
| 15  | A    | 248.6102   | 0.5959      | 1.0750    | 0.0000      |
| 16  | A    | 248.6625   | 0.5883      | 0.0000    | 1.1253      |
| 17  | A    | 311.1278   | 0.6580      | 0.7889    | 0.0000      |
| 18  | A    | 313.5650   | 0.5282      | 0.0000    | 0.5667      |
| 19  | A    | 322.2435   | 1.3483      | 1.3755    | 0.0000      |
| 20  | A    | 322.4445   | 1.3582      | 0.0000    | 6.7797      |
| 21  | A    | 328.9835   | 0.3044      | 0.0000    | 0.0374      |
| 22  | A    | 329.2049   | 0.3066      | 4.7677    | 0.0000      |
| 23  | A    | 362.7365   | 0.3452      | 0.0000    | 1.0785      |
| 24  | A    | 366.7200   | 0.3500      | 7.8415    | 0.0000      |
| 25  | A    | 405.0252   | 0.9781      | 0.0014    | 6.7409      |
| 26  | A    | 405.2330   | 0.8504      | 39.1715   | 0.0002      |
| 27  | A    | 411.2921   | 1.0285      | 3.1079    | 0.0000      |
| 28  | A    | 411.6669   | 1.0236      | 0.0000    | 6.1469      |
| 29  | A    | 439.2972   | 0.1553      | 581.2260  | 0.0000      |
| 30  | A    | 453.0764   | 0.1632      | 0.0008    | 3.9063      |
| 31  | A    | 475.2926   | 0.1609      | 27.6130   | 0.0000      |
| 32  | A    | 476.8966   | 0.1642      | 0.0000    | 0.5802      |
| 33  | A    | 600.5925   | 1.9845      | 3.1502    | 0.0000      |
| 34  | A    | 600.7358   | 2.0214      | 0.0000    | 34.1398     |
| 35  | A    | 619.5531   | 2.9185      | 15.8022   | 0.0000      |
| 36  | A    | 619.6900   | 2.8808      | 0.0000    | 12.7310     |

|    |   |           |         |          |          |
|----|---|-----------|---------|----------|----------|
| 37 | A | 653.1255  | 2.9669  | 0.0000   | 0.6864   |
| 38 | A | 656.2972  | 3.0467  | 6.3806   | 0.0000   |
| 39 | A | 681.0338  | 1.7489  | 0.0000   | 0.1431   |
| 40 | A | 681.2853  | 1.6427  | 0.1619   | 0.0000   |
| 41 | A | 683.6794  | 3.0908  | 0.4076   | 0.0000   |
| 42 | A | 684.8543  | 2.7258  | 0.0000   | 0.4242   |
| 43 | A | 749.3812  | 3.4100  | 0.0000   | 0.6502   |
| 44 | A | 751.3625  | 3.6243  | 0.0000   | 1.1704   |
| 45 | A | 752.7729  | 4.0135  | 47.3364  | 0.0000   |
| 46 | A | 754.3879  | 3.1023  | 136.0807 | 0.0000   |
| 47 | A | 1071.7502 | 4.6268  | 10.7742  | 0.0000   |
| 48 | A | 1078.2997 | 5.1600  | 0.0000   | 1.1779   |
| 49 | A | 1085.4712 | 6.9052  | 0.0000   | 1.8650   |
| 50 | A | 1093.5465 | 7.7522  | 231.6120 | 0.0000   |
| 51 | A | 1133.2539 | 1.4976  | 0.0000   | 0.5758   |
| 52 | A | 1136.9362 | 6.9165  | 3.1513   | 0.0000   |
| 53 | A | 1138.4527 | 1.4239  | 137.8484 | 0.0000   |
| 54 | A | 1140.9329 | 5.3280  | 0.0000   | 5.6337   |
| 55 | A | 1356.0951 | 6.9020  | 42.9539  | 0.0000   |
| 56 | A | 1357.5970 | 6.8445  | 0.0000   | 29.7692  |
| 57 | A | 1419.7404 | 14.4341 | 0.0000   | 12.5161  |
| 58 | A | 1421.2864 | 14.3257 | 152.1915 | 0.0000   |
| 59 | A | 1455.0468 | 12.7595 | 0.0000   | 2.1058   |
| 60 | A | 1458.5328 | 13.0108 | 577.3470 | 0.0000   |
| 61 | A | 1500.2339 | 6.3004  | 32.0330  | 0.0000   |
| 62 | A | 1504.0336 | 6.0374  | 0.0000   | 1.5383   |
| 63 | A | 1601.1642 | 13.9175 | 0.0000   | 5.1006   |
| 64 | A | 1602.5573 | 13.6389 | 108.3049 | 0.0000   |
| 65 | A | 1621.7413 | 6.1764  | 0.0000   | 12.2080  |
| 66 | A | 1623.6043 | 4.0561  | 65.9623  | 0.0000   |
| 67 | A | 1658.7916 | 2.6639  | 0.0000   | 15.4529  |
| 68 | A | 1666.2676 | 3.3680  | 712.5070 | 0.0000   |
| 69 | A | 3582.8482 | 7.9111  | 136.9725 | 0.0425   |
| 70 | A | 3583.0295 | 7.9115  | 0.0403   | 144.9273 |
| 71 | A | 3694.1702 | 8.8707  | 0.0865   | 26.9735  |
| 72 | A | 3694.3232 | 8.8716  | 117.0706 | 0.0199   |

04\_hb

| NM# | Symm | Wavenumber | Force Const | IR Intens | Raman Activ |
|-----|------|------------|-------------|-----------|-------------|
| 1   | AU   | 13.3790    | 0.0011      | 0.0854    | 0.0000      |
| 2   | AU   | 19.1715    | 0.0023      | 1.6263    | 0.0000      |
| 3   | AG   | 41.4822    | 0.0117      | 0.0000    | 6.4793      |
| 4   | AU   | 50.8448    | 0.0166      | 5.3343    | 0.0000      |
| 5   | AG   | 62.0690    | 0.0295      | 0.0000    | 0.7036      |
| 6   | AG   | 102.6315   | 0.0662      | 0.0000    | 1.3917      |
| 7   | AG   | 113.8876   | 0.1015      | 0.0000    | 0.6874      |
| 8   | AU   | 114.7576   | 0.1094      | 1.2678    | 0.0000      |



|    |    |           |         |          |         |
|----|----|-----------|---------|----------|---------|
| 9  | AG | 196.8076  | 0.2707  | 0.0000   | 1.9145  |
| 10 | AU | 196.8734  | 0.3030  | 9.2578   | 0.0000  |
| 11 | AG | 284.5989  | 0.7317  | 0.0000   | 2.1272  |
| 12 | AU | 285.4491  | 0.7694  | 5.4466   | 0.0000  |
| 13 | AU | 290.7044  | 0.4144  | 4.3992   | 0.0000  |
| 14 | AG | 296.2013  | 0.3840  | 0.0000   | 3.2387  |
| 15 | AU | 317.4624  | 0.4118  | 34.9299  | 0.0000  |
| 16 | AG | 320.6310  | 0.3531  | 0.0000   | 5.1363  |
| 17 | AG | 349.1464  | 0.0951  | 0.0000   | 3.2568  |
| 18 | AU | 356.1098  | 0.0987  | 235.0049 | 0.0000  |
| 19 | AG | 362.5053  | 0.3257  | 0.0000   | 3.0996  |
| 20 | AU | 366.7296  | 0.3099  | 37.1167  | 0.0000  |
| 21 | AG | 428.7920  | 0.7589  | 0.0000   | 5.2249  |
| 22 | AU | 430.5832  | 0.6457  | 25.5118  | 0.0000  |
| 23 | AG | 454.7228  | 1.3094  | 0.0000   | 8.1188  |
| 24 | AU | 457.8128  | 1.3656  | 2.9284   | 0.0000  |
| 25 | AU | 463.2936  | 0.4902  | 0.4886   | 0.0000  |
| 26 | AG | 470.0111  | 0.5313  | 0.0000   | 0.2266  |
| 27 | AU | 519.0313  | 1.7309  | 21.5821  | 0.0000  |
| 28 | AG | 519.3174  | 1.6765  | 0.0000   | 20.9828 |
| 29 | AG | 637.0038  | 0.8633  | 0.0000   | 5.2055  |
| 30 | AU | 646.5545  | 1.0232  | 13.1314  | 0.0000  |
| 31 | AG | 660.9022  | 0.3181  | 0.0000   | 1.7808  |
| 32 | AU | 691.8939  | 1.9756  | 3.4934   | 0.0000  |
| 33 | AG | 693.9474  | 2.6340  | 0.0000   | 1.6151  |
| 34 | AG | 697.9067  | 2.9630  | 0.0000   | 5.4765  |
| 35 | AU | 701.5891  | 2.5516  | 22.7659  | 0.0000  |
| 36 | AU | 717.9327  | 0.3757  | 81.9417  | 0.0000  |
| 37 | AU | 731.0210  | 2.2068  | 41.8457  | 0.0000  |
| 38 | AG | 736.2629  | 1.7385  | 0.0000   | 1.5598  |
| 39 | AU | 761.6809  | 2.7945  | 28.6361  | 0.0000  |
| 40 | AG | 764.7648  | 2.8450  | 0.0000   | 84.6876 |
| 41 | AG | 891.6484  | 0.7570  | 0.0000   | 0.6678  |
| 42 | AU | 891.8961  | 0.6427  | 53.2433  | 0.0000  |
| 43 | AG | 893.3499  | 1.2334  | 0.0000   | 0.6294  |
| 44 | AU | 902.4526  | 1.8934  | 184.9767 | 0.0000  |
| 45 | AU | 1102.2716 | 1.3352  | 88.1298  | 0.0000  |
| 46 | AG | 1116.6486 | 1.4052  | 0.0000   | 3.2215  |
| 47 | AU | 1136.4339 | 2.9588  | 114.4276 | 0.0000  |
| 48 | AG | 1137.7563 | 2.8435  | 0.0000   | 11.1821 |
| 49 | AG | 1201.5041 | 2.0515  | 0.0000   | 0.9944  |
| 50 | AU | 1202.9643 | 1.8874  | 119.4247 | 0.0000  |
| 51 | AU | 1258.4012 | 4.2921  | 349.6943 | 0.0000  |
| 52 | AG | 1259.4600 | 4.1214  | 0.0000   | 1.1803  |
| 53 | AU | 1342.6789 | 5.6274  | 74.4852  | 0.0000  |
| 54 | AG | 1343.8231 | 5.2651  | 0.0000   | 19.1840 |
| 55 | AG | 1425.2498 | 8.1450  | 0.0000   | 28.3914 |
| 56 | AU | 1428.3892 | 10.1718 | 235.0301 | 0.0000  |
| 57 | AG | 1458.4810 | 9.4508  | 0.0000   | 14.4405 |
| 58 | AU | 1467.1567 | 10.8846 | 139.7167 | 0.0000  |

|    |    |           |         |           |          |
|----|----|-----------|---------|-----------|----------|
| 59 | AG | 1533.5459 | 10.2443 | 0.0000    | 7.8800   |
| 60 | AU | 1536.2582 | 5.6068  | 992.1691  | 0.0000   |
| 61 | AU | 1621.2546 | 8.9122  | 43.6110   | 0.0000   |
| 62 | AG | 1621.8248 | 12.3135 | 0.0000    | 23.0278  |
| 63 | AU | 1662.6821 | 3.0033  | 165.1859  | 0.0000   |
| 64 | AG | 1674.6348 | 2.4225  | 0.0000    | 4.5159   |
| 65 | AG | 1696.8419 | 6.7179  | 0.0000    | 32.5997  |
| 66 | AU | 1701.9313 | 6.3325  | 363.9168  | 0.0000   |
| 67 | AG | 3215.5429 | 6.6615  | 0.0000    | 268.5909 |
| 68 | AU | 3215.5475 | 6.6616  | 3.2006    | 0.0000   |
| 69 | AG | 3386.9957 | 7.2049  | 0.0000    | 958.8319 |
| 70 | AU | 3415.5243 | 7.3274  | 2111.3591 | 0.0000   |
| 71 | AG | 3692.8116 | 8.7425  | 0.0000    | 103.6969 |
| 72 | AU | 3692.9345 | 8.7453  | 229.0849  | 0.0000   |

04\_p1

| NM# | Symm | Wavenumber | Force Const | IR Intens | Raman Activ |
|-----|------|------------|-------------|-----------|-------------|
| 1   | A    | 18.0043    | 0.0020      | 0.2860    | 1.2574      |
| 2   | A    | 33.8916    | 0.0081      | 0.1101    | 2.0214      |
| 3   | A    | 44.9263    | 0.0144      | 0.2440    | 0.8541      |
| 4   | A    | 50.4702    | 0.0141      | 0.1487    | 1.5824      |
| 5   | A    | 62.3751    | 0.0240      | 0.5825    | 1.6486      |
| 6   | A    | 88.0485    | 0.0498      | 0.1218    | 1.7917      |
| 7   | A    | 122.5669   | 0.0796      | 5.0708    | 0.4683      |
| 8   | A    | 130.6033   | 0.0699      | 1.2448    | 0.8344      |
| 9   | A    | 202.3122   | 0.2193      | 1.4709    | 0.5291      |
| 10  | A    | 214.3456   | 0.2450      | 0.9186    | 0.5018      |
| 11  | A    | 281.1407   | 0.3530      | 6.1793    | 0.6052      |
| 12  | A    | 281.8652   | 0.3687      | 2.3980    | 0.6724      |
| 13  | A    | 295.9642   | 0.2474      | 6.6977    | 0.4341      |
| 14  | A    | 299.8049   | 0.3136      | 2.6489    | 0.0953      |
| 15  | A    | 302.0991   | 0.3530      | 5.2853    | 0.5891      |
| 16  | A    | 306.0376   | 0.3646      | 15.2467   | 1.9180      |
| 17  | A    | 347.0853   | 0.3956      | 0.8708    | 0.0445      |
| 18  | A    | 349.6987   | 0.3594      | 3.2870    | 0.2003      |
| 19  | A    | 363.8389   | 0.1067      | 32.8754   | 0.4286      |
| 20  | A    | 401.3779   | 0.1376      | 17.6428   | 1.2755      |
| 21  | A    | 445.5964   | 0.7442      | 7.7530    | 1.9040      |
| 22  | A    | 448.9836   | 0.5246      | 8.0912    | 4.0116      |
| 23  | A    | 455.2911   | 1.3217      | 0.6974    | 3.4398      |
| 24  | A    | 457.1762   | 0.9302      | 1.9721    | 2.0128      |
| 25  | A    | 469.8934   | 0.5018      | 10.7304   | 0.9381      |
| 26  | A    | 473.8978   | 0.5360      | 1.7830    | 0.1488      |
| 27  | A    | 516.1052   | 1.6519      | 5.4778    | 6.1028      |
| 28  | A    | 517.2320   | 1.6211      | 6.4649    | 11.6537     |
| 29  | A    | 561.5435   | 0.2559      | 305.2122  | 2.8773      |
| 30  | A    | 598.8584   | 0.3146      | 291.4066  | 2.0067      |

|    |   |           |         |          |          |
|----|---|-----------|---------|----------|----------|
| 31 | A | 637.3871  | 1.0692  | 1.3354   | 1.7515   |
| 32 | A | 638.0618  | 1.0694  | 6.0359   | 0.8917   |
| 33 | A | 689.0360  | 3.1005  | 7.0955   | 0.8108   |
| 34 | A | 693.8514  | 2.9170  | 9.8186   | 0.6788   |
| 35 | A | 698.3278  | 2.2553  | 15.7419  | 0.6330   |
| 36 | A | 700.0388  | 2.8441  | 5.2067   | 1.1819   |
| 37 | A | 738.4058  | 2.7949  | 66.7627  | 3.1313   |
| 38 | A | 739.6762  | 2.7241  | 7.4236   | 0.9885   |
| 39 | A | 760.4996  | 2.6180  | 16.1292  | 32.6100  |
| 40 | A | 761.9559  | 2.5408  | 16.7365  | 12.8988  |
| 41 | A | 888.5342  | 1.4987  | 31.1193  | 0.5001   |
| 42 | A | 890.7659  | 1.4428  | 97.6068  | 0.3702   |
| 43 | A | 893.1553  | 0.7154  | 45.9502  | 0.2414   |
| 44 | A | 895.6699  | 0.6774  | 16.2604  | 0.2399   |
| 45 | A | 1111.0518 | 1.4106  | 31.7969  | 0.8277   |
| 46 | A | 1120.4812 | 1.4632  | 54.7099  | 0.9762   |
| 47 | A | 1134.3983 | 3.1600  | 50.4344  | 4.2726   |
| 48 | A | 1136.1332 | 3.0137  | 30.6305  | 4.8249   |
| 49 | A | 1201.4116 | 1.8039  | 78.3127  | 0.8646   |
| 50 | A | 1203.6571 | 1.8124  | 29.0423  | 0.3256   |
| 51 | A | 1252.7102 | 4.1012  | 53.8591  | 0.3029   |
| 52 | A | 1254.7838 | 3.9629  | 148.6628 | 1.2285   |
| 53 | A | 1342.2765 | 5.7465  | 28.8177  | 0.3506   |
| 54 | A | 1348.9340 | 5.5500  | 29.5757  | 1.4294   |
| 55 | A | 1414.8786 | 10.1359 | 25.4517  | 2.1401   |
| 56 | A | 1422.5157 | 10.4789 | 54.0555  | 23.7414  |
| 57 | A | 1467.2073 | 9.1148  | 48.2773  | 1.4040   |
| 58 | A | 1470.4577 | 8.7365  | 45.2074  | 2.2668   |
| 59 | A | 1512.0961 | 8.0654  | 284.7565 | 2.0368   |
| 60 | A | 1524.0813 | 7.8816  | 784.6372 | 1.0131   |
| 61 | A | 1631.4572 | 5.7662  | 27.6155  | 4.4211   |
| 62 | A | 1633.2853 | 2.5572  | 104.8093 | 1.8578   |
| 63 | A | 1636.0803 | 11.2354 | 9.8008   | 4.6291   |
| 64 | A | 1643.2804 | 2.2597  | 43.3781  | 0.9824   |
| 65 | A | 1680.8272 | 9.4246  | 34.3744  | 20.6166  |
| 66 | A | 1685.1791 | 9.1612  | 99.2409  | 17.7158  |
| 67 | A | 3217.1216 | 6.6697  | 3.2708   | 65.5438  |
| 68 | A | 3218.6910 | 6.6754  | 1.9278   | 96.6961  |
| 69 | A | 3568.7445 | 7.8535  | 52.4957  | 105.1515 |
| 70 | A | 3573.2693 | 7.8736  | 57.6545  | 159.2819 |
| 71 | A | 3674.3831 | 8.7538  | 37.0831  | 21.8854  |
| 72 | A | 3683.0358 | 8.8008  | 42.7606  | 40.7504  |

-----  
04\_p2

| NM# | Symm | Wavenumber | Force Const | IR Intens | Raman Activ |
|-----|------|------------|-------------|-----------|-------------|
| 1   | A    | 10.3147    | 0.0006      | 0.6634    | 0.2506      |
| 2   | A    | 13.5061    | 0.0011      | 0.7555    | 3.5954      |

|    |   |           |        |          |         |
|----|---|-----------|--------|----------|---------|
| 3  | A | 35.9988   | 0.0095 | 0.0557   | 2.8484  |
| 4  | A | 47.4825   | 0.0136 | 1.2855   | 0.1638  |
| 5  | A | 57.3089   | 0.0192 | 0.2083   | 0.2329  |
| 6  | A | 77.5871   | 0.0350 | 0.0133   | 1.1489  |
| 7  | A | 118.7719  | 0.0725 | 0.0098   | 0.7264  |
| 8  | A | 121.5851  | 0.0796 | 4.4284   | 0.1173  |
| 9  | A | 204.6003  | 0.2329 | 1.3847   | 0.2987  |
| 10 | A | 210.9571  | 0.2492 | 0.5867   | 0.8791  |
| 11 | A | 280.1766  | 0.3520 | 1.9335   | 0.4554  |
| 12 | A | 281.4670  | 0.3874 | 7.9412   | 1.0478  |
| 13 | A | 295.5411  | 0.3566 | 11.0587  | 1.7119  |
| 14 | A | 299.8562  | 0.3483 | 0.8985   | 0.0646  |
| 15 | A | 300.1789  | 0.3075 | 3.9845   | 0.2057  |
| 16 | A | 305.8123  | 0.3811 | 0.0007   | 0.1870  |
| 17 | A | 348.6655  | 0.5378 | 2.4843   | 0.1695  |
| 18 | A | 348.7847  | 0.5644 | 0.0107   | 0.2278  |
| 19 | A | 405.3940  | 0.1588 | 2.7678   | 0.2200  |
| 20 | A | 406.1623  | 0.1477 | 17.1809  | 1.5027  |
| 21 | A | 438.2996  | 0.1937 | 330.4299 | 0.0507  |
| 22 | A | 450.8599  | 0.2815 | 0.2505   | 3.6302  |
| 23 | A | 453.0445  | 0.9881 | 3.5356   | 1.7729  |
| 24 | A | 454.9170  | 0.9492 | 2.0187   | 3.7662  |
| 25 | A | 462.0581  | 0.4195 | 97.2441  | 0.9735  |
| 26 | A | 464.3089  | 0.3662 | 5.7263   | 0.4157  |
| 27 | A | 490.2864  | 0.2831 | 338.5528 | 0.4206  |
| 28 | A | 501.4679  | 0.2644 | 50.2178  | 0.6125  |
| 29 | A | 515.9617  | 1.3467 | 29.9824  | 0.6030  |
| 30 | A | 516.3165  | 1.3200 | 12.7379  | 18.8143 |
| 31 | A | 634.6327  | 1.0661 | 1.2501   | 1.5610  |
| 32 | A | 635.0351  | 1.0621 | 1.1493   | 0.9536  |
| 33 | A | 689.6291  | 3.0326 | 6.6214   | 0.4799  |
| 34 | A | 691.4764  | 2.9205 | 17.6682  | 1.4137  |
| 35 | A | 693.8493  | 3.2261 | 0.8684   | 0.5438  |
| 36 | A | 696.5266  | 3.1602 | 5.8075   | 0.6065  |
| 37 | A | 733.9974  | 2.9763 | 31.6137  | 0.8901  |
| 38 | A | 738.1039  | 2.9884 | 0.0121   | 1.1422  |
| 39 | A | 760.4053  | 2.7186 | 8.5758   | 0.6489  |
| 40 | A | 761.0322  | 2.6670 | 16.7028  | 41.2880 |
| 41 | A | 885.2563  | 1.6701 | 15.6605  | 0.4098  |
| 42 | A | 887.8635  | 1.5025 | 117.5325 | 0.5307  |
| 43 | A | 893.1797  | 0.6770 | 55.8204  | 0.2851  |
| 44 | A | 896.0052  | 0.6598 | 0.3251   | 0.0982  |
| 45 | A | 1100.4599 | 1.3703 | 5.6870   | 0.4884  |
| 46 | A | 1104.0590 | 1.3796 | 66.7280  | 0.6860  |
| 47 | A | 1129.0982 | 3.3462 | 0.2498   | 3.9196  |
| 48 | A | 1132.8722 | 3.1822 | 80.0216  | 5.4058  |
| 49 | A | 1198.7845 | 1.8963 | 26.7287  | 0.0127  |
| 50 | A | 1198.7886 | 1.7503 | 84.2195  | 1.0966  |
| 51 | A | 1247.6017 | 3.6955 | 0.4242   | 0.3644  |
| 52 | A | 1253.1925 | 4.0830 | 202.1199 | 1.1844  |

|    |   |           |         |          |          |
|----|---|-----------|---------|----------|----------|
| 53 | A | 1342.1292 | 6.0316  | 13.7348  | 1.5433   |
| 54 | A | 1345.3128 | 5.9759  | 43.8004  | 0.2435   |
| 55 | A | 1416.0049 | 10.0010 | 78.4288  | 0.1735   |
| 56 | A | 1422.5853 | 9.6316  | 5.6842   | 16.4405  |
| 57 | A | 1467.0960 | 9.1873  | 21.5690  | 1.3543   |
| 58 | A | 1469.7734 | 8.7375  | 52.8497  | 4.3264   |
| 59 | A | 1512.4373 | 7.6863  | 7.4105   | 2.0431   |
| 60 | A | 1528.0257 | 6.9719  | 956.0088 | 0.3499   |
| 61 | A | 1631.5635 | 7.5851  | 38.2134  | 2.5063   |
| 62 | A | 1631.8813 | 12.5715 | 10.6720  | 4.7258   |
| 63 | A | 1636.0933 | 2.4817  | 175.0821 | 0.4893   |
| 64 | A | 1636.1880 | 2.1308  | 5.7257   | 1.4784   |
| 65 | A | 1685.8902 | 10.7502 | 69.9313  | 18.3096  |
| 66 | A | 1686.6551 | 10.1673 | 115.3898 | 9.7078   |
| 67 | A | 3217.5471 | 6.6709  | 0.3665   | 18.7576  |
| 68 | A | 3217.8639 | 6.6720  | 4.4641   | 146.4586 |
| 69 | A | 3586.2893 | 7.9280  | 124.4407 | 8.8385   |
| 70 | A | 3586.4720 | 7.9280  | 24.7032  | 188.8129 |
| 71 | A | 3700.3775 | 8.8966  | 11.1828  | 32.4677  |
| 72 | A | 3700.5288 | 8.8974  | 83.6417  | 18.7030  |

04\_p3

| NM# | Symm | Wavenumber | Force Const | IR Intens | Raman Activ |
|-----|------|------------|-------------|-----------|-------------|
| 1   | A    | 9.3746     | 0.0005      | 0.7959    | 0.3452      |
| 2   | A    | 17.4698    | 0.0019      | 0.1330    | 3.6026      |
| 3   | A    | 39.7394    | 0.0112      | 0.1096    | 3.3478      |
| 4   | A    | 50.5117    | 0.0186      | 1.5048    | 0.1634      |
| 5   | A    | 57.5086    | 0.0173      | 0.1016    | 0.2585      |
| 6   | A    | 78.0173    | 0.0365      | 0.0199    | 1.1204      |
| 7   | A    | 119.8554   | 0.0779      | 0.2638    | 0.5863      |
| 8   | A    | 125.1391   | 0.0819      | 3.3758    | 0.1639      |
| 9   | A    | 205.0683   | 0.2257      | 0.6615    | 0.2472      |
| 10  | A    | 212.3929   | 0.2454      | 1.3070    | 0.9350      |
| 11  | A    | 280.4265   | 0.3597      | 2.8482    | 0.7699      |
| 12  | A    | 281.0213   | 0.3334      | 5.0551    | 0.7722      |
| 13  | A    | 298.8445   | 0.3225      | 1.0825    | 0.7655      |
| 14  | A    | 299.4758   | 0.3317      | 2.9388    | 0.2403      |
| 15  | A    | 300.1803   | 0.3370      | 1.4478    | 0.8882      |
| 16  | A    | 304.6494   | 0.3661      | 15.1704   | 0.4549      |
| 17  | A    | 348.0018   | 0.5167      | 1.1585    | 0.1187      |
| 18  | A    | 349.2142   | 0.5691      | 0.9472    | 0.1830      |
| 19  | A    | 401.6470   | 0.1363      | 5.9610    | 0.9977      |
| 20  | A    | 411.2912   | 0.1541      | 9.2657    | 0.6789      |
| 21  | A    | 439.4093   | 0.2301      | 102.0548  | 1.1361      |
| 22  | A    | 445.0981   | 0.2549      | 95.6484   | 1.5078      |
| 23  | A    | 453.9496   | 0.9988      | 4.7127    | 1.7714      |
| 24  | A    | 454.0524   | 1.0704      | 3.9947    | 3.5680      |

|    |   |           |         |          |          |
|----|---|-----------|---------|----------|----------|
| 25 | A | 463.3195  | 0.4420  | 30.0848  | 1.0732   |
| 26 | A | 466.1235  | 0.4230  | 49.4468  | 1.4836   |
| 27 | A | 491.8202  | 0.2779  | 109.7146 | 0.8933   |
| 28 | A | 503.6556  | 0.2644  | 261.9909 | 0.7190   |
| 29 | A | 515.9984  | 1.5282  | 7.2432   | 11.4229  |
| 30 | A | 517.0129  | 1.2168  | 29.3674  | 7.9735   |
| 31 | A | 635.3718  | 1.0689  | 1.2776   | 1.0029   |
| 32 | A | 636.1141  | 1.0669  | 2.0256   | 1.4914   |
| 33 | A | 691.4313  | 2.9725  | 10.8592  | 0.7028   |
| 34 | A | 692.5582  | 2.9898  | 14.3714  | 0.4356   |
| 35 | A | 694.4920  | 3.1888  | 5.3822   | 0.6450   |
| 36 | A | 697.8092  | 3.1696  | 0.4921   | 1.2457   |
| 37 | A | 734.7330  | 2.9093  | 12.1262  | 0.8961   |
| 38 | A | 737.2337  | 2.8564  | 25.0136  | 0.8871   |
| 39 | A | 760.4149  | 2.6975  | 6.9974   | 35.7152  |
| 40 | A | 760.9306  | 2.7168  | 19.7145  | 7.5986   |
| 41 | A | 885.7253  | 1.0997  | 34.3471  | 0.4141   |
| 42 | A | 886.3894  | 0.9286  | 35.0516  | 0.2256   |
| 43 | A | 890.4140  | 1.2963  | 90.1666  | 0.4562   |
| 44 | A | 898.0339  | 0.6718  | 29.4832  | 0.1836   |
| 45 | A | 1103.5677 | 1.3735  | 57.5573  | 0.9146   |
| 46 | A | 1104.5857 | 1.3684  | 17.0403  | 0.9624   |
| 47 | A | 1132.9255 | 3.3606  | 18.5073  | 3.7701   |
| 48 | A | 1136.1979 | 3.3057  | 58.1106  | 4.5446   |
| 49 | A | 1199.1552 | 1.7721  | 48.7238  | 0.4475   |
| 50 | A | 1201.1920 | 1.8116  | 70.8815  | 0.4974   |
| 51 | A | 1251.4463 | 3.9230  | 36.3624  | 0.9095   |
| 52 | A | 1254.0223 | 4.0722  | 161.0022 | 0.1766   |
| 53 | A | 1341.4806 | 5.9814  | 13.7540  | 1.4071   |
| 54 | A | 1345.3376 | 6.1643  | 42.4076  | 0.2430   |
| 55 | A | 1417.2630 | 9.8109  | 70.9596  | 1.9584   |
| 56 | A | 1422.1905 | 9.6612  | 22.8283  | 15.6742  |
| 57 | A | 1466.6678 | 8.9849  | 19.9616  | 4.3544   |
| 58 | A | 1467.5963 | 9.2587  | 60.5901  | 1.1512   |
| 59 | A | 1514.3121 | 7.6340  | 207.7918 | 2.3505   |
| 60 | A | 1524.1222 | 7.2289  | 802.7652 | 0.5126   |
| 61 | A | 1630.5825 | 2.9457  | 130.2827 | 0.9521   |
| 62 | A | 1631.7083 | 5.6812  | 12.0088  | 2.2084   |
| 63 | A | 1634.5762 | 3.2179  | 28.0917  | 3.1427   |
| 64 | A | 1637.2579 | 3.6588  | 78.3780  | 3.7123   |
| 65 | A | 1684.4132 | 11.0142 | 34.0570  | 18.9120  |
| 66 | A | 1686.3194 | 10.7221 | 117.6848 | 12.6469  |
| 67 | A | 3219.5392 | 6.6804  | 3.9696   | 75.6446  |
| 68 | A | 3224.8349 | 6.7002  | 1.9911   | 77.0405  |
| 69 | A | 3584.7064 | 7.9193  | 76.6561  | 137.2304 |
| 70 | A | 3586.7663 | 7.9294  | 63.6109  | 114.8137 |
| 71 | A | 3700.0583 | 8.8943  | 39.8242  | 36.4317  |
| 72 | A | 3700.5870 | 8.8968  | 54.2912  | 28.4130  |

04\_p4

| NM# | Symm | Wavenumber | Force Const | IR Intens | Raman Activ |
|-----|------|------------|-------------|-----------|-------------|
| 1   | AU   | 14.8533    | 0.0013      | 1.1163    | 0.0000      |
| 2   | AG   | 30.8168    | 0.0063      | 0.0000    | 2.9863      |
| 3   | AG   | 40.3763    | 0.0096      | 0.0000    | 3.0824      |
| 4   | AU   | 44.9772    | 0.0127      | 1.1090    | 0.0000      |
| 5   | AU   | 52.0790    | 0.0147      | 2.0206    | 0.0000      |
| 6   | AG   | 81.5733    | 0.0365      | 0.0000    | 2.6002      |
| 7   | AG   | 120.2340   | 0.0789      | 0.0000    | 0.5598      |
| 8   | AU   | 121.2688   | 0.0748      | 5.5949    | 0.0000      |
| 9   | AU   | 200.5101   | 0.2290      | 1.8700    | 0.0000      |
| 10  | AG   | 210.1624   | 0.2524      | 0.0000    | 0.9247      |
| 11  | AU   | 281.0059   | 0.3516      | 10.5086   | 0.0000      |
| 12  | AG   | 281.5297   | 0.3586      | 0.0000    | 1.2591      |
| 13  | AG   | 298.0350   | 0.2633      | 0.0000    | 1.2552      |
| 14  | AU   | 299.5817   | 0.2828      | 12.0790   | 0.0000      |
| 15  | AG   | 301.7243   | 0.3811      | 0.0000    | 2.2430      |
| 16  | AU   | 302.1708   | 0.3734      | 11.3593   | 0.0000      |
| 17  | AU   | 348.0242   | 0.4844      | 2.7456    | 0.0000      |
| 18  | AG   | 348.7802   | 0.4927      | 0.0000    | 0.3805      |
| 19  | AU   | 388.3617   | 0.1196      | 25.4375   | 0.0000      |
| 20  | AG   | 389.8204   | 0.1193      | 0.0000    | 0.9266      |
| 21  | AU   | 443.8393   | 0.3523      | 124.3589  | 0.0000      |
| 22  | AG   | 444.9154   | 0.5030      | 0.0000    | 4.5922      |
| 23  | AU   | 454.8845   | 1.3398      | 1.0985    | 0.0000      |
| 24  | AG   | 455.2699   | 1.3438      | 0.0000    | 5.6979      |
| 25  | AG   | 466.8211   | 0.4243      | 0.0000    | 0.5109      |
| 26  | AU   | 468.2686   | 0.4773      | 43.5794   | 0.0000      |
| 27  | AU   | 511.2555   | 0.3554      | 399.6744  | 0.0000      |
| 28  | AG   | 515.4986   | 1.5721      | 0.0000    | 17.0456     |
| 29  | AU   | 517.5393   | 0.5304      | 273.2521  | 0.0000      |
| 30  | AG   | 526.0153   | 0.2380      | 0.0000    | 4.3179      |
| 31  | AG   | 635.3238   | 1.0743      | 0.0000    | 2.7252      |
| 32  | AU   | 635.8140   | 1.0724      | 2.0014    | 0.0000      |
| 33  | AU   | 689.3836   | 3.0009      | 21.6592   | 0.0000      |
| 34  | AG   | 691.3222   | 2.8765      | 0.0000    | 2.1300      |
| 35  | AU   | 694.8663   | 3.0506      | 19.5254   | 0.0000      |
| 36  | AG   | 696.0595   | 3.0943      | 0.0000    | 1.2303      |
| 37  | AU   | 736.9218   | 2.8402      | 44.4366   | 0.0000      |
| 38  | AG   | 739.8571   | 2.8809      | 0.0000    | 6.7140      |
| 39  | AU   | 760.3508   | 2.7289      | 29.3055   | 0.0000      |
| 40  | AG   | 761.1533   | 2.6704      | 0.0000    | 43.9920     |
| 41  | AG   | 885.4413   | 1.7111      | 0.0000    | 0.8069      |
| 42  | AU   | 889.3085   | 1.6131      | 124.3308  | 0.0000      |
| 43  | AU   | 894.8370   | 0.6663      | 54.8920   | 0.0000      |
| 44  | AG   | 895.1717   | 0.6612      | 0.0000    | 0.2938      |
| 45  | AG   | 1105.0680  | 1.3732      | 0.0000    | 2.4343      |
| 46  | AU   | 1107.7758  | 1.4024      | 83.1264   | 0.0000      |

SI-207

|    |    |           |         |          |          |
|----|----|-----------|---------|----------|----------|
| 47 | AU | 1129.6940 | 3.4822  | 65.3281  | 0.0000   |
| 48 | AG | 1134.6013 | 3.2043  | 0.0000   | 9.2709   |
| 49 | AG | 1196.6943 | 1.8626  | 0.0000   | 1.2030   |
| 50 | AU | 1199.8545 | 1.6776  | 102.4788 | 0.0000   |
| 51 | AG | 1251.0365 | 3.7896  | 0.0000   | 1.3303   |
| 52 | AU | 1253.9517 | 4.2633  | 233.0050 | 0.0000   |
| 53 | AG | 1344.6293 | 5.9006  | 0.0000   | 2.4862   |
| 54 | AU | 1346.4672 | 5.9491  | 43.7663  | 0.0000   |
| 55 | AU | 1413.2902 | 9.7058  | 70.7453  | 0.0000   |
| 56 | AG | 1423.7746 | 9.8441  | 0.0000   | 20.0618  |
| 57 | AG | 1468.2726 | 9.0049  | 0.0000   | 6.5048   |
| 58 | AU | 1468.2736 | 9.1981  | 68.5103  | 0.0000   |
| 59 | AG | 1512.0723 | 7.7067  | 0.0000   | 2.9758   |
| 60 | AU | 1527.5161 | 7.2042  | 990.5199 | 0.0000   |
| 61 | AG | 1631.7646 | 4.4526  | 0.0000   | 4.2115   |
| 62 | AU | 1632.9152 | 7.3908  | 45.8835  | 0.0000   |
| 63 | AG | 1636.8854 | 3.1034  | 0.0000   | 5.9286   |
| 64 | AU | 1638.6282 | 2.4410  | 176.5665 | 0.0000   |
| 65 | AG | 1686.3621 | 9.8823  | 0.0000   | 28.8483  |
| 66 | AU | 1686.6964 | 10.9222 | 154.7627 | 0.0000   |
| 67 | AU | 3218.3374 | 6.6744  | 3.9140   | 0.0000   |
| 68 | AG | 3218.3403 | 6.6744  | 0.0000   | 203.1013 |
| 69 | AU | 3584.7772 | 7.9220  | 129.7849 | 0.0000   |
| 70 | AG | 3584.7782 | 7.9213  | 0.0000   | 212.6517 |
| 71 | AG | 3695.9901 | 8.8699  | 0.0000   | 57.1446  |
| 72 | AU | 3696.0556 | 8.8703  | 91.7066  | 0.0000   |

05\_hb

| NM# | Symm | Wavenumber | Force Const | IR Intens | Raman Activ |
|-----|------|------------|-------------|-----------|-------------|
| 1   | AU   | 8.9920     | 0.0006      | 0.0909    | 0.0000      |
| 2   | AU   | 14.5716    | 0.0023      | 0.3347    | 0.0000      |
| 3   | AG   | 27.3762    | 0.0064      | 0.0000    | 7.0337      |
| 4   | AU   | 42.7810    | 0.0146      | 4.0465    | 0.0000      |
| 5   | AG   | 60.1157    | 0.0294      | 0.0000    | 0.1399      |
| 6   | AG   | 91.4634    | 0.0650      | 0.0000    | 0.8186      |
| 7   | AG   | 112.4887   | 0.1061      | 0.0000    | 0.6286      |
| 8   | AU   | 112.7558   | 0.1121      | 1.5039    | 0.0000      |
| 9   | AU   | 121.8932   | 0.1619      | 0.2075    | 0.0000      |
| 10  | AG   | 122.1166   | 0.1670      | 0.0000    | 0.3195      |
| 11  | AU   | 197.5236   | 0.3302      | 13.9647   | 0.0000      |
| 12  | AG   | 198.8283   | 0.3019      | 0.0000    | 0.9360      |
| 13  | AU   | 204.8865   | 0.5177      | 1.6548    | 0.0000      |
| 14  | AG   | 205.5374   | 0.5107      | 0.0000    | 3.2336      |
| 15  | AG   | 283.8220   | 0.8336      | 0.0000    | 0.5812      |
| 16  | AU   | 285.0538   | 0.8994      | 5.2465    | 0.0000      |
| 17  | AU   | 311.9053   | 0.2467      | 54.5682   | 0.0000      |
| 18  | AG   | 318.0335   | 0.1329      | 0.0000    | 2.2487      |



|    |    |           |         |          |         |
|----|----|-----------|---------|----------|---------|
| 19 | AU | 318.0885  | 0.7425  | 18.9415  | 0.0000  |
| 20 | AG | 319.5776  | 0.3961  | 0.0000   | 0.9403  |
| 21 | AG | 334.8280  | 0.1847  | 0.0000   | 2.3124  |
| 22 | AU | 338.1430  | 0.1131  | 171.9521 | 0.0000  |
| 23 | AG | 341.8597  | 0.2476  | 0.0000   | 18.4126 |
| 24 | AU | 343.4181  | 0.2272  | 57.6847  | 0.0000  |
| 25 | AG | 410.2274  | 0.5939  | 0.0000   | 4.4590  |
| 26 | AU | 411.9345  | 0.5212  | 32.6784  | 0.0000  |
| 27 | AU | 432.5705  | 1.7572  | 3.6767   | 0.0000  |
| 28 | AG | 433.9653  | 1.9833  | 0.0000   | 10.3874 |
| 29 | AG | 464.9374  | 1.5957  | 0.0000   | 10.6641 |
| 30 | AU | 466.5338  | 1.6470  | 1.8407   | 0.0000  |
| 31 | AU | 555.0853  | 1.8228  | 32.7267  | 0.0000  |
| 32 | AG | 555.8499  | 1.7843  | 0.0000   | 51.0012 |
| 33 | AG | 582.9808  | 1.5954  | 0.0000   | 1.2848  |
| 34 | AU | 585.1477  | 2.0152  | 6.2483   | 0.0000  |
| 35 | AG | 664.2649  | 0.3157  | 0.0000   | 1.7626  |
| 36 | AG | 682.9634  | 1.3536  | 0.0000   | 1.6575  |
| 37 | AU | 689.5817  | 2.3330  | 1.1412   | 0.0000  |
| 38 | AG | 690.1921  | 2.6493  | 0.0000   | 2.0677  |
| 39 | AU | 692.9912  | 1.3520  | 5.6062   | 0.0000  |
| 40 | AU | 709.0777  | 0.7303  | 46.1662  | 0.0000  |
| 41 | AG | 709.5902  | 3.1987  | 0.0000   | 26.1749 |
| 42 | AU | 720.1501  | 0.7399  | 22.7951  | 0.0000  |
| 43 | AU | 731.3022  | 1.4836  | 43.0238  | 0.0000  |
| 44 | AG | 733.1889  | 2.3059  | 0.0000   | 1.4349  |
| 45 | AU | 912.9799  | 5.0980  | 289.4434 | 0.0000  |
| 46 | AG | 913.4781  | 5.0600  | 0.0000   | 23.9413 |
| 47 | AG | 962.5469  | 4.8991  | 0.0000   | 3.1823  |
| 48 | AU | 966.4986  | 5.1346  | 240.5522 | 0.0000  |
| 49 | AU | 1105.8434 | 1.3487  | 36.4720  | 0.0000  |
| 50 | AG | 1119.2446 | 1.4282  | 0.0000   | 6.6356  |
| 51 | AU | 1170.7214 | 7.6505  | 22.3057  | 0.0000  |
| 52 | AG | 1173.7776 | 7.8714  | 0.0000   | 12.0530 |
| 53 | AG | 1261.7321 | 6.7495  | 0.0000   | 3.5583  |
| 54 | AU | 1264.3004 | 6.4929  | 181.6167 | 0.0000  |
| 55 | AU | 1336.0294 | 6.9761  | 48.9199  | 0.0000  |
| 56 | AG | 1336.4325 | 6.6332  | 0.0000   | 24.7602 |
| 57 | AG | 1434.4740 | 8.0642  | 0.0000   | 23.7842 |
| 58 | AU | 1440.2012 | 11.9614 | 466.0276 | 0.0000  |
| 59 | AG | 1475.9181 | 13.4002 | 0.0000   | 23.6330 |
| 60 | AU | 1479.5418 | 14.1049 | 126.2010 | 0.0000  |
| 61 | AG | 1526.9323 | 11.7347 | 0.0000   | 7.2071  |
| 62 | AU | 1530.9210 | 6.1794  | 857.5098 | 0.0000  |
| 63 | AG | 1601.9251 | 15.4176 | 0.0000   | 36.7700 |
| 64 | AU | 1602.3672 | 10.3769 | 53.0180  | 0.0000  |
| 65 | AU | 1656.0249 | 3.7015  | 198.9572 | 0.0000  |
| 66 | AG | 1670.4972 | 3.5330  | 0.0000   | 5.7501  |
| 67 | AG | 1687.5790 | 3.7153  | 0.0000   | 24.3366 |
| 68 | AU | 1692.7424 | 4.5751  | 690.8701 | 0.0000  |

|    |    |           |        |           |           |
|----|----|-----------|--------|-----------|-----------|
| 69 | AG | 3386.2776 | 7.2024 | 0.0000    | 1309.0710 |
| 70 | AU | 3414.5131 | 7.3236 | 2515.2076 | 0.0000    |
| 71 | AG | 3696.0225 | 8.7605 | 0.0000    | 102.4611  |
| 72 | AU | 3696.1028 | 8.7628 | 246.4965  | 0.0000    |

05\_p1

| NM# | Symm | Wavenumber | Force Const | IR Intens | Raman Activ |
|-----|------|------------|-------------|-----------|-------------|
| 1   | A    | 14.2049    | 0.0020      | 0.1919    | 1.2070      |
| 2   | A    | 31.0474    | 0.0062      | 0.3214    | 2.5985      |
| 3   | A    | 37.9058    | 0.0126      | 0.0456    | 1.4959      |
| 4   | A    | 48.9664    | 0.0226      | 0.0253    | 0.0817      |
| 5   | A    | 57.6175    | 0.0318      | 0.1018    | 1.7391      |
| 6   | A    | 84.9126    | 0.0473      | 0.0874    | 1.1770      |
| 7   | A    | 119.8774   | 0.1146      | 1.4218    | 0.2614      |
| 8   | A    | 122.8385   | 0.1228      | 0.0718    | 0.1254      |
| 9   | A    | 127.7396   | 0.0917      | 0.7376    | 0.2973      |
| 10  | A    | 135.2693   | 0.1197      | 2.4721    | 0.7719      |
| 11  | A    | 203.4382   | 0.4430      | 0.7166    | 1.7046      |
| 12  | A    | 204.3381   | 0.4713      | 0.0573    | 0.3235      |
| 13  | A    | 206.6724   | 0.2329      | 1.0020    | 0.4088      |
| 14  | A    | 215.8623   | 0.2389      | 1.4190    | 0.4839      |
| 15  | A    | 281.1806   | 0.4321      | 3.8290    | 0.2599      |
| 16  | A    | 283.4320   | 0.6787      | 2.2342    | 0.1805      |
| 17  | A    | 302.3899   | 0.2364      | 3.6406    | 0.8012      |
| 18  | A    | 309.8912   | 0.2757      | 2.0091    | 0.3365      |
| 19  | A    | 322.7933   | 0.6342      | 1.4410    | 2.0942      |
| 20  | A    | 323.6364   | 0.4554      | 0.5490    | 0.1148      |
| 21  | A    | 330.3168   | 0.6077      | 6.3959    | 1.3134      |
| 22  | A    | 332.3211   | 0.5607      | 6.0112    | 1.1143      |
| 23  | A    | 383.3479   | 0.1389      | 10.9467   | 0.3693      |
| 24  | A    | 403.4135   | 0.2515      | 9.5504    | 3.0999      |
| 25  | A    | 428.7411   | 1.8246      | 0.4575    | 4.9263      |
| 26  | A    | 429.0106   | 1.8769      | 0.1008    | 0.1091      |
| 27  | A    | 437.6359   | 0.2910      | 3.6649    | 0.4874      |
| 28  | A    | 443.9443   | 0.2259      | 38.4284   | 1.3985      |
| 29  | A    | 464.5699   | 1.4131      | 5.0965    | 3.9387      |
| 30  | A    | 465.1834   | 1.5766      | 0.4004    | 2.5206      |
| 31  | A    | 544.4072   | 0.5890      | 106.8501  | 6.9554      |
| 32  | A    | 550.7862   | 1.7661      | 5.6735    | 20.4661     |
| 33  | A    | 566.1386   | 0.4306      | 143.8082  | 8.7381      |
| 34  | A    | 577.9313   | 1.1164      | 24.2400   | 1.3553      |
| 35  | A    | 592.7949   | 0.9051      | 141.5397  | 2.8134      |
| 36  | A    | 620.8462   | 0.3686      | 237.0766  | 4.6737      |
| 37  | A    | 682.1183   | 1.6481      | 2.9027    | 1.0148      |
| 38  | A    | 683.4439   | 1.6159      | 0.1540    | 0.1407      |
| 39  | A    | 688.8171   | 3.2467      | 3.4068    | 1.6392      |
| 40  | A    | 698.2439   | 3.2280      | 2.3001    | 0.5772      |

|    |   |           |         |          |          |
|----|---|-----------|---------|----------|----------|
| 41 | A | 704.7208  | 2.7761  | 15.2952  | 4.0178   |
| 42 | A | 706.6530  | 2.1513  | 11.3707  | 1.4119   |
| 43 | A | 734.8256  | 3.7348  | 26.4804  | 3.1870   |
| 44 | A | 745.3442  | 3.3510  | 15.3535  | 0.8922   |
| 45 | A | 909.9018  | 5.0734  | 1.4264   | 0.0996   |
| 46 | A | 915.6809  | 5.0671  | 203.8087 | 8.0051   |
| 47 | A | 952.7524  | 4.6024  | 11.9388  | 0.2054   |
| 48 | A | 961.2463  | 4.5796  | 145.3045 | 0.4787   |
| 49 | A | 1123.2404 | 1.4402  | 2.6267   | 0.1103   |
| 50 | A | 1124.7207 | 1.4860  | 34.0602  | 2.5066   |
| 51 | A | 1162.6274 | 6.7099  | 1.0017   | 0.5692   |
| 52 | A | 1168.3001 | 6.8072  | 22.0965  | 9.2438   |
| 53 | A | 1256.8946 | 6.1911  | 3.7012   | 0.2497   |
| 54 | A | 1262.7418 | 6.0509  | 119.6470 | 1.7859   |
| 55 | A | 1334.8267 | 6.8823  | 12.0575  | 1.4646   |
| 56 | A | 1338.4108 | 6.3708  | 13.4634  | 3.5931   |
| 57 | A | 1432.0730 | 10.4067 | 2.8768   | 0.4895   |
| 58 | A | 1445.3338 | 10.4027 | 106.5092 | 12.2133  |
| 59 | A | 1477.3300 | 11.3559 | 2.0925   | 0.0761   |
| 60 | A | 1479.5353 | 11.3093 | 135.3445 | 6.5391   |
| 61 | A | 1495.5828 | 10.8776 | 44.6038  | 0.6146   |
| 62 | A | 1514.2559 | 9.6123  | 913.2778 | 1.8025   |
| 63 | A | 1614.6225 | 14.0474 | 15.4255  | 2.5407   |
| 64 | A | 1619.8904 | 8.1982  | 63.9160  | 3.1874   |
| 65 | A | 1634.0213 | 2.4685  | 59.3771  | 3.2826   |
| 66 | A | 1641.3728 | 2.5178  | 33.1547  | 0.2155   |
| 67 | A | 1664.5834 | 8.2455  | 59.1157  | 9.0698   |
| 68 | A | 1674.7868 | 6.3551  | 318.3685 | 22.1335  |
| 69 | A | 3560.6493 | 7.8237  | 133.4090 | 293.4295 |
| 70 | A | 3563.1417 | 7.8349  | 15.5071  | 7.9876   |
| 71 | A | 3668.9045 | 8.7292  | 41.7168  | 48.7367  |
| 72 | A | 3679.1149 | 8.7737  | 56.2292  | 31.9078  |

05\_p2

| NM# | Symm | Wavenumber | Force Const | IR Intens | Raman Activ |
|-----|------|------------|-------------|-----------|-------------|
| 1   | A    | 14.3252    | 0.0019      | 0.3620    | 1.5143      |
| 2   | A    | 22.9725    | 0.0037      | 0.1204    | 2.4858      |
| 3   | A    | 38.8721    | 0.0120      | 0.0333    | 2.8262      |
| 4   | A    | 52.8980    | 0.0285      | 0.6608    | 0.1522      |
| 5   | A    | 59.1921    | 0.0278      | 0.4926    | 0.3408      |
| 6   | A    | 86.5823    | 0.0423      | 0.1500    | 1.4119      |
| 7   | A    | 120.0406   | 0.0874      | 0.4534    | 0.4076      |
| 8   | A    | 121.9042   | 0.1406      | 1.5059    | 0.0788      |
| 9   | A    | 127.6662   | 0.1180      | 1.5491    | 0.2083      |
| 10  | A    | 135.1827   | 0.1006      | 3.9872    | 0.2451      |
| 11  | A    | 203.6036   | 0.4683      | 0.4551    | 1.6000      |
| 12  | A    | 204.1580   | 0.4793      | 0.2940    | 0.3749      |

|    |   |           |         |          |         |
|----|---|-----------|---------|----------|---------|
| 13 | A | 206.8880  | 0.2211  | 0.9732   | 0.1457  |
| 14 | A | 216.4706  | 0.2412  | 1.0866   | 0.5216  |
| 15 | A | 281.3083  | 0.5164  | 3.2897   | 0.1970  |
| 16 | A | 282.7778  | 0.5516  | 2.9075   | 0.2404  |
| 17 | A | 304.2293  | 0.2575  | 3.5016   | 0.5661  |
| 18 | A | 305.2121  | 0.2367  | 4.1676   | 0.5149  |
| 19 | A | 321.8426  | 0.5583  | 1.6442   | 1.0357  |
| 20 | A | 323.6097  | 0.6836  | 0.6910   | 1.4299  |
| 21 | A | 326.7252  | 0.5305  | 6.1677   | 0.4888  |
| 22 | A | 329.9519  | 0.5981  | 6.2969   | 0.7764  |
| 23 | A | 386.7603  | 0.1610  | 9.0529   | 1.2999  |
| 24 | A | 395.2168  | 0.2059  | 8.1917   | 1.5914  |
| 25 | A | 427.7711  | 1.7939  | 0.9565   | 2.0228  |
| 26 | A | 428.8156  | 1.7466  | 3.0971   | 3.1409  |
| 27 | A | 436.5071  | 0.2117  | 76.0552  | 1.0502  |
| 28 | A | 441.8390  | 0.2334  | 27.4705  | 2.1140  |
| 29 | A | 462.8573  | 1.2740  | 2.7106   | 0.4266  |
| 30 | A | 463.7548  | 1.3282  | 19.4675  | 5.4669  |
| 31 | A | 496.7637  | 0.2118  | 444.8280 | 2.0930  |
| 32 | A | 514.6900  | 0.2293  | 201.8668 | 0.7902  |
| 33 | A | 552.8745  | 1.2800  | 20.4508  | 35.6827 |
| 34 | A | 553.1667  | 1.3118  | 33.3652  | 2.2214  |
| 35 | A | 583.2830  | 1.8502  | 15.1863  | 1.3692  |
| 36 | A | 584.6617  | 2.2961  | 44.3290  | 0.2070  |
| 37 | A | 679.2917  | 1.5967  | 1.3027   | 0.4211  |
| 38 | A | 680.8140  | 1.5696  | 2.3455   | 0.4405  |
| 39 | A | 686.8485  | 3.1949  | 0.6484   | 0.7160  |
| 40 | A | 690.6313  | 3.2198  | 1.5748   | 0.5777  |
| 41 | A | 701.6132  | 3.1516  | 6.6931   | 3.3023  |
| 42 | A | 703.2382  | 3.2350  | 4.7009   | 3.7531  |
| 43 | A | 732.2733  | 3.8364  | 19.6696  | 0.8931  |
| 44 | A | 733.6862  | 3.8452  | 2.6364   | 0.6862  |
| 45 | A | 908.5424  | 5.0489  | 70.9515  | 6.0296  |
| 46 | A | 913.2406  | 5.0546  | 99.5841  | 1.0430  |
| 47 | A | 956.8736  | 4.4471  | 93.4665  | 0.3547  |
| 48 | A | 958.5710  | 4.5812  | 92.6915  | 0.2956  |
| 49 | A | 1113.0803 | 1.4068  | 26.2497  | 0.3834  |
| 50 | A | 1114.2554 | 1.4068  | 17.3363  | 1.9488  |
| 51 | A | 1162.1577 | 7.4092  | 6.9181   | 2.2608  |
| 52 | A | 1168.9165 | 7.7838  | 11.9711  | 8.4131  |
| 53 | A | 1256.3294 | 6.5178  | 39.6492  | 1.8460  |
| 54 | A | 1259.4554 | 6.5064  | 58.1453  | 0.9430  |
| 55 | A | 1334.1672 | 7.0407  | 16.4328  | 1.7233  |
| 56 | A | 1336.7785 | 6.9629  | 17.2743  | 2.4760  |
| 57 | A | 1436.6316 | 10.1336 | 117.4153 | 4.3725  |
| 58 | A | 1441.8919 | 9.8664  | 70.5490  | 5.5078  |
| 59 | A | 1477.8222 | 11.7197 | 42.1517  | 3.4201  |
| 60 | A | 1479.0386 | 12.7558 | 49.7470  | 4.8251  |
| 61 | A | 1508.0322 | 9.1787  | 372.0842 | 0.6109  |
| 62 | A | 1511.9632 | 8.4094  | 533.4018 | 0.2520  |

|    |   |           |         |          |          |
|----|---|-----------|---------|----------|----------|
| 63 | A | 1611.7531 | 12.4979 | 23.2329  | 3.3441   |
| 64 | A | 1613.7742 | 14.0554 | 42.7920  | 4.2245   |
| 65 | A | 1635.4924 | 2.4142  | 58.6209  | 0.3933   |
| 66 | A | 1636.7461 | 2.3333  | 53.4564  | 0.7808   |
| 67 | A | 1671.4086 | 7.9907  | 188.4539 | 7.8220   |
| 68 | A | 1675.7374 | 8.0134  | 225.8320 | 18.6509  |
| 69 | A | 3582.9652 | 7.9137  | 82.6958  | 95.3764  |
| 70 | A | 3585.9888 | 7.9262  | 70.8374  | 119.5573 |
| 71 | A | 3695.1754 | 8.8692  | 44.1438  | 23.7226  |
| 72 | A | 3698.0790 | 8.8823  | 49.9146  | 31.9387  |

05\_p3

| NM# | Symm | Wavenumber | Force Const | IR Intens | Raman Activ |
|-----|------|------------|-------------|-----------|-------------|
| 1   | A    | 9.0001     | 0.0006      | 0.7131    | 0.2310      |
| 2   | A    | 21.4159    | 0.0039      | 0.0172    | 3.0378      |
| 3   | A    | 35.6651    | 0.0107      | 0.1057    | 2.9940      |
| 4   | A    | 44.2657    | 0.0217      | 0.9431    | 0.1031      |
| 5   | A    | 55.3837    | 0.0198      | 1.5649    | 0.0311      |
| 6   | A    | 79.8126    | 0.0357      | 0.0446    | 2.5539      |
| 7   | A    | 120.2591   | 0.1158      | 0.0687    | 0.4950      |
| 8   | A    | 121.6985   | 0.1207      | 1.3610    | 0.0501      |
| 9   | A    | 127.9635   | 0.0973      | 1.4164    | 0.3934      |
| 10  | A    | 129.2609   | 0.1095      | 0.8556    | 0.2251      |
| 11  | A    | 203.5226   | 0.4596      | 0.6621    | 0.8536      |
| 12  | A    | 203.7983   | 0.4652      | 0.3136    | 1.2379      |
| 13  | A    | 207.6110   | 0.2217      | 0.8330    | 0.0783      |
| 14  | A    | 213.4674   | 0.1438      | 2.8727    | 0.8814      |
| 15  | A    | 250.1917   | 0.0530      | 114.5976  | 1.0329      |
| 16  | A    | 281.9318   | 0.5188      | 4.3748    | 0.2157      |
| 17  | A    | 283.0017   | 0.4761      | 5.6190    | 0.1396      |
| 18  | A    | 303.5186   | 0.2344      | 21.2117   | 0.5804      |
| 19  | A    | 306.0266   | 0.2519      | 3.7518    | 0.5807      |
| 20  | A    | 323.0305   | 0.6913      | 7.0336    | 0.9373      |
| 21  | A    | 323.3453   | 0.3598      | 35.5759   | 0.2100      |
| 22  | A    | 323.8110   | 0.4476      | 19.7698   | 1.9652      |
| 23  | A    | 329.9144   | 0.2660      | 30.4386   | 0.2881      |
| 24  | A    | 337.4347   | 0.1182      | 254.6877  | 0.2391      |
| 25  | A    | 398.1576   | 0.2253      | 0.2998    | 3.2819      |
| 26  | A    | 401.5931   | 0.2636      | 0.7521    | 0.7837      |
| 27  | A    | 428.6814   | 1.8609      | 0.6807    | 2.6625      |
| 28  | A    | 429.4116   | 1.8460      | 0.7271    | 2.3489      |
| 29  | A    | 452.7179   | 0.2261      | 5.4861    | 1.5402      |
| 30  | A    | 461.1062   | 0.2476      | 4.8073    | 1.6779      |
| 31  | A    | 465.8596   | 1.0775      | 3.4318    | 2.0527      |
| 32  | A    | 467.1112   | 0.5459      | 0.4832    | 3.5830      |
| 33  | A    | 552.3545   | 1.6662      | 2.4508    | 34.0548     |
| 34  | A    | 552.4861   | 1.6273      | 18.2510   | 2.8525      |

|    |   |           |         |          |          |
|----|---|-----------|---------|----------|----------|
| 35 | A | 582.0474  | 2.4473  | 4.8158   | 0.0830   |
| 36 | A | 584.2826  | 2.4622  | 16.2807  | 0.0339   |
| 37 | A | 676.2130  | 1.4858  | 0.4451   | 0.5299   |
| 38 | A | 677.4098  | 1.5056  | 0.5718   | 0.3003   |
| 39 | A | 689.0888  | 3.1764  | 2.7633   | 0.8568   |
| 40 | A | 691.1999  | 3.2025  | 1.3546   | 0.4287   |
| 41 | A | 700.3394  | 3.4607  | 5.5946   | 5.9461   |
| 42 | A | 700.8156  | 3.4892  | 10.2111  | 2.7926   |
| 43 | A | 732.5596  | 3.7463  | 6.3186   | 0.4776   |
| 44 | A | 734.6203  | 3.8288  | 8.9691   | 0.5348   |
| 45 | A | 909.6443  | 4.7567  | 31.1692  | 6.4303   |
| 46 | A | 913.4909  | 4.8135  | 171.4362 | 0.7072   |
| 47 | A | 955.3776  | 4.3954  | 20.0210  | 0.8412   |
| 48 | A | 959.3297  | 4.3617  | 154.3111 | 0.0615   |
| 49 | A | 1094.6530 | 1.3620  | 28.8120  | 1.1602   |
| 50 | A | 1099.5056 | 1.3683  | 28.4346  | 1.0860   |
| 51 | A | 1163.8730 | 7.6826  | 11.2149  | 3.4225   |
| 52 | A | 1167.5482 | 7.9480  | 3.4465   | 6.6984   |
| 53 | A | 1254.9712 | 6.8647  | 9.1065   | 2.5109   |
| 54 | A | 1257.8603 | 6.7057  | 99.0893  | 0.1693   |
| 55 | A | 1332.5983 | 7.6659  | 2.6871   | 4.5964   |
| 56 | A | 1336.0291 | 7.9695  | 29.2129  | 1.5800   |
| 57 | A | 1436.2733 | 9.8492  | 162.7032 | 1.4097   |
| 58 | A | 1442.9107 | 9.7847  | 19.5008  | 9.1741   |
| 59 | A | 1477.5140 | 12.6455 | 19.6090  | 8.3935   |
| 60 | A | 1479.4773 | 12.1330 | 91.3386  | 1.8784   |
| 61 | A | 1502.9604 | 8.1750  | 81.8356  | 2.0780   |
| 62 | A | 1516.0038 | 8.1582  | 811.5178 | 0.0938   |
| 63 | A | 1613.9001 | 14.2575 | 28.1743  | 3.2524   |
| 64 | A | 1615.2984 | 12.9786 | 38.0562  | 3.5739   |
| 65 | A | 1628.4596 | 2.3533  | 121.1950 | 0.7756   |
| 66 | A | 1629.7530 | 2.3076  | 48.3255  | 2.8309   |
| 67 | A | 1670.7807 | 9.1627  | 47.6536  | 20.7427  |
| 68 | A | 1674.9877 | 9.6798  | 389.7220 | 5.9802   |
| 69 | A | 3599.2208 | 7.9800  | 90.1127  | 128.8238 |
| 70 | A | 3604.8389 | 8.0034  | 96.1100  | 146.9844 |
| 71 | A | 3719.9233 | 9.0023  | 52.6011  | 35.2554  |
| 72 | A | 3728.4564 | 9.0495  | 58.3969  | 35.0336  |

05\_p4

| NM# | Symm | Wavenumber | Force Const | IR Intens | Raman Activ |
|-----|------|------------|-------------|-----------|-------------|
| 1   | A    | 20.0409    | 0.0030      | 0.5280    | 0.0000      |
| 2   | A    | 33.2115    | 0.0090      | 0.0000    | 3.6237      |
| 3   | A    | 43.9794    | 0.0155      | 0.0000    | 2.8599      |
| 4   | A    | 48.5004    | 0.0219      | 1.5998    | 0.0000      |
| 5   | A    | 65.8178    | 0.0294      | 1.2759    | 0.0000      |
| 6   | A    | 79.0508    | 0.0390      | 0.0000    | 1.4179      |

|    |   |           |        |          |         |
|----|---|-----------|--------|----------|---------|
| 7  | A | 118.6578  | 0.0886 | 2.9758   | 0.0000  |
| 8  | A | 122.4900  | 0.1039 | 0.0000   | 0.4640  |
| 9  | A | 129.5976  | 0.1318 | 1.7934   | 0.0000  |
| 10 | A | 131.6686  | 0.1238 | 0.0000   | 0.3787  |
| 11 | A | 203.7343  | 0.4680 | 0.9666   | 0.0000  |
| 12 | A | 204.6405  | 0.4836 | 0.0000   | 1.8404  |
| 13 | A | 206.8147  | 0.2232 | 1.6927   | 0.0000  |
| 14 | A | 215.8146  | 0.2409 | 0.0000   | 0.6570  |
| 15 | A | 281.9430  | 0.5177 | 6.3404   | 0.0000  |
| 16 | A | 281.9621  | 0.5306 | 0.0000   | 0.3734  |
| 17 | A | 304.2907  | 0.2488 | 8.5645   | 0.0000  |
| 18 | A | 304.9704  | 0.2455 | 0.0000   | 1.0392  |
| 19 | A | 322.8061  | 0.6274 | 0.0000   | 2.2291  |
| 20 | A | 323.3608  | 0.6038 | 1.9766   | 0.0000  |
| 21 | A | 327.2383  | 0.6682 | 0.0000   | 1.2965  |
| 22 | A | 330.8533  | 0.5659 | 11.3329  | 0.0000  |
| 23 | A | 389.0312  | 0.1989 | 0.0000   | 3.2897  |
| 24 | A | 395.7527  | 0.2088 | 23.5241  | 0.0000  |
| 25 | A | 427.3926  | 0.6337 | 84.3396  | 0.0000  |
| 26 | A | 427.5736  | 1.3728 | 0.0001   | 4.6581  |
| 27 | A | 430.6006  | 0.1894 | 272.2336 | 0.0000  |
| 28 | A | 441.6511  | 0.1863 | 0.0000   | 2.4176  |
| 29 | A | 457.6922  | 0.4056 | 145.6083 | 0.0000  |
| 30 | A | 461.3087  | 0.6517 | 0.0000   | 4.6447  |
| 31 | A | 473.1936  | 0.3280 | 301.0328 | 0.0000  |
| 32 | A | 477.9952  | 0.2351 | 0.0000   | 3.9822  |
| 33 | A | 552.5566  | 1.5399 | 35.1747  | 0.0000  |
| 34 | A | 553.0728  | 1.4655 | 0.0000   | 38.2207 |
| 35 | A | 581.5431  | 2.3166 | 0.0000   | 0.7017  |
| 36 | A | 581.8993  | 2.3616 | 37.2904  | 0.0000  |
| 37 | A | 679.2039  | 1.5760 | 0.0000   | 0.9534  |
| 38 | A | 679.3136  | 1.5607 | 1.8616   | 0.0000  |
| 39 | A | 689.2546  | 3.1861 | 3.4646   | 0.0000  |
| 40 | A | 689.7167  | 3.2656 | 0.0000   | 1.5523  |
| 41 | A | 700.6590  | 3.2520 | 0.0000   | 6.1998  |
| 42 | A | 701.1322  | 3.2626 | 12.2867  | 0.0000  |
| 43 | A | 733.6263  | 3.8644 | 20.3314  | 0.0000  |
| 44 | A | 734.5539  | 3.8689 | 0.0000   | 1.1637  |
| 45 | A | 910.4834  | 5.0048 | 0.0000   | 7.2062  |
| 46 | A | 912.5459  | 4.9078 | 200.1779 | 0.0000  |
| 47 | A | 953.2732  | 4.5918 | 0.0000   | 0.8913  |
| 48 | A | 959.9958  | 4.4961 | 152.5122 | 0.0000  |
| 49 | A | 1108.2882 | 1.3721 | 0.0000   | 2.4821  |
| 50 | A | 1111.3429 | 1.3996 | 41.5793  | 0.0000  |
| 51 | A | 1161.2475 | 7.8554 | 13.0611  | 0.0000  |
| 52 | A | 1167.9800 | 8.0723 | 0.0000   | 10.7235 |
| 53 | A | 1254.7078 | 6.5804 | 0.0000   | 2.8909  |
| 54 | A | 1258.3914 | 6.2808 | 108.7650 | 0.0000  |
| 55 | A | 1336.3905 | 7.3578 | 35.1091  | 0.0000  |
| 56 | A | 1338.0391 | 6.9965 | 0.0000   | 4.0790  |

|    |   |           |         |          |          |
|----|---|-----------|---------|----------|----------|
| 57 | A | 1437.0249 | 10.6057 | 184.0684 | 0.0000   |
| 58 | A | 1442.9729 | 10.2528 | 0.0000   | 11.2698  |
| 59 | A | 1478.5269 | 11.9265 | 0.0000   | 7.5362   |
| 60 | A | 1479.5843 | 11.0605 | 117.4654 | 0.0000   |
| 61 | A | 1502.0863 | 8.9364  | 0.0000   | 1.6560   |
| 62 | A | 1515.8156 | 8.4699  | 888.2821 | 0.0000   |
| 63 | A | 1614.0119 | 14.1546 | 73.4434  | 0.0000   |
| 64 | A | 1615.3548 | 13.3563 | 0.0000   | 6.3168   |
| 65 | A | 1631.8932 | 2.4146  | 0.0000   | 1.6019   |
| 66 | A | 1634.4303 | 2.3873  | 115.7403 | 0.0000   |
| 67 | A | 1671.1939 | 7.4917  | 0.0000   | 26.4053  |
| 68 | A | 1671.5407 | 8.1010  | 429.1364 | 0.0000   |
| 69 | A | 3588.8572 | 7.9373  | 0.4210   | 205.4252 |
| 70 | A | 3588.8693 | 7.9382  | 156.8671 | 0.5513   |
| 71 | A | 3703.4895 | 8.9134  | 0.0060   | 50.6797  |
| 72 | A | 3703.5951 | 8.9141  | 92.6243  | 0.0033   |

-----

06\_hb

| NM# | Symm | Wavenumber | Force Const | IR Intens | Raman Activ |
|-----|------|------------|-------------|-----------|-------------|
| 1   | A    | 6.1103     | 0.0004      | 0.1041    | 3.3875      |
| 2   | A    | 13.3058    | 0.0013      | 0.5400    | 1.5943      |
| 3   | A    | 13.7521    | 0.0017      | 0.0674    | 1.2487      |
| 4   | A    | 50.6141    | 0.0236      | 0.0495    | 0.7101      |
| 5   | A    | 70.0409    | 0.0415      | 0.8960    | 1.2377      |
| 6   | A    | 81.5081    | 0.0567      | 2.8431    | 0.0432      |
| 7   | A    | 120.8950   | 0.1596      | 0.0104    | 0.0052      |
| 8   | A    | 123.4893   | 0.1638      | 0.0668    | 0.0033      |
| 9   | A    | 159.3622   | 0.1918      | 0.3418    | 0.0250      |
| 10  | A    | 159.6305   | 0.2199      | 0.0412    | 0.0039      |
| 11  | A    | 213.0498   | 0.3827      | 3.9567    | 0.1815      |
| 12  | A    | 213.8157   | 0.3200      | 1.1654    | 0.2784      |
| 13  | A    | 277.5429   | 0.6889      | 3.8267    | 0.3516      |
| 14  | A    | 279.3787   | 0.4549      | 2.8981    | 0.4096      |
| 15  | A    | 281.4913   | 0.8205      | 2.9227    | 0.4678      |
| 16  | A    | 295.9949   | 0.7339      | 1.9083    | 0.6154      |
| 17  | A    | 318.6762   | 0.6224      | 3.1557    | 0.1074      |
| 18  | A    | 336.8309   | 0.6334      | 1.5130    | 1.1045      |
| 19  | A    | 346.4085   | 0.9625      | 2.1928    | 0.7601      |
| 20  | A    | 346.8890   | 1.1520      | 4.7577    | 0.7450      |
| 21  | A    | 352.0751   | 0.9873      | 0.6379    | 0.8774      |
| 22  | A    | 357.6738   | 0.7892      | 0.3492    | 0.1765      |
| 23  | A    | 419.0924   | 0.2902      | 42.0628   | 2.6015      |
| 24  | A    | 431.2060   | 1.3493      | 0.0405    | 2.5972      |
| 25  | A    | 450.3916   | 0.1939      | 84.2515   | 0.5395      |
| 26  | A    | 462.3661   | 1.9476      | 0.5004    | 4.4579      |
| 27  | A    | 464.5708   | 1.9805      | 0.4368    | 6.4726      |
| 28  | A    | 484.3080   | 1.9721      | 1.5744    | 5.7237      |



|    |   |           |         |           |          |
|----|---|-----------|---------|-----------|----------|
| 29 | A | 491.7756  | 2.0431  | 4.3091    | 5.7105   |
| 30 | A | 605.9186  | 2.9569  | 2.7991    | 8.2383   |
| 31 | A | 607.4689  | 2.9730  | 3.1136    | 34.7656  |
| 32 | A | 641.6377  | 2.7950  | 4.8262    | 0.6425   |
| 33 | A | 643.8221  | 2.8353  | 0.9037    | 0.5524   |
| 34 | A | 676.2722  | 3.2121  | 0.2211    | 0.1035   |
| 35 | A | 679.0256  | 3.2876  | 0.7596    | 0.0214   |
| 36 | A | 698.4989  | 4.3988  | 4.3675    | 14.6481  |
| 37 | A | 713.6634  | 3.3933  | 3.8175    | 2.3658   |
| 38 | A | 719.4406  | 3.2304  | 6.3341    | 17.3307  |
| 39 | A | 722.3826  | 1.6417  | 22.1322   | 1.7130   |
| 40 | A | 731.8916  | 2.4433  | 2.0112    | 0.1965   |
| 41 | A | 741.1517  | 3.4627  | 3.2652    | 0.1053   |
| 42 | A | 814.6499  | 0.4969  | 40.6796   | 0.1969   |
| 43 | A | 961.1172  | 3.7361  | 142.5088  | 0.6039   |
| 44 | A | 962.1868  | 4.6590  | 297.6147  | 0.3087   |
| 45 | A | 1106.2473 | 9.5555  | 456.9519  | 0.2098   |
| 46 | A | 1117.0613 | 9.7378  | 197.9950  | 0.3910   |
| 47 | A | 1141.6885 | 8.4439  | 3.5757    | 1.7912   |
| 48 | A | 1159.4078 | 6.3037  | 17.9454   | 1.4517   |
| 49 | A | 1271.5788 | 1.8844  | 106.4971  | 1.0756   |
| 50 | A | 1288.2718 | 5.6392  | 3.1643    | 1.0986   |
| 51 | A | 1303.0340 | 8.1897  | 119.3227  | 6.5595   |
| 52 | A | 1307.1168 | 3.1016  | 108.2758  | 3.4959   |
| 53 | A | 1371.9650 | 4.5047  | 40.4783   | 7.6497   |
| 54 | A | 1384.5380 | 2.9316  | 96.9584   | 17.6674  |
| 55 | A | 1434.4294 | 15.0284 | 25.0804   | 4.3231   |
| 56 | A | 1440.1189 | 12.1626 | 2.3023    | 8.4866   |
| 57 | A | 1499.6019 | 15.1502 | 717.4610  | 2.2384   |
| 58 | A | 1517.7059 | 16.0191 | 588.3961  | 3.2223   |
| 59 | A | 1546.4803 | 14.4211 | 210.3194  | 2.8000   |
| 60 | A | 1549.0128 | 13.1322 | 145.5649  | 1.9892   |
| 61 | A | 1651.7744 | 14.1353 | 58.1683   | 7.1047   |
| 62 | A | 1663.0667 | 13.9933 | 30.3615   | 5.3201   |
| 63 | A | 1666.5762 | 17.1755 | 213.2088  | 8.1115   |
| 64 | A | 1676.6636 | 19.5285 | 154.9034  | 11.8650  |
| 65 | A | 3415.7826 | 7.3654  | 1947.1672 | 600.5494 |
| 66 | A | 3785.0592 | 8.9996  | 158.2047  | 81.6718  |

06\_p1

| NM# | Symm | Wavenumber | Force Const | IR Intens | Raman Activ |
|-----|------|------------|-------------|-----------|-------------|
| 1   | AU   | 8.5624     | 0.0006      | 0.8965    | 0.0000      |
| 2   | AG   | 25.1868    | 0.0045      | 0.0000    | 3.2133      |
| 3   | AG   | 38.3899    | 0.0134      | 0.0000    | 2.1463      |
| 4   | AU   | 42.3863    | 0.0174      | 1.0958    | 0.0000      |
| 5   | AU   | 50.5317    | 0.0171      | 2.8300    | 0.0000      |
| 6   | AG   | 70.1279    | 0.0434      | 0.0000    | 0.8323      |

|    |    |           |         |          |         |
|----|----|-----------|---------|----------|---------|
| 7  | AU | 121.5406  | 0.1608  | 0.0515   | 0.0000  |
| 8  | AG | 125.5942  | 0.1686  | 0.0000   | 0.0458  |
| 9  | AU | 160.2789  | 0.1895  | 0.9977   | 0.0000  |
| 10 | AG | 161.0233  | 0.1827  | 0.0000   | 0.0962  |
| 11 | AU | 215.4598  | 0.3377  | 4.5378   | 0.0000  |
| 12 | AG | 223.2183  | 0.3449  | 0.0000   | 0.8986  |
| 13 | AU | 277.1313  | 0.7055  | 4.8881   | 0.0000  |
| 14 | AG | 277.7546  | 0.6807  | 0.0000   | 0.3570  |
| 15 | AG | 278.9423  | 0.4495  | 0.0000   | 0.4685  |
| 16 | AU | 279.0179  | 0.4355  | 6.0658   | 0.0000  |
| 17 | AU | 318.2634  | 0.6236  | 4.4952   | 0.0000  |
| 18 | AG | 319.3009  | 0.6263  | 0.0000   | 0.3225  |
| 19 | AG | 346.4894  | 1.1194  | 0.0000   | 0.5655  |
| 20 | AU | 346.8603  | 1.0996  | 4.1254   | 0.0000  |
| 21 | AG | 350.9051  | 0.7347  | 0.0000   | 0.9404  |
| 22 | AU | 352.5001  | 0.7487  | 0.0477   | 0.0000  |
| 23 | AG | 418.7443  | 0.1866  | 0.0000   | 4.5035  |
| 24 | AU | 424.1302  | 0.1953  | 157.6609 | 0.0000  |
| 25 | AU | 451.8653  | 0.2902  | 124.8564 | 0.0000  |
| 26 | AG | 454.6503  | 0.3009  | 0.0000   | 2.4378  |
| 27 | AU | 463.1092  | 1.7983  | 2.8472   | 0.0000  |
| 28 | AG | 463.4775  | 1.9629  | 0.0000   | 6.7902  |
| 29 | AU | 486.1665  | 1.9805  | 1.0180   | 0.0000  |
| 30 | AG | 486.7011  | 1.9807  | 0.0000   | 9.1155  |
| 31 | AU | 605.8358  | 2.9724  | 2.0484   | 0.0000  |
| 32 | AG | 606.1776  | 2.9702  | 0.0000   | 29.1729 |
| 33 | AG | 637.1173  | 2.7794  | 0.0000   | 0.7699  |
| 34 | AU | 638.4507  | 2.8305  | 11.6222  | 0.0000  |
| 35 | AU | 677.5341  | 3.2845  | 0.0485   | 0.0000  |
| 36 | AG | 677.8486  | 3.2613  | 0.0000   | 0.3627  |
| 37 | AG | 698.7411  | 4.3864  | 0.0000   | 16.7346 |
| 38 | AU | 698.9931  | 4.4119  | 6.4515   | 0.0000  |
| 39 | AU | 722.0538  | 3.6927  | 17.4410  | 0.0000  |
| 40 | AG | 722.1784  | 3.6991  | 0.0000   | 1.3417  |
| 41 | AG | 736.1690  | 3.1219  | 0.0000   | 0.3386  |
| 42 | AU | 736.2253  | 3.1042  | 9.8846   | 0.0000  |
| 43 | AG | 949.7677  | 3.8305  | 0.0000   | 0.5161  |
| 44 | AU | 956.4472  | 3.7071  | 350.3172 | 0.0000  |
| 45 | AG | 1098.3389 | 9.4235  | 0.0000   | 0.1376  |
| 46 | AU | 1109.1434 | 9.6256  | 424.1413 | 0.0000  |
| 47 | AU | 1139.1716 | 6.8701  | 51.8522  | 0.0000  |
| 48 | AG | 1147.8078 | 6.2331  | 0.0000   | 2.8339  |
| 49 | AU | 1271.5448 | 1.8791  | 175.9178 | 0.0000  |
| 50 | AG | 1272.9212 | 1.8740  | 0.0000   | 1.6869  |
| 51 | AU | 1294.4036 | 9.2339  | 82.7567  | 0.0000  |
| 52 | AG | 1295.0606 | 9.4023  | 0.0000   | 5.7494  |
| 53 | AU | 1374.6219 | 4.4915  | 67.1025  | 0.0000  |
| 54 | AG | 1375.3366 | 4.6899  | 0.0000   | 13.6720 |
| 55 | AU | 1435.7119 | 14.8994 | 45.4867  | 0.0000  |
| 56 | AG | 1436.7553 | 14.8422 | 0.0000   | 5.6131  |

|    |    |           |         |           |          |
|----|----|-----------|---------|-----------|----------|
| 57 | AG | 1498.4265 | 15.3394 | 0.0000    | 2.9664   |
| 58 | AU | 1509.1559 | 16.3651 | 1101.6670 | 0.0000   |
| 59 | AU | 1542.9380 | 14.4122 | 255.7161  | 0.0000   |
| 60 | AG | 1545.7329 | 14.5339 | 0.0000    | 3.8389   |
| 61 | AG | 1663.4920 | 19.5034 | 0.0000    | 9.9184   |
| 62 | AU | 1663.8397 | 15.0566 | 100.2788  | 0.0000   |
| 63 | AG | 1666.0674 | 13.8644 | 0.0000    | 4.1350   |
| 64 | AU | 1667.2955 | 17.3641 | 210.5580  | 0.0000   |
| 65 | AU | 3787.5734 | 9.0108  | 286.8439  | 0.0000   |
| 66 | AG | 3787.8878 | 9.0123  | 0.0000    | 123.0975 |

06\_p2

| NM# | Symm | Wavenumber | Force Const | IR Intens | Raman Activ |
|-----|------|------------|-------------|-----------|-------------|
| 1   | AU   | 4.4718     | 0.0002      | 0.9776    | 0.0000      |
| 2   | AG   | 21.1594    | 0.0038      | 0.0000    | 1.8106      |
| 3   | AG   | 29.3108    | 0.0070      | 0.0000    | 1.9754      |
| 4   | AU   | 31.7274    | 0.0092      | 0.0473    | 0.0000      |
| 5   | AU   | 43.2082    | 0.0141      | 2.4440    | 0.0000      |
| 6   | AG   | 77.3042    | 0.0453      | 0.0000    | 2.7432      |
| 7   | AG   | 125.0635   | 0.1700      | 0.0000    | 0.0496      |
| 8   | AU   | 125.8855   | 0.1730      | 0.0252    | 0.0000      |
| 9   | AU   | 163.6076   | 0.1926      | 0.6220    | 0.0000      |
| 10  | AG   | 164.8272   | 0.2054      | 0.0000    | 0.1098      |
| 11  | AU   | 217.1402   | 0.3749      | 8.2828    | 0.0000      |
| 12  | AG   | 218.5115   | 0.3251      | 0.0000    | 0.3368      |
| 13  | AG   | 276.4295   | 0.6390      | 0.0000    | 0.4574      |
| 14  | AU   | 276.9883   | 0.6348      | 6.0545    | 0.0000      |
| 15  | AU   | 279.5616   | 0.4816      | 3.8852    | 0.0000      |
| 16  | AG   | 280.5996   | 0.4738      | 0.0000    | 0.3385      |
| 17  | AG   | 318.4309   | 0.6197      | 0.0000    | 0.3374      |
| 18  | AU   | 318.9537   | 0.6252      | 4.0961    | 0.0000      |
| 19  | AU   | 345.7289   | 1.0618      | 4.3932    | 0.0000      |
| 20  | AG   | 346.9258   | 1.1218      | 0.0000    | 0.9677      |
| 21  | AU   | 350.5972   | 0.7745      | 0.2444    | 0.0000      |
| 22  | AG   | 350.9048   | 0.8557      | 0.0000    | 2.8712      |
| 23  | AG   | 420.0823   | 0.2214      | 0.0000    | 5.3984      |
| 24  | AU   | 429.4114   | 0.3424      | 81.6779   | 0.0000      |
| 25  | AU   | 450.9988   | 0.1843      | 215.8876  | 0.0000      |
| 26  | AG   | 459.3643   | 0.2482      | 0.0000    | 4.0228      |
| 27  | AG   | 463.6751   | 1.8856      | 0.0000    | 8.2501      |
| 28  | AU   | 463.7578   | 1.6781      | 4.9642    | 0.0000      |
| 29  | AU   | 486.4823   | 1.9656      | 1.3117    | 0.0000      |
| 30  | AG   | 486.8836   | 1.9043      | 0.0000    | 9.8972      |
| 31  | AG   | 605.6693   | 2.9406      | 0.0000    | 31.4435     |
| 32  | AU   | 605.6807   | 2.9613      | 1.9987    | 0.0000      |
| 33  | AG   | 640.2762   | 2.7577      | 0.0000    | 0.6869      |
| 34  | AU   | 641.8455   | 2.9006      | 10.2031   | 0.0000      |

|    |    |           |         |           |          |
|----|----|-----------|---------|-----------|----------|
| 35 | AU | 682.1826  | 3.3328  | 0.0882    | 0.0000   |
| 36 | AG | 682.7175  | 3.2822  | 0.0000    | 0.5125   |
| 37 | AU | 697.1631  | 4.3801  | 8.6576    | 0.0000   |
| 38 | AG | 697.5981  | 4.3916  | 0.0000    | 18.9503  |
| 39 | AU | 730.2188  | 3.7190  | 12.6405   | 0.0000   |
| 40 | AG | 731.6593  | 3.8048  | 0.0000    | 1.1451   |
| 41 | AG | 735.3392  | 3.0908  | 0.0000    | 0.4231   |
| 42 | AU | 736.0482  | 3.1191  | 9.1592    | 0.0000   |
| 43 | AG | 948.4601  | 3.7445  | 0.0000    | 0.6899   |
| 44 | AU | 954.0564  | 3.6951  | 356.9207  | 0.0000   |
| 45 | AG | 1096.9765 | 9.4565  | 0.0000    | 0.6325   |
| 46 | AU | 1106.1494 | 9.5699  | 473.6815  | 0.0000   |
| 47 | AU | 1139.6319 | 6.3929  | 57.0017   | 0.0000   |
| 48 | AG | 1144.3930 | 7.0854  | 0.0000    | 2.8703   |
| 49 | AG | 1267.6956 | 1.7023  | 0.0000    | 3.1099   |
| 50 | AU | 1271.8410 | 1.9618  | 147.3041  | 0.0000   |
| 51 | AG | 1288.3725 | 12.3570 | 0.0000    | 3.9916   |
| 52 | AU | 1288.8775 | 7.2972  | 119.4027  | 0.0000   |
| 53 | AU | 1371.7539 | 4.7435  | 61.9188   | 0.0000   |
| 54 | AG | 1373.9050 | 4.8265  | 0.0000    | 10.6252  |
| 55 | AU | 1437.6095 | 14.8110 | 49.4871   | 0.0000   |
| 56 | AG | 1438.5134 | 15.0729 | 0.0000    | 7.1602   |
| 57 | AG | 1500.3948 | 15.7388 | 0.0000    | 3.5103   |
| 58 | AU | 1507.7630 | 15.5510 | 1175.1806 | 0.0000   |
| 59 | AG | 1540.8815 | 14.0363 | 0.0000    | 4.0741   |
| 60 | AU | 1546.5097 | 14.6645 | 209.7339  | 0.0000   |
| 61 | AU | 1665.7175 | 15.9897 | 165.3433  | 0.0000   |
| 62 | AG | 1666.0789 | 19.5569 | 0.0000    | 12.6352  |
| 63 | AG | 1669.8241 | 14.0147 | 0.0000    | 7.0801   |
| 64 | AU | 1671.0554 | 16.9175 | 179.4486  | 0.0000   |
| 65 | AU | 3786.2167 | 9.0050  | 279.9388  | 0.0000   |
| 66 | AG | 3786.4738 | 9.0060  | 0.0000    | 106.9816 |

07\_hb

| NM# | Symm | Wavenumber | Force Const | IR Intens | Raman Activ |
|-----|------|------------|-------------|-----------|-------------|
| 1   | AU   | 12.3120    | 0.0015      | 0.0035    | 0.0000      |
| 2   | AU   | 23.6330    | 0.0031      | 0.6312    | 0.0000      |
| 3   | AU   | 62.6895    | 0.0297      | 4.1760    | 0.0000      |
| 4   | AG   | 64.1840    | 0.0304      | 0.0000    | 3.8498      |
| 5   | AG   | 84.5132    | 0.0620      | 0.0000    | 0.5207      |
| 6   | AG   | 118.3583   | 0.1228      | 0.0000    | 0.1313      |
| 7   | AU   | 119.2129   | 0.1316      | 0.0077    | 0.0000      |
| 8   | AG   | 120.9124   | 0.1054      | 0.0000    | 1.0881      |
| 9   | AG   | 200.4460   | 0.2839      | 0.0000    | 0.8752      |
| 10  | AU   | 203.3436   | 0.3163      | 7.8713    | 0.0000      |
| 11  | AG   | 286.8524   | 0.8369      | 0.0000    | 1.5329      |
| 12  | AU   | 287.2786   | 0.8475      | 4.4884    | 0.0000      |

|    |    |           |         |           |         |
|----|----|-----------|---------|-----------|---------|
| 13 | AU | 297.5865  | 0.4412  | 0.5181    | 0.0000  |
| 14 | AG | 297.7982  | 0.4045  | 0.0000    | 3.4189  |
| 15 | AU | 322.8518  | 0.8209  | 17.7485   | 0.0000  |
| 16 | AG | 328.0541  | 0.7472  | 0.0000    | 2.2411  |
| 17 | AG | 380.0895  | 0.8427  | 0.0000    | 3.1949  |
| 18 | AU | 386.7530  | 0.7627  | 8.7689    | 0.0000  |
| 19 | AG | 439.1368  | 1.3708  | 0.0000    | 5.1023  |
| 20 | AU | 440.4296  | 1.3994  | 0.0081    | 0.0000  |
| 21 | AG | 454.9111  | 1.4654  | 0.0000    | 7.8211  |
| 22 | AU | 459.1412  | 1.6081  | 0.9407    | 0.0000  |
| 23 | AU | 474.4091  | 0.5418  | 0.4620    | 0.0000  |
| 24 | AG | 478.2487  | 0.5853  | 0.0000    | 0.0109  |
| 25 | AU | 522.2173  | 2.0545  | 20.5641   | 0.0000  |
| 26 | AG | 522.9538  | 2.0082  | 0.0000    | 19.4507 |
| 27 | AG | 662.3923  | 1.3965  | 0.0000    | 3.8332  |
| 28 | AU | 677.9503  | 1.4584  | 14.6755   | 0.0000  |
| 29 | AG | 696.7354  | 2.8692  | 0.0000    | 1.1923  |
| 30 | AU | 697.9694  | 3.0997  | 2.5395    | 0.0000  |
| 31 | AG | 708.7740  | 4.2789  | 0.0000    | 2.4645  |
| 32 | AU | 719.1450  | 4.2238  | 10.8738   | 0.0000  |
| 33 | AG | 725.7071  | 2.2178  | 0.0000    | 0.8534  |
| 34 | AU | 734.1210  | 3.0350  | 14.8809   | 0.0000  |
| 35 | AU | 764.3731  | 3.1017  | 25.2463   | 0.0000  |
| 36 | AG | 770.3121  | 3.1717  | 0.0000    | 80.6651 |
| 37 | AG | 831.2057  | 0.4500  | 0.0000    | 0.1838  |
| 38 | AU | 879.6024  | 0.4842  | 156.0478  | 0.0000  |
| 39 | AU | 897.8098  | 0.6574  | 67.3587   | 0.0000  |
| 40 | AG | 898.4183  | 0.6533  | 0.0000    | 0.3508  |
| 41 | AG | 914.2122  | 2.2154  | 0.0000    | 0.4155  |
| 42 | AU | 927.1123  | 2.6802  | 207.7246  | 0.0000  |
| 43 | AU | 1157.4038 | 2.8327  | 98.4204   | 0.0000  |
| 44 | AG | 1157.4802 | 2.9137  | 0.0000    | 9.2160  |
| 45 | AG | 1209.8343 | 1.8921  | 0.0000    | 0.2653  |
| 46 | AU | 1214.7633 | 2.1060  | 126.5008  | 0.0000  |
| 47 | AU | 1227.1308 | 3.7842  | 559.2520  | 0.0000  |
| 48 | AG | 1241.0765 | 5.8067  | 0.0000    | 2.9788  |
| 49 | AG | 1290.3649 | 6.7474  | 0.0000    | 6.0113  |
| 50 | AU | 1294.8499 | 6.8583  | 201.5534  | 0.0000  |
| 51 | AG | 1403.5403 | 3.0711  | 0.0000    | 3.0307  |
| 52 | AU | 1416.9381 | 2.2272  | 80.3614   | 0.0000  |
| 53 | AU | 1428.9008 | 11.8158 | 148.7560  | 0.0000  |
| 54 | AG | 1430.4281 | 8.2083  | 0.0000    | 47.9989 |
| 55 | AG | 1460.0611 | 7.4201  | 0.0000    | 2.6173  |
| 56 | AU | 1473.5818 | 5.2384  | 96.9401   | 0.0000  |
| 57 | AU | 1544.0823 | 13.0903 | 1449.5829 | 0.0000  |
| 58 | AG | 1561.1511 | 4.8746  | 0.0000    | 10.8117 |
| 59 | AG | 1639.6518 | 9.5155  | 0.0000    | 23.6207 |
| 60 | AU | 1648.4064 | 9.4627  | 8.1772    | 0.0000  |
| 61 | AU | 1688.1052 | 14.6631 | 136.5554  | 0.0000  |
| 62 | AG | 1693.7123 | 12.5257 | 0.0000    | 12.4371 |

|    |    |           |        |           |           |
|----|----|-----------|--------|-----------|-----------|
| 63 | AG | 3186.3531 | 6.4286 | 0.0000    | 1027.5584 |
| 64 | AU | 3215.7263 | 6.6625 | 5.8035    | 0.0000    |
| 65 | AG | 3215.7744 | 6.6626 | 0.0000    | 219.1791  |
| 66 | AU | 3259.9145 | 6.7086 | 4623.5352 | 0.0000    |

07\_p1

| NM# | Symm | Wavenumber | Force Const | IR Intens | Raman Activ |
|-----|------|------------|-------------|-----------|-------------|
| 1   | A    | 22.2673    | 0.0037      | 0.0461    | 0.7219      |
| 2   | A    | 33.4242    | 0.0065      | 0.1161    | 0.5836      |
| 3   | A    | 38.7299    | 0.0124      | 0.0771    | 2.0231      |
| 4   | A    | 42.4604    | 0.0129      | 0.1184    | 1.1929      |
| 5   | A    | 52.0350    | 0.0178      | 0.2912    | 1.6332      |
| 6   | A    | 82.9516    | 0.0416      | 0.1183    | 1.6432      |
| 7   | A    | 120.4712   | 0.0898      | 0.4889    | 0.2230      |
| 8   | A    | 121.7614   | 0.1127      | 0.9218    | 0.1671      |
| 9   | A    | 206.1301   | 0.2563      | 1.3650    | 0.4023      |
| 10  | A    | 214.2722   | 0.2904      | 0.6946    | 0.1204      |
| 11  | A    | 282.8655   | 0.6573      | 2.4099    | 0.2888      |
| 12  | A    | 284.4757   | 0.7178      | 0.9867    | 0.6369      |
| 13  | A    | 303.1202   | 0.4356      | 3.0411    | 1.7164      |
| 14  | A    | 304.9261   | 0.4713      | 0.9369    | 0.8292      |
| 15  | A    | 305.9677   | 0.5818      | 1.1738    | 0.2437      |
| 16  | A    | 309.1148   | 0.5907      | 3.5664    | 0.3366      |
| 17  | A    | 354.2797   | 0.6610      | 6.8175    | 0.0992      |
| 18  | A    | 357.6461   | 0.6789      | 4.8008    | 0.1137      |
| 19  | A    | 422.3551   | 0.1638      | 127.8348  | 1.5223      |
| 20  | A    | 430.7155   | 0.2009      | 79.4544   | 1.1973      |
| 21  | A    | 455.0027   | 1.3858      | 1.3406    | 2.9049      |
| 22  | A    | 455.2442   | 1.3899      | 1.5383    | 3.4822      |
| 23  | A    | 463.1335   | 0.4840      | 53.8073   | 3.4484      |
| 24  | A    | 465.1554   | 0.5458      | 4.5276    | 0.8523      |
| 25  | A    | 487.6122   | 0.4938      | 54.6704   | 0.2280      |
| 26  | A    | 504.0378   | 0.3491      | 24.4755   | 2.2018      |
| 27  | A    | 518.2459   | 1.7973      | 7.9012    | 10.7301     |
| 28  | A    | 518.6549   | 1.6573      | 6.5541    | 7.2697      |
| 29  | A    | 651.9228   | 1.3304      | 21.2061   | 0.5508      |
| 30  | A    | 652.0884   | 1.3282      | 8.0527    | 1.4462      |
| 31  | A    | 695.3146   | 3.2450      | 3.1388    | 0.4875      |
| 32  | A    | 696.4474   | 4.2259      | 16.5849   | 1.3104      |
| 33  | A    | 696.6516   | 4.2226      | 12.5230   | 0.7476      |
| 34  | A    | 698.1115   | 3.3149      | 0.5676    | 0.2164      |
| 35  | A    | 733.1525   | 2.7977      | 2.8259    | 2.8043      |
| 36  | A    | 734.2739   | 2.8015      | 29.3350   | 0.9169      |
| 37  | A    | 760.2290   | 3.0480      | 14.6011   | 37.9192     |
| 38  | A    | 760.4480   | 3.0526      | 5.7993    | 2.7600      |
| 39  | A    | 898.0830   | 0.7107      | 25.2990   | 0.1339      |
| 40  | A    | 898.9198   | 0.7415      | 40.9735   | 0.2935      |

|    |   |           |         |          |         |
|----|---|-----------|---------|----------|---------|
| 41 | A | 902.5268  | 1.4410  | 33.4945  | 0.2592  |
| 42 | A | 903.5105  | 1.8367  | 79.6760  | 0.3509  |
| 43 | A | 1148.3472 | 4.0232  | 19.5985  | 1.5062  |
| 44 | A | 1151.9684 | 3.5220  | 12.8202  | 5.1894  |
| 45 | A | 1176.8991 | 1.9169  | 224.9192 | 1.6969  |
| 46 | A | 1180.8289 | 1.9474  | 291.9552 | 1.6366  |
| 47 | A | 1204.7749 | 1.7441  | 88.6235  | 0.2885  |
| 48 | A | 1206.5119 | 1.8751  | 44.5098  | 0.1877  |
| 49 | A | 1273.4351 | 3.8653  | 89.1495  | 1.6766  |
| 50 | A | 1278.5177 | 3.9812  | 191.7569 | 1.1746  |
| 51 | A | 1357.0280 | 3.6603  | 2.2271   | 0.3200  |
| 52 | A | 1362.7303 | 3.6475  | 13.3820  | 1.5488  |
| 53 | A | 1415.5567 | 13.1399 | 7.9261   | 1.8767  |
| 54 | A | 1421.3813 | 13.1692 | 14.6558  | 20.5293 |
| 55 | A | 1467.8274 | 10.0847 | 110.6934 | 0.4195  |
| 56 | A | 1470.1142 | 10.0307 | 50.5892  | 0.2000  |
| 57 | A | 1518.6645 | 9.5785  | 318.6226 | 2.0713  |
| 58 | A | 1528.3591 | 10.0172 | 804.3226 | 0.5452  |
| 59 | A | 1650.3198 | 11.8874 | 2.0743   | 3.4514  |
| 60 | A | 1652.7761 | 11.8135 | 1.4000   | 8.3071  |
| 61 | A | 1676.9264 | 15.3802 | 14.6299  | 3.3364  |
| 62 | A | 1678.6210 | 15.3693 | 33.7292  | 4.1820  |
| 63 | A | 3216.3534 | 6.6657  | 3.8140   | 73.4733 |
| 64 | A | 3219.7389 | 6.6800  | 3.8534   | 95.0542 |
| 65 | A | 3779.7121 | 8.9643  | 104.8061 | 62.8523 |
| 66 | A | 3785.0461 | 8.9899  | 110.5946 | 62.1153 |

07\_p2

| NM# | Symm | Wavenumber | Force Const | IR Intens | Raman Activ |
|-----|------|------------|-------------|-----------|-------------|
| 1   | AU   | 9.4658     | 0.0006      | 0.0833    | 0.0000      |
| 2   | AG   | 19.1902    | 0.0022      | 0.0000    | 4.1009      |
| 3   | AG   | 36.9791    | 0.0100      | 0.0000    | 2.5402      |
| 4   | AU   | 40.2424    | 0.0130      | 0.3910    | 0.0000      |
| 5   | AU   | 52.9205    | 0.0145      | 0.0252    | 0.0000      |
| 6   | AG   | 70.7853    | 0.0409      | 0.0000    | 0.9818      |
| 7   | AU   | 117.5399   | 0.1141      | 0.8320    | 0.0000      |
| 8   | AG   | 120.2183   | 0.1118      | 0.0000    | 0.1507      |
| 9   | AU   | 205.1680   | 0.2732      | 2.5002    | 0.0000      |
| 10  | AG   | 211.5758   | 0.2712      | 0.0000    | 1.4491      |
| 11  | AU   | 282.3082   | 0.6628      | 3.0302    | 0.0000      |
| 12  | AG   | 282.6712   | 0.6548      | 0.0000    | 1.0507      |
| 13  | AG   | 299.0818   | 0.4411      | 0.0000    | 2.2638      |
| 14  | AU   | 303.1975   | 0.4351      | 3.0828    | 0.0000      |
| 15  | AU   | 305.0587   | 0.6043      | 3.7488    | 0.0000      |
| 16  | AG   | 305.3489   | 0.6121      | 0.0000    | 0.2757      |
| 17  | AU   | 354.1194   | 0.6885      | 14.5034   | 0.0000      |
| 18  | AG   | 354.4536   | 0.6834      | 0.0000    | 0.1171      |

|    |    |           |         |           |          |
|----|----|-----------|---------|-----------|----------|
| 19 | AU | 422.7992  | 0.1889  | 134.1839  | 0.0000   |
| 20 | AG | 425.1832  | 0.1840  | 0.0000    | 2.4234   |
| 21 | AU | 454.6602  | 1.4146  | 2.6800    | 0.0000   |
| 22 | AG | 455.2849  | 1.4211  | 0.0000    | 6.2885   |
| 23 | AG | 462.4374  | 0.5033  | 0.0000    | 5.0990   |
| 24 | AU | 463.1606  | 0.4676  | 32.7401   | 0.0000   |
| 25 | AG | 493.7808  | 0.3682  | 0.0000    | 1.3010   |
| 26 | AU | 494.8021  | 0.3672  | 99.1683   | 0.0000   |
| 27 | AU | 517.8473  | 1.8473  | 11.8851   | 0.0000   |
| 28 | AG | 517.9106  | 1.8187  | 0.0000    | 19.3963  |
| 29 | AG | 650.8285  | 1.3230  | 0.0000    | 1.9864   |
| 30 | AU | 650.8476  | 1.3243  | 36.3004   | 0.0000   |
| 31 | AG | 694.3057  | 3.3736  | 0.0000    | 0.7238   |
| 32 | AU | 694.4376  | 3.2620  | 4.9335    | 0.0000   |
| 33 | AG | 695.3523  | 4.0689  | 0.0000    | 1.6982   |
| 34 | AU | 696.5860  | 4.2453  | 27.6921   | 0.0000   |
| 35 | AU | 730.7263  | 2.8763  | 28.9356   | 0.0000   |
| 36 | AG | 731.3011  | 2.9096  | 0.0000    | 1.6579   |
| 37 | AG | 760.0231  | 3.0550  | 0.0000    | 38.3529  |
| 38 | AU | 760.0490  | 3.0422  | 21.0129   | 0.0000   |
| 39 | AG | 893.8692  | 0.6544  | 0.0000    | 0.2983   |
| 40 | AU | 894.2321  | 0.6549  | 57.6342   | 0.0000   |
| 41 | AG | 899.1228  | 2.0006  | 0.0000    | 0.8565   |
| 42 | AU | 904.0431  | 1.9578  | 108.8960  | 0.0000   |
| 43 | AU | 1147.4957 | 4.3484  | 21.8421   | 0.0000   |
| 44 | AG | 1152.5790 | 3.1860  | 0.0000    | 7.2412   |
| 45 | AG | 1174.4759 | 2.0489  | 0.0000    | 1.4029   |
| 46 | AU | 1176.8470 | 1.8343  | 624.2241  | 0.0000   |
| 47 | AG | 1205.0055 | 1.8192  | 0.0000    | 0.5220   |
| 48 | AU | 1205.2348 | 1.6819  | 95.7369   | 0.0000   |
| 49 | AG | 1273.2374 | 3.8949  | 0.0000    | 3.0589   |
| 50 | AU | 1276.9076 | 4.4030  | 290.8159  | 0.0000   |
| 51 | AU | 1358.3216 | 3.6860  | 14.4783   | 0.0000   |
| 52 | AG | 1358.4834 | 3.8003  | 0.0000    | 1.8734   |
| 53 | AU | 1415.8203 | 13.0409 | 8.8867    | 0.0000   |
| 54 | AG | 1420.7149 | 12.7348 | 0.0000    | 20.7654  |
| 55 | AG | 1466.9708 | 10.0122 | 0.0000    | 0.5062   |
| 56 | AU | 1469.1134 | 10.3792 | 152.7982  | 0.0000   |
| 57 | AG | 1519.5045 | 9.7621  | 0.0000    | 2.9438   |
| 58 | AU | 1531.7124 | 10.2310 | 1198.8505 | 0.0000   |
| 59 | AU | 1650.4192 | 11.8082 | 3.2488    | 0.0000   |
| 60 | AG | 1652.2237 | 11.8993 | 0.0000    | 11.7555  |
| 61 | AU | 1676.7693 | 15.4447 | 58.4463   | 0.0000   |
| 62 | AG | 1679.5961 | 15.6119 | 0.0000    | 7.5262   |
| 63 | AU | 3219.5893 | 6.6790  | 7.6972    | 0.0000   |
| 64 | AG | 3219.6145 | 6.6792  | 0.0000    | 152.1648 |
| 65 | AU | 3791.7877 | 9.0217  | 230.4690  | 0.0000   |
| 66 | AG | 3791.9082 | 9.0223  | 0.0000    | 180.2150 |



07\_p3

| NM# | Symm | Wavenumber | Force Const | IR Intens | Raman Activ |
|-----|------|------------|-------------|-----------|-------------|
| 1   | A    | -10.8860   | 0.0009      | 0.1243    | 2.7971      |
| 2   | A    | 13.7733    | 0.0014      | 0.0080    | 0.1605      |
| 3   | A    | 36.8229    | 0.0111      | 0.0504    | 2.5859      |
| 4   | A    | 48.2963    | 0.0148      | 0.0189    | 1.3624      |
| 5   | A    | 50.0086    | 0.0144      | 0.0196    | 0.1341      |
| 6   | A    | 71.9288    | 0.0374      | 0.0173    | 1.0981      |
| 7   | A    | 118.5447   | 0.1089      | 0.3792    | 0.0014      |
| 8   | A    | 121.0463   | 0.1075      | 0.0263    | 0.2960      |
| 9   | A    | 206.7617   | 0.2699      | 3.0461    | 0.0595      |
| 10  | A    | 215.8422   | 0.2970      | 0.0422    | 0.3984      |
| 11  | A    | 282.8625   | 0.6590      | 0.1477    | 0.9298      |
| 12  | A    | 283.8136   | 0.6780      | 3.3480    | 0.0859      |
| 13  | A    | 300.3711   | 0.4447      | 2.5557    | 1.2152      |
| 14  | A    | 303.5128   | 0.4410      | 0.0521    | 1.6486      |
| 15  | A    | 305.8194   | 0.6104      | 1.4064    | 0.0772      |
| 16  | A    | 306.4019   | 0.6281      | 1.1063    | 0.1057      |
| 17  | A    | 354.7309   | 0.6858      | 13.0710   | 0.0540      |
| 18  | A    | 354.7845   | 0.6871      | 0.0301    | 0.1727      |
| 19  | A    | 433.8385   | 0.3226      | 73.6731   | 2.1925      |
| 20  | A    | 443.0254   | 0.3078      | 0.4952    | 1.1743      |
| 21  | A    | 455.2430   | 1.3976      | 2.5032    | 0.1007      |
| 22  | A    | 455.5997   | 1.3693      | 0.1749    | 6.0447      |
| 23  | A    | 467.9923   | 0.4133      | 0.0354    | 1.5202      |
| 24  | A    | 470.3189   | 0.4040      | 36.7100   | 0.4972      |
| 25  | A    | 503.0721   | 0.2762      | 0.9575    | 2.9182      |
| 26  | A    | 506.8888   | 0.2679      | 188.6787  | 0.1396      |
| 27  | A    | 517.6595   | 1.8319      | 0.7874    | 12.3254     |
| 28  | A    | 518.0260   | 1.6919      | 14.8027   | 5.6601      |
| 29  | A    | 650.6119   | 1.3277      | 22.8132   | 0.0115      |
| 30  | A    | 650.9268   | 1.3257      | 6.4030    | 1.9155      |
| 31  | A    | 694.0001   | 3.2667      | 5.0774    | 0.1474      |
| 32  | A    | 695.8226   | 4.2254      | 13.7577   | 1.7131      |
| 33  | A    | 696.2428   | 4.2342      | 13.5127   | 0.2742      |
| 34  | A    | 697.0393   | 3.3253      | 0.1840    | 0.6914      |
| 35  | A    | 727.9345   | 2.8795      | 28.7061   | 0.6729      |
| 36  | A    | 729.7933   | 2.8499      | 0.0836    | 0.5690      |
| 37  | A    | 760.1469   | 3.0393      | 16.3671   | 38.7463     |
| 38  | A    | 760.5868   | 3.0447      | 4.2976    | 0.4964      |
| 39  | A    | 893.5081   | 0.6736      | 6.5607    | 0.3245      |
| 40  | A    | 894.3158   | 0.6872      | 63.8774   | 0.1557      |
| 41  | A    | 900.4132   | 1.7467      | 38.2624   | 0.1401      |
| 42  | A    | 902.5479   | 1.8553      | 71.7116   | 0.4088      |
| 43  | A    | 1145.4805  | 4.0328      | 17.0317   | 0.0155      |
| 44  | A    | 1151.8629  | 3.0739      | 17.8876   | 7.6821      |
| 45  | A    | 1173.0656  | 2.0670      | 2.4261    | 1.7813      |
| 46  | A    | 1179.5695  | 1.8488      | 555.1123  | 0.1556      |

|    |   |           |         |          |          |
|----|---|-----------|---------|----------|----------|
| 47 | A | 1204.8349 | 1.7885  | 1.0967   | 0.0406   |
| 48 | A | 1208.8795 | 1.8029  | 95.3109  | 0.3371   |
| 49 | A | 1268.3452 | 3.8231  | 11.0760  | 0.3682   |
| 50 | A | 1277.9755 | 4.0684  | 251.7252 | 2.1161   |
| 51 | A | 1356.1882 | 3.9003  | 5.3313   | 0.0156   |
| 52 | A | 1358.2928 | 3.7932  | 3.9440   | 1.0997   |
| 53 | A | 1417.1360 | 13.0521 | 7.3902   | 2.1954   |
| 54 | A | 1421.2379 | 13.1990 | 13.5870  | 19.4315  |
| 55 | A | 1468.7773 | 10.6019 | 13.9939  | 0.3297   |
| 56 | A | 1470.3189 | 9.6907  | 118.9333 | 0.1759   |
| 57 | A | 1522.8425 | 9.4370  | 496.0298 | 2.3383   |
| 58 | A | 1525.1979 | 9.9249  | 657.5104 | 0.0584   |
| 59 | A | 1651.0087 | 12.1462 | 0.3543   | 0.0002   |
| 60 | A | 1654.7778 | 12.0184 | 0.2890   | 12.1385  |
| 61 | A | 1675.4860 | 15.4948 | 28.8867  | 6.4401   |
| 62 | A | 1676.3124 | 15.2469 | 23.2425  | 0.1682   |
| 63 | A | 3221.0685 | 6.6857  | 4.6237   | 60.1083  |
| 64 | A | 3221.0876 | 6.6859  | 4.6317   | 100.6611 |
| 65 | A | 3782.4018 | 8.9778  | 147.2071 | 18.2791  |
| 66 | A | 3782.5469 | 8.9781  | 67.2746  | 113.8156 |

---

**Table S1.** Topological properties computed at the ring Atom (ACP), Bond (BCP) and Ring Critical Points (RCP), *viz.* the total electron density ( $\rho$ ), the Lagrangian kinetic energy (G), the Hamiltonian kinetic energy (K), the potential energy (V), the energy density (H), the Laplacian of the total electron density ( $\Delta\rho$ ), the Electron Localisation Function (ELF), the Source Function (SF), the total Electrostatic Potential (EPS), the ellipticity of the total electron density ( $\epsilon$ ), and the eta index ( $\eta$ ).

|          |      | $\rho$    | G         | K          | V          | H          | $\Delta\rho$ | ELF       | SF         | EPS       | $\epsilon$ | $\eta$    |
|----------|------|-----------|-----------|------------|------------|------------|--------------|-----------|------------|-----------|------------|-----------|
| <b>0</b> | ACP1 | 1.195E+02 | 7.776E+00 | 1.360E+05  | -1.361E+05 | -1.360E+05 | -5.442E+05   | 1.000E+00 | 1.542E+04  | 6.984E+05 | 0.000010   | -1.000018 |
|          | ACP2 | 1.195E+02 | 7.914E+00 | 1.360E+05  | -1.360E+05 | -1.360E+05 | -5.441E+05   | 1.000E+00 | 1.800E+04  | 6.864E+05 | 0.000017   | -1.000021 |
|          | ACP3 | 1.196E+02 | 7.808E+00 | 1.361E+05  | -1.361E+05 | -1.361E+05 | -5.444E+05   | 1.000E+00 | 2.043E+04  | 6.635E+05 | 0.000011   | -1.000022 |
|          | ACP4 | 1.195E+02 | 7.914E+00 | 1.360E+05  | -1.360E+05 | -1.360E+05 | -5.441E+05   | 1.000E+00 | 1.800E+04  | 6.864E+05 | 0.000017   | -1.000021 |
|          | ACP5 | 1.195E+02 | 7.776E+00 | 1.360E+05  | -1.361E+05 | -1.360E+05 | -5.442E+05   | 1.000E+00 | 1.542E+04  | 6.984E+05 | 0.000010   | -1.000018 |
|          | ACP6 | 4.266E+02 | 1.682E+02 | 1.155E+06  | -1.155E+06 | -1.155E+06 | -4.620E+06   | 1.000E+00 | 6.926E+04  | 1.213E+06 | 0.000039   | -1.000045 |
|          | BCP1 | 3.602E-01 | 2.677E-01 | 5.309E-01  | -7.986E-01 | -5.309E-01 | -1.053E+00   | 7.928E-01 | 3.176E-02  | 1.662E+00 | 0.251966   | 1.843804  |
|          | BCP2 | 3.182E-01 | 1.038E-01 | 3.302E-01  | -4.340E-01 | -3.302E-01 | -9.055E-01   | 9.439E-01 | 3.136E-02  | 9.950E-01 | 0.382206   | 2.151574  |
|          | BCP3 | 3.172E-01 | 1.012E-01 | 3.284E-01  | -4.295E-01 | -3.284E-01 | -9.089E-01   | 9.460E-01 | 3.836E-02  | 9.946E-01 | 0.375144   | 2.161915  |
|          | BCP4 | 3.172E-01 | 1.012E-01 | 3.284E-01  | -4.295E-01 | -3.284E-01 | -9.089E-01   | 9.460E-01 | 3.836E-02  | 9.946E-01 | 0.375144   | 2.161915  |
|          | BCP5 | 3.182E-01 | 1.038E-01 | 3.302E-01  | -4.340E-01 | -3.302E-01 | -9.055E-01   | 9.439E-01 | 3.136E-02  | 9.950E-01 | 0.382206   | 2.151574  |
|          | BCP6 | 3.602E-01 | 2.677E-01 | 5.309E-01  | -7.986E-01 | -5.309E-01 | -1.053E+00   | 7.928E-01 | 3.176E-02  | 1.662E+00 | 0.251966   | 1.843804  |
|          | RCP  | 2.311E-02 | 3.325E-02 | -7.856E-03 | -2.539E-02 | 7.856E-03  | 1.644E-01    | 2.553E-02 | -3.295E-02 | 2.971E-01 | -1.197354  | 0.183200  |
| <b>1</b> | ACP1 | 1.195E+02 | 7.767E+00 | 1.361E+05  | -1.361E+05 | -1.361E+05 | -5.442E+05   | 1.000E+00 | 1.531E+04  | 6.732E+05 | 0.000010   | -1.000018 |
|          | ACP2 | 1.195E+02 | 7.934E+00 | 1.360E+05  | -1.360E+05 | -1.360E+05 | -5.441E+05   | 1.000E+00 | 1.835E+04  | 6.539E+05 | 0.000022   | -1.000023 |
|          | ACP3 | 1.195E+02 | 7.980E+00 | 1.361E+05  | -1.361E+05 | -1.361E+05 | -5.443E+05   | 1.000E+00 | 2.016E+04  | 1.720E+06 | 0.000007   | -1.000014 |
|          | ACP4 | 1.195E+02 | 7.934E+00 | 1.360E+05  | -1.360E+05 | -1.360E+05 | -5.441E+05   | 1.000E+00 | 1.835E+04  | 6.539E+05 | 0.000022   | -1.000023 |
|          | ACP5 | 1.195E+02 | 7.767E+00 | 1.361E+05  | -1.361E+05 | -1.361E+05 | -5.442E+05   | 1.000E+00 | 1.531E+04  | 6.732E+05 | 0.000010   | -1.000018 |
|          | ACP6 | 1.943E+02 | 2.576E+01 | 3.034E+05  | -3.034E+05 | -3.034E+05 | -1.213E+06   | 1.000E+00 | 3.059E+04  | 6.179E+05 | 0.000004   | -1.000029 |
|          | BCP1 | 3.593E-01 | 2.541E-01 | 5.231E-01  | -7.771E-01 | -5.231E-01 | -1.076E+00   | 8.082E-01 | 3.193E-02  | 1.598E+00 | 0.244623   | 1.946738  |
|          | BCP2 | 3.215E-01 | 1.082E-01 | 3.374E-01  | -4.456E-01 | -3.374E-01 | -9.169E-01   | 9.413E-01 | 3.186E-02  | 9.862E-01 | 0.420470   | 2.230390  |
|          | BCP3 | 3.091E-01 | 9.656E-02 | 3.125E-01  | -4.091E-01 | -3.125E-01 | -8.638E-01   | 9.464E-01 | 3.702E-02  | 9.462E-01 | 0.305632   | 2.028859  |
|          | BCP4 | 3.091E-01 | 9.656E-02 | 3.125E-01  | -4.091E-01 | -3.125E-01 | -8.638E-01   | 9.464E-01 | 3.702E-02  | 9.462E-01 | 0.305632   | 2.028859  |
|          | BCP5 | 3.215E-01 | 1.082E-01 | 3.374E-01  | -4.456E-01 | -3.374E-01 | -9.169E-01   | 9.413E-01 | 3.186E-02  | 9.862E-01 | 0.420470   | 2.230390  |
|          | BCP6 | 3.593E-01 | 2.541E-01 | 5.231E-01  | -7.771E-01 | -5.231E-01 | -1.076E+00   | 8.082E-01 | 3.193E-02  | 1.598E+00 | 0.244623   | 1.946738  |

|          |      |           |           |            |            |            |            |           |            |           |           |           |
|----------|------|-----------|-----------|------------|------------|------------|------------|-----------|------------|-----------|-----------|-----------|
|          | RCP  | 2.337E-02 | 3.353E-02 | -7.750E-03 | -2.578E-02 | 7.750E-03  | 1.651E-01  | 2.606E-02 | -2.935E-02 | 2.669E-01 | -1.190110 | 0.189768  |
| <b>2</b> | ACP1 | 1.195E+02 | 7.717E+00 | 1.361E+05  | -1.361E+05 | -1.361E+05 | -5.443E+05 | 1.000E+00 | 1.643E+04  | 6.683E+05 | 0.000009  | -1.000018 |
|          | ACP2 | 1.195E+02 | 7.935E+00 | 1.360E+05  | -1.360E+05 | -1.360E+05 | -5.441E+05 | 1.000E+00 | 2.374E+04  | 9.368E+05 | 0.000017  | -1.000018 |
|          | ACP3 | 1.196E+02 | 7.933E+00 | 1.361E+05  | -1.361E+05 | -1.361E+05 | -5.444E+05 | 1.000E+00 | 2.185E+04  | 1.734E+06 | 0.000008  | -1.000014 |
|          | ACP4 | 1.195E+02 | 7.947E+00 | 1.360E+05  | -1.360E+05 | -1.360E+05 | -5.441E+05 | 1.000E+00 | 1.544E+04  | 6.515E+05 | 0.000022  | -1.000023 |
|          | ACP5 | 1.195E+02 | 7.762E+00 | 1.361E+05  | -1.361E+05 | -1.361E+05 | -5.442E+05 | 1.000E+00 | 1.281E+04  | 6.655E+05 | 0.000010  | -1.000018 |
|          | ACP6 | 1.943E+02 | 2.576E+01 | 3.034E+05  | -3.034E+05 | -3.034E+05 | -1.213E+06 | 1.000E+00 | 2.811E+04  | 6.148E+05 | 0.000005  | -1.000029 |
|          | BCP1 | 3.604E-01 | 2.547E-01 | 5.256E-01  | -7.803E-01 | -5.256E-01 | -1.084E+00 | 8.089E-01 | 3.205E-02  | 1.600E+00 | 0.237567  | 1.947979  |
|          | BCP2 | 3.147E-01 | 1.075E-01 | 3.252E-01  | -4.327E-01 | -3.252E-01 | -8.706E-01 | 9.379E-01 | 3.708E-02  | 9.732E-01 | 0.369573  | 2.111912  |
|          | BCP3 | 3.006E-01 | 9.514E-02 | 2.973E-01  | -3.924E-01 | -2.973E-01 | -8.085E-01 | 9.431E-01 | 4.636E-02  | 9.300E-01 | 0.266793  | 1.907108  |
|          | BCP4 | 2.513E-01 | 3.720E-01 | 3.293E-01  | -7.013E-01 | -3.293E-01 | 1.709E-01  | 3.736E-01 | -3.756E-03 | 1.974E+00 | 0.094155  | 0.438130  |
|          | BCP5 | 3.233E-01 | 1.095E-01 | 3.414E-01  | -4.510E-01 | -3.414E-01 | -9.276E-01 | 9.409E-01 | 2.586E-02  | 9.920E-01 | 0.423670  | 2.261854  |
|          | BCP6 | 3.594E-01 | 2.473E-01 | 5.203E-01  | -7.676E-01 | -5.203E-01 | -1.092E+00 | 8.165E-01 | 2.748E-02  | 1.579E+00 | 0.231845  | 1.991470  |
|          | RCP  | 2.352E-02 | 3.366E-02 | -7.715E-03 | -2.595E-02 | 7.715E-03  | 1.655E-01  | 2.637E-02 | -1.523E-02 | 2.600E-01 | -1.196144 | 0.191973  |
| <b>3</b> | ACP1 | 1.195E+02 | 7.713E+00 | 1.361E+05  | -1.361E+05 | -1.361E+05 | -5.443E+05 | 1.000E+00 | 1.388E+04  | 6.601E+05 | 0.000008  | -1.000019 |
|          | ACP2 | 1.195E+02 | 7.945E+00 | 1.360E+05  | -1.360E+05 | -1.360E+05 | -5.441E+05 | 1.000E+00 | 1.891E+04  | 9.333E+05 | 0.000017  | -1.000019 |
|          | ACP3 | 1.196E+02 | 7.881E+00 | 1.361E+05  | -1.361E+05 | -1.361E+05 | -5.444E+05 | 1.000E+00 | 2.513E+04  | 1.767E+06 | 0.000009  | -1.000015 |
|          | ACP4 | 1.195E+02 | 7.945E+00 | 1.360E+05  | -1.360E+05 | -1.360E+05 | -5.441E+05 | 1.000E+00 | 1.891E+04  | 9.333E+05 | 0.000017  | -1.000019 |
|          | ACP5 | 1.195E+02 | 7.713E+00 | 1.361E+05  | -1.361E+05 | -1.361E+05 | -5.443E+05 | 1.000E+00 | 1.388E+04  | 6.601E+05 | 0.000008  | -1.000019 |
|          | ACP6 | 1.943E+02 | 2.576E+01 | 3.034E+05  | -3.034E+05 | -3.034E+05 | -1.213E+06 | 1.000E+00 | 2.689E+04  | 6.118E+05 | 0.000005  | -1.000029 |
|          | BCP1 | 3.606E-01 | 2.484E-01 | 5.233E-01  | -7.717E-01 | -5.233E-01 | -1.100E+00 | 8.168E-01 | 2.859E-02  | 1.583E+00 | 0.224951  | 1.990031  |
|          | BCP2 | 3.165E-01 | 1.090E-01 | 3.292E-01  | -4.382E-01 | -3.292E-01 | -8.811E-01 | 9.375E-01 | 2.894E-02  | 9.795E-01 | 0.372734  | 2.142376  |
|          | BCP3 | 2.992E-01 | 9.407E-02 | 2.943E-01  | -3.883E-01 | -2.943E-01 | -8.008E-01 | 9.434E-01 | 4.092E-02  | 9.235E-01 | 0.262579  | 1.883518  |
|          | BCP4 | 2.992E-01 | 9.407E-02 | 2.943E-01  | -3.883E-01 | -2.943E-01 | -8.008E-01 | 9.434E-01 | 4.092E-02  | 9.235E-01 | 0.262579  | 1.883518  |
|          | BCP5 | 3.165E-01 | 1.090E-01 | 3.292E-01  | -4.382E-01 | -3.292E-01 | -8.811E-01 | 9.375E-01 | 2.894E-02  | 9.795E-01 | 0.372734  | 2.142376  |
|          | BCP6 | 3.606E-01 | 2.484E-01 | 5.233E-01  | -7.717E-01 | -5.233E-01 | -1.100E+00 | 8.168E-01 | 2.859E-02  | 1.583E+00 | 0.224951  | 1.990031  |
|          | RCP  | 2.363E-02 | 3.375E-02 | -7.664E-03 | -2.609E-02 | 7.664E-03  | 1.657E-01  | 2.666E-02 | -1.498E-02 | 2.531E-01 | -1.202658 | 0.194047  |
| <b>4</b> | ACP1 | 1.195E+02 | 7.776E+00 | 1.361E+05  | -1.361E+05 | -1.361E+05 | -5.442E+05 | 1.000E+00 | 1.724E+04  | 6.525E+05 | 0.000011  | -1.000019 |
|          | ACP2 | 1.195E+02 | 7.880E+00 | 1.360E+05  | -1.361E+05 | -1.360E+05 | -5.441E+05 | 1.000E+00 | 1.635E+04  | 6.445E+05 | 0.000018  | -1.000023 |
|          | ACP3 | 1.196E+02 | 8.137E+00 | 1.361E+05  | -1.361E+05 | -1.361E+05 | -5.445E+05 | 1.000E+00 | 1.614E+04  | 2.130E+07 | 0.000011  | -1.000013 |
|          | ACP4 | 1.195E+02 | 7.846E+00 | 1.361E+05  | -1.361E+05 | -1.361E+05 | -5.443E+05 | 1.000E+00 | 1.697E+04  | 6.133E+05 | 0.000019  | -1.000024 |

|          |      |           |           |            |            |            |            |           |            |           |           |           |
|----------|------|-----------|-----------|------------|------------|------------|------------|-----------|------------|-----------|-----------|-----------|
|          | ACP5 | 1.195E+02 | 7.895E+00 | 1.361E+05  | -1.361E+05 | -1.361E+05 | -5.442E+05 | 1.000E+00 | 1.708E+04  | 1.766E+06 | 0.000005  | -1.000010 |
|          | ACP6 | 1.943E+02 | 2.573E+01 | 3.033E+05  | -3.034E+05 | -3.033E+05 | -1.213E+06 | 1.000E+00 | 3.769E+04  | 6.199E+05 | 0.000003  | -1.000030 |
|          | BCP1 | 3.626E-01 | 2.620E-01 | 5.321E-01  | -7.941E-01 | -5.321E-01 | -1.080E+00 | 8.032E-01 | 3.893E-02  | 1.606E+00 | 0.254322  | 1.909218  |
|          | BCP2 | 3.192E-01 | 1.048E-01 | 3.326E-01  | -4.374E-01 | -3.326E-01 | -9.114E-01 | 9.435E-01 | 3.193E-02  | 9.618E-01 | 0.386780  | 2.174213  |
|          | BCP3 | 3.133E-01 | 1.039E-01 | 3.249E-01  | -4.288E-01 | -3.249E-01 | -8.842E-01 | 9.411E-01 | 3.006E-02  | 9.509E-01 | 0.277156  | 2.111323  |
|          | BCP4 | 3.194E-01 | 1.101E-01 | 3.382E-01  | -4.483E-01 | -3.382E-01 | -9.123E-01 | 9.380E-01 | 3.167E-02  | 9.763E-01 | 0.300139  | 2.221402  |
|          | BCP5 | 3.107E-01 | 9.639E-02 | 3.142E-01  | -4.106E-01 | -3.142E-01 | -8.712E-01 | 9.474E-01 | 3.144E-02  | 9.264E-01 | 0.308093  | 2.011520  |
|          | BCP6 | 3.396E-01 | 2.284E-01 | 4.769E-01  | -7.054E-01 | -4.769E-01 | -9.941E-01 | 8.119E-01 | 3.589E-02  | 1.511E+00 | 0.154080  | 1.906473  |
|          | RCP  | 2.370E-02 | 3.394E-02 | -7.862E-03 | -2.608E-02 | 7.862E-03  | 1.672E-01  | 2.663E-02 | -1.423E-01 | 2.415E-01 | -1.218632 | 0.189928  |
| <b>5</b> | ACP1 | 1.195E+02 | 7.774E+00 | 1.361E+05  | -1.361E+05 | -1.361E+05 | -5.442E+05 | 1.000E+00 | 1.360E+04  | 6.661E+05 | 0.000010  | -1.000019 |
|          | ACP2 | 1.195E+02 | 7.921E+00 | 1.360E+05  | -1.360E+05 | -1.360E+05 | -5.440E+05 | 1.000E+00 | 1.870E+04  | 6.714E+05 | 0.000019  | -1.000021 |
|          | ACP3 | 1.196E+02 | 7.816E+00 | 1.361E+05  | -1.361E+05 | -1.361E+05 | -5.445E+05 | 1.000E+00 | 2.684E+04  | 9.201E+05 | 0.000007  | -1.000017 |
|          | ACP4 | 1.195E+02 | 7.893E+00 | 1.360E+05  | -1.361E+05 | -1.360E+05 | -5.442E+05 | 1.000E+00 | 1.950E+04  | 6.386E+05 | 0.000020  | -1.000023 |
|          | ACP5 | 1.195E+02 | 7.892E+00 | 1.361E+05  | -1.361E+05 | -1.361E+05 | -5.442E+05 | 1.000E+00 | 1.343E+04  | 1.915E+06 | 0.000005  | -1.000010 |
|          | ACP6 | 1.943E+02 | 2.573E+01 | 3.033E+05  | -3.034E+05 | -3.033E+05 | -1.213E+06 | 1.000E+00 | 2.657E+04  | 6.132E+05 | 0.000004  | -1.000030 |
|          | BCP1 | 3.639E-01 | 2.603E-01 | 5.334E-01  | -7.937E-01 | -5.334E-01 | -1.092E+00 | 8.071E-01 | 2.788E-02  | 1.608E+00 | 0.250602  | 1.932790  |
|          | BCP2 | 3.190E-01 | 1.058E-01 | 3.324E-01  | -4.383E-01 | -3.324E-01 | -9.064E-01 | 9.423E-01 | 2.898E-02  | 9.733E-01 | 0.395247  | 2.175890  |
|          | BCP3 | 3.099E-01 | 1.002E-01 | 3.148E-01  | -4.150E-01 | -3.148E-01 | -8.582E-01 | 9.429E-01 | 4.455E-02  | 9.541E-01 | 0.329237  | 2.040988  |
|          | BCP4 | 3.158E-01 | 1.058E-01 | 3.271E-01  | -4.328E-01 | -3.271E-01 | -8.852E-01 | 9.405E-01 | 4.802E-02  | 9.769E-01 | 0.357135  | 2.139718  |
|          | BCP5 | 3.105E-01 | 9.771E-02 | 3.144E-01  | -4.121E-01 | -3.144E-01 | -8.669E-01 | 9.459E-01 | 2.802E-02  | 9.397E-01 | 0.315128  | 2.017687  |
|          | BCP6 | 3.399E-01 | 2.239E-01 | 4.752E-01  | -6.991E-01 | -4.752E-01 | -1.005E+00 | 8.184E-01 | 2.556E-02  | 1.504E+00 | 0.150948  | 1.938668  |
|          | RCP  | 2.313E-02 | 3.314E-02 | -7.710E-03 | -2.543E-02 | 7.710E-03  | 1.634E-01  | 2.577E-02 | -1.362E-02 | 2.567E-01 | -1.206140 | 0.186895  |
| <b>6</b> | ACP1 | 1.195E+02 | 7.777E+00 | 1.360E+05  | -1.361E+05 | -1.360E+05 | -5.441E+05 | 1.000E+00 | 1.537E+04  | 6.868E+05 | 0.000010  | -1.000018 |
|          | ACP2 | 1.195E+02 | 7.937E+00 | 1.360E+05  | -1.360E+05 | -1.360E+05 | -5.441E+05 | 1.000E+00 | 1.839E+04  | 6.410E+05 | 0.000021  | -1.000023 |
|          | ACP3 | 1.196E+02 | 7.897E+00 | 1.361E+05  | -1.361E+05 | -1.361E+05 | -5.444E+05 | 1.000E+00 | 2.021E+04  | 9.967E+05 | 0.000001  | -1.000014 |
|          | ACP4 | 1.195E+02 | 7.918E+00 | 1.360E+05  | -1.360E+05 | -1.360E+05 | -5.441E+05 | 1.000E+00 | 1.802E+04  | 6.904E+05 | 0.000018  | -1.000021 |
|          | ACP5 | 1.195E+02 | 7.766E+00 | 1.361E+05  | -1.361E+05 | -1.361E+05 | -5.442E+05 | 1.000E+00 | 1.537E+04  | 6.843E+05 | 0.000010  | -1.000018 |
|          | ACP6 | 1.943E+02 | 2.575E+01 | 3.034E+05  | -3.034E+05 | -3.034E+05 | -1.213E+06 | 1.000E+00 | 3.094E+04  | 6.183E+05 | 0.000003  | -1.000029 |
|          | BCP1 | 3.607E-01 | 2.618E-01 | 5.290E-01  | -7.908E-01 | -5.290E-01 | -1.069E+00 | 8.007E-01 | 3.198E-02  | 1.632E+00 | 0.249345  | 1.898758  |
|          | BCP2 | 3.205E-01 | 1.068E-01 | 3.353E-01  | -4.421E-01 | -3.353E-01 | -9.141E-01 | 9.421E-01 | 3.186E-02  | 9.975E-01 | 0.403447  | 2.205778  |
|          | BCP3 | 3.134E-01 | 1.002E-01 | 3.209E-01  | -4.211E-01 | -3.209E-01 | -8.826E-01 | 9.449E-01 | 3.784E-02  | 9.711E-01 | 0.337475  | 2.083242  |

|   |      |           |           |            |            |            |            |           |            |           |           |           |
|---|------|-----------|-----------|------------|------------|------------|------------|-----------|------------|-----------|-----------|-----------|
|   | BCP4 | 3.135E-01 | 9.768E-02 | 3.206E-01  | -4.182E-01 | -3.206E-01 | -8.916E-01 | 9.476E-01 | 3.755E-02  | 9.667E-01 | 0.339070  | 2.096501  |
|   | BCP5 | 3.193E-01 | 1.053E-01 | 3.327E-01  | -4.379E-01 | -3.327E-01 | -9.095E-01 | 9.430E-01 | 3.146E-02  | 9.856E-01 | 0.398485  | 2.180733  |
|   | BCP6 | 3.590E-01 | 2.599E-01 | 5.254E-01  | -7.854E-01 | -5.254E-01 | -1.062E+00 | 8.005E-01 | 3.178E-02  | 1.629E+00 | 0.247084  | 1.893503  |
|   | RCP  | 2.325E-02 | 3.340E-02 | -7.784E-03 | -2.562E-02 | 7.784E-03  | 1.647E-01  | 2.581E-02 | -3.116E-02 | 2.817E-01 | -1.194561 | 0.185736  |
| 7 | ACP1 | 1.195E+02 | 7.785E+00 | 1.361E+05  | -1.361E+05 | -1.361E+05 | -5.442E+05 | 1.000E+00 | 1.734E+04  | 6.616E+05 | 0.000011  | -1.000019 |
|   | ACP2 | 1.195E+02 | 7.861E+00 | 1.361E+05  | -1.361E+05 | -1.361E+05 | -5.442E+05 | 1.000E+00 | 1.655E+04  | 6.461E+05 | 0.000016  | -1.000023 |
|   | ACP3 | 1.196E+02 | 8.134E+00 | 1.361E+05  | -1.361E+05 | -1.361E+05 | -5.445E+05 | 1.000E+00 | 1.619E+04  | 1.317E+07 | 0.000011  | -1.000013 |
|   | ACP4 | 1.195E+02 | 7.837E+00 | 1.361E+05  | -1.361E+05 | -1.361E+05 | -5.443E+05 | 1.000E+00 | 1.666E+04  | 6.487E+05 | 0.000016  | -1.000023 |
|   | ACP5 | 1.195E+02 | 7.841E+00 | 1.361E+05  | -1.361E+05 | -1.361E+05 | -5.442E+05 | 1.000E+00 | 1.708E+04  | 1.054E+06 | 0.000001  | -1.000010 |
|   | ACP6 | 1.943E+02 | 2.577E+01 | 3.033E+05  | -3.034E+05 | -3.033E+05 | -1.213E+06 | 1.000E+00 | 3.782E+04  | 6.432E+05 | 0.000002  | -1.000029 |
|   | BCP1 | 3.590E-01 | 2.630E-01 | 5.266E-01  | -7.897E-01 | -5.266E-01 | -1.055E+00 | 7.968E-01 | 3.820E-02  | 1.627E+00 | 0.259836  | 1.869221  |
|   | BCP2 | 3.198E-01 | 1.048E-01 | 3.336E-01  | -4.384E-01 | -3.336E-01 | -9.155E-01 | 9.438E-01 | 3.248E-02  | 9.752E-01 | 0.386056  | 2.180567  |
|   | BCP3 | 3.141E-01 | 1.044E-01 | 3.266E-01  | -4.310E-01 | -3.266E-01 | -8.889E-01 | 9.409E-01 | 3.055E-02  | 9.647E-01 | 0.272678  | 2.121309  |
|   | BCP4 | 3.179E-01 | 1.079E-01 | 3.346E-01  | -4.425E-01 | -3.346E-01 | -9.066E-01 | 9.395E-01 | 3.125E-02  | 9.765E-01 | 0.289642  | 2.184443  |
|   | BCP5 | 3.137E-01 | 9.713E-02 | 3.198E-01  | -4.170E-01 | -3.198E-01 | -8.909E-01 | 9.483E-01 | 3.164E-02  | 9.467E-01 | 0.334649  | 2.065827  |
|   | BCP6 | 3.478E-01 | 2.496E-01 | 5.007E-01  | -7.503E-01 | -5.007E-01 | -1.005E+00 | 7.965E-01 | 3.614E-02  | 1.587E+00 | 0.195558  | 1.844895  |
|   | RCP  | 2.374E-02 | 3.398E-02 | -7.925E-03 | -2.606E-02 | 7.925E-03  | 1.676E-01  | 2.670E-02 | -1.476E-01 | 2.554E-01 | -1.220614 | 0.189299  |

**Table S2.** In-ring electron density transfer from donor (D) to acceptor orbitals (A), along with the orbital's occupancy and the delocalisation energy,  $E^{(2)}$ .

| molecule | D  |   | occ.(D) |   | A  |         | occ.(A) |     | $E^{(2)}$ (kcal/mol) |   |   |         |         |         |         |       |
|----------|----|---|---------|---|----|---------|---------|-----|----------------------|---|---|---------|---------|---------|---------|-------|
| <b>1</b> | BD | C | 5       | - | N  | 6       | 1.98203 | →   | RY*                  | C | 1 | 0.00365 | 2.25    |         |         |       |
|          | CR | N | 6       |   |    |         | 1.99924 | →   | RY*                  | C | 1 | 0.00813 | 2.37    |         |         |       |
|          | BD | C | 1       | - | N  | 6       | 1.98203 | →   | BD*                  | C | 1 | -       | C       | 2       | 0.03586 | 2.86  |
|          | BD | C | 1       | - | C  | 2       | 1.98607 | →   | BD*                  | C | 1 | -       | N       | 6       | 0.01901 | 2.95  |
|          | BD | C | 1       | - | N  | 6       | 1.75483 | →   | RY*                  | C | 5 |         | 0.00269 | 3.21    |         |       |
|          | BD | C | 1       | - | N  | 6       | 1.98203 | →   | RY*                  | C | 5 |         | 0.00366 | 3.42    |         |       |
|          | LP | N | 6       |   |    |         | 1.89920 | →   | RY*                  | C | 1 |         | 0.00813 | 5.08    |         |       |
|          | LP | N | 6       |   |    |         | 1.89920 | →   | BD*                  | C | 1 | -       | C       | 2       | 0.03586 | 10.50 |
|          | BD | C | 1       | - | N  | 6       | 1.75483 | →   | BD*                  | C | 2 | -       | C       | 3       | 0.42334 | 16.41 |
|          | BD | C | 4       | - | C  | 5       | 1.70352 | →   | BD*                  | C | 1 | -       | N       | 6       | 0.46216 | 22.98 |
|          | BD | C | 1       | - | N  | 6       | 1.75483 | →   | BD*                  | C | 4 | -       | C       | 5       | 0.35481 | 61.62 |
|          | BD | C | 2       | - | C  | 3       | 1.62535 | →   | BD*                  | C | 1 | -       | N       | 6       | 0.46216 | 81.79 |
| <b>2</b> | CR | N | 6       |   |    |         | 1.99923 | →   | RY*                  | C | 1 | 0.00823 | 2.33    |         |         |       |
|          | CR | N | 6       |   |    |         | 1.99923 | →   | RY*                  | C | 5 | 0.00876 | 2.66    |         |         |       |
|          | BD | C | 4       | - | Cl | 13      | 1.98956 | →   | BD*                  | C | 5 | -       | N       | 6       | 0.02120 | 2.76  |
|          | BD | C | 1       | - | N  | 6       | 1.98181 | →   | BD*                  | C | 1 | -       | C       | 2       | 0.03578 | 2.89  |
|          | BD | C | 1       | - | C  | 2       | 1.98563 | →   | BD*                  | C | 1 | -       | N       | 6       | 0.01920 | 2.94  |
|          | BD | C | 1       | - | N  | 6       | 1.98181 | →   | RY*                  | C | 5 | 0.00341 | 3.05    |         |         |       |
|          | BD | C | 5       | - | N  | 6       | 1.75774 | →   | RY*                  | C | 1 | 0.00275 | 3.31    |         |         |       |
|          | BD | C | 5       | - | N  | 6       | 1.98089 | →   | RY*                  | C | 1 | 0.00365 | 3.43    |         |         |       |
|          | BD | C | 4       | - | C  | 5       | 1.98490 | →   | BD*                  | C | 5 | -       | N       | 6       | 0.02120 | 4.10  |
|          | BD | C | 5       | - | N  | 6       | 1.98089 | →   | BD*                  | C | 4 | -       | C       | 5       | 0.03745 | 4.16  |
|          | LP | N | 6       |   |    |         | 1.89916 | →   | RY*                  | C | 1 | 0.00823 | 5.00    |         |         |       |
|          | LP | N | 6       |   |    |         | 1.89916 | →   | RY*                  | C | 5 | 0.00876 | 5.23    |         |         |       |
|          | LP | N | 6       |   |    |         | 1.89916 | →   | BD*                  | C | 1 | -       | C       | 2       | 0.03578 | 10.42 |
|          | LP | N | 6       |   |    |         | 1.89916 | →   | BD*                  | C | 4 | -       | C       | 5       | 0.03745 | 10.85 |
|          | BD | C | 5       | - | N  | 6       | 1.75774 | →   | BD*                  | C | 3 | -       | C       | 4       | 0.44550 | 13.90 |
|          | BD | C | 1       | - | C  | 2       | 1.71214 | →   | BD*                  | C | 5 | -       | N       | 6       | 0.42798 | 20.41 |
|          | BD | C | 5       | - | N  | 6       | 1.75774 | →   | BD*                  | C | 1 | -       | C       | 2       | 0.34336 | 62.92 |
|          | BD | C | 3       | - | C  | 4       | 1.65786 | →   | BD*                  | C | 5 | -       | N       | 6       | 0.42798 | 79.21 |
| <b>3</b> | BD | C | 1       | - | N  | 6       | 1.98089 | →   | RY*                  | C | 5 | 0.00937 | 2.02    |         |         |       |
|          | BD | C | 5       | - | N  | 6       | 1.98089 | →   | RY*                  | C | 1 | 0.00937 | 2.02    |         |         |       |
|          | BD | C | 5       | - | N  | 6       | 1.74693 | →   | RY*                  | C | 1 | 0.00262 | 2.40    |         |         |       |
|          | CR | N | 6       |   |    |         | 1.99922 | →   | RY*                  | C | 1 | 0.00937 | 2.46    |         |         |       |
|          | CR | N | 6       |   |    |         | 1.99922 | →   | RY*                  | C | 5 | 0.00937 | 2.46    |         |         |       |
|          | BD | C | 1       | - | N  | 6       | 1.98089 | →   | RY*                  | C | 5 | 0.00328 | 2.51    |         |         |       |
|          | BD | C | 5       | - | N  | 6       | 1.98089 | →   | RY*                  | C | 1 | 0.00328 | 2.51    |         |         |       |
|          | BD | C | 2       | - | Cl | 13      | 1.98902 | →   | BD*                  | C | 1 | -       | N       | 6       | 0.02143 | 2.90  |
|          | BD | C | 4       | - | Cl | 12      | 1.98902 | →   | BD*                  | C | 5 | -       | N       | 6       | 0.02143 | 2.90  |
|          | BD | C | 1       | - | C  | 2       | 1.98453 | →   | BD*                  | C | 1 | -       | N       | 6       | 0.02143 | 4.11  |
|          | BD | C | 4       | - | C  | 5       | 1.98453 | →   | BD*                  | C | 5 | -       | N       | 6       | 0.02143 | 4.11  |
|          | BD | C | 1       | - | N  | 6       | 1.98089 | →   | BD*                  | C | 1 | -       | C       | 2       | 0.03725 | 4.21  |
|          | BD | C | 5       | - | N  | 6       | 1.98089 | →   | BD*                  | C | 4 | -       | C       | 5       | 0.03725 | 4.21  |
|          | LP | N | 6       |   |    |         | 1.89783 | →   | RY*                  | C | 1 | 0.00937 | 5.32    |         |         |       |
|          | LP | N | 6       |   |    |         | 1.89783 | →   | RY*                  | C | 5 | 0.00937 | 5.32    |         |         |       |
|          | LP | N | 6       |   |    |         | 1.89783 | →   | BD*                  | C | 1 | -       | C       | 2       | 0.03725 | 10.57 |
|          | LP | N | 6       |   |    |         | 1.89783 | →   | BD*                  | C | 4 | -       | C       | 5       | 0.03725 | 10.57 |
|          | BD | C | 5       | - | N  | 6       | 1.74693 | →   | BD*                  | C | 3 | -       | C       | 4       | 0.43849 | 12.70 |
|          | BD | C | 1       | - | C  | 2       | 1.73507 | →   | BD*                  | C | 5 | -       | N       | 6       | 0.43337 | 16.82 |
|          | BD | C | 5       | - | N  | 6       | 1.74693 | →   | BD*                  | C | 1 | -       | C       | 2       | 0.36610 | 70.92 |
| BD       | C  | 3 | -       | C | 4  | 1.64556 | →       | BD* | C                    | 5 | - | N       | 6       | 0.43337 | 85.30   |       |
| <b>4</b> | BD | C | 5       | - | N  | 10      | 1.99194 | →   | BD*                  | C | 1 | -       | N       | 6       | 0.01864 | 2.10  |

|          |    |   |   |   |   |    |         |   |     |   |   |   |   |   |         |       |
|----------|----|---|---|---|---|----|---------|---|-----|---|---|---|---|---|---------|-------|
|          | BD | C | 4 | - | C | 5  | 1.98101 | → | BD* | C | 5 | - | N | 6 | 0.01516 | 2.11  |
|          | BD | C | 5 | - | N | 6  | 1.97955 | → | BD* | C | 4 | - | C | 5 | 0.03478 | 2.18  |
|          | BD | C | 1 | - | N | 6  | 1.98509 | → | RY* | C | 5 |   |   |   | 0.00509 | 2.39  |
|          | CR | N | 6 |   |   |    | 1.99928 | → | RY* | C | 1 |   |   |   | 0.00784 | 2.54  |
|          | BD | C | 1 | - | N | 6  | 1.98509 | → | RY* | C | 5 |   |   |   | 0.00727 | 2.86  |
|          | BD | C | 5 | - | N | 6  | 1.72228 | → | RY* | C | 1 |   |   |   | 0.00255 | 3.01  |
|          | CR | N | 6 |   |   |    | 1.99928 | → | RY* | C | 5 |   |   |   | 0.00727 | 3.07  |
|          | BD | C | 1 | - | N | 6  | 1.98509 | → | BD* | C | 1 | - | C | 2 | 0.03857 | 3.09  |
|          | BD | C | 5 | - | N | 6  | 1.97955 | → | RY* | C | 1 |   |   |   | 0.00356 | 3.25  |
|          | BD | C | 1 | - | C | 2  | 1.98557 | → | BD* | C | 1 | - | N | 6 | 0.01864 | 3.29  |
|          | LP | N | 6 |   |   |    | 1.91356 | → | RY* | C | 5 |   |   |   | 0.00727 | 3.90  |
|          | LP | N | 6 |   |   |    | 1.91356 | → | RY* | C | 1 |   |   |   | 0.00784 | 5.11  |
|          | LP | N | 6 |   |   |    | 1.91356 | → | BD* | C | 1 | - | C | 2 | 0.03857 | 10.79 |
|          | LP | N | 6 |   |   |    | 1.91356 | → | BD* | C | 4 | - | C | 5 | 0.03478 | 10.89 |
|          | BD | C | 5 | - | N | 6  | 1.72228 | → | BD* | C | 3 | - | C | 4 | 0.34602 | 19.71 |
|          | BD | C | 1 | - | C | 2  | 1.65954 | → | BD* | C | 5 | - | N | 6 | 0.44748 | 27.18 |
|          | BD | C | 3 | - | C | 4  | 1.71700 | → | BD* | C | 5 | - | N | 6 | 0.44748 | 55.33 |
|          | BD | C | 5 | - | N | 6  | 1.72228 | → | BD* | C | 1 | - | C | 2 | 0.36183 | 64.43 |
| <b>5</b> | BD | C | 5 | - | N | 6  | 1.97933 | → | BD* | C | 4 | - | C | 5 | 0.03472 | 2.04  |
|          | BD | C | 4 | - | C | 5  | 1.97800 | → | BD* | C | 5 | - | N | 6 | 0.01498 | 2.05  |
|          | BD | C | 5 | - | N | 6  | 1.71990 | → | RY* | C | 1 |   |   |   | 0.00284 | 2.06  |
|          | BD | C | 5 | - | N | 10 | 1.99163 | → | BD* | C | 1 | - | N | 6 | 0.01839 | 2.07  |
|          | BD | C | 1 | - | N | 6  | 1.98502 | → | RY* | C | 5 |   |   |   | 0.00512 | 2.20  |
|          | CR | N | 6 |   |   |    | 1.99928 | → | RY* | C | 1 |   |   |   | 0.00752 | 2.72  |
|          | BD | C | 1 | - | N | 6  | 1.98502 | → | BD* | C | 1 | - | C | 2 | 0.03885 | 2.96  |
|          | CR | N | 6 |   |   |    | 1.99928 | → | RY* | C | 5 |   |   |   | 0.00717 | 2.99  |
|          | BD | C | 1 | - | N | 6  | 1.98502 | → | RY* | C | 5 |   |   |   | 0.00717 | 3.01  |
|          | BD | C | 5 | - | N | 6  | 1.97933 | → | RY* | C | 1 |   |   |   | 0.00362 | 3.11  |
|          | BD | C | 1 | - | C | 2  | 1.98252 | → | BD* | C | 1 | - | N | 6 | 0.01839 | 3.24  |
|          | LP | N | 6 |   |   |    | 1.91350 | → | RY* | C | 5 |   |   |   | 0.00717 | 3.56  |
|          | LP | N | 6 |   |   |    | 1.91350 | → | RY* | C | 1 |   |   |   | 0.00752 | 5.13  |
|          | LP | N | 6 |   |   |    | 1.91350 | → | BD* | C | 1 | - | C | 2 | 0.03885 | 11.05 |
|          | LP | N | 6 |   |   |    | 1.91350 | → | BD* | C | 4 | - | C | 5 | 0.03472 | 11.06 |
|          | BD | C | 5 | - | N | 6  | 1.71990 | → | BD* | C | 3 | - | C | 4 | 0.40740 | 19.83 |
|          | BD | C | 1 | - | C | 2  | 1.66060 | → | BD* | C | 5 | - | N | 6 | 0.45139 | 25.49 |
|          | BD | C | 3 | - | C | 4  | 1.72735 | → | BD* | C | 5 | - | N | 6 | 0.45139 | 52.61 |
|          | BD | C | 5 | - | N | 6  | 1.71990 | → | BD* | C | 1 | - | C | 2 | 0.36081 | 67.16 |
| <b>6</b> | CR | N | 6 |   |   |    | 1.99924 | → | RY* | C | 1 |   |   |   | 0.00795 | 2.34  |
|          | CR | N | 6 |   |   |    | 1.99924 | → | RY* | C | 5 |   |   |   | 0.00808 | 2.41  |
|          | BD | C | 1 | - | N | 6  | 1.98258 | → | BD* | C | 1 | - | C | 2 | 0.03670 | 2.62  |
|          | BD | C | 1 | - | C | 2  | 1.98654 | → | BD* | C | 1 | - | N | 6 | 0.01922 | 2.80  |
|          | BD | C | 5 | - | N | 6  | 1.98240 | → | BD* | C | 4 | - | C | 5 | 0.03702 | 2.80  |
|          | BD | C | 4 | - | C | 5  | 1.98602 | → | BD* | C | 5 | - | N | 6 | 0.01918 | 2.90  |
|          | BD | C | 5 | - | N | 6  | 1.75127 | → | RY* | C | 1 |   |   |   | 0.00248 | 2.99  |
|          | BD | C | 5 | - | N | 6  | 1.98240 | → | RY* | C | 1 |   |   |   | 0.00363 | 3.37  |
|          | BD | C | 1 | - | N | 6  | 1.98258 | → | RY* | C | 5 |   |   |   | 0.00370 | 3.39  |
|          | LP | N | 6 |   |   |    | 1.89893 | → | RY* | C | 1 |   |   |   | 0.00795 | 4.85  |
|          | LP | N | 6 |   |   |    | 1.89893 | → | RY* | C | 5 |   |   |   | 0.00808 | 5.03  |
|          | LP | N | 6 |   |   |    | 1.89893 | → | BD* | C | 4 | - | C | 5 | 0.03702 | 10.74 |
|          | LP | N | 6 |   |   |    | 1.89893 | → | BD* | C | 1 | - | C | 2 | 0.03670 | 10.77 |
|          | BD | C | 5 | - | N | 6  | 1.75127 | → | BD* | C | 3 | - | C | 4 | 0.40233 | 18.58 |
|          | BD | C | 1 | - | C | 2  | 1.66859 | → | BD* | C | 5 | - | N | 6 | 0.44521 | 27.47 |
|          | BD | C | 5 | - | N | 6  | 1.75127 | → | BD* | C | 1 | - | C | 2 | 0.35257 | 58.87 |
|          | BD | C | 3 | - | C | 4  | 1.65118 | → | BD* | C | 5 | - | N | 6 | 0.44521 | 72.68 |
| <b>7</b> | BD | C | 4 | - | C | 5  | 1.98199 | → | BD* | C | 5 | - | N | 6 | 0.01931 | 2.37  |
|          | BD | C | 5 | - | N | 6  | 1.98211 | → | BD* | C | 4 | - | C | 5 | 0.03763 | 2.54  |



|    |   |   |     |         |         |     |     |       |       |         |         |       |
|----|---|---|-----|---------|---------|-----|-----|-------|-------|---------|---------|-------|
| CR | N | 6 |     | 1.99927 | →       | RY* | C   | 1     |       | 0.00782 | 2.62    |       |
| BD | C | 5 | - N | 6       | 1.74256 | →   | RY* | C     | 1     | 0.00234 | 2.82    |       |
| BD | C | 1 | - N | 6       | 1.98458 | →   | BD* | C     | 1 - C | 2       | 0.03822 | 2.98  |
| BD | C | 1 | - N | 6       | 1.98458 | →   | RY* | C     | 5     | 0.00349 | 3.03    |       |
| BD | C | 5 | - N | 6       | 1.98211 | →   | RY* | C     | 1     | 0.00360 | 3.05    |       |
| CR | N | 6 |     | 1.99927 | →       | RY* | C   | 5     |       | 0.00746 | 3.12    |       |
| BD | C | 1 | - C | 2       | 1.98593 | →   | BD* | C     | 1 - N | 6       | 0.02021 | 3.19  |
| LP | N | 6 |     | 1.91029 | →       | RY* | C   | 5     |       | 0.00746 | 4.19    |       |
| LP | N | 6 |     | 1.91029 | →       | RY* | C   | 1     |       | 0.00782 | 5.00    |       |
| LP | N | 6 |     | 1.91029 | →       | BD* | C   | 1 - C | 2     | 0.03822 | 10.30   |       |
| LP | N | 6 |     | 1.91029 | →       | BD* | C   | 4 - C | 5     | 0.03763 | 10.93   |       |
| BD | C | 5 | - N | 6       | 1.74256 | →   | BD* | C     | 3 - C | 4       | 0.34018 | 19.92 |
| BD | C | 1 | - C | 2       | 1.65507 | →   | BD* | C     | 5 - N | 6       | 0.43118 | 30.22 |
| BD | C | 5 | - N | 6       | 1.74256 | →   | BD* | C     | 1 - C | 2       | 0.35355 | 57.51 |
| BD | C | 3 | - C | 4       | 1.69462 | →   | BD* | C     | 5 - N | 6       | 0.43118 | 57.74 |

---
